# Supplementary material
Source: MDPI journal article supplement (https://www.mdpi.com/2073-4352/13/7/990)
Supplement: s1 [file s1]

Archive with 3 entries (3 files):
- all-in-one.cif
- checkcif_all-in-one.pdf
- SI_HerbigKrokeWagler_pyrimidylaminosilanes.pdf
