# Supplementary material
Source: MDPI journal article supplement (https://www.mdpi.com/2073-4352/13/7/990)
Supplement: s1 [file s1 › all-in-one.cif]

 
data_compound1
 
_audit_creation_method            'SHELXL-2019/3'
_shelx_SHELXL_version_number      '2019/3'
_chemical_name_systematic         ?
_chemical_name_common             ?
_chemical_melting_point           ?
_chemical_formula_moiety          'C7 H13 N3 Si' 
_chemical_formula_sum
 'C7 H13 N3 Si' 
_chemical_formula_weight          167.29

loop_
 _atom_type_symbol
 _atom_type_description
 _atom_type_scat_dispersion_real
 _atom_type_scat_dispersion_imag
 _atom_type_scat_source
 'C'  'C'   0.0033   0.0016
 'International Tables Vol C Tables 4.2.6.8 and 6.1.1.4'
 'H'  'H'   0.0000   0.0000
 'International Tables Vol C Tables 4.2.6.8 and 6.1.1.4'
 'N'  'N'   0.0061   0.0033
 'International Tables Vol C Tables 4.2.6.8 and 6.1.1.4'
 'Si'  'Si'   0.0817   0.0704
 'International Tables Vol C Tables 4.2.6.8 and 6.1.1.4'
 
_space_group_crystal_system       monoclinic
_space_group_IT_number            14
_space_group_name_H-M_alt         'P 21/c'
_space_group_name_Hall            '-P 2ybc'
 
_shelx_space_group_comment
;
The symmetry employed for this shelxl refinement is uniquely defined
by the following loop, which should always be used as a source of
symmetry information in preference to the above space-group names.
They are only intended as comments.
;
 
loop_
 _space_group_symop_operation_xyz
 'x, y, z'
 '-x, y+1/2, -z+1/2'
 '-x, -y, -z'
 'x, -y-1/2, z-1/2'
 
_cell_length_a                    9.4337(3)
_cell_length_b                    19.5412(6)
_cell_length_c                    10.7349(3)
_cell_angle_alpha                 90
_cell_angle_beta                  100.794(3)
_cell_angle_gamma                 90
_cell_volume                      1943.92(10)
_cell_formula_units_Z             8
_cell_measurement_temperature     180(2)
_cell_measurement_reflns_used    18668
_cell_measurement_theta_min      1.93
_cell_measurement_theta_max      28.44
 
_exptl_crystal_description        prism
_exptl_crystal_colour             colorless
_exptl_crystal_density_meas       ?
_exptl_crystal_density_method     ?
_exptl_crystal_density_diffrn     1.143          
_exptl_crystal_F_000              720
_exptl_transmission_factor_min    ?
_exptl_transmission_factor_max    ?
_exptl_crystal_size_max           0.400
_exptl_crystal_size_mid           0.250
_exptl_crystal_size_min           0.150
_exptl_absorpt_coefficient_mu     0.188
_shelx_estimated_absorpt_T_min    0.929
_shelx_estimated_absorpt_T_max    0.972
_exptl_absorpt_correction_type   integration
_exptl_absorpt_correction_T_min  0.9316
_exptl_absorpt_correction_T_max  0.9782
_exptl_absorpt_process_details    XShape
_exptl_absorpt_special_details    ?
_diffrn_ambient_temperature       180(2)
_diffrn_radiation_wavelength      0.71073
_diffrn_radiation_type            MoK\a
_diffrn_source                    ?
_diffrn_measurement_device_type   'Stoe IPDS II'
_diffrn_measurement_method        'omega scans'
_diffrn_detector_area_resol_mean  ?
_diffrn_reflns_number             17865
_diffrn_reflns_av_unetI/netI      0.0243
_diffrn_reflns_av_R_equivalents   0.0377
_diffrn_reflns_limit_h_min        -12
_diffrn_reflns_limit_h_max        12
_diffrn_reflns_limit_k_min        -25
_diffrn_reflns_limit_k_max        25
_diffrn_reflns_limit_l_min        -13
_diffrn_reflns_limit_l_max        14
_diffrn_reflns_theta_min          2.084
_diffrn_reflns_theta_max          27.999
_diffrn_reflns_theta_full         25.242
_diffrn_measured_fraction_theta_max   1.000
_diffrn_measured_fraction_theta_full  0.999
_diffrn_reflns_Laue_measured_fraction_max    1.000
_diffrn_reflns_Laue_measured_fraction_full   0.999
_diffrn_reflns_point_group_measured_fraction_max   1.000
_diffrn_reflns_point_group_measured_fraction_full  0.999
_reflns_number_total              4699
_reflns_number_gt                 3874
_reflns_threshold_expression      'I > 2\s(I)'
_reflns_Friedel_coverage          0.000
_reflns_Friedel_fraction_max      .
_reflns_Friedel_fraction_full     .
 
_reflns_special_details
;
 Reflections were merged by SHELXL according to the crystal
 class for the calculation of statistics and refinement.
 
 _reflns_Friedel_fraction is defined as the number of unique
 Friedel pairs measured divided by the number that would be
 possible theoretically, ignoring centric projections and
 systematic absences.
;
 
_computing_data_collection        ?
_computing_cell_refinement        ?
_computing_data_reduction         ?
_computing_structure_solution     ?
_computing_structure_refinement 'SHELXL-2019/2 (Sheldrick, 2019)'
_computing_molecular_graphics     ?
_computing_publication_material   ?
_refine_special_details           ?
_refine_ls_structure_factor_coef  Fsqd
_refine_ls_matrix_type            full
_refine_ls_weighting_scheme       calc
_refine_ls_weighting_details
'w=1/[\s^2^(Fo^2^)+(0.0372P)^2^+0.7171P] where P=(Fo^2^+2Fc^2^)/3'
_atom_sites_solution_primary      direct
_atom_sites_solution_secondary    ?
_atom_sites_solution_hydrogens    mixed
_refine_ls_hydrogen_treatment     mixed
_refine_ls_extinction_method      'SHELXL-2019/2 (Sheldrick 2019)'
_refine_ls_extinction_coef        0.0069(11)
_refine_ls_extinction_expression
 'Fc^*^=kFc[1+0.001xFc^2^\l^3^/sin(2\q)]^-1/4^'
_refine_ls_number_reflns          4699
_refine_ls_number_parameters      214
_refine_ls_number_restraints      0
_refine_ls_R_factor_all           0.0495
_refine_ls_R_factor_gt            0.0367
_refine_ls_wR_factor_ref          0.0957
_refine_ls_wR_factor_gt           0.0876
_refine_ls_goodness_of_fit_ref    1.097
_refine_ls_restrained_S_all       1.097
_refine_ls_shift/su_max           0.000
_refine_ls_shift/su_mean          0.000
 
loop_
 _atom_site_label
 _atom_site_type_symbol
 _atom_site_fract_x
 _atom_site_fract_y
 _atom_site_fract_z
 _atom_site_U_iso_or_equiv
 _atom_site_adp_type
 _atom_site_occupancy
 _atom_site_site_symmetry_order  
 _atom_site_calc_flag
 _atom_site_refinement_flags_posn
 _atom_site_refinement_flags_adp
 _atom_site_refinement_flags_occupancy
 _atom_site_disorder_assembly
 _atom_site_disorder_group
Si1 Si 0.03980(4) 0.32534(2) 0.30053(4) 0.02912(11) Uani 1 1 d . . . . .
N1 N 0.17638(12) 0.38305(7) 0.36312(12) 0.0282(3) Uani 1 1 d . . . . .
H1N H 0.1784(19) 0.3990(9) 0.4364(18) 0.037(5) Uiso 1 1 d . . . . .
N2 N 0.30872(14) 0.37090(7) 0.20421(11) 0.0321(3) Uani 1 1 d . . . . .
N3 N 0.40959(12) 0.42568(7) 0.40057(11) 0.0305(3) Uani 1 1 d . . . . .
C1 C 0.30238(14) 0.39350(7) 0.32121(12) 0.0249(3) Uani 1 1 d . . . . .
C2 C 0.43394(18) 0.38165(9) 0.16613(15) 0.0371(3) Uani 1 1 d . . . . .
H2 H 0.442947 0.366569 0.083844 0.044 Uiso 1 1 calc R U . . .
C3 C 0.55049(16) 0.41341(9) 0.23984(15) 0.0373(4) Uani 1 1 d . . . . .
H3 H 0.638680 0.420068 0.210889 0.045 Uiso 1 1 calc R U . . .
C4 C 0.53220(15) 0.43492(8) 0.35738(14) 0.0338(3) Uani 1 1 d . . . . .
H4 H 0.610204 0.457392 0.410516 0.041 Uiso 1 1 calc R U . . .
C5 C -0.05278(19) 0.34878(9) 0.13868(16) 0.0431(4) Uani 1 1 d . . . . .
H5A H -0.085073 0.396463 0.138059 0.065 Uiso 1 1 calc R U . . .
H5B H -0.136394 0.318827 0.112627 0.065 Uiso 1 1 calc R U . . .
H5C H 0.014097 0.343463 0.079634 0.065 Uiso 1 1 calc R U . . .
C6 C 0.1139(2) 0.23770(9) 0.3000(2) 0.0560(5) Uani 1 1 d . . . . .
H6A H 0.182356 0.235717 0.241771 0.084 Uiso 1 1 calc R U . . .
H6B H 0.034984 0.205312 0.272076 0.084 Uiso 1 1 calc R U . . .
H6C H 0.163450 0.225661 0.385706 0.084 Uiso 1 1 calc R U . . .
C7 C -0.08755(19) 0.33224(12) 0.41248(19) 0.0517(5) Uani 1 1 d . . . . .
H7A H -0.038525 0.318552 0.497505 0.078 Uiso 1 1 calc R U . . .
H7B H -0.170494 0.302154 0.384379 0.078 Uiso 1 1 calc R U . . .
H7C H -0.120864 0.379649 0.414651 0.078 Uiso 1 1 calc R U . . .
Si2 Si 0.56534(4) 0.36798(2) 0.77694(4) 0.03020(11) Uani 1 1 d . . . . .
N4 N 0.40679(12) 0.39812(7) 0.68166(12) 0.0302(3) Uani 1 1 d . . . . .
H4N H 0.403(2) 0.4048(10) 0.6048(19) 0.044(5) Uiso 1 1 d . . . . .
N5 N 0.17435(12) 0.44181(7) 0.63381(11) 0.0301(3) Uani 1 1 d . . . . .
N6 N 0.28902(12) 0.41660(6) 0.84787(11) 0.0268(2) Uani 1 1 d . . . . .
C8 C 0.28607(14) 0.41961(7) 0.72225(13) 0.0247(3) Uani 1 1 d . . . . .
C9 C 0.05786(15) 0.46199(8) 0.67802(15) 0.0338(3) Uani 1 1 d . . . . .
H9 H -0.023101 0.478169 0.619090 0.041 Uiso 1 1 calc R U . . .
C10 C 0.04902(16) 0.46056(8) 0.80427(15) 0.0352(3) Uani 1 1 d . . . . .
H10 H -0.035216 0.474994 0.833471 0.042 Uiso 1 1 calc R U . . .
C11 C 0.16963(16) 0.43694(8) 0.88636(14) 0.0311(3) Uani 1 1 d . . . . .
H11 H 0.167238 0.435126 0.974382 0.037 Uiso 1 1 calc R U . . .
C12 C 0.6866(2) 0.35043(14) 0.66300(19) 0.0605(6) Uani 1 1 d . . . . .
H12A H 0.639391 0.318394 0.598011 0.091 Uiso 1 1 calc R U . . .
H12B H 0.776865 0.330338 0.708205 0.091 Uiso 1 1 calc R U . . .
H12C H 0.707465 0.393298 0.622619 0.091 Uiso 1 1 calc R U . . .
C13 C 0.64880(17) 0.43446(9) 0.89071(15) 0.0379(4) Uani 1 1 d . . . . .
H13A H 0.670672 0.474995 0.843989 0.057 Uiso 1 1 calc R U . . .
H13B H 0.738149 0.416568 0.941808 0.057 Uiso 1 1 calc R U . . .
H13C H 0.581681 0.446939 0.946452 0.057 Uiso 1 1 calc R U . . .
C14 C 0.5322(2) 0.28802(9) 0.86025(19) 0.0456(4) Uani 1 1 d . . . . .
H14A H 0.453905 0.295505 0.907186 0.068 Uiso 1 1 calc R U . . .
H14B H 0.620175 0.274975 0.919505 0.068 Uiso 1 1 calc R U . . .
H14C H 0.505077 0.251359 0.798072 0.068 Uiso 1 1 calc R U . . .
 
loop_
 _atom_site_aniso_label
 _atom_site_aniso_U_11
 _atom_site_aniso_U_22
 _atom_site_aniso_U_33
 _atom_site_aniso_U_23
 _atom_site_aniso_U_13
 _atom_site_aniso_U_12
Si1 0.02218(18) 0.0298(2) 0.0334(2) 0.00280(16) 0.00018(15) -0.00005(15)
N1 0.0234(5) 0.0375(7) 0.0234(6) -0.0026(5) 0.0041(5) -0.0022(5)
N2 0.0342(6) 0.0381(7) 0.0246(6) -0.0022(5) 0.0067(5) 0.0004(5)
N3 0.0246(6) 0.0416(7) 0.0247(6) 0.0010(5) 0.0030(5) -0.0048(5)
C1 0.0239(6) 0.0285(6) 0.0215(6) 0.0030(5) 0.0024(5) 0.0009(5)
C2 0.0410(8) 0.0449(9) 0.0282(7) 0.0025(6) 0.0140(6) 0.0049(7)
C3 0.0292(7) 0.0497(9) 0.0356(8) 0.0103(7) 0.0123(6) 0.0023(7)
C4 0.0255(7) 0.0431(8) 0.0322(7) 0.0070(6) 0.0034(6) -0.0042(6)
C5 0.0401(9) 0.0453(9) 0.0378(9) -0.0024(7) -0.0082(7) -0.0015(7)
C6 0.0433(10) 0.0325(9) 0.0872(15) 0.0046(9) -0.0007(10) 0.0023(7)
C7 0.0329(8) 0.0721(13) 0.0517(10) 0.0023(10) 0.0116(8) -0.0116(8)
Si2 0.02224(19) 0.0416(2) 0.0257(2) -0.00376(17) 0.00174(14) 0.00512(16)
N4 0.0221(5) 0.0482(8) 0.0198(6) -0.0035(5) 0.0027(4) 0.0029(5)
N5 0.0228(5) 0.0394(7) 0.0271(6) 0.0005(5) 0.0019(5) 0.0021(5)
N6 0.0276(6) 0.0304(6) 0.0230(5) -0.0022(5) 0.0060(4) -0.0027(5)
C8 0.0218(6) 0.0279(6) 0.0240(6) -0.0024(5) 0.0032(5) -0.0022(5)
C9 0.0236(6) 0.0386(8) 0.0386(8) -0.0008(6) 0.0040(6) 0.0038(6)
C10 0.0285(7) 0.0380(8) 0.0420(8) -0.0075(7) 0.0139(6) 0.0016(6)
C11 0.0334(7) 0.0336(7) 0.0288(7) -0.0051(6) 0.0120(6) -0.0050(6)
C12 0.0346(9) 0.1034(17) 0.0444(10) -0.0083(11) 0.0095(8) 0.0210(10)
C13 0.0316(7) 0.0433(9) 0.0342(8) 0.0021(7) -0.0055(6) -0.0026(6)
C14 0.0447(9) 0.0348(8) 0.0549(11) -0.0031(8) 0.0032(8) 0.0065(7)
 
_geom_special_details
;
 All esds (except the esd in the dihedral angle between two l.s. planes)
 are estimated using the full covariance matrix.  The cell esds are taken
 into account individually in the estimation of esds in distances, angles
 and torsion angles; correlations between esds in cell parameters are only
 used when they are defined by crystal symmetry.  An approximate (isotropic)
 treatment of cell esds is used for estimating esds involving l.s. planes.
;
 
loop_
 _geom_bond_atom_site_label_1
 _geom_bond_atom_site_label_2
 _geom_bond_distance
 _geom_bond_site_symmetry_2
 _geom_bond_publ_flag
Si1 N1 1.7490(13) . ?
Si1 C6 1.8499(18) . ?
Si1 C5 1.8501(17) . ?
Si1 C7 1.8565(19) . ?
N1 C1 1.3628(17) . ?
N1 H1N 0.844(19) . ?
N2 C2 1.337(2) . ?
N2 C1 1.3433(18) . ?
N3 C4 1.3366(18) . ?
N3 C1 1.3496(17) . ?
C2 C3 1.376(2) . ?
C2 H2 0.9500 . ?
C3 C4 1.371(2) . ?
C3 H3 0.9500 . ?
C4 H4 0.9500 . ?
C5 H5A 0.9800 . ?
C5 H5B 0.9800 . ?
C5 H5C 0.9800 . ?
C6 H6A 0.9800 . ?
C6 H6B 0.9800 . ?
C6 H6C 0.9800 . ?
C7 H7A 0.9800 . ?
C7 H7B 0.9800 . ?
C7 H7C 0.9800 . ?
Si2 N4 1.7485(13) . ?
Si2 C13 1.8544(16) . ?
Si2 C14 1.8556(19) . ?
Si2 C12 1.8562(18) . ?
N4 C8 1.3598(17) . ?
N4 H4N 0.83(2) . ?
N5 C9 1.3356(18) . ?
N5 C8 1.3511(17) . ?
N6 C11 1.3311(18) . ?
N6 C8 1.3448(17) . ?
C9 C10 1.374(2) . ?
C9 H9 0.9500 . ?
C10 C11 1.382(2) . ?
C10 H10 0.9500 . ?
C11 H11 0.9500 . ?
C12 H12A 0.9800 . ?
C12 H12B 0.9800 . ?
C12 H12C 0.9800 . ?
C13 H13A 0.9800 . ?
C13 H13B 0.9800 . ?
C13 H13C 0.9800 . ?
C14 H14A 0.9800 . ?
C14 H14B 0.9800 . ?
C14 H14C 0.9800 . ?
 
loop_
 _geom_angle_atom_site_label_1
 _geom_angle_atom_site_label_2
 _geom_angle_atom_site_label_3
 _geom_angle
 _geom_angle_site_symmetry_1
 _geom_angle_site_symmetry_3
 _geom_angle_publ_flag
N1 Si1 C6 110.28(7) . . ?
N1 Si1 C5 112.66(7) . . ?
C6 Si1 C5 109.77(10) . . ?
N1 Si1 C7 102.94(8) . . ?
C6 Si1 C7 111.10(10) . . ?
C5 Si1 C7 109.94(9) . . ?
C1 N1 Si1 126.52(10) . . ?
C1 N1 H1N 112.6(12) . . ?
Si1 N1 H1N 118.9(12) . . ?
C2 N2 C1 115.52(13) . . ?
C4 N3 C1 116.03(13) . . ?
N2 C1 N3 125.74(13) . . ?
N2 C1 N1 116.98(12) . . ?
N3 C1 N1 117.28(12) . . ?
N2 C2 C3 123.47(14) . . ?
N2 C2 H2 118.3 . . ?
C3 C2 H2 118.3 . . ?
C4 C3 C2 116.27(14) . . ?
C4 C3 H3 121.9 . . ?
C2 C3 H3 121.9 . . ?
N3 C4 C3 122.96(14) . . ?
N3 C4 H4 118.5 . . ?
C3 C4 H4 118.5 . . ?
Si1 C5 H5A 109.5 . . ?
Si1 C5 H5B 109.5 . . ?
H5A C5 H5B 109.5 . . ?
Si1 C5 H5C 109.5 . . ?
H5A C5 H5C 109.5 . . ?
H5B C5 H5C 109.5 . . ?
Si1 C6 H6A 109.5 . . ?
Si1 C6 H6B 109.5 . . ?
H6A C6 H6B 109.5 . . ?
Si1 C6 H6C 109.5 . . ?
H6A C6 H6C 109.5 . . ?
H6B C6 H6C 109.5 . . ?
Si1 C7 H7A 109.5 . . ?
Si1 C7 H7B 109.5 . . ?
H7A C7 H7B 109.5 . . ?
Si1 C7 H7C 109.5 . . ?
H7A C7 H7C 109.5 . . ?
H7B C7 H7C 109.5 . . ?
N4 Si2 C13 111.12(7) . . ?
N4 Si2 C14 111.27(8) . . ?
C13 Si2 C14 111.19(8) . . ?
N4 Si2 C12 104.00(8) . . ?
C13 Si2 C12 108.99(9) . . ?
C14 Si2 C12 110.01(10) . . ?
C8 N4 Si2 126.34(10) . . ?
C8 N4 H4N 112.6(14) . . ?
Si2 N4 H4N 120.7(14) . . ?
C9 N5 C8 115.50(12) . . ?
C11 N6 C8 116.00(12) . . ?
N6 C8 N5 125.85(12) . . ?
N6 C8 N4 116.52(12) . . ?
N5 C8 N4 117.64(12) . . ?
N5 C9 C10 123.41(14) . . ?
N5 C9 H9 118.3 . . ?
C10 C9 H9 118.3 . . ?
C9 C10 C11 116.18(13) . . ?
C9 C10 H10 121.9 . . ?
C11 C10 H10 121.9 . . ?
N6 C11 C10 123.05(14) . . ?
N6 C11 H11 118.5 . . ?
C10 C11 H11 118.5 . . ?
Si2 C12 H12A 109.5 . . ?
Si2 C12 H12B 109.5 . . ?
H12A C12 H12B 109.5 . . ?
Si2 C12 H12C 109.5 . . ?
H12A C12 H12C 109.5 . . ?
H12B C12 H12C 109.5 . . ?
Si2 C13 H13A 109.5 . . ?
Si2 C13 H13B 109.5 . . ?
H13A C13 H13B 109.5 . . ?
Si2 C13 H13C 109.5 . . ?
H13A C13 H13C 109.5 . . ?
H13B C13 H13C 109.5 . . ?
Si2 C14 H14A 109.5 . . ?
Si2 C14 H14B 109.5 . . ?
H14A C14 H14B 109.5 . . ?
Si2 C14 H14C 109.5 . . ?
H14A C14 H14C 109.5 . . ?
H14B C14 H14C 109.5 . . ?
 
loop_
 _geom_torsion_atom_site_label_1
 _geom_torsion_atom_site_label_2
 _geom_torsion_atom_site_label_3
 _geom_torsion_atom_site_label_4
 _geom_torsion
 _geom_torsion_site_symmetry_1
 _geom_torsion_site_symmetry_2
 _geom_torsion_site_symmetry_3
 _geom_torsion_site_symmetry_4
 _geom_torsion_publ_flag
C6 Si1 N1 C1 55.96(15) . . . . ?
C5 Si1 N1 C1 -67.07(14) . . . . ?
C7 Si1 N1 C1 174.56(13) . . . . ?
C2 N2 C1 N3 0.4(2) . . . . ?
C2 N2 C1 N1 -179.71(13) . . . . ?
C4 N3 C1 N2 -0.5(2) . . . . ?
C4 N3 C1 N1 179.63(13) . . . . ?
Si1 N1 C1 N2 17.61(19) . . . . ?
Si1 N1 C1 N3 -162.51(11) . . . . ?
C1 N2 C2 C3 0.2(2) . . . . ?
N2 C2 C3 C4 -0.6(2) . . . . ?
C1 N3 C4 C3 0.0(2) . . . . ?
C2 C3 C4 N3 0.5(2) . . . . ?
C13 Si2 N4 C8 -61.10(15) . . . . ?
C14 Si2 N4 C8 63.39(15) . . . . ?
C12 Si2 N4 C8 -178.21(15) . . . . ?
C11 N6 C8 N5 0.7(2) . . . . ?
C11 N6 C8 N4 -179.18(13) . . . . ?
C9 N5 C8 N6 -0.2(2) . . . . ?
C9 N5 C8 N4 179.60(13) . . . . ?
Si2 N4 C8 N6 -0.7(2) . . . . ?
Si2 N4 C8 N5 179.41(11) . . . . ?
C8 N5 C9 C10 -0.3(2) . . . . ?
N5 C9 C10 C11 0.3(2) . . . . ?
C8 N6 C11 C10 -0.6(2) . . . . ?
C9 C10 C11 N6 0.2(2) . . . . ?
 
_refine_diff_density_max    0.238
_refine_diff_density_min   -0.230
_refine_diff_density_rms    0.042

_shelx_res_file
;

TITL MH424_01
    shelx.res
    created by SHELXL-2019/3 at 21:19:32 on 05-Jun-2023
CELL  0.71073    9.4337  19.5412  10.7349   90.000  100.794   90.000
ZERR     8.00    0.0003   0.0006   0.0003    0.000    0.003    0.000
LATT 1
SYMM -X, Y+ 0.50000, -Z+ 0.50000
SFAC C  H  N  Si
UNIT 56  104  24  8
OMIT -3 56
L.S. 4
ACTA
BOND $H
FMAP 2
PLAN 20
CONF
SIZE 0.40 0.25 0.15
TEMP -93
WGHT    0.037200    0.717100
EXTI    0.006855
FVAR       0.63549
MOLE 1
SI1   4    0.039799    0.325337    0.300528    11.00000    0.02218    0.02982 =
         0.03340    0.00280    0.00018   -0.00005
N1    3    0.176375    0.383048    0.363116    11.00000    0.02343    0.03749 =
         0.02343   -0.00256    0.00407   -0.00217
H1N   2    0.178363    0.399042    0.436427    11.00000    0.03686
N2    3    0.308724    0.370902    0.204208    11.00000    0.03416    0.03807 =
         0.02459   -0.00216    0.00673    0.00035
N3    3    0.409586    0.425685    0.400566    11.00000    0.02462    0.04155 =
         0.02472    0.00096    0.00299   -0.00481
C1    1    0.302380    0.393500    0.321213    11.00000    0.02393    0.02847 =
         0.02149    0.00298    0.00236    0.00090
C2    1    0.433940    0.381652    0.166131    11.00000    0.04105    0.04494 =
         0.02816    0.00253    0.01398    0.00490
AFIX  43
H2    2    0.442947    0.366569    0.083844    11.00000   -1.20000
AFIX   0
C3    1    0.550489    0.413415    0.239838    11.00000    0.02918    0.04966 =
         0.03555    0.01026    0.01229    0.00231
AFIX  43
H3    2    0.638680    0.420068    0.210889    11.00000   -1.20000
AFIX   0
C4    1    0.532203    0.434918    0.357378    11.00000    0.02547    0.04310 =
         0.03219    0.00699    0.00339   -0.00421
AFIX  43
H4    2    0.610204    0.457392    0.410516    11.00000   -1.20000
AFIX   0
C5    1   -0.052777    0.348778    0.138684    11.00000    0.04010    0.04530 =
         0.03776   -0.00240   -0.00824   -0.00151
AFIX 137
H5A   2   -0.085073    0.396463    0.138059    11.00000   -1.50000
H5B   2   -0.136394    0.318827    0.112627    11.00000   -1.50000
H5C   2    0.014097    0.343463    0.079634    11.00000   -1.50000
AFIX   0
C6    1    0.113853    0.237705    0.299953    11.00000    0.04331    0.03250 =
         0.08719    0.00456   -0.00072    0.00226
AFIX 137
H6A   2    0.182356    0.235717    0.241771    11.00000   -1.50000
H6B   2    0.034984    0.205312    0.272076    11.00000   -1.50000
H6C   2    0.163450    0.225661    0.385706    11.00000   -1.50000
AFIX   0
C7    1   -0.087552    0.332237    0.412480    11.00000    0.03286    0.07209 =
         0.05173    0.00231    0.01159   -0.01161
AFIX 137
H7A   2   -0.038525    0.318552    0.497505    11.00000   -1.50000
H7B   2   -0.170494    0.302154    0.384379    11.00000   -1.50000
H7C   2   -0.120864    0.379649    0.414651    11.00000   -1.50000
AFIX   0
MOLE 2
SI2   4    0.565339    0.367977    0.776939    11.00000    0.02224    0.04161 =
         0.02568   -0.00376    0.00174    0.00512
N4    3    0.406791    0.398124    0.681664    11.00000    0.02209    0.04816 =
         0.01983   -0.00346    0.00274    0.00290
H4N   2    0.402633    0.404789    0.604802    11.00000    0.04406
N5    3    0.174349    0.441812    0.633808    11.00000    0.02280    0.03937 =
         0.02707    0.00049    0.00187    0.00209
N6    3    0.289022    0.416597    0.847868    11.00000    0.02758    0.03043 =
         0.02296   -0.00215    0.00604   -0.00272
C8    1    0.286068    0.419612    0.722252    11.00000    0.02178    0.02793 =
         0.02398   -0.00240    0.00319   -0.00219
C9    1    0.057857    0.461989    0.678021    11.00000    0.02363    0.03855 =
         0.03861   -0.00081    0.00401    0.00375
AFIX  43
H9    2   -0.023101    0.478169    0.619090    11.00000   -1.20000
AFIX   0
C10   1    0.049016    0.460562    0.804273    11.00000    0.02850    0.03804 =
         0.04196   -0.00754    0.01386    0.00165
AFIX  43
H10   2   -0.035216    0.474994    0.833471    11.00000   -1.20000
AFIX   0
C11   1    0.169628    0.436938    0.886364    11.00000    0.03336    0.03360 =
         0.02877   -0.00514    0.01205   -0.00497
AFIX  43
H11   2    0.167238    0.435126    0.974382    11.00000   -1.20000
AFIX   0
C12   1    0.686572    0.350431    0.662997    11.00000    0.03457    0.10342 =
         0.04441   -0.00826    0.00948    0.02099
AFIX 137
H12A  2    0.639391    0.318394    0.598011    11.00000   -1.50000
H12B  2    0.776865    0.330338    0.708205    11.00000   -1.50000
H12C  2    0.707465    0.393298    0.622619    11.00000   -1.50000
AFIX   0
C13   1    0.648799    0.434457    0.890709    11.00000    0.03160    0.04332 =
         0.03419    0.00210   -0.00552   -0.00264
AFIX 137
H13A  2    0.670672    0.474995    0.843989    11.00000   -1.50000
H13B  2    0.738149    0.416568    0.941808    11.00000   -1.50000
H13C  2    0.581681    0.446939    0.946452    11.00000   -1.50000
AFIX   0
C14   1    0.532217    0.288022    0.860254    11.00000    0.04473    0.03485 =
         0.05493   -0.00306    0.00324    0.00646
AFIX 137
H14A  2    0.453905    0.295505    0.907186    11.00000   -1.50000
H14B  2    0.620175    0.274975    0.919505    11.00000   -1.50000
H14C  2    0.505077    0.251359    0.798072    11.00000   -1.50000

AFIX   0
HKLF 4


REM  MH424_01
REM wR2 = 0.0957, GooF = S = 1.097, Restrained GooF = 1.097 for all data
REM R1 = 0.0367 for 3874 Fo > 4sig(Fo) and 0.0495 for all 4699 data
REM 214 parameters refined using 0 restraints

END

WGHT      0.0372      0.7170

REM Highest difference peak  0.238,  deepest hole -0.230,  1-sigma level  0.042
Q1    1   0.1087  0.4526  0.8358  11.00000  0.05    0.24
Q2    1   0.6166  0.4054  0.8369  11.00000  0.05    0.22
Q3    1   0.4998  0.3862  0.2169  11.00000  0.05    0.20
Q4    1   0.2415  0.3840  0.3473  11.00000  0.05    0.20
Q5    1   0.4658  0.3995  0.7233  11.00000  0.05    0.19
Q6    1   0.3102  0.3812  0.2618  11.00000  0.05    0.18
Q7    1   0.0164  0.4588  0.8177  11.00000  0.05    0.18
Q8    1   0.3466  0.4005  0.7100  11.00000  0.05    0.18
Q9    1   0.3668  0.4047  0.3619  11.00000  0.05    0.18
Q10   1   0.2205  0.4301  0.6758  11.00000  0.05    0.18
Q11   1  -0.0214  0.3523  0.2065  11.00000  0.05    0.18
Q12   1   0.1255  0.4493  0.6607  11.00000  0.05    0.17
Q13   1   0.2647  0.3433  0.1837  11.00000  0.05    0.17
Q14   1   0.0457  0.4540  0.7470  11.00000  0.05    0.17
Q15   1   0.3726  0.3684  0.2014  11.00000  0.05    0.17
Q16   1   0.5465  0.4092  0.3006  11.00000  0.05    0.17
Q17   1   0.4531  0.4366  0.3782  11.00000  0.05    0.17
Q18   1  -0.0267  0.3379  0.3794  11.00000  0.05    0.16
Q19   1   0.5731  0.3222  0.8504  11.00000  0.05    0.16
Q20   1   0.0046  0.3186  0.1786  11.00000  0.05    0.16
;
_shelx_res_checksum   40895

_shelx_hkl_file
;
 -11   5  -3   -4.22    2.43   0
 -11   6   7   11.36    2.20   0
 -11   7   1   22.68    2.17   0
 -11   7   4   37.36    2.57   0
 -10   6  -2  127.46    2.59   0
 -10   6   7   61.01    3.09   0
 -10   7   0   33.20    2.08   0
 -10   7   5   11.48    2.08   0
  -9   3  -6   69.20    1.95   0
  -9   4  -5   -1.60    1.63   0
  -9   5  -4   50.18    1.85   0
  -9   6   7   50.27    2.62   0
  -9   7   5   58.81    2.41   0
  -8  -2  -9   -3.82    2.56   0
  -8   0  -8   -2.85    2.51   0
  -8   3  -6   19.93    1.65   0
  -8   4  -5    3.44    2.23   0
  -8   5  -4    8.60    1.73   0
  -8   5   8    6.07    3.06   0
  -8   7   0   81.86    2.49   0
  -7   0  -8    4.79    2.28   0
  -7   3  -6   19.53    1.46   0
  -7   4  -5   82.36    2.10   0
  -7   5  -4   38.44    1.73   0
  -7   7   0  306.25    2.79   0
  -7   7   1  540.84    3.88   0
  -7   7   3   22.03    1.97   0
  -6  -4 -10   44.70    2.02   0
  -6  -2  -9   15.78    2.24   0
  -6   0  -8   47.35    1.86   0
  -5  -5  13   16.94    2.25   0
  -5   1  -7   20.31    2.06   0
  -5   6   0    5.55    1.91   0
  -4  -7  13   10.86    2.28   0
  -4  -3  -9  269.71    2.82   0
  -4  -1  -8  220.80    2.50   0
  -4   5  -1  165.62    2.72   0
  -3 -10 -11   21.08    2.50   0
  -3 -10  13   30.26    2.65   0
  -3  -4  -9   58.27    2.06   0
  -3  -4  11   20.01    1.91   0
  -3  -2  -8   63.61    1.84   0
  -2 -12 -11   10.99    2.32   0
  -2 -10  12    3.19    1.77   0
  -2  -8 -10    1.87    1.94   0
  -2  -1   8  194.17    2.93   0
  -2   3  -1  855.33    5.86   0
  -1 -10  11   43.75    2.39   0
  -1  -7  10   27.49    2.01   0
  -1  -5  -8  191.97    2.82   0
  -1  -5   9   54.57    1.78   0
  -1  -3   8   60.64    2.04   0
  -1  -2  -6    6.10    1.94   0
  -1   0  -4  134.16    2.59   0
   0 -16  11    5.26    2.48   0
   0 -11  10   49.98    2.41   0
   0 -10  -9  131.63    2.90   0
   0  -8   9    9.70    2.08   0
   0  -6   8  254.04    2.59   0
   0  -3   6  465.31    3.64   0
   0  -2   5   33.37    1.70   0
   0  -1  -3  233.96    4.15   0
   1 -13   9   35.99    2.23   0
   1 -10   8   25.15    1.63   0
   1  -8  -7    0.23    1.71   0
   1  -6   6   74.36    1.66   0
   1  -3   3 1533.16    7.12   0
   2 -20   8   37.98    2.08   0
   2 -19   8   20.13    1.82   0
   2 -18   8   -3.22    1.69   0
   2 -17   8   39.76    2.22   0
   2 -13   7  138.29    2.09   0
   2 -10   6   52.70    1.61   0
   2  -8   5  375.73    3.06   0
   2  -7   4  133.96    2.09   0
   2  -6   3  208.77    2.90   0
   2  -5  -1    6.32    1.95   0
   2  -5   1   15.71    1.97   0
   3 -22   6    1.83    2.26   0
   3 -21   6   28.67    2.25   0
   3 -19   6   22.45    2.05   0
   3 -15   5   18.43    1.52   0
   3 -14   5    7.25    2.03   0
   3 -12   4  477.83    3.20   0
   3  -9  -2  260.82    3.73   0
   3  -9   1   11.69    1.48   0
   4 -24  -2   -0.47    2.51   0
   4 -24  -1    2.66    1.84   0
   4 -24   0   19.12    1.93   0
   4 -24   1    4.63    2.48   0
   4 -23  -3    6.61    2.02   0
   4 -23   1   20.90    1.80   0
   4 -23   2   -0.86    2.07   0
   4 -22  -3    2.36    2.32   0
   4 -22   2   10.17    2.35   0
   4 -21  -3   12.36    2.21   0
   4 -21   2  226.37    3.14   0
   4 -20  -3   13.37    2.17   0
   4 -20   2   44.41    2.40   0
   4 -19  -3   50.34    2.50   0
   4 -19   2   -0.75    2.18   0
   4 -18  -3   25.02    2.03   0
   4 -18   2    4.44    2.07   0
   4 -17   1  377.78    3.11   0
   4 -16  -2   20.56    2.26   0
   4 -16   0   39.00    1.70   0
   4 -16   1   59.46    2.37   0
   4 -15  -1  139.60    2.66   0
   4 -15   0    4.96    1.94   0
 -11   4  -4   10.19    1.89   0
 -11   6  -1    8.75    1.86   0
 -11   7   2   -3.07    1.76   0
 -11   7   3    3.90    1.86   0
 -10   2  -6    5.97    2.16   0
 -10   5  -3   95.51    2.54   0
 -10   7   1    8.79    1.93   0
 -10   7   2   76.44    2.51   0
 -10   7   4  104.56    2.67   0
  -9   1  -7   39.63    1.95   0
  -9   6  -2  197.59    2.86   0
  -9   7   0  197.83    2.42   0
  -9   7   1   88.29    2.38   0
  -9   7   4   27.68    2.16   0
  -8   1  -7   31.21    2.22   0
  -8   6  -2   32.24    2.08   0
  -8   7   1   47.96    2.27   0
  -8   7   4   13.03    2.10   0
  -7  -2  -9   54.74    2.07   0
  -7   6  -2  388.39    2.94   0
  -7   7   2  327.15    3.13   0
  -6  -5 -10   61.73    2.59   0
  -6   1  -7    3.13    1.73   0
  -6   5  -3   39.03    1.90   0
  -6   6  -1  385.43    3.32   0
  -5  -8 -11    3.69    1.74   0
  -5  -5 -10   25.89    1.82   0
  -5  -3  -9  119.46    2.63   0
  -5  -1  -8   26.04    2.01   0
  -5   2  -6  128.91    2.01   0
  -5   3  -5  160.76    2.08   0
  -5   4  -4   37.84    1.55   0
  -5   6   1  245.57    2.92   0
  -5   6   2  605.81    4.68   0
  -4  -9 -11   18.53    2.21   0
  -4  -6 -10  301.10    3.41   0
  -4  -4  12    0.20    2.21   0
  -4  -2  11  259.68    3.54   0
  -4   0  -7   -4.41    1.78   0
  -4   1   9   44.50    2.44   0
  -4   4  -3    8.64    1.28   0
  -3  -9  13   11.86    2.42   0
  -3  -7 -10    1.13    1.85   0
  -3  -6  12   55.09    2.44   0
  -3  -2  10   15.29    1.65   0
  -3  -1  -7  736.57    4.10   0
  -3   3  -3 2625.62    7.95   0
  -3   4  -1 2045.22    7.70   0
  -2 -13 -11    1.60    2.38   0
  -2  -9  12    3.62    1.50   0
  -2  -6  -9   10.65    2.00   0
  -2  -6  11   23.28    2.29   0
  -2  -4  10   43.66    1.77   0
  -2  -2  -7  596.89    3.85   0
  -2   2  -3 1147.98    5.70   0
  -1 -14  12   15.73    1.78   0
  -1 -11 -10    2.68    1.94   0
  -1  -9  11   99.16    2.42   0
  -1  -1  -5  491.40    4.18   0
   0 -15 -10   21.72    2.75   0
   0 -15  11    2.55    1.83   0
   0 -14  11   20.80    2.31   0
   0 -10  10   12.96    2.51   0
   0  -4  -6   22.39    2.08   0
   0  -4   7  119.63    2.02   0
   0  -1   4   51.19    2.14   0
   0   0   1    6.31    3.58   0
   1 -17  10    2.47    2.42   0
   1 -16  10    0.97    2.04   0
   1 -12   9   -1.81    1.69   0
   1  -9   8  183.54    2.71   0
   1  -7   7  197.45    2.26   0
   1  -5  -5    1.28    2.09   0
   1  -4  -4  949.15    9.54   0
   2 -16   8   43.23    1.92   0
   2 -15   8   28.74    2.29   0
   2 -12   7   90.72    1.97   0
   2  -9   6   73.33    1.89   0
   3 -18   6    4.82    1.60   0
   3 -17   6   37.21    1.78   0
   3 -16   6   28.92    2.33   0
   3 -15  -6  157.61    4.65   0
   3 -13   5    6.43    1.88   0
   3 -11   4   42.11    1.94   0
   3 -10   3  162.87    2.14   0
   3  -9   2  282.47    3.11   0
   4 -24  -3   -2.13    2.56   0
   4 -24   2   10.32    1.84   0
   4 -23   3    7.36    2.17   0
   4 -22   3    5.13    2.43   0
   4 -21   3    4.45    2.33   0
   4 -20   3   41.65    2.38   0
   4 -19   3    9.37    2.11   0
   4 -18   3    2.93    2.05   0
   4 -17  -3   70.56    2.41   0
   4 -17   2   18.55    1.51   0
   4 -16   2    8.85    1.99   0
   4 -15  -2    5.03    2.01   0
   4 -15   1   75.12    1.79   0
   4 -14  -1    0.72    1.61   0
   4 -14   0    4.77    1.72   0
 -12   6   1    3.09    1.83   0
 -12   6   2    3.22    2.52   0
 -12   6   5    3.49    2.58   0
 -11   5  -2   60.31    2.38   0
 -11   5   8   -0.25    2.59   0
 -11   6   0   81.99    2.70   0
 -11   6   6   58.45    2.75   0
 -10   3  -5    0.80    1.78   0
 -10   4  -4    4.26    1.83   0
 -10   6  -1    7.35    1.65   0
 -10   7   3   45.31    1.88   0
  -9   2  -6    2.85    1.79   0
  -9   3  -5  121.81    2.56   0
  -9   4  -4   11.70    2.18   0
  -9   5  -3   29.96    1.74   0
  -9   7   2   77.88    2.29   0
  -9   7   3    1.43    2.07   0
  -8  -1  -8   88.10    2.49   0
  -8   2  -6   71.70    2.42   0
  -8   2  11    8.54    4.60   0
  -8   5  -3   -0.11    1.89   0
  -8   7   2    9.33    1.58   0
  -8   7   3   41.13    1.91   0
  -7  -3  -9  232.76    3.23   0
  -7  -2  13   52.58    3.12   0
  -7  -1  -8   18.68    2.22   0
  -7   1  -7  114.97    2.19   0
  -7   2  -6   -3.90    1.73   0
  -7   5  -3    2.38    1.63   0
  -7   6  -1  141.30    2.55   0
  -6  -3  -9   31.79    2.28   0
  -6  -3  13   11.42    2.47   0
  -6  -1  -8  150.35    2.47   0
  -6  -1  12   -0.26    2.32   0
  -6   2  -6   14.45    1.63   0
  -6   2  10    2.27    2.95   0
  -6   3  -5   61.89    2.18   0
  -6   4  -4  245.17    2.63   0
  -5  -6 -10    6.85    2.20   0
  -5   1  10  341.17    4.59   0
  -5   5  -2   16.34    1.30   0
  -4 -10 -11   83.11    2.92   0
  -4  -6  13    2.36    2.32   0
  -4  -4  -9   42.42    2.25   0
  -4  -2  -8   54.94    2.32   0
  -4   1  -6   33.03    1.47   0
  -4   2  -5   13.24    1.73   0
  -4   3  -4 2156.61    6.67   0
  -4   5   0   50.16    1.77   0
  -4   5   3   18.59    2.13   0
  -3 -11 -11   15.65    2.11   0
  -3  -5  -9   12.72    2.06   0
  -3  -3  -8  217.06    2.85   0
  -3   1   8  356.25    4.44   0
  -3   4   3 1051.07   10.11   0
  -2  -9 -10    4.67    1.92   0
  -2  -8  12   69.39    2.58   0
  -2  -4  -8    6.86    1.50   0
  -2  -2   9  161.04    2.46   0
  -2  -1  -6  706.51    4.34   0
  -2   2   5  131.74    4.00   0
  -2   3   0   -0.37    2.11   0
  -1 -12  12   17.01    2.53   0
  -1  -8  -9    2.47    1.95   0
  -1  -6  10   32.17    2.09   0
  -1  -4   9   82.16    2.43   0
  -1   1   4  575.83    6.18   0
   0 -13  11   -1.90    1.68   0
   0  -9  10  106.42    2.43   0
   0  -7   9  130.42    2.09   0
   0  -5   8  225.42    2.78   0
   1 -15  -9   40.72    3.10   0
   1 -15  10    3.33    1.72   0
   1 -11  -8    1.70    2.55   0
   1 -11   9   21.03    1.69   0
   1  -5   6  155.54    2.52   0
   1  -4   5  211.89    2.96   0
   1  -2   1  670.65    6.79   0
   2 -14   8   44.68    1.90   0
   2 -13   8   15.66    2.04   0
   2 -11   7    2.89    1.28   0
   2  -5   2   19.20    1.47   0
   3 -21   7    2.66    2.25   0
   3 -20   7    0.54    2.26   0
   3 -15   6    2.96    1.55   0
   3 -14   6  139.42    2.36   0
   3 -12   5   24.09    2.07   0
   3  -8   0   86.73    2.46   0
   3  -8   1  245.11    3.17   0
   4 -23  -4    1.09    2.07   0
   4 -22  -4    2.52    2.16   0
   4 -21  -4   13.21    2.31   0
   4 -21   4   20.31    2.28   0
   4 -20  -4   39.51    2.40   0
   4 -20   4    3.42    1.99   0
   4 -19  -4    2.28    2.06   0
   4 -17   3   98.85    1.86   0
   4 -16  -3  243.19    3.76   0
   4 -16   3   39.41    2.12   0
   4 -15   2   15.74    1.46   0
   4 -14  -2    9.91    1.83   0
   4 -14   1    1.50    1.36   0
 -12   5   0    1.59    2.45   0
 -12   6   3    4.13    1.82   0
 -12   6   4   -1.72    1.85   0
 -11   3  -4   68.87    2.11   0
 -11   4  -3  143.57    2.39   0
 -11   6   1    1.34    2.18   0
 -10   1  -6   90.81    2.53   0
 -10   5  -2   16.68    2.19   0
 -10   5   8    0.67    2.68   0
 -10   6   0  145.40    2.71   0
 -10   6   6   50.47    2.83   0
  -9   0  -7   -5.03    1.68   0
  -9   5   8   20.83    2.58   0
  -9   6  -1   91.81    2.05   0
  -8   3  -5   10.53    1.52   0
  -8   4  -4    6.46    1.34   0
  -8   4   9   25.66    4.10   0
  -8   6  -1   21.35    1.56   0
  -8   6   6  358.69    4.39   0
  -7   0  12   25.79    3.30   0
  -7   3  -5  119.89    1.98   0
  -7   4  -4   -3.50    1.58   0
  -6  -6 -10   -3.65    2.03   0
  -6   5  -2   65.77    2.06   0
  -6   6   0    6.46    1.35   0
  -6   6   4  629.30    5.33   0
  -5  -4  -9    8.59    2.03   0
  -5  -4  13    3.86    2.49   0
  -5  -2  12    5.65    2.28   0
  -5   0  -7   -3.90    1.53   0
  -5   4  -3  605.27    3.67   0
  -4  -7 -10    1.99    1.97   0
  -4   0  10   12.67    2.17   0
  -4   4  -2  104.92    2.42   0
  -4   5   1   12.22    1.93   0
  -4   5   2   27.17    2.12   0
  -3 -12 -11    0.36    2.48   0
  -3  -8 -10   78.70    2.28   0
  -3  -8  13   19.77    1.87   0
  -3  -5  12   37.55    2.23   0
  -3  -3  11   16.91    2.19   0
  -3   0  -6  267.22    2.58   0
  -3   0   9    1.87    1.95   0
  -3   1  -5  678.65    4.11   0
  -3   2  -4  341.94    3.04   0
  -3   2   7  134.63    3.26   0
  -3   4   0  337.05    3.63   0
  -2 -14 -11    8.02    2.15   0
  -2  -5  11   82.32    2.55   0
  -2   0  -5   -0.86    1.41   0
  -2   1  -4 1047.79    5.30   0
  -2   3   1    1.83    2.12   0
  -2   3   2  184.46    5.15   0
  -1 -12 -10   18.00    2.24   0
  -1 -11  12   11.90    2.41   0
  -1  -8  11   -3.94    1.66   0
  -1  -6  -8   67.80    2.40   0
  -1  -4  -7    8.34    1.31   0
  -1   1  -2  935.51    6.71   0
   0 -16 -10   18.34    2.78   0
   0 -12  11   21.76    1.80   0
   0 -11  -9  216.38    3.53   0
   0  -8  -8   27.76    1.99   0
   0  -6  -7   61.38    2.24   0
   0  -3  -5   21.51    1.95   0
   0  -2  -4  605.73    5.57   0
   1 -14  10  119.75    2.18   0
   1 -13  10   52.10    2.44   0
   1 -10   9  432.91    3.42   0
   1  -8   8  479.50    3.30   0
   1  -6   7   22.62    1.88   0
   1  -3   4  469.70    3.77   0
   1  -2   0  683.40    8.20   0
   2 -18   9    1.16    1.88   0
   2 -17   9   12.40    1.89   0
   2 -16   9  113.51    2.56   0
   2 -12   8   -4.05    1.71   0
   2 -10   7   49.46    1.69   0
   2  -8   6   33.08    1.93   0
   2  -7   5   21.57    1.29   0
   2  -6   4   72.37    1.82   0
   3 -19   7   10.87    1.90   0
   3 -18   7  138.80    2.40   0
   3 -17   7   14.00    2.26   0
   3 -13   6   66.33    2.29   0
   3 -12  -5   73.05    3.24   0
   3 -11   5    3.57    1.92   0
   3 -10   4   78.78    1.82   0
   3  -9   3    9.78    1.27   0
   3  -8  -1   30.98    1.74   0
   3  -8   2    5.26    1.82   0
   4 -24  -4    4.05    2.44   0
   4 -23   4    1.13    1.89   0
   4 -22   4   -0.41    1.84   0
   4 -19   4   98.70    2.19   0
   4 -18  -4   48.38    2.50   0
   4 -18   4   19.38    1.75   0
   4 -17  -4  153.99    3.42   0
   4 -17   4   23.73    2.32   0
   4 -15  -3  202.31    3.29   0
   4 -15   3  239.40    2.71   0
   4 -14   2    4.99    1.48   0
   4 -13  -1   19.99    1.91   0
   4 -13   0   20.61    1.37   0
   4 -13   1    7.87    1.36   0
 -11   5  -1   71.47    2.03   0
 -11   6   2   53.50    2.27   0
 -11   6   3   42.65    2.58   0
 -11   6   4   -1.27    2.25   0
 -11   6   5   36.66    2.30   0
 -10   2  -5    3.31    1.60   0
 -10   3  -4    8.65    1.58   0
 -10   4  -3    0.34    1.56   0
 -10   6   1   -1.77    2.03   0
  -9   1  -6   15.21    1.62   0
  -9   5  -2   12.96    1.97   0
  -9   6   0    6.75    1.99   0
  -9   6   6   -0.09    2.27   0
  -8  -2  -8    0.08    2.15   0
  -8   0  -7    2.02    1.45   0
  -8   5  -2    9.51    2.04   0
  -8   6   0   15.56    1.95   0
  -7  -4  -9    4.10    2.06   0
  -7  -2  -8    5.65    2.13   0
  -7   0  -7   -2.46    1.50   0
  -7   5  -2   17.33    2.18   0
  -7   6   0  332.27    3.08   0
  -7   6   5  190.25    3.50   0
  -6  -4  -9    5.30    2.01   0
  -6  -2  -8   22.70    2.18   0
  -6   0  -7    2.10    1.35   0
  -6   6   1  451.43    3.51   0
  -6   6   2  463.24    3.99   0
  -6   6   3    0.26    1.90   0
  -5  -7 -10  252.97    3.34   0
  -5  -2  -8    2.25    1.36   0
  -5   0  11    1.33    2.44   0
  -5   1  -6    5.48    1.30   0
  -5   2  -5  970.23    4.34   0
  -5   3  -4  125.96    2.36   0
  -5   5  -1   49.05    1.61   0
  -5   5   5  280.66    5.12   0
  -4 -11 -11    3.82    1.83   0
  -4  -5  -9    0.70    2.15   0
  -4  -5  13   16.40    2.13   0
  -4  -3  12   -0.96    2.10   0
  -4  -1  -7   -0.31    1.35   0
  -3 -13 -11   -5.20    2.55   0
  -3  -7  13   16.03    2.12   0
  -3  -2  -7  325.95    3.06   0
  -3   4   1  840.70    6.23   0
  -2 -10 -10   19.99    1.94   0
  -2 -10  13   17.80    2.52   0
  -2  -7  -9    2.87    1.77   0
  -2  -7  12   19.84    2.19   0
  -2  -3  -7   90.71    2.29   0
  -2  -3  10   18.04    1.69   0
  -1 -10  12   -1.16    2.37   0
  -1  -9  -9   80.52    2.44   0
  -1  -7  11    2.07    1.96   0
  -1  -5  10   64.53    2.29   0
  -1  -2   8    2.85    1.77   0
  -1  -1   7  223.41    2.87   0
  -1   0   6 1011.54    6.40   0
   0 -17 -10   11.28    2.94   0
   0 -11  11   -0.68    1.61   0
   0  -8  10   42.30    1.65   0
   0  -6   9   15.81    1.40   0
   0  -3   7   11.25    1.88   0
   0  -2   6    3.76    2.01   0
   1 -12  10   15.59    2.33   0
   1  -9   9   87.89    2.16   0
   1  -7   8  396.86    3.28   0
   1  -2   2    7.87    1.64   0
   2 -15   9    3.68    1.64   0
   2 -11   8   47.57    1.99   0
   2  -9   7   34.25    2.05   0
   2  -5  -2   19.61    2.19   0
   2  -5   3   93.36    2.02   0
   3 -16   7   26.24    1.81   0
   3 -15   7    5.21    2.24   0
   3 -12   6  233.11    2.88   0
   3  -9  -3   63.00    2.54   0
   3  -9   4  421.53    3.29   0
   4 -22   5    2.46    2.49   0
   4 -21   5   12.90    2.52   0
   4 -20   5   42.21    2.55   0
   4 -19   5   19.67    2.24   0
   4 -18   5    6.34    2.07   0
   4 -16   4   -0.51    1.35   0
   4 -15   4   53.49    2.05   0
   4 -14  -3  148.61    2.90   0
   4 -14   3    7.99    1.54   0
   4 -13  -2   45.80    2.05   0
   4 -13   2   12.62    1.47   0
   4 -12   0   24.41    1.91   0
   4 -12   1   -2.62    1.80   0
 -12   5   1   -0.67    1.80   0
 -11   2  -4   -1.11    1.82   0
 -11   3  -3   68.19    2.19   0
 -11   4  -2   10.99    1.81   0
 -11   5   0   91.16    2.62   0
 -10   0  -6   -2.26    1.85   0
 -10   5  -1   74.64    2.25   0
 -10   6   2   41.91    2.36   0
 -10   6   5  142.23    2.99   0
  -9  -1  -7   37.19    2.01   0
  -9   2  -5   17.01    1.71   0
  -9   3  -4  128.56    2.16   0
  -9   4  -3  388.39    3.06   0
  -9   6   1  174.81    2.73   0
  -8   1  -6   92.92    2.02   0
  -8   2  -5    5.10    2.15   0
  -8   4  -3    6.76    1.99   0
  -7   1  -6   -1.47    1.25   0
  -7   4  -3  145.30    2.48   0
  -7   5   7   47.20    3.62   0
  -7   6   1  134.36    2.48   0
  -6  -7 -10    8.64    1.89   0
  -6   1  -6   51.46    1.80   0
  -6   1  11  123.99    3.71   0
  -6   2  -5   49.13    2.11   0
  -6   3  -4   63.47    2.03   0
  -6   4  -3   99.90    1.78   0
  -5  -5  -9   12.24    2.15   0
  -5  -1  -7   18.15    2.24   0
  -4  -8 -10    9.96    1.69   0
  -4  -3  -8  245.19    2.60   0
  -4  -1  11   42.77    2.44   0
  -4   0  -6  767.97    4.09   0
  -4   3  -3  393.45    3.39   0
  -3  -9 -10   23.14    2.19   0
  -3  -6  -9  309.17    2.94   0
  -3  -4  -8   15.50    2.10   0
  -3  -1  10    2.13    2.15   0
  -3   3  -2  504.86    3.77   0
  -3   4   2   69.55    2.63   0
  -2  -9  13   -0.29    2.16   0
  -2  -5  -8  114.86    2.22   0
  -2   0   8   22.38    1.88   0
  -2   2  -2   16.96    1.40   0
  -1 -13 -10   44.00    2.54   0
  -1  -9  12    8.29    2.03   0
  -1  -3  -6  182.96    2.96   0
  -1  -3   9  250.44    3.06   0
   0 -10  11   23.76    1.85   0
   0  -4   8    4.90    1.20   0
   0  -1   5   43.63    2.31   0
   1 -16  -9  121.75    4.15   0
   1 -15  11    1.76    2.54   0
   1 -11  10    0.79    2.10   0
   1  -4   6  536.02    3.87   0
   2 -17  -8    8.31    4.34   0
   2 -14   9   17.46    1.70   0
   2 -13   9   -0.17    2.18   0
   2  -7   6  166.16    2.57   0
   2  -6   5   57.72    1.66   0
   3 -22  -7   -0.34    3.38   0
   3 -21  -7    9.28    3.08   0
   3 -20  -7   -0.31    3.45   0
   3 -19   8    1.71    1.83   0
   3 -18   8   34.70    2.53   0
   3 -17   8   -0.64    2.16   0
   3 -14   7   56.53    1.86   0
   3 -11   6    7.69    1.73   0
   3 -10  -4  103.55    3.50   0
   3 -10   5   14.87    1.43   0
   3  -8  -2  654.73    5.69   0
   3  -8   3    3.49    1.27   0
   4 -17   5    2.98    1.48   0
   4 -16  -4   50.94    2.43   0
   4 -16   5  172.39    2.79   0
   4 -14   4   22.05    2.08   0
   4 -13   3    6.44    1.37   0
   4 -12  -1    0.22    1.25   0
   4 -12   2   29.18    1.89   0
 -12   4   0   -1.21    2.41   0
 -12   5   2   21.26    1.92   0
 -12   5   3    7.77    2.45   0
 -12   5   4   11.73    2.58   0
 -12   5   5   11.10    2.61   0
 -11   4  -1   83.85    2.70   0
 -11   5   1   61.00    2.47   0
 -11   5   7    1.84    1.97   0
 -10   1  -5    0.11    1.77   0
 -10   2  -4   -1.25    2.34   0
 -10   3  -3   67.80    2.43   0
 -10   4  -2   22.34    1.76   0
 -10   4   9   90.29    3.85   0
 -10   6   3   56.15    2.18   0
 -10   6   4    2.32    1.91   0
  -9   0  -6   53.93    2.16   0
  -9   4   9    0.28    2.97   0
  -9   5  -1  212.66    2.42   0
  -9   6   2  100.34    2.45   0
  -9   6   5    6.41    2.18   0
  -8  -3  -8   -3.07    1.73   0
  -8  -1  -7   36.65    1.74   0
  -8   3  -4  142.86    2.00   0
  -8   5  -1   29.27    2.08   0
  -8   6   1   -2.40    1.46   0
  -8   6   5  180.64    3.26   0
  -7  -5  -9   -2.14    1.78   0
  -7  -3  -8    0.71    2.13   0
  -7  -1  -7  128.59    2.46   0
  -7   2  -5  135.63    2.08   0
  -7   3  -4   13.75    1.50   0
  -7   5  -1    3.53    1.83   0
  -7   6   2   49.24    2.07   0
  -7   6   3  201.75    2.96   0
  -7   6   4  161.01    2.98   0
  -6  -8 -10   15.76    2.55   0
  -6  -5  -9  113.07    2.18   0
  -6  -3  -8   22.03    2.27   0
  -6  -2  13   89.85    3.36   0
  -6  -1  -7    7.28    1.36   0
  -6   5  -1   33.72    1.51   0
  -5  -8 -10  115.20    2.48   0
  -5  -3  -8   39.76    1.74   0
  -5  -3  13    6.45    2.41   0
  -5   4  -2   91.52    2.19   0
  -5   5   0   33.16    1.66   0
  -4  -6  -9   97.21    2.67   0
  -4   1  -5    5.85    1.17   0
  -4   2  -4  180.32    2.33   0
  -4   4  -1   14.92    1.93   0
  -3  -6  13   15.51    2.22   0
  -3  -4  12   19.00    2.19   0
  -3  -1  -6   36.31    1.93   0
  -2 -11 -10   46.80    2.07   0
  -2  -8  -9   -1.39    2.07   0
  -2  -6  12   22.45    2.33   0
  -2  -4  11  148.87    2.85   0
  -2  -2  -6   42.36    2.03   0
  -2  -1   9   70.53    2.39   0
  -2   1   7   23.89    2.08   0
  -1  -7  -8  383.89    3.88   0
  -1  -6  11   -0.37    2.03   0
  -1  -2  -5    0.52    1.92   0
  -1   0  -3   -1.53    1.71   0
   0 -18 -10    1.89    2.54   0
   0 -13  12   11.98    1.91   0
   0 -12  -9    1.72    2.13   0
   0 -12  12   13.83    2.18   0
   0  -9  -8  234.06    3.58   0
   0  -9  11   17.90    2.31   0
   0  -7  10   25.07    1.64   0
   0  -5   9   74.89    2.32   0
   0   0   3    0.74    2.07   0
   1 -14  11    9.08    1.90   0
   1 -10  10    2.49    2.04   0
   1  -9  -7  202.02    3.87   0
   1  -8   9    1.15    1.54   0
   1  -7  -6   73.80    2.81   0
   1  -6   8   62.33    2.22   0
   1  -5   7    1.91    1.25   0
   1  -3   5  246.61    2.81   0
   1  -2   3   35.00    1.86   0
   2 -17  10   -2.04    1.85   0
   2 -16  10   -1.79    2.49   0
   2 -12   9  248.69    3.02   0
   2 -10   8   95.64    1.95   0
   2  -8   7   53.49    1.75   0
   2  -5   4 1249.33    5.49   0
   2  -4   0   67.25    2.65   0
   2  -4   1  321.32    3.68   0
   2  -4   2  169.61    2.79   0
   3 -19  -7   13.63    3.71   0
   3 -16   8   -0.42    1.66   0
   3 -15   8   -0.80    2.05   0
   3 -14  -6   10.27    3.37   0
   3 -13   7   -3.57    1.29   0
   3  -9   5   62.67    2.01   0
   3  -8   4   41.40    1.87   0
   3  -7   0  288.74    3.31   0
   3  -7   1   51.80    1.74   0
   3  -7   2 1696.49    6.69   0
   4 -23  -5    2.47    2.42   0
   4 -22  -5   44.70    2.80   0
   4 -21  -5   -1.15    2.27   0
   4 -21   6    3.05    1.80   0
   4 -20  -5    7.59    2.27   0
   4 -20   6   62.90    2.24   0
   4 -19  -5   24.93    2.56   0
   4 -19   6   -0.76    1.85   0
   4 -15  -4    4.21    2.31   0
   4 -15   5  127.60    2.07   0
   4 -13   4   18.46    2.01   0
   4 -12  -2   92.57    2.40   0
   4 -12   3    7.04    1.84   0
   4 -11   0   95.62    2.28   0
   4 -11   1  508.83    3.85   0
   5 -23   0    8.35    2.28   0
   5 -23   1   49.60    2.48   0
   5 -22   0    3.45    2.49   0
   5 -22   1    4.37    2.43   0
   5 -21   0   52.55    2.52   0
   5 -21   1   15.83    2.35   0
   5 -20   0    1.89    2.32   0
   5 -20   1   -1.18    2.04   0
 -12   3  -1   13.52    2.20   0
 -11   1  -4   17.56    2.15   0
 -11   2  -3    0.00    2.40   0
 -11   3  -2   79.71    2.54   0
 -11   5   2   10.80    2.28   0
 -11   5   6    3.88    2.46   0
 -10  -1  -6   98.66    2.21   0
 -10   5   0   -2.81    1.57   0
 -10   5   7   11.65    2.55   0
  -9  -2  -7   10.32    1.82   0
  -9   1  -5   58.58    1.91   0
  -9   2  -4   16.37    2.18   0
  -9   3  -3   80.24    2.54   0
  -9   4  -2   15.82    1.92   0
  -9   6   3   40.79    1.81   0
  -9   6   4    6.55    1.77   0
  -8   0  -6  116.01    2.05   0
  -8   6   2   15.80    1.57   0
  -8   6   3  147.33    2.74   0
  -8   6   4   60.79    2.55   0
  -7  -6  -9    8.87    2.48   0
  -7  -1  13   20.16    3.06   0
  -7   0  -6   35.22    1.91   0
  -6   0  -6  536.74    3.68   0
  -6   4  -2  273.96    2.91   0
  -6   5   6  237.11    4.70   0
  -5  -9 -10   13.62    2.44   0
  -5  -6  -9    5.27    2.10   0
  -5  -1  12    2.84    2.32   0
  -5   0  -6   59.48    1.76   0
  -5   1  -5    7.48    1.76   0
  -5   3  -3  830.99    4.22   0
  -5   5   1  423.18    3.94   0
  -4  -9 -10   51.61    1.94   0
  -4  -4  -8   -0.57    1.82   0
  -4  -4  13   21.54    2.49   0
  -4  -2  -7    2.95    1.38   0
  -3 -10 -10   24.97    1.76   0
  -3  -7  -9   18.20    1.44   0
  -3  -2  11   37.89    2.18   0
  -3   0  -5   -2.43    1.64   0
  -3   1  -4    3.55    1.86   0
  -3   2  -3  305.04    3.00   0
  -2 -12 -10    1.46    2.22   0
  -2  -8  13   12.91    2.40   0
  -2  -2  10    2.01    2.05   0
  -2  -1  -5   16.30    2.01   0
  -2   1  -3  332.55    3.54   0
  -1 -14 -10  118.52    3.08   0
  -1 -10  -9  448.64    4.18   0
  -1  -8  12   38.47    2.43   0
  -1  -5  -7    0.24    1.32   0
  -1  -4  10    5.53    1.46   0
  -1  -1  -4  221.96    3.15   0
   0 -11  12   98.32    2.55   0
   0  -5  -6  691.05    5.53   0
   1 -17  -9    1.77    3.03   0
   1 -13  11   11.73    1.86   0
   1 -12  -8   23.11    2.48   0
   1 -12  11    8.11    2.09   0
   2 -15  10   -2.78    1.74   0
   2 -14  10    8.55    2.06   0
   2 -11   9   -3.36    2.24   0
   2  -9   8    1.40    2.10   0
   3 -18   9  113.48    2.69   0
   3 -14   8  114.73    2.52   0
   3 -12   7   45.86    1.65   0
   3 -10   6   14.55    1.46   0
   3  -7  -1    8.34    2.04   0
   3  -7   3 1046.08    5.06   0
   4 -18  -5   -1.06    2.37   0
   4 -17   6    3.04    1.65   0
   4 -16   6   91.44    2.50   0
   4 -14   5   79.80    1.87   0
   4 -13  -3   -0.57    1.80   0
   4 -12   4   14.09    2.06   0
   4 -11  -1  720.15    4.87   0
   4 -11   2    8.48    1.32   0
   4 -11   3  547.02    3.54   0
   5 -23  -1    9.99    1.90   0
   5 -23   2   15.78    2.01   0
   5 -22  -1   47.96    2.21   0
   5 -22   2   -0.81    1.83   0
   5 -22   3   28.47    2.33   0
   5 -21  -1    7.96    1.77   0
   5 -21   2   35.66    2.00   0
   5 -21   3    3.70    2.10   0
   5 -20  -1   40.42    1.98   0
   5 -20   2    4.92    1.60   0
   5 -19  -1   14.23    2.31   0
   5 -19   0    9.92    1.69   0
   5 -19   1   55.92    1.99   0
   5 -19   2   49.51    2.50   0
   5 -18  -1   -0.47    1.97   0
   5 -18   0   30.25    2.41   0
   5 -18   1   12.94    2.29   0
   5 -18   2    6.36    1.97   0
 -12   4   1   24.61    1.88   0
 -11   5   3   31.29    2.45   0
 -11   5   5    6.79    2.44   0
 -10   0  -5   -2.31    1.68   0
 -10   3  10    4.26    3.38   0
 -10   4  -1   32.17    1.73   0
 -10   5   1   -2.38    1.96   0
  -9  -1  -6   18.72    2.09   0
  -9   5   0  314.48    2.88   0
  -9   5   7    8.86    2.64   0
  -8  -4  -8   -4.71    1.71   0
  -8  -2  -7    0.65    1.65   0
  -8   1  -5   66.55    1.87   0
  -8   1  12    1.21    3.71   0
  -8   2  -4   59.99    2.14   0
  -8   3  -3   56.38    2.24   0
  -8   4  -2  569.37    3.57   0
  -8   5   0   61.85    2.28   0
  -8   5   7    9.10    2.55   0
  -7  -4  -8   14.91    2.19   0
  -7  -2  -7   35.69    2.34   0
  -7   1  -5   41.74    2.15   0
  -7   4  -2   46.36    1.73   0
  -7   5   0   55.65    1.97   0
  -6  -9 -10    0.35    1.90   0
  -6  -6  -9   34.70    1.86   0
  -6  -4  -8  132.98    2.66   0
  -6  -2  -7    2.77    1.92   0
  -6   0  12   21.86    2.97   0
  -6   1  -5   88.50    2.31   0
  -6   3  -3  204.90    2.56   0
  -6   5   0  101.40    1.94   0
  -5  -4  -8   56.74    1.93   0
  -5  -2  -7  388.48    3.09   0
  -5   2  -4   -0.54    1.35   0
  -5   5   4 1134.96    8.10   0
  -4 -10 -10   74.52    2.76   0
  -4  -7  -9  146.03    2.85   0
  -4  -2  12   22.73    2.29   0
  -4  -1  -6   38.37    1.89   0
  -3 -11 -10    3.73    2.36   0
  -3  -5  -8    1.52    1.50   0
  -3  -3  -7    2.65    1.22   0
  -3   3  -1  886.03    5.42   0
  -3   3   6    1.90    2.51   0
  -2  -6  -8   69.72    1.93   0
  -2  -5  12    8.64    2.10   0
  -2  -4  -7  993.60    4.96   0
  -2   0  -4  549.11    4.06   0
  -1 -15 -10    3.56    2.32   0
  -1 -10  13   -0.69    2.52   0
  -1  -1   8   77.64    2.11   0
  -1   1  -1    1.23    2.72   0
  -1   1   5  130.14    3.25   0
   0 -13  -9   14.91    2.53   0
   0  -8  11    9.37    1.63   0
   0  -7  -7  249.25    3.50   0
   0  -6  10   82.89    1.92   0
   0  -3   8   15.78    1.80   0
   0  -2   7   44.18    1.62   0
   1  -9  10   79.17    2.23   0
   1  -7   9  201.00    2.44   0
   1  -4   7    8.62    1.75   0
   1  -2   4   44.88    1.70   0
   2 -13  10   49.41    2.35   0
   2 -10  -6    0.86    2.73   0
   2  -7   7  189.35    2.28   0
   2  -6   6   86.35    1.78   0
   2  -5   5  625.07    3.87   0
   2  -4   3   35.46    1.53   0
   3 -17   9   14.66    1.89   0
   3 -16   9    7.23    2.11   0
   3 -13   8   -2.27    2.14   0
   3 -11   7    9.38    1.48   0
   3  -9   6  253.04    2.77   0
   3  -8   5  165.50    2.41   0
   4 -20   7    3.84    1.81   0
   4 -19   7    0.38    1.80   0
   4 -18   7    1.54    2.36   0
   4 -15   6   17.07    1.75   0
   4 -13   5   -0.06    1.47   0
   4 -10   0   33.18    1.98   0
   4 -10   1   -3.69    1.78   0
   4 -10   2    1.01    1.74   0
   5 -23  -2   -2.72    2.51   0
   5 -22  -2   19.56    1.92   0
   5 -22   4    5.14    2.19   0
   5 -21  -2    5.10    1.67   0
   5 -21   4    1.62    2.13   0
   5 -20  -2    3.54    2.27   0
   5 -20   3   26.35    1.78   0
   5 -19  -2    2.87    2.18   0
   5 -19   3   36.36    1.80   0
   5 -18   3   -1.55    2.14   0
   5 -17  -1  227.09    3.13   0
   5 -17   0   84.28    2.07   0
   5 -17   1  165.51    2.30   0
   5 -17   2    8.96    1.64   0
   5 -16   0  107.19    2.39   0
   5 -16   1    9.05    1.90   0
 -12   3   0   45.85    2.08   0
 -12   4   2   26.68    1.94   0
 -11   0  -4  107.41    2.58   0
 -11   3  -1   15.85    2.11   0
 -11   4   8   29.63    2.77   0
 -11   5   4   11.29    1.75   0
 -10  -2  -6    4.71    1.78   0
 -10   1  -4   94.86    2.04   0
 -10   2  -3   25.98    1.72   0
 -10   3  -2   43.12    1.82   0
 -10   5   2   -2.66    2.17   0
 -10   5   6   51.13    2.61   0
  -9  -3  -7  115.33    2.31   0
  -9   0  -5    3.12    2.20   0
  -9   4  -1  925.94    4.51   0
  -9   5   1  115.73    2.45   0
  -8  -5  -8  222.97    3.18   0
  -8  -1  -6  100.90    2.27   0
  -7  -7  -9   82.47    2.55   0
  -7   2  -4   -3.00    1.32   0
  -7   3  -3    9.30    1.45   0
  -6  -7  -9   10.99    2.29   0
  -6   2  -4    7.75    1.37   0
  -6   5   1   98.35    2.35   0
  -5 -10 -10   -0.50    1.88   0
  -5  -7  -9    4.62    2.17   0
  -5  -1  -6    6.75    1.85   0
  -5   4  -1   84.50    1.93   0
  -5   5   2  318.07    3.52   0
  -5   5   3   35.13    2.24   0
  -4  -5  -8   74.47    2.32   0
  -4  -3  -7  189.76    2.72   0
  -4   0  -5    0.95    1.59   0
  -4   1  10   33.12    2.64   0
  -4   3  -2  795.46    4.45   0
  -4   4   0    0.02    1.42   0
  -3  -8  -9   -0.60    1.87   0
  -3  -5  13    2.55    1.67   0
  -3  -3  12   65.66    2.48   0
  -2 -13 -10   37.52    2.44   0
  -2  -9  -9    6.50    1.46   0
  -2  -7  13   40.19    2.01   0
  -2  -3  11   20.53    2.01   0
  -2   2  -1  855.45    6.24   0
  -1 -11  -9   23.12    2.23   0
  -1  -8  -8  491.87    4.38   0
  -1  -5  11  131.45    2.48   0
  -1  -2   9   13.01    1.51   0
  -1   0   7    2.16    1.91   0
   0 -10  12   35.00    2.02   0
   0  -4   9  146.19    2.33   0
   0  -1   6   79.83    2.56   0
   0   0   4 3368.16   11.71   0
   1 -18  -9    0.96    3.12   0
   1 -11  11   24.00    1.76   0
   1  -8  10   81.47    2.47   0
   1  -5   8  191.89    2.35   0
   1  -3   6  179.41    2.46   0
   2 -12  10   -0.10    2.28   0
   2 -10   9   24.81    1.78   0
   2  -8   8   54.53    1.75   0
   2  -4   4   41.63    2.13   0
   3 -18  -7   33.36    5.14   0
   3 -15   9   -2.61    1.79   0
   3 -12   8   42.24    2.28   0
   3 -10   7    4.69    2.10   0
   3  -7   4  906.00    4.55   0
   3  -6   1    0.93    1.94   0
   3  -6   2    3.91    1.74   0
   4 -17  -5   96.71    3.07   0
   4 -17   7    1.84    1.76   0
   4 -16   7   91.47    2.57   0
   4 -14  -4   50.67    2.44   0
   4 -14   6   55.93    1.83   0
   4 -13   6   -1.60    1.87   0
   4 -12  -3  280.40    3.94   0
   4 -12   5  133.75    2.13   0
   4 -11  -2   96.92    2.49   0
   4 -11   4   83.16    1.86   0
   4 -10   3  340.50    3.07   0
   5 -22  -3    1.92    2.10   0
   5 -20   4   10.06    1.93   0
   5 -19   4   26.70    1.77   0
   5 -18  -2   17.59    2.32   0
   5 -18   4   58.89    2.43   0
   5 -17   3  106.51    2.17   0
   5 -16  -1   18.58    2.13   0
   5 -16   2   13.83    1.57   0
   5 -16   3   12.09    2.13   0
   5 -15   0   59.47    2.29   0
   5 -15   1   30.99    2.13   0
   5 -15   2   63.42    2.18   0
 -12   2  -1   38.11    2.04   0
 -12   3   1    8.04    2.44   0
 -12   4   3   21.46    1.89   0
 -12   4   4   27.99    2.33   0
 -12   4   5   15.94    2.54   0
 -12   4   6    2.76    2.20   0
 -11   1  -3   19.34    1.75   0
 -11   2  -2   -0.48    1.87   0
 -11   4   1    8.06    1.66   0
 -10  -1  -5   11.56    1.75   0
 -10   4   0    3.43    1.68   0
 -10   5   3   55.44    2.27   0
 -10   5   4   30.57    2.39   0
 -10   5   5   50.98    2.52   0
  -9  -4  -7    1.60    2.45   0
  -9  -2  -6   12.41    2.00   0
  -9   1  -4   63.99    1.85   0
  -9   2  -3   23.70    2.28   0
  -9   3  -2   15.71    1.43   0
  -9   5   2   78.73    2.34   0
  -8  -3  -7   -1.41    1.55   0
  -8   0  -5   -3.08    2.10   0
  -8   4  -1   91.60    2.16   0
  -8   5   1   55.89    2.13   0
  -7  -8  -9   -1.72    2.43   0
  -7  -5  -8    7.01    1.91   0
  -7  -3  -7  344.61    3.18   0
  -7  -1  -6   -0.40    1.34   0
  -7   4  -1  300.41    2.96   0
  -7   5   1   70.91    2.06   0
  -6  -5  -8  154.33    2.67   0
  -6  -1  -6   55.26    1.74   0
  -6   4  -1   36.34    1.88   0
  -5 -11 -10   57.36    2.71   0
  -5  -5  -8   39.04    2.17   0
  -5  -3  -7   76.96    2.37   0
  -5  -2  13   -0.79    2.64   0
  -4 -11 -10   17.12    1.85   0
  -4  -8  -9   32.37    2.36   0
  -4  -3  13   35.00    2.38   0
  -4   0  11   -0.23    2.57   0
  -4   1  -4 2183.12    6.83   0
  -4   2  -3  313.22    2.91   0
  -4   2   9  240.41    4.24   0
  -3 -12 -10   16.28    2.22   0
  -3  -6  -8  132.33    2.83   0
  -3  -2  -6   34.15    1.45   0
  -3   0  10  123.62    3.05   0
  -3   1   9    0.35    2.05   0
  -2  -7  -8  303.61    3.37   0
  -2  -3  -6  425.91    3.51   0
  -2   2   6   16.96    2.18   0
  -1 -16 -10    2.48    2.31   0
  -1  -9  13   79.70    2.29   0
  -1  -6  -7   18.84    1.91   0
  -1  -4  -6  519.45    4.13   0
  -1  -3  10   55.89    1.94   0
   0 -10  -8   18.03    2.06   0
   0  -9  12   57.45    2.66   0
   0  -7  11   65.24    2.01   0
   0  -5  10   54.85    2.26   0
   0  -4  -5  195.91    3.46   0
   0  -1  -2 2404.86   14.76   0
   1 -10  11   -0.20    1.76   0
   1  -6   9    4.76    1.63   0
   1  -2  -1 2431.79   23.49   0
   1  -2   5   -1.22    1.93   0
   2 -14  11    1.65    2.19   0
   2 -11  10   55.37    2.54   0
   2  -9   9    4.63    1.87   0
   2  -6   7   22.16    1.86   0
   2  -5   6  797.44    4.27   0
   2  -4  -1   32.19    2.40   0
   3 -14   9   34.00    1.88   0
   3 -11   8    5.87    2.01   0
   3  -8   6  215.25    2.63   0
   3  -7   5  188.38    2.68   0
   3  -6   0  925.13    5.67   0
   3  -6   3  118.36    2.52   0
   4 -18   8    2.69    2.60   0
   4 -15   7    1.71    1.66   0
   4 -14   7  127.95    2.55   0
   4 -11   5  125.52    2.46   0
   4 -10  -1  102.44    2.14   0
   4 -10   4    0.46    1.85   0
   4  -9   1  497.68    3.88   0
   4  -9   2   34.07    1.78   0
   5 -23  -3    0.94    1.78   0
   5 -21  -3    1.34    1.69   0
   5 -21   5    3.71    1.88   0
   5 -20  -3    6.40    2.41   0
   5 -20   5   20.19    1.86   0
   5 -19  -3    7.20    1.96   0
   5 -19   5   14.18    2.53   0
   5 -18   5  121.12    2.51   0
   5 -17  -2  320.74    3.41   0
   5 -17   4    2.85    1.54   0
   5 -16   4    1.22    2.19   0
   5 -15  -1   28.20    2.35   0
   5 -15   3    2.71    1.93   0
   5 -14   1   72.94    2.26   0
   5 -14   2    5.48    1.87   0
 -12   2   0   11.64    2.56   0
 -11  -1  -4   25.26    2.26   0
 -11   3   0   21.39    2.10   0
 -11   4   2   -0.14    1.99   0
 -11   4   7   13.07    2.57   0
 -10  -3  -6   21.87    1.88   0
 -10   0  -4   23.14    1.69   0
 -10   1  -3   42.25    2.36   0
 -10   2  -2    4.78    2.17   0
 -10   3  -1   97.18    2.09   0
 -10   4   1   32.99    2.36   0
 -10   4   8   43.10    3.10   0
  -9  -1  -5   66.70    2.47   0
  -9   3  10    2.45    3.21   0
  -9   4   0   21.35    2.10   0
  -9   5   3    1.14    1.93   0
  -9   5   6   -0.16    2.32   0
  -8  -6  -8    0.70    1.71   0
  -8  -4  -7   16.93    2.22   0
  -8  -2  -6   71.10    2.44   0
  -8   1  -4   68.80    1.74   0
  -8   2  -3   52.71    2.16   0
  -8   3  -2   24.78    1.80   0
  -8   5   2   36.57    2.18   0
  -7   0  -5   -2.89    1.38   0
  -7   2  11   46.80    4.78   0
  -7   3  -2    7.70    1.87   0
  -7   5   6   21.24    2.39   0
  -6  -8  -9    3.04    2.02   0
  -6  -3  -7   32.70    1.51   0
  -6  -1  13   71.50    3.24   0
  -6   0  -5   -1.51    1.72   0
  -6   3  -2   74.73    2.21   0
  -6   5   2  207.13    3.02   0
  -6   5   5   23.60    2.34   0
  -5 -12 -10   71.18    2.81   0
  -5  -8  -9   17.43    2.05   0
  -5   0  -5    1.51    1.22   0
  -5   1  -4    9.68    1.90   0
  -5   1  11    9.42    2.64   0
  -5   2  -3  504.15    3.48   0
  -5   2  10    0.47    2.50   0
  -5   3  -2   23.37    1.43   0
  -4 -12 -10   49.39    2.35   0
  -4  -2  -6   31.81    1.95   0
  -4   4   1   68.09    2.40   0
  -3 -13 -10    7.43    2.56   0
  -3  -9  -9   47.96    2.24   0
  -3  -4  -7  125.89    2.02   0
  -3  -4  13   30.15    2.27   0
  -3  -1  -5  687.47    4.29   0
  -3  -1  11    6.75    1.93   0
  -3   2  -2  186.75    2.58   0
  -3   2   8   17.41    2.33   0
  -2 -14 -10    9.70    1.71   0
  -2 -10  -9   24.09    1.99   0
  -2  -6  13    0.80    1.85   0
  -2  -5  -7  294.58    3.12   0
  -2  -4  12   20.00    2.24   0
  -2  -1  10   61.66    2.61   0
  -2   0   9   -0.39    2.04   0
  -1 -17 -10    8.11    2.56   0
  -1  -8  13   -5.08    2.45   0
  -1  -6  12    3.69    1.64   0
  -1  -4  11   29.00    2.28   0
   0 -14  -9    0.15    2.02   0
   1 -19  -9   12.25    3.27   0
   1 -13  -8  280.74    4.74   0
   1 -12  12   28.65    1.91   0
   1  -9  11  101.83    2.72   0
   1  -7  10    1.43    1.96   0
   2 -13  11    3.37    2.46   0
   2  -7   8  305.46    2.75   0
   2  -4   5    4.61    1.80   0
   3 -16  10   -2.73    1.80   0
   3 -13   9    2.98    1.56   0
   3 -11  -5  469.05    8.47   0
   3 -10   8   56.11    2.06   0
   3  -9   7    6.78    1.36   0
   3  -8  -3  159.63    3.68   0
   3  -7  -2  239.40    3.94   0
   3  -6   4  520.01    3.77   0
   4 -17   8   -3.18    1.84   0
   4 -16  -5  106.65    3.47   0
   4 -16   8   45.69    2.67   0
   4 -13   7    7.99    2.10   0
   4 -12   6    1.84    1.44   0
   4  -9   0   21.41    1.99   0
   4  -9   3   69.78    2.21   0
   5 -20   6   -0.85    2.64   0
   5 -19   6   10.64    2.24   0
   5 -18  -3   -1.53    2.15   0
   5 -17   5   18.43    1.78   0
   5 -16  -2    1.66    1.38   0
   5 -16   5    6.24    1.86   0
   5 -15   4   11.64    2.07   0
   5 -14   0   10.61    1.54   0
   5 -14   3    2.73    1.99   0
 -12   1  -1   38.43    1.98   0
 -12   3   2   31.55    2.06   0
 -11   0  -3   -4.27    1.75   0
 -11   1  -2  129.02    2.30   0
 -11   2  -1    8.04    1.68   0
 -11   4   3   48.09    2.22   0
 -11   4   6   61.06    2.76   0
 -10  -4  -6   14.17    2.56   0
 -10  -2  -5   -1.05    1.72   0
  -9  -5  -7    0.64    1.70   0
  -9  -3  -6   64.17    2.37   0
  -9   0  -4   -1.73    2.17   0
  -9   3  -1    6.36    2.01   0
  -9   5   4   -0.63    2.11   0
  -9   5   5    4.33    1.92   0
  -8  -7  -8   34.65    2.53   0
  -8   4   0  973.58    4.76   0
  -8   5   3   98.46    2.46   0
  -8   5   6   40.45    2.41   0
  -7  -9  -9    6.68    1.82   0
  -7  -6  -8    3.22    1.61   0
  -7  -4  -7   84.05    2.42   0
  -7  -2  -6   -3.84    1.66   0
  -7   1  -4   27.79    1.47   0
  -7   1  12   67.30    4.34   0
  -7   2  -3  394.43    2.97   0
  -7   5   2   51.77    1.67   0
  -6  -9  -9  118.92    2.88   0
  -6  -6  -8   69.89    2.48   0
  -6  -2  -6    5.92    2.13   0
  -6   1  -4   45.57    1.64   0
  -6   2  -3   18.74    1.46   0
  -6   5   3  226.21    3.26   0
  -6   5   4  233.59    3.57   0
  -5  -6  -8    4.11    2.10   0
  -5  -2  -6  119.95    2.49   0
  -5   4   0   54.20    1.78   0
  -4 -13 -10    7.82    2.54   0
  -4  -9  -9   61.74    2.41   0
  -4  -6  -8  406.34    3.18   0
  -4  -4  -7   71.84    2.28   0
  -4  -1  12   53.35    2.61   0
  -4   3  -1   27.11    2.04   0
  -3   0  -4  432.02    3.47   0
  -3   1  -3   38.27    1.65   0
  -3   3   0  544.55    4.62   0
  -2 -15 -10    1.18    2.18   0
  -2  -2  -5  212.93    2.99   0
  -2  -2  11   25.01    2.12   0
  -2   1   8  199.88    3.24   0
  -1 -12  -9    3.58    2.21   0
  -1  -3  -5  265.53    3.40   0
  -1   1   6 1317.12    7.44   0
   0 -10  13    1.39    2.13   0
   0  -8  -7    6.27    1.73   0
   0  -8  12    2.23    1.60   0
   0  -6  11   -3.08    1.69   0
   0  -3  -4  994.94    7.10   0
   0  -3   9   59.99    1.75   0
   0  -2   8   89.61    1.97   0
   0  -1   7   69.78    2.26   0
   0   0   5    1.56    1.18   0
   1 -11  12    3.92    1.76   0
   1 -10  -7  112.05    3.24   0
   1  -6  -5    3.69    2.33   0
   1  -5   9    0.06    1.98   0
   1  -4   8  507.66    3.51   0
   1  -3   7  300.36    2.77   0
   2 -13  -7    0.81    3.43   0
   2 -12  11   21.93    2.44   0
   2 -10  10   16.62    1.70   0
   2  -8   9    5.99    1.40   0
   2  -3   2  830.15    5.35   0
   2  -3   3  202.38    2.95   0
   3 -15  10    0.13    1.82   0
   3 -14  10   82.18    2.64   0
   3 -12   9   11.39    1.57   0
   3  -8   7    7.73    1.94   0
   3  -7   6  113.51    2.21   0
   4 -22  -6    6.96    3.31   0
   4 -15   8   16.28    1.73   0
   4 -13  -4  258.05    4.01   0
   4 -12   7  203.21    2.72   0
   4 -11   6   24.20    1.58   0
   4 -10  -2    3.41    1.77   0
   4 -10   5  698.99    3.78   0
   4  -9   4    0.08    1.70   0
   5 -18   6   94.64    2.33   0
   5 -17  -3   45.08    2.19   0
   5 -17   6   22.04    2.34   0
   5 -15  -2   36.93    2.50   0
   5 -15   5   10.75    2.30   0
   5 -14  -1  305.78    3.18   0
   5 -14   4  107.54    1.94   0
   5 -13   0  699.01    4.49   0
   5 -13   1    8.07    1.43   0
   5 -13   2  134.07    2.10   0
   5 -13   3   -1.41    2.09   0
 -12   2   1   23.30    2.23   0
 -12   3   3   41.24    2.01   0
 -11  -2  -4   -1.59    1.75   0
 -11   3   1    3.42    1.63   0
 -11   4   4   36.53    1.96   0
 -11   4   5    2.49    2.00   0
 -10  -1  -4   84.68    2.06   0
 -10   3   0  134.86    2.19   0
 -10   4   2   83.82    2.43   0
  -9  -2  -5   20.13    2.30   0
  -9   1  -3  136.69    2.20   0
  -9   2  -2   11.73    1.35   0
  -9   4   1  185.92    2.60   0
  -8  -5  -7  131.19    2.66   0
  -8  -3  -6   30.05    2.21   0
  -8  -1  -5   67.83    1.85   0
  -8   5   4  246.61    3.29   0
  -8   5   5   85.29    2.85   0
  -7  -7  -8  127.69    2.89   0
  -7  -1  -5   46.85    2.16   0
  -7   4   0  855.95    4.28   0
  -7   5   3   -0.19    1.66   0
  -7   5   4    2.19    1.83   0
  -7   5   5    2.80    2.01   0
  -6  -4  -7   21.42    1.45   0
  -6   4   0  134.00    2.11   0
  -5  -9  -9   17.00    1.66   0
  -5  -4  -7   39.29    1.61   0
  -5   0  12  161.46    3.63   0
  -4  -1  -5    6.86    1.53   0
  -4   4   2  541.28    5.23   0
  -3 -14 -10   69.87    2.24   0
  -3 -10  -9    4.20    2.00   0
  -3  -7  -8   29.54    1.77   0
  -3  -3  -6  218.87    2.79   0
  -3  -2  12   24.51    1.78   0
  -2 -16 -10    1.71    2.56   0
  -2 -11  -9   -3.95    2.31   0
  -2  -8  -8   52.40    2.31   0
  -2  -5  13    3.29    2.25   0
  -2  -1  -4 1093.16    5.77   0
  -2   1  -2 1799.92    7.84   0
  -1  -9  -8  170.28    2.72   0
  -1  -7  13   48.32    2.54   0
  -1  -5  12   47.82    2.42   0
  -1  -2  10   17.33    2.14   0
  -1  -1   9  207.20    3.04   0
  -1   0  -2 1082.94    7.66   0
   0 -15  -9   21.42    2.26   0
   0 -11  -8   35.59    2.69   0
   0  -7  12   82.71    2.39   0
   0  -6  -6    0.73    1.70   0
   0  -4  10    3.04    1.44   0
   0  -2  -3  292.04    4.60   0
   1 -20  -9   17.89    3.15   0
   1 -10  12   20.33    2.49   0
   1  -8  11   31.99    1.75   0
   1  -6  10   80.38    2.37   0
   1  -2   6    5.75    1.43   0
   1  -1   2  903.21    6.89   0
   1  -1   3  104.79    2.36   0
   2 -18  -8   56.26    4.80   0
   2 -11  11   -0.60    2.38   0
   2  -9  10   -2.25    1.55   0
   2  -7   9   -0.26    1.75   0
   2  -6   8   68.38    1.79   0
   2  -5   7  306.68    2.72   0
   2  -4   6   11.46    1.77   0
   2  -3   1  786.59    5.90   0
   2  -3   4   58.40    2.27   0
   3 -13  10    4.90    2.54   0
   3  -9   8    6.04    1.47   0
   3  -6  -1   -0.41    1.57   0
   3  -6   5    2.38    1.32   0
   3  -5   2  488.35    4.02   0
   4 -21  -6    1.54    2.74   0
   4 -16   9   11.24    2.48   0
   4 -14   8   88.61    2.02   0
   4 -13   8   10.79    1.95   0
   4 -11  -3  494.77    4.90   0
   4 -10   6   12.97    2.14   0
   4  -9  -1  154.83    2.57   0
   4  -9   5    4.50    1.82   0
   4  -8   1    4.79    1.85   0
   4  -8   2  289.61    2.84   0
   4  -8   3  114.59    2.20   0
   5 -23  -4   -0.49    2.61   0
   5 -22  -4   30.14    2.56   0
   5 -21  -4  150.38    3.45   0
   5 -20  -4    8.03    2.47   0
   5 -18   7  136.62    2.83   0
   5 -16   6    8.49    1.64   0
   5 -14   5   13.31    2.27   0
   5 -13  -1   23.31    2.04   0
   5 -13   4    0.83    1.47   0
   5 -12   1    0.70    1.74   0
   5 -12   2  319.33    3.23   0
   5 -12   3   10.86    1.75   0
   6 -22   0   19.75    2.32   0
   6 -22   1    8.23    2.57   0
   6 -22   2    4.69    2.56   0
   6 -21   1    2.77    2.42   0
   6 -21   2    4.67    2.49   0
   6 -20   1   39.04    2.34   0
   6 -20   2   48.73    2.38   0
 -12   0  -1   -2.77    2.57   0
 -12   1   0    3.47    1.84   0
 -12   3   4   12.70    1.80   0
 -12   3   5  100.42    2.76   0
 -12   3   6   12.55    2.33   0
 -11  -1  -3   18.22    1.78   0
 -11   0  -2  149.10    2.89   0
 -11   1  -1   30.37    2.27   0
 -11   2   0   15.61    1.72   0
 -11   3   2    9.22    2.25   0
 -10  -3  -5   11.83    1.75   0
 -10   0  -3    0.30    1.63   0
 -10   1  -2   10.67    1.66   0
 -10   2  -1   14.50    1.62   0
 -10   4   3    7.41    2.19   0
 -10   4   7  135.67    3.16   0
  -9  -6  -7    1.28    1.86   0
  -9  -4  -6    4.13    1.80   0
  -9   4   8   59.53    2.69   0
  -8  -8  -8   20.27    1.91   0
  -8   0  -4    9.78    1.45   0
  -8   1  -3    2.77    1.84   0
  -8   2  -2    9.25    1.90   0
  -8   3  -1  190.15    2.32   0
  -8   4   1   33.27    2.09   0
  -7  -5  -7    5.45    2.15   0
  -7  -3  -6   22.57    1.91   0
  -7   0  -4   -2.97    1.87   0
  -7   3  -1  837.64    4.26   0
  -6 -10  -9    4.67    2.10   0
  -6  -7  -8   35.80    2.17   0
  -6  -1  -5   90.95    1.84   0
  -5 -10  -9   13.91    2.31   0
  -5  -7  -8  207.33    3.03   0
  -5  -1  -5    7.58    1.35   0
  -5   3  -1  711.36    4.24   0
  -5   3   9  174.06    5.89   0
  -5   4   1  346.12    3.69   0
  -4 -14 -10    2.24    1.93   0
  -4 -10  -9  201.34    2.86   0
  -4  -7  -8   39.00    2.08   0
  -4  -2  13   65.91    2.83   0
  -4   0  -4 1273.03    5.47   0
  -4   1  -3   26.79    1.93   0
  -4   2  -2  183.55    2.48   0
  -4   3   8   24.23    2.72   0
  -4   4   5  223.06    6.29   0
  -3 -15 -10    1.32    2.21   0
  -3  -5  -7  292.45    2.82   0
  -3  -5  14    7.62    2.57   0
  -3  -3  13   14.17    2.22   0
  -2  -6  -7   21.39    1.88   0
  -2  -4  -6   10.25    1.80   0
  -2  -3  12  100.79    2.65   0
  -2   0  -3    0.46    1.10   0
  -1 -13  -9   31.40    2.34   0
  -1  -7  -7  209.31    2.93   0
  -1  -5  -6  164.83    2.84   0
  -1  -3  11   44.13    2.18   0
  -1  -2  -4   47.43    1.79   0
  -1  -1  -3  120.31    2.82   0
  -1   0   8  832.20    5.10   0
   0  -9  13   12.98    1.92   0
   0  -5  11    4.26    1.70   0
   1  -9  12   27.38    2.36   0
   1  -8  -6  105.14    3.26   0
   1  -7  11    1.23    1.99   0
   1  -1   4  215.33    2.91   0
   2 -10  11  137.34    2.67   0
   2  -8  10    4.01    1.94   0
   3 -12  10   24.94    2.50   0
   3 -10   9    3.42    1.62   0
   3  -9  -4   69.74    3.36   0
   3  -7   7   48.32    2.13   0
   3  -5   1  238.10    2.89   0
   3  -5   3  504.17    3.66   0
   3  -5   4   23.88    1.92   0
   4 -20  -6   10.89    2.85   0
   4 -15  -5    8.70    2.50   0
   4 -15   9   11.59    1.93   0
   4 -12   8   79.13    2.32   0
   4 -11   7    7.00    1.40   0
   4  -8   0  117.05    2.58   0
   4  -8   4    5.89    1.81   0
   5 -19  -4   10.95    2.20   0
   5 -17   7    0.25    1.70   0
   5 -16  -3   41.79    1.79   0
   5 -16   7    4.63    2.14   0
   5 -15   6   21.12    1.74   0
   5 -14  -2   69.88    2.39   0
   5 -14   6  308.38    3.09   0
   5 -13   5   -1.34    1.90   0
   5 -12   0   58.00    1.70   0
   5 -12   4  209.02    2.88   0
   6 -22  -1    8.17    2.22   0
   6 -21  -1   25.78    2.35   0
   6 -21   0   43.00    2.14   0
   6 -21   3    1.62    1.80   0
   6 -20   0    3.49    1.76   0
   6 -20   3    4.19    1.70   0
   6 -20   4   77.70    2.62   0
   6 -19   0   16.96    2.34   0
   6 -19   1   45.91    1.90   0
   6 -19   2   18.69    1.74   0
   6 -19   3    2.96    2.45   0
   6 -18   1    5.37    2.25   0
   6 -18   2    3.08    2.36   0
 -12   2   2   -0.42    1.79   0
 -11  -3  -4   59.12    2.07   0
 -11   3   3   19.32    2.31   0
 -11   3   8   11.68    2.64   0
 -10  -2  -4    2.71    1.65   0
 -10   3   1   69.81    2.06   0
 -10   4   4  200.24    3.06   0
 -10   4   5   99.98    2.74   0
 -10   4   6   78.31    2.77   0
  -9  -7  -7   10.48    2.19   0
  -9  -1  -4   68.01    1.86   0
  -9   0  -3    1.37    2.23   0
  -9   2  -1   43.98    2.10   0
  -9   2  11    2.26    4.01   0
  -9   3   0  292.96    2.76   0
  -9   4   2   75.82    1.86   0
  -8  -6  -7   37.75    1.90   0
  -8  -4  -6    4.19    2.26   0
  -8  -2  -5    3.95    1.57   0
  -8   4   8   11.21    2.83   0
  -7  -8  -8   39.68    2.22   0
  -7   0  13   -0.75    3.00   0
  -7   1  -3   26.64    1.61   0
  -7   2  -2   45.38    1.58   0
  -7   4   1   21.07    1.91   0
  -7   4   8  117.57    4.33   0
  -6 -11  -9   32.38    2.59   0
  -6  -5  -7   48.06    1.77   0
  -6  -3  -6   -3.94    1.44   0
  -6   0  -4 1186.42    4.69   0
  -6   1  -3   -0.08    1.78   0
  -6   2  -2   44.35    2.01   0
  -6   3  -1   18.98    1.41   0
  -6   4   1    5.95    1.81   0
  -5  -5  -7    9.08    2.08   0
  -5  -3  -6    4.01    1.73   0
  -5  -1  13   -0.12    2.52   0
  -5   0  -4    1.54    1.31   0
  -5   1  -3  128.50    2.31   0
  -5   2  -2   38.26    1.94   0
  -4  -5  -7   29.70    1.56   0
  -4  -3  -6   54.53    1.58   0
  -4   4   3  637.70    6.42   0
  -3 -11  -9    2.58    1.87   0
  -3  -8  -8  334.92    3.35   0
  -3  -2  -5  128.94    2.48   0
  -3   2  -1  127.78    2.58   0
  -2 -12  -9  233.57    3.35   0
  -2   2   0  613.92    5.96   0
  -2   2   7  499.61    5.23   0
  -1  -6  13    2.83    2.48   0
  -1  -4  12    9.61    2.00   0
   0 -16  -9    2.09    2.48   0
   0  -8  13   10.76    2.28   0
   0  -6  12   19.87    2.38   0
   0  -3  10   44.44    2.10   0
   0  -2   9   99.53    2.43   0
   0   0   6  451.72    3.98   0
   1 -14  -8   -1.63    2.29   0
   1  -5  10  185.11    2.76   0
   1  -4   9    7.29    1.44   0
   1  -3   8   92.21    1.87   0
   1  -2   7   62.29    2.00   0
   1  -1   1    0.88    1.94   0
   1  -1   5  479.12    4.06   0
   2  -6   9   12.72    1.99   0
   2  -5   8  118.41    2.49   0
   2  -4   7 1048.62    4.82   0
   2  -3   0    1.46    2.11   0
   2  -3   5   31.55    1.55   0
   3 -11  10    6.23    2.29   0
   3  -9   9   48.50    2.26   0
   3  -8   8  339.90    2.88   0
   3  -6   6   30.69    1.51   0
   4 -19  -6   24.21    3.21   0
   4 -14   9   84.22    2.36   0
   4 -10   7  361.61    3.10   0
   4  -9   6   62.51    1.70   0
   4  -8   5    4.27    1.87   0
   5 -18  -4   14.48    2.09   0
   5 -15  -3   37.69    2.34   0
   5 -15   7   -1.09    2.34   0
   5 -13   6   54.74    2.32   0
   5 -12  -1    1.73    1.83   0
   5 -12   5    3.87    1.98   0
   5 -11   1    3.90    1.67   0
   5 -11   2   31.19    1.55   0
   5 -11   3    2.52    1.55   0
   6 -20  -1   29.51    2.58   0
   6 -19  -1   72.14    2.49   0
   6 -19   4    3.04    1.84   0
   6 -18   0   91.01    2.18   0
   6 -18   3    3.83    1.76   0
   6 -18   4   11.23    2.45   0
   6 -17   1  101.40    2.77   0
   6 -17   2   31.01    1.84   0
   6 -17   3   30.75    2.36   0
 -12  -1  -1   37.64    2.55   0
 -12   0   0   49.26    2.61   0
 -12   1   1   12.71    1.81   0
 -12   2   3    3.74    2.13   0
 -11  -2  -3    1.56    1.80   0
 -11  -1  -2  123.22    2.77   0
 -11   1   0  106.54    2.62   0
 -11   2   1   50.47    1.93   0
 -11   3   4   17.71    2.35   0
 -10  -4  -5    9.50    1.78   0
 -10  -1  -3   38.46    1.70   0
 -10   0  -2  156.92    2.64   0
 -10   1  -1  454.88    3.61   0
 -10   2   0    2.38    1.66   0
 -10   3   2   45.76    2.44   0
 -10   3   9   11.48    2.63   0
  -9  -5  -6    1.02    1.86   0
  -9  -3  -5  110.00    2.10   0
  -9   1  -2   12.81    1.43   0
  -9   4   3   30.42    2.13   0
  -9   4   7   66.20    2.98   0
  -8  -1  -4   79.35    2.08   0
  -8   3   0  754.36    4.24   0
  -8   4   2  259.76    3.20   0
  -7  -6  -7    0.57    2.01   0
  -7  -4  -6    5.54    2.02   0
  -7  -2  -5  137.12    2.08   0
  -6  -8  -8   18.79    1.73   0
  -6   1  12    3.20    3.16   0
  -5 -11  -9   74.93    2.18   0
  -5  -8  -8  190.87    2.93   0
  -4 -11  -9   12.98    1.75   0
  -4  -8  -8   18.18    2.07   0
  -4  -3  14   11.53    2.30   0
  -4  -2  -5   10.98    1.70   0
  -4   3   0    0.49    1.41   0
  -4   4   4 1302.54   10.56   0
  -3  -6  -7  257.44    3.09   0
  -3  -4  -6    6.29    1.88   0
  -3   0  11    1.06    1.93   0
  -3   1  10    5.16    2.34   0
  -3   3   1   92.25    2.46   0
  -2  -9  -8    2.08    1.86   0
  -2  -4  13   22.17    1.88   0
  -2  -1  11  226.52    3.32   0
  -2   0  10   24.69    2.38   0
  -1 -14  -9   16.44    2.08   0
  -1 -10  -8   21.15    1.82   0
  -1   1   7  241.40    3.53   0
   0  -4  11  135.76    2.87   0
   0  -1   8  308.51    3.01   0
   1  -8  12    0.92    2.37   0
   1  -6  11   14.99    1.99   0
   2 -11  12   10.25    2.47   0
   2  -9  11   -3.66    1.61   0
   2  -7  10  150.61    2.76   0
   2  -3   6  400.29    3.29   0
   3 -13  11    0.39    1.92   0
   3 -10  10   26.93    2.10   0
   3  -7   8   31.83    2.15   0
   3  -6   7  241.11    2.77   0
   3  -5   0  407.22    3.96   0
   3  -5   5   55.57    1.59   0
   4 -13   9   22.01    1.89   0
   4 -12  -4  190.95    3.89   0
   4 -11   8   64.81    1.98   0
   4  -9  -2  127.39    2.87   0
   4  -7   1  223.21    2.93   0
   4  -7   2   58.73    1.68   0
   4  -7   3    1.10    1.12   0
   4  -7   4   26.91    1.89   0
   5 -17   8   56.41    2.14   0
   5 -16   8   19.97    2.53   0
   5 -14   7   33.93    2.28   0
   5 -13  -2  601.55    4.78   0
   5 -11   0    7.13    1.26   0
   5 -11   4   34.14    1.56   0
   6 -22  -2    7.70    2.57   0
   6 -21  -2  101.44    2.89   0
   6 -19   5    4.30    1.76   0
   6 -18  -1   34.01    2.36   0
   6 -18   5    9.70    2.49   0
   6 -17   0    9.56    1.76   0
   6 -17   4   27.61    1.64   0
   6 -16   1   -0.75    1.46   0
   6 -16   2   30.46    1.77   0
   6 -16   3  100.75    2.06   0
   6 -16   4  207.49    2.88   0
 -12   1   2    6.53    2.45   0
 -12   2   4    3.88    2.17   0
 -11  -4  -4    9.40    1.77   0
 -11   0  -1    1.66    1.56   0
 -11   2   2    6.64    2.23   0
 -11   3   5   60.61    2.72   0
 -11   3   6   26.69    2.57   0
 -11   3   7   -0.14    2.08   0
 -10  -5  -5   66.03    2.77   0
 -10  -3  -4    9.36    1.66   0
  -9  -4  -5    2.00    2.18   0
  -9  -2  -4   19.03    1.69   0
  -9   3   1   12.24    1.55   0
  -9   4   4  254.41    3.22   0
  -9   4   6  246.95    3.88   0
  -8  -7  -7   34.64    1.89   0
  -8  -5  -6   85.20    2.49   0
  -8  -3  -5   27.74    1.97   0
  -8   0  -3   -3.03    1.47   0
  -8   1  -2   74.27    2.32   0
  -8   2  -1   63.55    1.74   0
  -7  -9  -8   83.50    2.20   0
  -7  -1  -4   30.42    2.08   0
  -7   3   0   33.92    1.90   0
  -7   4   2 1596.94    6.48   0
  -6 -12  -9    2.40    1.86   0
  -6  -9  -8   31.66    2.41   0
  -6  -6  -7  221.80    2.81   0
  -6  -4  -6  270.99    2.90   0
  -6  -2  -5   46.23    1.65   0
  -6   2  11   66.75    4.13   0
  -6   4   2    0.82    1.78   0
  -5 -12  -9   36.90    2.62   0
  -5  -6  -7   13.99    2.09   0
  -5  -2  -5  938.82    4.25   0
  -5   3   0   87.96    2.44   0
  -5   4   2    0.91    1.46   0
  -4 -12  -9   30.79    2.46   0
  -4  -6  -7  159.60    2.58   0
  -4  -4  -6  160.77    2.52   0
  -4   0  12   12.82    2.12   0
  -4   1  11   41.17    2.58   0
  -3 -12  -9    8.58    1.68   0
  -3  -9  -8    3.43    1.94   0
  -3  -4  14   15.98    2.70   0
  -3  -1  -4    6.08    1.40   0
  -3  -1  12   65.49    2.58   0
  -3   0  -3   -1.33    1.93   0
  -3   1  -2  293.71    3.33   0
  -3   3   7  197.11    4.74   0
  -2 -13  -9    5.25    1.89   0
  -2  -3  -5   37.09    1.69   0
  -2  -2  12   20.06    2.23   0
  -2   1   9   75.66    2.52   0
  -1  -5  13   31.37    2.77   0
  -1  -2  11    8.65    1.82   0
  -1  -1  10   64.56    2.59   0
  -1   1   0 1588.39   13.11   0
   0 -17  -9    1.22    2.39   0
   0 -12  -8    7.71    2.12   0
   0  -9  -7  181.11    3.20   0
   0  -7  13   10.50    2.59   0
   0  -5  -5  320.88    4.24   0
   0  -5  12   33.70    2.20   0
   0   0   7   -1.06    1.62   0
   1  -1   6   53.33    2.21   0
   2  -8  11   13.61    2.01   0
   3 -12  11   17.06    1.87   0
   3  -8   9   -3.63    1.60   0
   3  -5   6    0.30    1.84   0
   3  -4   3   33.36    2.11   0
   4 -14  10    3.84    1.86   0
   4 -12   9   25.35    1.76   0
   4 -10   8   39.90    1.79   0
   4  -9   7   25.45    1.58   0
   4  -8  -1  113.10    2.31   0
   4  -8   6    9.05    1.46   0
   4  -7   5    6.64    1.64   0
   5 -17  -4  134.16    3.16   0
   5 -15   8   26.91    1.95   0
   5 -14  -3  191.57    3.15   0
   5 -13   7   15.66    1.76   0
   5 -12   6   49.38    1.76   0
   5 -11   5   27.21    1.63   0
   5 -10   1  166.05    2.65   0
   5 -10   2   26.07    1.41   0
   5 -10   3  111.85    1.96   0
   5 -10   4    0.84    2.05   0
   6 -20  -2   19.70    1.91   0
   6 -19  -2    0.62    2.24   0
   6 -18   6   10.17    2.43   0
   6 -17  -1   47.79    2.56   0
   6 -17   5   -0.44    1.75   0
   6 -16   0   22.33    1.70   0
   6 -16   5  171.29    2.68   0
   6 -15   1   71.76    1.92   0
   6 -15   2   73.60    2.04   0
   6 -15   3   41.79    1.96   0
   6 -15   4    0.37    2.19   0
 -12  -2  -1   55.29    2.64   0
 -12   2   5   14.43    1.98   0
 -12   2   6   -1.16    2.26   0
 -11  -3  -3   65.74    2.14   0
 -11   1   1    5.46    2.24   0
 -10  -2  -3   36.42    2.09   0
 -10   2   1    2.38    1.97   0
 -10   3   3   88.14    2.45   0
  -9  -1  -3  135.33    2.22   0
  -9   0  -2    0.06    1.86   0
  -9   1  -1   70.96    2.16   0
  -9   2   0   88.73    1.96   0
  -9   4   5  115.65    2.43   0
  -8  -8  -7   -0.64    2.18   0
  -8  -2  -4   72.09    2.13   0
  -8   3   1  250.01    3.00   0
  -8   4   3   35.88    1.75   0
  -8   4   7  125.96    3.54   0
  -7 -10  -8    0.60    1.82   0
  -7  -7  -7   86.41    2.06   0
  -7  -3  -5  117.96    2.41   0
  -7   0  -3    2.23    1.70   0
  -7   1  -2   27.14    1.92   0
  -7   2  -1  355.64    3.08   0
  -6  -1  -4   45.72    1.92   0
  -6   0  13   -3.91    3.03   0
  -6   3   0   18.22    1.40   0
  -5 -13  -9   38.54    2.62   0
  -5  -9  -8   43.46    2.12   0
  -5  -4  -6   62.43    1.76   0
  -5  -1  -4    9.07    1.89   0
  -4  -9  -8    2.49    2.08   0
  -4  -1  -4 2196.72    6.98   0
  -4   2  -1  588.07    4.35   0
  -4   2  10    0.27    2.32   0
  -3 -13  -9   -0.24    2.15   0
  -3  -2  13    7.44    2.41   0
  -3   2   9    3.59    1.98   0
  -2 -10  -8  110.38    2.58   0
  -2  -7  -7  176.81    2.44   0
  -2  -5  -6  777.11    4.73   0
  -2  -5  14   17.26    1.98   0
  -1 -15  -9    2.06    1.90   0
  -1 -11  -8  158.36    2.97   0
  -1  -8  -7  128.66    2.65   0
  -1  -4  -5  224.61    3.10   0
  -1  -3  12    8.01    1.97   0
  -1   0   9    0.51    1.49   0
  -1   2   4  332.80    5.36   0
   0  -7  -6  439.36    4.54   0
   1 -11  -7    4.71    1.97   0
   1  -7  12   21.51    1.84   0
   1  -4  10   40.91    1.67   0
   1  -3   9  162.87    2.34   0
   1  -2   8   15.66    1.80   0
   2 -19  -8   15.16    3.63   0
   2 -10  12   -0.74    1.89   0
   2  -6  10   92.03    2.53   0
   2  -5   9    2.65    1.48   0
   2  -4   8    8.76    1.56   0
   2  -3   7   84.46    2.15   0
   2  -2   2   17.36    1.92   0
   2  -2   3 1136.93    5.85   0
   2  -2   4  433.44    3.65   0
   3 -11  11   16.72    1.92   0
   3  -9  10   27.80    1.89   0
   3  -4   2  881.46    5.04   0
   3  -4   4  253.57    2.72   0
   4 -18  -6    7.17    2.86   0
   4 -14  -5  128.36    3.79   0
   4 -13  10    7.11    1.91   0
   4 -11   9   22.83    1.75   0
   4 -10  -3  279.06    4.05   0
   4  -9   8   -0.33    2.08   0
   4  -8   7   81.38    2.50   0
   4  -7   0   41.74    2.33   0
   5 -22  -5    1.13    2.77   0
   5 -16  -4   41.63    2.65   0
   5 -14   8   73.69    2.11   0
   5 -12  -2  106.56    2.58   0
   5 -12   7   19.40    2.32   0
   5 -11  -1   28.20    1.53   0
   5 -11   6   31.88    1.56   0
   5 -10   0    1.55    1.78   0
   5 -10   5    1.59    2.09   0
   6 -18  -2   54.85    2.47   0
   6 -17   6    4.67    1.90   0
   6 -16  -1   12.66    2.06   0
   6 -16   6   48.11    2.52   0
   6 -15   0   74.91    1.94   0
   6 -15   5    0.56    2.30   0
   6 -14   1   44.73    2.21   0
   6 -14   2    8.32    1.54   0
   6 -14   3   87.63    1.95   0
   6 -14   4   19.81    2.40   0
 -12  -1   0    7.83    1.76   0
 -12   1   3    0.86    1.77   0
 -11  -2  -2   14.73    1.81   0
 -11  -1  -1   28.34    2.10   0
 -11   0   0   23.11    2.06   0
 -11   2   3   41.24    1.81   0
 -11   2   9    1.13    2.54   0
 -10  -6  -5    1.72    1.82   0
 -10  -4  -4    0.98    1.82   0
 -10  -1  -2   15.89    1.58   0
 -10   0  -1   -0.01    2.04   0
 -10   1   0    1.42    1.56   0
 -10   3   4    3.96    2.28   0
 -10   3   8   -3.71    2.36   0
  -9  -7  -6  237.79    2.82   0
  -9  -5  -5   -2.19    2.11   0
  -9  -3  -4  136.21    2.15   0
  -9   3   2    4.05    1.47   0
  -9   3   9    2.42    2.52   0
  -8  -6  -6  161.27    2.72   0
  -8  -4  -5    3.44    2.24   0
  -8   4   4   39.79    2.20   0
  -7 -11  -8   43.81    2.64   0
  -7  -5  -6   21.33    1.73   0
  -7   4   3  279.16    3.23   0
  -6 -10  -8    0.51    2.05   0
  -6  -7  -7    0.53    1.68   0
  -6  -3  -5   60.14    2.20   0
  -6   0  -3    0.26    1.28   0
  -6   1  -2  230.87    2.69   0
  -6   2  -1   10.07    1.35   0
  -5   0  -3   -2.86    1.64   0
  -5   2  -1   64.95    2.09   0
  -5   4   3 1166.43    7.12   0
  -4 -13  -9   21.42    1.87   0
  -4  -1  13    7.18    2.56   0
  -4   0  -3    1.36    1.34   0
  -4   1  -2 1974.93    7.12   0
  -3  -7  -7   53.24    2.16   0
  -3  -3  -5  584.28    4.04   0
  -2 -14  -9   19.78    1.82   0
  -2  -3  13   67.30    2.26   0
  -2  -2  -4  455.80    3.86   0
  -2   1  -1 1213.99    7.54   0
  -1 -16  -9   -0.09    2.26   0
  -1  -6  -6   74.40    2.25   0
  -1   1   8   79.77    2.39   0
  -1   2   3  467.73    8.51   0
  -1   2   5   73.86    2.88   0
   0 -18  -9   33.87    2.41   0
   0  -6  13    0.23    2.40   0
   0  -3  11  224.39    3.14   0
   0  -2  10   13.83    1.67   0
   0  -1   9  127.25    2.57   0
   0   1   3  227.01    4.23   0
   0   1   4   48.96    2.04   0
   1 -15  -8    2.73    2.43   0
   1  -8  13   13.45    2.25   0
   1  -5  -4  128.69    4.17   0
   1  -5  11   76.16    2.15   0
   2  -9  12    7.44    1.94   0
   2  -7  11   76.54    2.52   0
   2  -2   5  202.12    2.56   0
   3 -10  11   25.06    2.53   0
   3  -8  10   79.30    2.34   0
   3  -7   9   17.96    1.45   0
   3  -6  -2  526.05    5.82   0
   3  -6   8  128.08    2.26   0
   3  -5   7  304.66    2.71   0
   3  -4   1 1949.14    7.76   0
   3  -4   5  483.71    3.39   0
   4 -12  10   42.11    1.98   0
   4 -10   9  217.11    3.03   0
   4  -7   6   32.47    1.61   0
   4  -6   2    1.36    1.32   0
   4  -6   3  351.98    3.00   0
   4  -6   4   72.58    1.63   0
   5 -21  -5    0.75    2.35   0
   5 -15   9    1.56    1.85   0
   5 -13   8   14.61    1.76   0
   5 -11   7   94.03    2.63   0
   5 -10   6  103.26    2.40   0
   5  -9   1   18.35    1.93   0
   5  -9   2   26.44    1.55   0
   5  -9   3    2.38    1.36   0
   5  -9   4   11.98    2.08   0
   6 -22  -3   16.48    2.60   0
   6 -21  -3    0.10    2.29   0
   6 -17  -2    8.92    2.33   0
   6 -17   7   23.08    2.65   0
   6 -15  -1   64.01    2.32   0
   6 -15   6   24.07    2.30   0
   6 -14   0    2.23    1.98   0
   6 -14   5   87.58    2.57   0
   6 -13   1   80.71    2.41   0
   6 -13   2   10.28    1.48   0
   6 -13   3   16.43    1.57   0
   6 -13   4  195.60    2.70   0
 -12  -3  -1    6.42    2.53   0
 -12   0   2  162.55    2.79   0
 -12   1   4    9.38    2.12   0
 -11  -4  -3  147.76    2.49   0
 -11   1   2   52.39    2.41   0
 -11   2   4    1.63    2.02   0
 -10  -7  -5   35.07    2.76   0
 -10  -3  -3   82.39    2.30   0
 -10   2   2   -2.89    2.05   0
 -10   2  10    1.61    2.89   0
 -10   3   5  106.82    2.78   0
 -10   3   6    7.31    2.17   0
 -10   3   7    1.80    2.33   0
  -9  -8  -6    5.27    2.57   0
  -9  -2  -3   22.89    2.27   0
  -9   2   1   23.85    2.11   0
  -9   3   3   51.74    2.19   0
  -8  -9  -7   74.98    2.15   0
  -8  -1  -3    0.27    1.46   0
  -8   0  -2 2273.54    6.66   0
  -8   1  -1   10.16    2.10   0
  -8   2   0   59.37    1.84   0
  -8   4   5  130.99    2.88   0
  -8   4   6   15.03    2.20   0
  -7 -12  -8    3.60    2.57   0
  -7  -8  -7   52.70    1.85   0
  -7  -2  -4    1.64    1.46   0
  -7   3   1 1505.86    5.85   0
  -7   4   4  314.85    3.60   0
  -7   4   7   65.54    3.32   0
  -6 -11  -8   -0.99    2.36   0
  -6  -5  -6   14.30    1.44   0
  -6   4   3   19.38    1.51   0
  -6   4   7 1209.79   10.76   0
  -5 -14  -9    9.21    1.85   0
  -5 -10  -8   57.10    1.93   0
  -5  -7  -7    5.94    1.51   0
  -5  -5  -6   10.94    1.97   0
  -5  -3  -5  170.11    2.13   0
  -5   1  -2    6.24    1.26   0
  -5   1  12   -0.13    2.68   0
  -4 -14  -9   83.18    2.71   0
  -4 -10  -8   39.37    2.17   0
  -4  -7  -7  189.44    2.58   0
  -4  -5  -6  494.80    3.57   0
  -4  -3  -5  137.34    2.06   0
  -4  -2  14    4.69    2.30   0
  -4   3   1   64.67    2.14   0
  -3 -14  -9   32.07    1.93   0
  -3 -10  -8   58.25    1.86   0
  -3  -5  -6   -0.77    1.27   0
  -3  -3  14   42.21    2.96   0
  -3   3   2 1246.96    8.75   0
  -2 -15  -9   -0.65    2.35   0
  -2  -4  14    0.80    2.28   0
  -2  -1  -3  343.07    3.63   0
  -2   2   8    0.76    1.84   0
  -1  -4  13    3.87    1.83   0
   0 -19  -9    0.77    2.49   0
   0 -13  -8   30.48    2.31   0
   0  -4  12    9.56    2.23   0
   0   0   8   16.12    1.96   0
   0   1   5   38.28    1.88   0
   1  -6  12   -1.45    1.68   0
   1  -1   7  104.86    2.01   0
   2  -8  12   17.31    2.29   0
   2  -5  10   -2.25    1.94   0
   2  -4   9  679.50    4.24   0
   2  -2   6   43.72    2.03   0
   3  -9  11   58.93    2.40   0
   3  -5  -1  329.61    4.12   0
   3  -4   6    2.89    1.40   0
   4 -11  10   19.00    2.53   0
   4  -9   9   64.18    2.26   0
   4  -8   8   32.87    2.00   0
   4  -7   7  179.84    2.77   0
   4  -6   1   63.93    1.88   0
   4  -6   5  287.76    2.64   0
   5 -20  -5    0.16    2.30   0
   5 -14   9    7.88    1.81   0
   5 -13  -3   11.24    2.10   0
   5 -12   8   49.97    1.91   0
   5 -10  -1  207.14    2.90   0
   5  -9   5   18.49    1.62   0
   6 -20  -3   -4.14    2.32   0
   6 -19  -3    2.45    1.97   0
   6 -16  -2    4.41    1.82   0
   6 -16   7   78.11    2.29   0
   6 -15   7   -4.59    2.14   0
   6 -14   6    2.80    2.25   0
   6 -13   5   20.31    2.37   0
   6 -12   2   56.86    2.22   0
   6 -12   3   98.82    2.48   0
   7 -21   1   10.24    1.93   0
   7 -20   1    6.73    2.58   0
   7 -20   2    3.82    1.86   0
   7 -20   3    1.86    1.85   0
   7 -19   2    2.38    2.35   0
   7 -19   3    7.59    2.53   0
 -12  -2   0   11.08    1.91   0
 -12  -1   1   11.39    1.83   0
 -12   1   5    3.60    2.23   0
 -11  -5  -3   -5.52    2.58   0
 -11  -3  -2   70.23    2.16   0
 -11  -2  -1   12.96    2.28   0
 -11  -1   0  101.08    2.74   0
 -11   0   1   -3.15    2.22   0
 -11   2   5    7.54    2.15   0
 -11   2   6   24.94    2.70   0
 -11   2   7    3.16    2.56   0
 -11   2   8    0.60    2.16   0
 -10  -5  -4  101.83    2.23   0
 -10  -2  -2    6.22    1.88   0
 -10   1   1  140.12    2.80   0
  -9  -6  -5   16.58    1.98   0
  -9  -4  -4   14.70    1.97   0
  -9  -1  -2   12.50    1.40   0
  -9   0  -1   -2.96    2.01   0
  -9   1   0    2.05    2.03   0
  -8 -10  -7   47.75    2.13   0
  -8  -7  -6   13.36    1.73   0
  -8  -5  -5   60.31    2.36   0
  -8  -3  -4  162.09    2.15   0
  -8   2  11    8.53    4.79   0
  -8   3   2  102.70    2.11   0
  -7  -9  -7    3.33    2.24   0
  -7  -6  -6   -3.17    1.61   0
  -7  -4  -5   77.54    1.83   0
  -7  -1  -3   33.96    1.89   0
  -7   2   0   27.32    1.95   0
  -7   4   5   23.78    2.20   0
  -7   4   6   51.33    2.80   0
  -6  -8  -7    1.82    1.52   0
  -6  -2  -4    7.03    1.67   0
  -6   3   1   17.63    1.50   0
  -6   4   4    8.33    1.95   0
  -5 -11  -8   -0.84    2.28   0
  -5   0  13    0.60    2.50   0
  -5   3   1 1113.60    6.01   0
  -5   4   4   12.86    2.00   0
  -5   4   6   26.77    3.02   0
  -4 -15  -9   15.22    2.53   0
  -3 -15  -9   -1.32    2.06   0
  -3  -2  -4  347.71    3.49   0
  -3   2   0   25.39    1.59   0
  -2 -16  -9   96.42    3.07   0
  -2 -11  -8   51.27    1.87   0
  -2  -8  -7   53.91    1.79   0
  -2  -4  -5    2.93    1.92   0
  -2  -1  12   60.75    2.55   0
  -2   0  -2   55.78    1.96   0
  -2   0  11   -3.93    2.13   0
  -1 -17  -9    1.01    2.22   0
  -1 -12  -8   32.95    2.11   0
  -1  -9  -7  104.42    2.55   0
  -1  -3  -4  488.84    4.31   0
  -1  -1  11   97.59    2.57   0
  -1   0  10  265.14    3.49   0
  -1   2   6  167.43    3.37   0
   0 -20  -9    0.91    2.64   0
   0 -10  -7    0.40    1.87   0
   0  -5  13    3.84    2.53   0
   0   1   6   85.01    2.62   0
   1  -7  13   19.01    2.63   0
   1  -4  11   57.19    2.64   0
   1  -3  10   41.22    1.70   0
   1  -2   9  222.56    2.66   0
   1   0   3   -1.62    1.81   0
   1   0   4  131.03    2.50   0
   1   0   5   -0.63    2.00   0
   2 -20  -8   -1.52    3.36   0
   2 -14  -7    9.71    3.07   0
   2  -6  11   75.16    2.61   0
   2  -3   8  943.72    4.60   0
   2  -2   1  799.60    6.22   0
   3  -7  -3  510.77    6.51   0
   3  -7  10    6.73    2.16   0
   3  -6   9  323.91    2.81   0
   3  -5   8   -1.81    1.45   0
   4 -10  10   84.53    2.67   0
   4  -8  -2  308.69    3.91   0
   4  -7  -1  185.11    3.22   0
   4  -6   6  141.37    2.14   0
   5 -19  -5   14.73    2.39   0
   5 -15  -4    4.79    2.09   0
   5 -13   9   37.03    2.02   0
   5 -11  -2    8.43    1.68   0
   5 -11   8    2.07    1.67   0
   5 -10   7   17.34    1.68   0
   5  -9   0  207.11    2.85   0
   5  -9   6   17.23    1.54   0
   5  -8   2  322.35    3.13   0
   5  -8   3   59.29    1.67   0
   5  -8   4  423.61    3.35   0
   6 -18  -3  211.22    3.26   0
   6 -14  -1   15.78    1.63   0
   6 -13   0    3.78    1.64   0
   6 -13   6   63.07    2.55   0
   6 -12   1  111.20    2.51   0
   6 -12   4   58.88    1.73   0
   6 -12   5  278.75    3.25   0
   7 -21   0   20.00    1.93   0
   7 -20   0   12.52    2.45   0
   7 -19   1   -1.88    1.80   0
   7 -19   4   -2.94    1.84   0
   7 -18   1    8.72    2.40   0
   7 -18   2   74.25    2.23   0
   7 -18   3   72.51    2.31   0
   7 -18   4   57.57    2.72   0
   7 -17   2    0.60    2.02   0
   7 -17   3   27.24    2.16   0
 -12   0   3   -1.14    1.74   0
 -12   1   6    1.85    1.98   0
 -11   1   3   -3.10    1.99   0
 -10  -8  -5   -0.45    1.86   0
 -10  -6  -4   20.36    2.55   0
 -10  -4  -3   -1.91    1.98   0
 -10  -1  -1  416.79    3.19   0
 -10   0   0   91.29    2.14   0
 -10   2   3    1.08    1.79   0
  -9  -9  -6   22.01    1.94   0
  -9  -3  -3   80.45    2.51   0
  -9   3   4   45.46    2.14   0
  -9   3   8   15.42    2.56   0
  -8 -11  -7   77.13    2.90   0
  -8  -8  -6    2.86    2.23   0
  -8  -2  -3   49.24    2.07   0
  -8   2   1  134.07    2.65   0
  -7  -7  -6   15.69    2.29   0
  -7  -3  -4   17.30    2.06   0
  -7   0  -2  138.08    2.07   0
  -7   1  -1   27.54    1.46   0
  -7   3   2   18.97    1.99   0
  -6 -12  -8    4.84    1.98   0
  -6  -9  -7   64.43    2.46   0
  -6  -6  -6  146.90    2.17   0
  -6  -4  -5  255.37    2.52   0
  -6  -1  -3    3.17    1.82   0
  -6   2   0    9.47    1.80   0
  -6   4   5  531.16    5.38   0
  -5  -8  -7  105.43    2.08   0
  -5  -2  -4    0.51    1.38   0
  -5   2  11   91.04    3.90   0
  -5   4   5    4.42    2.11   0
  -4 -16  -9   15.38    2.66   0
  -4 -11  -8   54.67    2.02   0
  -4  -8  -7   74.69    2.31   0
  -4  -2  -4  193.11    2.43   0
  -3 -16  -9    4.66    2.45   0
  -3 -11  -8    0.04    1.55   0
  -3  -8  -7    6.85    1.52   0
  -3  -1  13    8.89    2.22   0
  -3   0  12   32.82    2.43   0
  -3   1  11    4.41    2.04   0
  -2  -6  -6   84.55    1.92   0
  -2  -2  13    0.21    2.45   0
  -2   1  10   60.44    2.71   0
  -2   2   1  419.59    6.04   0
  -1 -18  -9   69.93    2.89   0
  -1  -2  12    2.34    1.57   0
   0 -14  -8  442.83    5.00   0
   0  -4  -4    7.90    1.77   0
   0  -2  11   -1.86    2.27   0
   0  -1  10   72.19    2.68   0
   1 -16  -8   -0.11    2.45   0
   1  -9  -6  413.35    5.37   0
   1  -5  12   57.55    2.06   0
   1  -1   8   22.85    1.37   0
   1   0   6    3.51    1.83   0
   2  -7  12   14.75    2.55   0
   2  -4  -2  283.63    5.99   0
   2  -2   7  606.04    3.75   0
   3  -8  11   31.61    2.39   0
   3  -4   0  357.09    4.03   0
   3  -4   7  137.23    2.09   0
   3  -3   2  487.60    4.01   0
   3  -3   3 2485.50    7.94   0
   3  -3   4  361.77    3.17   0
   3  -3   5  587.85    4.01   0
   4 -17  -6   39.72    3.65   0
   4 -11  -4    4.91    1.81   0
   4 -11  11    3.02    2.22   0
   4  -8   9   36.51    2.36   0
   4  -7   8   49.41    1.68   0
   4  -6   0  308.54    3.52   0
   4  -6   7  156.52    2.58   0
   4  -5   2  207.34    2.84   0
   4  -5   3  135.36    2.12   0
   4  -5   4  302.66    2.71   0
   4  -5   5  108.19    2.12   0
   5 -18  -5   56.12    2.98   0
   5 -12   9   28.45    2.03   0
   5 -10   8   68.10    2.35   0
   5  -9   7   -1.63    1.91   0
   5  -8   1   82.23    2.19   0
   5  -8   5  138.46    2.15   0
   6 -15  -2    1.00    2.03   0
   6 -15   8   -0.24    1.86   0
   6 -13  -1  441.56    3.90   0
   6 -13   7   17.60    2.23   0
   6 -12   0   -0.12    2.00   0
   6 -12   6   12.46    2.23   0
   6 -11   2   62.15    2.27   0
   6 -11   3   76.56    1.90   0
   6 -11   4   -3.36    2.00   0
   7 -21  -1    4.96    2.63   0
   7 -20  -1   31.69    2.29   0
   7 -19   0   62.25    2.27   0
   7 -18   0   57.40    2.66   0
   7 -18   5   74.24    2.30   0
   7 -17   1   52.28    2.49   0
   7 -17   4    2.86    1.80   0
   7 -17   5    0.13    2.50   0
   7 -16   2   73.54    2.65   0
   7 -16   3    6.34    2.27   0
   7 -16   4   25.71    2.15   0
 -12  -3   0   42.54    1.99   0
 -12  -2   1   24.67    1.93   0
 -12  -1   2    9.25    1.77   0
 -12   0   4   54.64    2.38   0
 -11  -6  -3   18.19    2.26   0
 -11  -4  -2   18.93    1.89   0
 -11  -3  -1    7.09    2.38   0
 -11   0   2    6.69    2.29   0
 -11   1   4  122.36    2.83   0
 -10  -3  -2   44.39    2.48   0
 -10   1   2    9.37    2.36   0
 -10   2   4    4.01    2.22   0
 -10   2   9    2.53    2.85   0
  -9 -10  -6   -3.09    2.20   0
  -9  -7  -5    8.54    1.79   0
  -9  -5  -4   48.27    1.78   0
  -9  -2  -2   11.33    1.82   0
  -9   2   2   83.39    1.98   0
  -9   3   5  186.12    3.10   0
  -9   3   7   79.41    3.09   0
  -8  -6  -5  183.96    2.72   0
  -8  -4  -4   10.73    1.75   0
  -8  -1  -2   71.74    2.27   0
  -8   0  -1    0.32    2.13   0
  -8   1   0  857.22    4.61   0
  -8   3   3   14.84    1.57   0
  -8   3   9  211.11    4.80   0
  -7 -10  -7    1.53    1.67   0
  -7  -5  -5   24.77    1.57   0
  -6 -13  -8    7.27    2.18   0
  -6   0  -2  699.83    3.98   0
  -6   1  -1   13.85    1.73   0
  -6   4   6   21.92    2.21   0
  -5 -12  -8   58.84    2.08   0
  -5  -6  -6  181.75    2.33   0
  -5  -4  -5  391.86    3.00   0
  -5  -1  -3  121.25    2.28   0
  -5   2   0  123.61    2.60   0
  -4 -12  -8   84.13    2.56   0
  -4  -6  -6  151.13    2.51   0
  -4  -4  -5   -2.53    1.87   0
  -4  -1  -3   16.99    1.98   0
  -4   2   0   22.32    1.49   0
  -4   3   9  452.85    6.86   0
  -3 -17  -9    9.20    2.66   0
  -3  -6  -6   31.99    1.82   0
  -3  -4  -5  489.63    3.56   0
  -3  -2  14   15.45    2.46   0
  -3  -1  -3   39.94    1.67   0
  -3   0  -2 2164.45    7.86   0
  -3   1  -1  150.03    2.87   0
  -2 -17  -9   23.85    2.22   0
  -2 -12  -8   -2.28    1.72   0
  -2  -3  14   -0.54    2.29   0
  -2   3   5  600.52    8.84   0
  -1 -19  -9    1.62    2.57   0
  -1 -13  -8   51.14    2.31   0
  -1  -7  -6  742.80    5.07   0
  -1  -5  -5    2.07    2.02   0
  -1  -3  13   14.63    2.00   0
  -1  -2  -3   36.70    2.17   0
  -1   1   9  217.16    3.33   0
   0  -3  12   -1.25    1.61   0
   0   0   9    0.24    1.98   0
   0   1   2 2289.18   15.08   0
   0   1   7   71.40    2.30   0
   1 -12  -7   10.60    2.15   0
   1  -7  -5  527.28    6.51   0
   1  -6  13   16.02    2.67   0
   1  -1   0 1476.71   13.05   0
   2 -21  -8  152.76    5.97   0
   2  -5  11   16.57    2.29   0
   2  -4  10   89.71    1.89   0
   2  -3  -1    1.08    2.14   0
   2  -3   9   14.07    2.31   0
   2  -1   4 1089.19    5.75   0
   2  -1   5   15.31    1.91   0
   3  -9  12   12.81    2.68   0
   3  -6  10    8.48    2.26   0
   3  -5   9   17.27    1.53   0
   3  -4   8   16.52    2.11   0
   3  -3   6  222.01    2.78   0
   4  -9  -3  160.71    3.31   0
   4  -9  10   54.82    1.90   0
   4  -5   6  477.16    3.47   0
   5 -12  -3   -1.94    1.77   0
   5 -11   9   72.96    2.16   0
   5  -8   6  171.54    2.32   0
   5  -7   3  116.58    2.37   0
   5  -7   4  698.86    3.87   0
   6 -22  -4   12.60    2.72   0
   6 -21  -4   36.91    2.93   0
   6 -17  -3   13.72    1.66   0
   6 -14   8    0.96    1.84   0
   6 -12   7   19.65    2.16   0
   6 -11   1  604.52    3.87   0
   6 -11   5    3.51    1.37   0
   6 -11   6    0.85    2.04   0
   7 -19  -1   26.05    2.58   0
   7 -17   0   29.35    2.43   0
   7 -16   1    4.52    1.62   0
   7 -16   5   25.49    1.91   0
   7 -15   2   21.14    2.20   0
   7 -15   3   -5.49    2.20   0
   7 -15   4    9.73    2.33   0
 -12  -1   3   -0.09    2.55   0
 -12   0   5   -2.07    2.50   0
 -11  -5  -2   69.55    2.66   0
 -11  -2   0   15.20    1.72   0
 -11  -1   1    1.01    1.68   0
 -10  -7  -4   -0.40    1.80   0
 -10  -5  -3   98.71    2.04   0
 -10  -2  -1   18.98    1.66   0
 -10  -1   0    0.61    2.23   0
 -10   0   1    3.17    2.01   0
 -10   2   5   99.67    2.77   0
  -9  -8  -5   30.99    2.46   0
  -9  -1  -1   73.44    2.09   0
  -9   0   0  145.93    2.63   0
  -9   1   1   -2.74    1.53   0
  -9   3   6    0.03    1.97   0
  -8  -9  -6   20.66    1.67   0
  -8   3   4   72.91    2.51   0
  -7 -11  -7    3.43    2.09   0
  -7  -8  -6  301.41    3.20   0
  -7  -2  -3  416.86    3.00   0
  -7   2   1  126.30    2.45   0
  -6 -14  -8    2.40    2.23   0
  -6 -10  -7  125.46    2.43   0
  -6  -7  -6   40.89    1.57   0
  -6  -5  -5   -0.11    1.93   0
  -6  -3  -4   65.46    1.72   0
  -6   3   2   17.68    1.47   0
  -5 -13  -8   24.82    2.37   0
  -5  -9  -7    3.33    1.39   0
  -5   0  -2    2.07    1.27   0
  -5   1  -1   16.64    1.90   0
  -4  -9  -7   17.63    2.16   0
  -4   0  -2  243.98    3.08   0
  -4   0  13    1.62    2.52   0
  -4   1  -1   95.77    2.50   0
  -4   1  12   51.79    2.74   0
  -4   3   2 1285.77    7.58   0
  -3 -12  -8   38.09    1.92   0
  -3  -9  -7    5.20    1.98   0
  -3   2  10   16.41    2.35   0
  -3   3   8   14.84    2.40   0
  -2 -18  -9    0.58    2.17   0
  -2  -9  -7   30.55    1.59   0
  -2  -3  -4   62.77    2.31   0
  -2   2   9  183.44    3.36   0
  -1  -4  14   -1.22    2.58   0
  -1   0  -1    0.70    2.01   0
  -1   2   7   21.14    2.15   0
   0  -8  -6   15.87    1.95   0
   0  -6  -5 1203.45    7.56   0
   0  -4  13   16.72    1.99   0
   1  -4  12    5.51    2.41   0
   1  -3  11   -1.57    1.82   0
   1  -2  10   44.59    1.88   0
   1  -1   9   -1.58    1.87   0
   1   0   2 1031.92    7.65   0
   1   0   7    4.34    1.83   0
   2 -11  -6  194.36    5.33   0
   2  -6  12   65.53    2.69   0
   2  -2   8    0.93    1.49   0
   2  -1   3  324.86    3.39   0
   2  -1   6  688.32    4.35   0
   3  -7  11    4.04    1.65   0
   3  -3   7   -0.35    1.82   0
   4 -13  -5   34.59    3.14   0
   4 -10  11   93.02    2.33   0
   4  -8  10    7.97    2.28   0
   4  -7   9  138.29    2.31   0
   4  -6   8  409.13    3.07   0
   4  -5   1  159.28    2.44   0
   5 -14  -4  144.99    3.35   0
   5 -12  10   69.45    2.26   0
   5 -10  -2   14.86    1.96   0
   5 -10   9   13.20    1.76   0
   5  -9  -1   23.88    1.49   0
   5  -9   8   40.66    1.86   0
   5  -8   0   12.16    1.87   0
   5  -8   7  101.95    1.92   0
   5  -7   2  889.28    4.46   0
   5  -7   5  217.64    2.49   0
   6 -20  -4   55.67    2.62   0
   6 -16  -3   15.18    2.18   0
   6 -14  -2    1.73    1.42   0
   6 -13   8   12.14    1.92   0
   6 -12  -1   18.63    2.06   0
   6 -11   0    1.54    2.01   0
   6 -10   2   29.90    1.66   0
   6 -10   3  157.74    2.18   0
   6 -10   4   98.69    1.94   0
   6 -10   5  104.94    2.34   0
   7 -21  -2    7.54    2.22   0
   7 -18  -1   31.56    2.47   0
   7 -16   0   44.62    2.41   0
   7 -16   6    1.49    1.79   0
   7 -15   1   47.58    1.89   0
   7 -15   5    5.83    1.93   0
   7 -14   2  369.08    3.39   0
   7 -14   3    8.38    2.14   0
   7 -14   4  232.47    3.16   0
 -12  -4   0   -2.91    1.93   0
 -12  -3   1    3.53    2.25   0
 -12  -2   2   -1.19    2.14   0
 -12   0   6    8.21    2.43   0
 -11  -7  -3    6.09    1.95   0
 -11  -4  -1   96.41    2.82   0
 -11   0   3    0.35    2.00   0
 -11   1   5    2.17    1.85   0
 -11   1   6   83.98    2.96   0
 -11   1   9   18.20    2.50   0
 -10  -4  -2   19.99    2.30   0
 -10   1   3    1.24    2.35   0
 -10   2   6    4.97    2.24   0
 -10   2   7  227.38    3.70   0
 -10   2   8    2.58    2.33   0
  -9  -6  -4   36.07    1.82   0
  -9  -4  -3  411.29    3.14   0
  -9   2   3   22.47    1.64   0
  -9   2  10   -1.75    3.13   0
  -8 -10  -6    3.61    2.44   0
  -8  -7  -5   10.07    1.68   0
  -8  -5  -4    3.65    1.92   0
  -8  -3  -3   65.95    1.83   0
  -8   2   2    4.97    2.05   0
  -7 -12  -7   21.82    2.44   0
  -7  -6  -5    2.08    1.38   0
  -7  -4  -4   -0.01    1.63   0
  -7  -1  -2   23.73    1.52   0
  -7   0  -1    0.52    1.74   0
  -7   1   0   66.59    2.15   0
  -7   3   3  180.53    2.79   0
  -6 -15  -8    3.26    2.56   0
  -6  -2  -3   17.01    1.90   0
  -5 -14  -8   66.31    2.72   0
  -5 -10  -7   22.51    2.43   0
  -5  -7  -6   27.13    1.99   0
  -5  -3  -4  120.24    2.08   0
  -5   3   2   59.28    2.09   0
  -4 -13  -8    9.32    2.01   0
  -4  -1  14    2.70    2.69   0
  -4   2  11  254.87    4.61   0
  -3 -13  -8   -3.86    2.31   0
  -2 -13  -8   17.62    2.22   0
  -2  -7  -6  166.22    2.77   0
  -2   0  12    2.80    1.92   0
  -2   3   6    0.28    1.92   0
  -1 -10  -7  970.26    5.74   0
  -1  -1  -2  966.71    7.30   0
  -1  -1  12   42.74    2.35   0
  -1   0  11    2.30    1.99   0
   0 -15  -8   66.06    2.74   0
   0 -11  -7  892.54    6.26   0
   1 -17  -8   83.71    3.26   0
   1  -5  13   61.65    2.76   0
   2  -4  11    8.25    1.96   0
   2  -3  10  180.03    2.65   0
   3 -18  -7   37.72    5.25   0
   3  -8  12   -2.06    1.89   0
   3  -5  10    0.44    2.24   0
   3  -4   9   63.56    2.31   0
   3  -3   1  842.93    5.34   0
   4  -9  11   -0.63    1.95   0
   4  -5   7   31.33    1.53   0
   4  -4   3   10.55    1.83   0
   4  -4   4  309.86    2.78   0
   4  -4   5    2.17    1.91   0
   5 -17  -5   27.79    2.88   0
   5 -11  10   62.37    2.17   0
   5  -9   9   20.14    2.11   0
   5  -8   8  185.76    3.02   0
   5  -7   1   25.09    1.93   0
   5  -7   6   26.50    1.55   0
   6 -19  -4   11.97    2.13   0
   6 -12   8    6.19    1.98   0
   6 -11   7   28.73    1.84   0
   6 -10   1  675.13    4.10   0
   6 -10   6   25.37    1.77   0
   6  -9   3   30.99    1.93   0
   6  -9   4   35.76    2.36   0
   7 -20  -2   13.69    2.47   0
   7 -17  -1   79.25    2.19   0
   7 -15   0  323.05    3.67   0
   7 -15   6    5.23    1.82   0
   7 -14   1    1.28    2.08   0
   7 -14   5    1.52    1.58   0
   7 -14   6   64.63    2.64   0
   7 -13   3   42.42    2.32   0
   7 -13   4   -1.11    1.98   0
 -12  -1   4   -0.05    1.88   0
 -11  -6  -2   53.49    2.31   0
 -11  -3   0   24.52    2.11   0
 -11  -2   1   61.26    2.47   0
 -11  -1   2   33.21    2.21   0
 -11   1   7    2.43    2.24   0
 -11   1   8    0.52    2.24   0
 -10  -8  -4   34.99    1.99   0
 -10  -6  -3   33.53    1.80   0
 -10  -3  -1  111.86    2.52   0
 -10   0   2   34.55    2.37   0
  -9  -9  -5   -0.66    1.80   0
  -9  -3  -2   18.00    1.59   0
  -9   1   2   35.80    2.29   0
  -9   2   4   19.29    2.07   0
  -8  -2  -2   12.27    1.44   0
  -8   1   1    8.03    2.14   0
  -8   3   5    1.91    1.99   0
  -8   3   8   56.80    3.05   0
  -7 -13  -7    2.27    2.52   0
  -7  -9  -6   92.42    2.15   0
  -6 -11  -7   39.31    1.90   0
  -6  -8  -6   22.85    1.55   0
  -6   2   1  911.81    5.06   0
  -5  -5  -5   13.84    1.48   0
  -4 -14  -8   84.04    2.81   0
  -4 -10  -7  352.86    3.31   0
  -4  -7  -6   29.64    1.65   0
  -4  -5  -5  113.75    2.33   0
  -4  -3  -4 2136.92    6.96   0
  -3  -7  -6   99.72    2.15   0
  -3  -5  -5   75.73    2.17   0
  -3  -3  -4  371.88    3.25   0
  -2 -10  -7   59.88    2.30   0
  -2  -5  -5  655.92    4.47   0
  -2  -1  13    7.26    2.53   0
  -2   1  11  237.48    3.50   0
  -1  -2  13   68.15    2.23   0
  -1   1  10   59.48    2.38   0
  -1   2   8    6.59    1.92   0
   0  -3  -3   -0.27    1.79   0
   0  -3  13   81.37    2.59   0
   0  -2  12    0.06    1.67   0
   0  -1  11   80.61    2.16   0
   0   0  10  125.79    2.84   0
   0   1   8  306.39    3.18   0
   1   0   8    6.94    1.78   0
   2  -5  12    2.67    2.50   0
   2  -2   0  618.33    6.27   0
   2  -2   9  321.89    3.32   0
   2  -1   2 1721.28    8.00   0
   2  -1   7  164.88    2.30   0
   3  -7  12   22.84    2.29   0
   3  -6  11   91.52    2.14   0
   3  -3   8  221.33    2.93   0
   3  -2   3  311.82    3.40   0
   3  -2   4  333.79    3.16   0
   3  -2   5  129.57    2.13   0
   4  -8  11    4.55    2.13   0
   4  -7  10    1.37    1.64   0
   4  -6  -1   39.51    2.21   0
   4  -6   9   98.61    2.14   0
   4  -5   8   77.67    2.40   0
   4  -4   2   97.77    2.50   0
   4  -4   6  145.54    2.50   0
   5 -10  10   -1.98    1.94   0
   5  -7   7    8.05    1.43   0
   5  -6   3  333.13    2.89   0
   5  -6   4   15.44    1.40   0
   5  -6   5  141.53    2.10   0
   6 -15  -3  145.71    3.01   0
   6 -13  -2    1.45    1.45   0
   6 -12   9   -1.53    2.26   0
   6 -11   8   -4.15    1.72   0
   6 -10   7  129.16    2.16   0
   6  -9   2   -0.48    1.48   0
   6  -9   5    8.28    1.50   0
   6  -9   6   79.73    2.23   0
   7 -19  -2   70.92    2.44   0
   7 -18  -2   -0.83    2.06   0
   7 -16  -1  159.07    2.99   0
   7 -15   7    0.03    1.83   0
   7 -14   0   81.69    2.34   0
   7 -14   7    7.39    2.25   0
   7 -13   1    6.25    1.83   0
   7 -13   2   39.45    1.76   0
   7 -13   5    8.22    1.69   0
   7 -13   6   74.49    2.42   0
 -12  -5   0   11.29    1.89   0
 -12  -4   1   28.79    2.24   0
 -12  -3   2   46.57    2.64   0
 -12  -2   3    3.32    1.79   0
 -12  -1   5    5.98    2.54   0
 -11  -5  -1   68.23    2.68   0
 -11   0   4   26.49    1.88   0
 -10  -9  -4    0.73    1.95   0
 -10  -7  -3   97.38    2.86   0
 -10  -5  -2   20.60    2.34   0
 -10  -2   0    3.22    1.69   0
 -10  -1   1  135.02    2.38   0
 -10   1   4   65.18    2.45   0
  -9 -10  -5   11.02    2.27   0
  -9  -7  -4   43.07    1.91   0
  -9  -5  -3   28.69    1.81   0
  -9  -2  -1   40.75    1.67   0
  -9  -1   0   -3.09    2.07   0
  -9   0   1   -2.35    1.80   0
  -8 -11  -6   -0.24    1.91   0
  -8  -8  -5   -1.43    1.71   0
  -8  -6  -4  198.04    2.79   0
  -8  -4  -3    9.63    1.54   0
  -8  -1  -1    3.31    1.58   0
  -8   0   0 2526.63    7.23   0
  -8   2   3  433.03    3.84   0
  -8   3   6    2.45    2.11   0
  -8   3   7   59.10    2.51   0
  -7 -10  -6   55.43    2.42   0
  -7  -7  -5   41.06    1.57   0
  -7  -5  -4   44.07    2.24   0
  -7  -3  -3   10.48    1.43   0
  -7   2   2   53.29    2.09   0
  -7   3   4   79.85    2.33   0
  -6 -12  -7   29.77    2.26   0
  -6  -6  -5   72.73    1.81   0
  -6  -4  -4  248.68    2.50   0
  -6  -1  -2  230.36    2.44   0
  -6   0  -1   -2.67    1.65   0
  -6   1   0  338.76    3.29   0
  -6   3   3   52.76    2.20   0
  -5 -15  -8   28.96    2.01   0
  -5 -11  -7   92.24    2.48   0
  -5  -8  -6  179.52    2.87   0
  -5  -2  -3  516.21    3.32   0
  -5   2   1   24.98    2.22   0
  -3 -14  -8   97.36    2.55   0
  -3 -10  -7   -2.55    1.62   0
  -3   0  13   -2.36    2.45   0
  -3   1  12   65.77    2.57   0
  -3   2   1  442.66    4.91   0
  -3   3   3   72.92    3.34   0
  -2 -14  -8   53.96    2.12   0
  -2  -2  -3 1189.44    6.19   0
  -2  -2  14    5.03    1.91   0
  -2   3   7  479.24    5.56   0
  -1 -15  -8    0.79    2.20   0
  -1  -8  -6  343.01    3.73   0
  -1  -3  14    2.06    1.86   0
   0 -16  -8   29.98    2.36   0
   1 -18  -8   32.03    2.76   0
   1  -4  13    6.26    2.20   0
   1  -3  12    9.02    1.68   0
   1  -2  11  146.46    2.56   0
   1  -1  10  241.71    3.10   0
   2  -6  13   53.87    2.85   0
   2  -1   8  544.21    3.82   0
   3  -4  10   14.98    2.20   0
   3  -2   6   35.25    1.45   0
   4  -7  -2    4.56    1.91   0
   4  -5   0   44.57    1.80   0
   4  -4   7   79.82    2.39   0
   5 -13  -4   47.23    2.62   0
   5 -11  -3   69.67    2.37   0
   5  -9  10   16.39    2.58   0
   5  -8  -1    3.19    1.79   0
   5  -8   9   18.26    1.71   0
   5  -7   0  774.74    4.78   0
   5  -7   8  191.76    2.93   0
   5  -6   2   42.56    1.57   0
   5  -6   6  187.97    2.37   0
   6 -18  -4    2.18    2.22   0
   6 -11  -1 1271.38    5.85   0
   6 -11   9   48.37    2.48   0
   6 -10   0    6.42    1.40   0
   6 -10   8    1.77    2.16   0
   6  -9   1  128.40    2.51   0
   6  -9   7   69.03    2.34   0
   6  -8   3   12.50    1.89   0
   6  -8   4   39.82    2.09   0
   7 -15  -1   70.41    2.72   0
   7 -13   7   -5.16    2.27   0
   7 -12   2  104.91    2.49   0
   7 -12   3    1.29    1.52   0
   7 -12   4  174.21    2.47   0
   7 -12   5    2.98    1.60   0
   8 -19   1   25.19    2.74   0
   8 -18   2    0.94    2.61   0
   8 -18   3   13.80    1.97   0
   8 -17   3    3.43    2.28   0
   8 -17   4    4.85    2.31   0
 -12  -1   6   -5.31    2.64   0
 -11  -7  -2   82.07    2.15   0
 -11  -4   0    0.82    2.01   0
 -11  -1   3   -0.01    2.00   0
 -11   0   5   -3.52    2.35   0
 -10 -10  -4    0.53    2.49   0
 -10  -4  -1   29.47    2.27   0
 -10   1   5   -0.49    2.30   0
 -10   1  10   -2.45    2.81   0
  -9  -8  -4   46.73    2.34   0
  -9  -4  -2   13.67    1.96   0
  -9   2   5   11.55    2.18   0
  -9   2   9   -0.36    2.53   0
  -8 -12  -6    7.72    1.84   0
  -8  -9  -5   12.37    2.32   0
  -8  -3  -2   28.18    2.26   0
  -7 -14  -7   -1.60    1.82   0
  -7  -2  -2   44.90    1.58   0
  -7   3   9    1.15    2.88   0
  -6 -13  -7   12.00    2.31   0
  -6  -9  -6   68.46    1.91   0
  -6   1  13   75.99    4.62   0
  -5 -16  -8   19.14    1.90   0
  -5  -6  -5  148.03    2.61   0
  -5  -4  -4   38.94    1.93   0
  -5  -1  -2    1.83    1.77   0
  -5   3   3  595.32    5.17   0
  -4 -15  -8   15.78    1.80   0
  -4 -11  -7    7.19    1.98   0
  -4  -8  -6   18.58    2.02   0
  -4  -2  -3  311.67    2.96   0
  -4   2   1    7.87    1.69   0
  -3 -15  -8    1.90    2.31   0
  -3  -2  -3  299.01    3.08   0
  -3  -1  14   53.45    2.92   0
  -2 -15  -8   23.51    2.28   0
  -2   1   0  863.14    7.33   0
  -2   2  10    4.12    2.24   0
  -2   3   4    8.59    3.94   0
  -1 -11  -7    2.88    1.81   0
  -1  -4  -4  346.36    3.80   0
   0 -12  -7    0.94    2.27   0
   0   1   9  126.73    2.73   0
   1 -13  -7    3.23    2.23   0
   1  -4  -3  434.69    8.38   0
   1   0   9    2.20    2.14   0
   1   1   4  234.66    3.35   0
   1   1   5  484.63    4.14   0
   1   1   6   52.54    2.34   0
   2 -15  -7    0.63    2.54   0
   2  -4  12   27.73    2.44   0
   2  -3  11  178.76    2.93   0
   2  -2  10   13.25    2.09   0
   2   0   5   -2.66    1.94   0
   3  -6  12    0.05    2.60   0
   3  -5  11    1.89    1.76   0
   3  -4  -1  810.51    6.36   0
   3  -3   9   11.02    1.65   0
   3  -2   2  182.92    2.60   0
   3  -2   7  336.47    2.81   0
   4 -16  -6   34.62    5.35   0
   4  -7  11   -2.22    2.62   0
   4  -6  10  298.79    3.02   0
   4  -5   9   -1.32    1.65   0
   4  -4   1   15.51    2.03   0
   4  -4   8    3.01    1.88   0
   4  -3   4 2242.93    7.13   0
   4  -3   5  141.67    2.38   0
   5 -16  -5   57.02    3.22   0
   5  -9  -2  403.06    4.02   0
   5  -6   1  224.41    2.90   0
   5  -6   7   10.03    1.58   0
   5  -5   4  192.27    2.59   0
   5  -5   5   18.53    1.82   0
   6 -17  -4   63.81    2.53   0
   6 -14  -3    1.08    2.08   0
   6 -12  -2   25.03    2.26   0
   6  -8   2   28.27    1.99   0
   6  -8   5   -1.64    1.53   0
   6  -8   6   26.92    2.06   0
   7 -21  -3   -0.24    2.57   0
   7 -20  -3   10.48    2.18   0
   7 -17  -2   17.19    1.82   0
   7 -13   0   77.84    2.37   0
   7 -12   1    8.88    2.07   0
   7 -12   6   85.60    2.17   0
   7 -12   7   18.71    2.36   0
   7 -11   3   24.61    2.18   0
   7 -11   4    1.23    1.76   0
   7 -11   5    8.38    2.30   0
   8 -19   0   47.10    2.60   0
   8 -18   1   16.88    2.05   0
   8 -17   1   48.57    2.44   0
   8 -17   2    8.18    1.93   0
   8 -16   3  140.54    3.10   0
   8 -16   4    6.02    2.74   0
 -12  -5   1    1.06    2.18   0
 -12  -4   2   16.31    2.66   0
 -12  -3   3   40.93    2.71   0
 -12  -2   4    4.96    1.85   0
 -11  -8  -2    2.03    2.47   0
 -11  -6  -1   12.21    2.23   0
 -11  -3   1    3.57    1.66   0
 -11  -2   2   11.44    1.57   0
 -11   0   6  276.54    3.68   0
 -10  -8  -3   13.99    2.11   0
 -10  -6  -2  132.16    2.51   0
 -10  -3   0  145.62    2.68   0
 -10  -1   2    0.57    2.25   0
 -10   0   3    1.00    1.62   0
  -9  -6  -3    1.29    1.54   0
  -9  -3  -1    5.46    1.96   0
  -9   1   3   62.70    1.85   0
  -9   2   6    4.01    2.05   0
  -8 -13  -6    0.19    2.12   0
  -8  -7  -4    2.35    1.90   0
  -8  -5  -3   -3.48    1.95   0
  -8  -2  -1   67.55    2.40   0
  -8   1   2  212.20    2.92   0
  -7 -11  -6    7.98    1.61   0
  -7  -8  -5   22.72    1.70   0
  -7  -6  -4   22.50    2.14   0
  -7  -4  -3  154.39    2.55   0
  -7  -1  -1   24.40    1.44   0
  -7   0   0  816.23    4.39   0
  -7   1   1   26.85    1.48   0
  -7   3   5    0.71    1.80   0
  -6 -14  -7   21.37    2.48   0
  -6 -10  -6   27.12    2.35   0
  -6  -7  -5    4.93    1.56   0
  -6  -5  -4   44.73    2.08   0
  -6  -3  -3  196.67    2.31   0
  -5 -12  -7   21.84    1.79   0
  -5  -9  -6   21.79    2.07   0
  -5   0  -1   -0.62    1.33   0
  -5   1   0   53.34    1.81   0
  -5   1  13    1.03    2.87   0
  -5   3  10  252.76    8.02   0
  -4 -16  -8   47.57    2.21   0
  -4  -6  -5  291.52    2.93   0
  -4  -4  -4  322.18    3.10   0
  -4  -1  -2 2029.85    7.19   0
  -4   3   3  385.42    4.94   0
  -3 -16  -8    0.98    2.28   0
  -3 -11  -7    7.34    1.50   0
  -3  -8  -6  220.48    2.62   0
  -3   2  11   43.64    2.45   0
  -3   3   9   29.98    2.28   0
  -2 -11  -7   -0.76    1.76   0
  -2  -8  -6   32.30    1.52   0
  -2  -4  -4   44.04    2.23   0
  -2  -1  -2 1829.66    8.25   0
  -2   0  -1   -0.25    2.22   0
  -1 -16  -8   -0.10    1.95   0
  -1  -6  -5    3.94    1.38   0
  -1  -1  13    8.90    2.37   0
  -1   0  12   98.84    2.76   0
  -1   2   9   12.73    2.09   0
   0 -17  -8    9.16    2.32   0
   0  -9  -6  453.49    4.64   0
   0  -2  13   -2.41    2.48   0
   0  -1  12   -3.20    2.23   0
   0   0  11   -0.24    2.03   0
   0   2   5   34.90    1.83   0
   0   2   6    6.32    2.06   0
   1 -19  -8    0.63    2.48   0
   1 -10  -6   58.78    2.72   0
   1   1   7  108.13    2.48   0
   2  -5  -3   42.11    5.53   0
   2  -5  13    3.42    2.68   0
   2  -1   9   -1.93    2.11   0
   2   0   4  571.44    4.30   0
   2   0   6  344.83    3.23   0
   3  -5  -2   42.32    2.38   0
   3  -3   0  533.88    4.86   0
   3  -2   8   69.23    2.40   0
   4 -10  -4    8.91    2.37   0
   4  -3   3  387.47    3.20   0
   4  -3   6   56.60    1.67   0
   5  -8  10  140.08    2.61   0
   5  -7   9   -2.43    1.72   0
   5  -6   8    4.57    1.63   0
   5  -5   3    8.82    1.37   0
   5  -5   6    8.27    1.45   0
   6 -10  -1  132.65    2.54   0
   6 -10   9    1.23    1.82   0
   6  -9   0    4.88    1.79   0
   6  -9   8   34.87    1.81   0
   6  -8   7   -0.36    2.28   0
   6  -7   4    3.52    2.00   0
   6  -7   5    2.66    1.95   0
   7 -19  -3   82.00    2.77   0
   7 -16  -2    3.06    2.33   0
   7 -14  -1    1.95    1.47   0
   7 -11   2   -1.11    1.46   0
   7 -11   6    0.32    1.71   0
   7 -10   4  133.35    2.44   0
   8 -18   0    4.37    2.53   0
   8 -16   1  133.61    2.78   0
   8 -16   2   27.19    2.00   0
   8 -15   2   -0.33    2.12   0
   8 -15   3   55.04    2.72   0
   8 -15   4   11.80    1.89   0
   8 -15   5   67.52    2.90   0
 -12  -2   5   15.90    2.32   0
 -11  -5   0   80.29    2.42   0
 -11  -1   4  104.46    2.27   0
 -11   0   7   -1.98    2.27   0
 -11   0   8  254.27    3.92   0
 -11   0   9    2.37    2.22   0
 -10  -9  -3  128.63    2.87   0
 -10  -5  -1   73.07    2.48   0
 -10  -2   1    2.09    1.63   0
 -10   1   6   42.73    1.91   0
 -10   1   7    5.55    2.49   0
 -10   1   8   -3.03    2.64   0
 -10   1   9   24.52    2.72   0
  -9 -12  -5   -0.74    1.84   0
  -9  -9  -4   11.12    1.56   0
  -9  -7  -3   29.38    2.32   0
  -9  -5  -2    8.44    2.12   0
  -9  -2   0   89.76    1.98   0
  -9  -1   1    5.36    2.04   0
  -9   0   2   -1.62    1.38   0
  -9   2   7   -1.40    2.20   0
  -9   2   8   10.67    2.07   0
  -8 -14  -6   13.36    2.28   0
  -8 -10  -5  166.13    2.41   0
  -8  -1   0  838.18    4.32   0
  -8   0   1    1.55    1.89   0
  -8   2   4   10.33    2.00   0
  -7 -12  -6   88.26    2.35   0
  -7   2   3   10.07    1.83   0
  -6  -2  -2   45.35    1.99   0
  -6   2   2  188.31    2.94   0
  -6   3   4    1.15    1.84   0
  -5 -13  -7   19.27    2.11   0
  -5  -3  -3  873.51    4.41   0
  -4 -18  -8   -1.96    2.68   0
  -4 -17  -8    6.65    1.77   0
  -4 -12  -7  200.44    2.70   0
  -4  -9  -6   67.69    2.29   0
  -4   0  -1    0.35    1.86   0
  -4   0  14   19.14    3.14   0
  -4   1   0  339.07    3.39   0
  -4   1  13   10.70    2.95   0
  -3  -6  -5    3.11    1.64   0
  -3  -4  -4  259.58    2.84   0
  -3  -1  -2  295.91    3.13   0
  -3   0  -1    0.40    1.69   0
  -3   1   0  213.82    3.41   0
  -2 -16  -8   38.36    2.28   0
  -2  -6  -5   62.21    2.13   0
  -2  -1  14   -2.28    2.38   0
  -2   0  13    0.60    2.46   0
  -2   1  12   63.11    2.43   0
  -2   3   8    6.47    1.96   0
  -1  -2  14   -1.41    2.68   0
  -1   1  11   92.48    2.53   0
   0  -2  -2   -0.76    2.47   0
   0   2   4  595.92    5.73   0
   0   2   7   40.94    2.21   0
   1 -20  -8   59.02    3.36   0
   1  -3  13   10.60    2.51   0
   1  -2  12   -0.88    1.76   0
   1  -1  11   17.13    1.97   0
   1   0   1   -0.03    2.94   0
   2  -1   1 1137.98    7.47   0
   2   0   3    1.28    1.84   0
   2   0   7   -1.25    1.35   0
   3  -8  -4  921.66   12.76   0
   3  -5  12    3.96    2.59   0
   3  -4  11   88.19    2.24   0
   3  -3  10   90.31    2.16   0
   3  -1   4    5.37    1.98   0
   3  -1   5  655.37    4.11   0
   3  -1   6   40.60    1.96   0
   4  -8  -3   77.02    2.70   0
   4  -6  11   51.47    2.01   0
   4  -5  10  156.40    2.49   0
   4  -4   9   40.89    2.32   0
   4  -3   7  190.94    2.34   0
   5 -22  -6   -0.20    3.57   0
   5  -7  10  245.97    3.20   0
   5  -6   9   -3.76    1.96   0
   5  -5   2   18.53    1.39   0
   5  -5   7   16.91    1.67   0
   6 -16  -4    1.57    2.03   0
   6  -9   9  136.66    2.99   0
   6  -8   1   22.00    1.48   0
   6  -8   8   18.18    2.46   0
   6  -7   3    2.14    1.40   0
   6  -7   6   33.20    1.65   0
   7 -18  -3    8.71    2.12   0
   7 -15  -2  164.29    3.08   0
   7 -13  -1   58.71    2.12   0
   7 -12   0   11.70    1.59   0
   7 -12   8    4.41    1.90   0
   7 -11   1   55.75    1.85   0
   7 -11   7   -0.07    1.88   0
   7 -10   2    7.36    1.83   0
   7 -10   3    1.81    1.44   0
   7 -10   5    6.91    1.73   0
   7 -10   6   55.98    2.55   0
   8 -20  -1    3.49    2.06   0
   8 -19  -1   10.97    2.22   0
   8 -17   0    2.18    2.49   0
   8 -15   1   -1.43    2.08   0
   8 -14   3   36.19    2.51   0
   8 -14   4    9.02    1.83   0
   8 -14   5   28.15    2.62   0
 -12  -6   1    0.53    1.89   0
 -12  -5   2   19.33    2.74   0
 -12  -4   3   27.17    2.59   0
 -12  -3   4   13.97    2.24   0
 -12  -2   6   -4.86    2.64   0
 -11  -9  -2   20.71    1.91   0
 -11  -7  -1   -1.10    1.76   0
 -11  -4   1   13.33    1.69   0
 -11  -3   2    5.08    2.12   0
 -11  -2   3   26.25    1.83   0
 -11  -1   5   -3.60    2.32   0
 -10  -7  -2    2.41    1.70   0
 -10  -4   0    6.29    2.22   0
 -10   0   4   38.02    2.01   0
  -9 -10  -4    6.29    2.18   0
  -9   1   4  100.02    2.20   0
  -9   1  11    8.59    3.04   0
  -8 -11  -5   68.74    2.34   0
  -8  -8  -4    8.76    1.68   0
  -8  -6  -3   47.53    2.12   0
  -8  -4  -2  562.26    3.54   0
  -7 -13  -6   83.01    2.78   0
  -7  -9  -5   91.51    2.11   0
  -7  -3  -2   11.32    1.45   0
  -7   3   6   42.09    2.40   0
  -7   3   7   33.09    2.87   0
  -7   3   8    0.80    2.44   0
  -6 -16  -7   71.83    2.85   0
  -6 -15  -7    6.40    1.78   0
  -6 -11  -6    0.03    1.63   0
  -6  -8  -5   -0.35    1.40   0
  -6  -4  -3  101.24    2.23   0
  -6  -1  -1   18.53    1.78   0
  -6   1   1    0.30    1.95   0
  -5 -14  -7   29.66    2.36   0
  -5 -10  -6   89.31    2.31   0
  -5  -7  -5  212.74    2.49   0
  -5  -5  -4  195.38    2.58   0
  -5   2  12    6.32    3.14   0
  -4 -13  -7    1.18    2.39   0
  -4   3  10   81.10    3.70   0
  -3 -18  -8   41.60    2.68   0
  -3 -17  -8   10.64    1.82   0
  -3 -12  -7   41.56    1.75   0
  -3  -9  -6  266.87    3.23   0
  -2 -17  -8   33.05    2.62   0
  -2 -12  -7  100.42    2.57   0
  -1 -17  -8   28.25    2.16   0
  -1 -12  -7    9.95    1.49   0
  -1  -9  -6  354.32    3.72   0
   0 -18  -8    6.80    2.15   0
   0  -7  -5  251.00    3.75   0
   0  -5  -4   81.87    2.89   0
   0   1  10   72.69    2.17   0
   0   2   8  100.05    2.56   0
   1 -21  -8    2.46    2.79   0
   1   0  10    8.00    1.58   0
   1   1   3  106.83    2.60   0
   1   1   8   21.93    1.42   0
   2  -4  13   58.60    2.84   0
   2  -3  12   -2.06    1.76   0
   2  -2  11    0.90    1.65   0
   2  -1  10   41.34    2.31   0
   2   0   8  498.90    3.78   0
   3  -2   1  123.39    2.64   0
   3  -2   9  534.05    3.67   0
   3  -1   3   42.96    2.20   0
   3  -1   7  748.11    4.26   0
   4  -3   2  792.20    4.58   0
   4  -3   8  242.91    2.61   0
   5 -21  -6  130.89    5.80   0
   5 -10  -3  368.57    4.27   0
   5  -8  11    0.67    1.88   0
   5  -7  -1  644.70    4.74   0
   5  -6   0    3.70    2.00   0
   5  -5   8   38.17    1.87   0
   5  -4   4   41.94    2.06   0
   5  -4   5  392.76    3.26   0
   5  -4   6   64.69    2.07   0
   6 -21  -5    7.24    2.94   0
   6 -13  -3   83.40    2.89   0
   6 -11  -2  111.75    2.29   0
   6  -7   2   98.42    1.92   0
   6  -7   7    0.89    1.69   0
   7 -11   8   35.15    2.01   0
   7 -10   7    0.20    1.62   0
   7  -9   3   85.31    2.20   0
   7  -9   4   13.30    2.03   0
   7  -9   5  100.08    2.56   0
   8 -18  -1   -0.88    2.56   0
   8 -16   0   25.61    2.47   0
   8 -14   2    7.93    1.72   0
   8 -14   6   20.50    1.96   0
   8 -13   3   -1.88    2.33   0
   8 -13   4   35.47    1.84   0
   8 -13   5   -0.81    2.56   0
 -11  -8  -1   10.28    2.58   0
 -11  -6   0   69.29    2.38   0
 -10 -10  -3  277.51    2.99   0
 -10  -8  -2  234.66    3.05   0
 -10  -6  -1    4.10    2.28   0
 -10  -3   1   61.61    2.43   0
 -10  -2   2    0.45    2.21   0
 -10  -1   3   -0.59    1.76   0
 -10   0   5    2.64    2.26   0
  -9 -11  -4   -5.17    2.59   0
  -9  -8  -3  124.78    2.23   0
  -9  -6  -2  202.90    2.94   0
  -9  -4  -1  914.56    4.19   0
  -9   0   3   -1.29    2.00   0
  -8 -12  -5   22.27    2.42   0
  -8  -9  -4   20.01    2.33   0
  -8  -3  -1  223.16    2.81   0
  -8   1   3    9.30    1.94   0
  -8   2   5  237.78    3.26   0
  -8   2  10    0.71    2.69   0
  -7 -14  -6   81.23    2.86   0
  -7 -10  -5   10.90    2.01   0
  -7  -7  -4   33.27    1.73   0
  -7  -5  -3    4.40    1.41   0
  -7  -2  -1  375.26    3.09   0
  -7   1   2   18.51    1.91   0
  -6 -12  -6   13.15    2.25   0
  -6  -6  -4  156.77    2.16   0
  -6   0   0   75.41    1.79   0
  -6   3   5   25.41    2.49   0
  -5 -15  -7    1.98    2.27   0
  -5  -2  -2   35.70    2.00   0
  -5   2   2   33.37    2.41   0
  -5   3   4    0.41    1.87   0
  -4  -7  -5    4.79    1.67   0
  -4  -3  -3  392.13    3.25   0
  -4   2  12   27.80    2.82   0
  -3 -19  -8    3.49    2.69   0
  -3 -13  -7    2.95    1.98   0
  -3   0  14   17.35    2.50   0
  -3   1  13    9.43    2.84   0
  -2 -18  -8    2.35    2.34   0
  -2  -9  -6   71.77    2.08   0
  -2   2  11   25.55    2.21   0
  -2   3   9   16.44    2.48   0
  -1 -18  -8   14.58    2.40   0
  -1  -3  -3 1692.96    8.51   0
  -1   2  10   19.46    2.32   0
  -1   3   6  516.41    5.51   0
   0 -19  -8   18.29    2.58   0
   0 -13  -7   94.66    2.89   0
   0  -1  13   17.50    2.23   0
   1 -14  -7   10.97    2.17   0
   1   1   9    1.43    1.86   0
   3  -4  12    5.85    2.56   0
   3  -3  11   29.31    2.55   0
   3  -1   8  212.04    3.04   0
   4  -6  12    1.36    2.67   0
   4  -5  -1   12.91    2.13   0
   4  -5  11   22.81    2.00   0
   4  -4   0    0.16    1.95   0
   4  -4  10   -0.92    1.64   0
   4  -3   9  273.72    2.90   0
   4  -2   4  201.57    2.79   0
   4  -2   5    3.91    1.42   0
   4  -2   6   32.49    1.52   0
   5 -15  -5   86.83    3.48   0
   5 -12  -4  225.11    3.97   0
   5  -8  -2  213.41    3.27   0
   5  -7  11   -2.04    2.52   0
   5  -6  10    0.91    2.40   0
   5  -5   1   47.16    1.79   0
   5  -5   9   10.47    2.02   0
   5  -4   3  581.95    3.61   0
   5  -4   7   35.02    2.15   0
   6 -20  -5   -0.65    2.80   0
   6  -9  -1  610.55    4.27   0
   6  -9  10    2.43    1.87   0
   6  -8   0  159.69    2.30   0
   6  -8   9    0.72    1.81   0
   6  -7   1  177.25    2.63   0
   6  -7   8   39.15    1.84   0
   6  -6   3   24.39    1.92   0
   6  -6   4  157.04    2.19   0
   6  -6   5   67.86    1.76   0
   6  -6   6  154.67    2.20   0
   7 -17  -3   82.71    2.89   0
   7 -14  -2   39.44    2.24   0
   7 -12  -1  116.29    2.64   0
   7 -11   0    9.67    1.68   0
   7 -10   1    2.38    1.69   0
   7 -10   8    1.70    1.75   0
   7  -9   2    2.51    2.14   0
   7  -9   6   86.42    2.07   0
   7  -9   7    3.23    2.00   0
   8 -17  -1  166.29    3.25   0
   8 -15   0    3.61    2.38   0
   8 -14   1   75.67    2.14   0
   8 -13   2   21.32    1.73   0
   8 -13   6   -3.45    1.90   0
   8 -12   3   46.00    2.20   0
   8 -12   4    6.06    2.33   0
   8 -12   5   22.51    2.55   0
 -12  -7   1   35.38    2.12   0
 -12  -6   2    5.26    2.58   0
 -12  -5   3   20.14    2.62   0
 -12  -4   4   41.86    2.67   0
 -12  -3   5  102.44    2.47   0
 -11  -5   1   65.40    1.97   0
 -11  -4   2    6.96    2.31   0
 -11  -3   3   15.05    2.41   0
 -11  -2   4   -0.21    1.74   0
 -11  -1   6   78.81    2.32   0
 -10 -11  -3   34.01    2.38   0
  -9  -3   0  303.78    2.75   0
  -9  -2   1   24.62    2.03   0
  -9  -1   2   39.54    2.02   0
  -9   1   5   65.45    2.01   0
  -8 -13  -5   -3.65    2.62   0
  -8  -7  -3   54.61    2.14   0
  -8  -5  -2   11.61    2.12   0
  -8  -2   0   57.17    2.16   0
  -8  -1   1    7.58    2.05   0
  -8   0   2   71.86    2.40   0
  -8   1  12   -1.73    3.91   0
  -8   2   6   21.25    2.51   0
  -7 -15  -6   -1.40    2.61   0
  -7  -8  -4  211.53    2.71   0
  -7  -1   0   62.51    1.72   0
  -7   0   1    0.23    1.68   0
  -7   2   4   28.63    2.01   0
  -6  -9  -5   14.23    1.45   0
  -6  -3  -2   80.68    2.15   0
  -5 -16  -7    9.11    2.62   0
  -5 -11  -6   35.46    1.66   0
  -5  -8  -5  156.74    2.28   0
  -5  -1  -1   22.57    2.04   0
  -4 -14  -7  123.28    2.34   0
  -4 -10  -6   16.97    1.77   0
  -4  -5  -4  312.75    2.81   0
  -3  -7  -5  187.21    2.76   0
  -3  -3  -3 2639.76    8.38   0
  -3   3  10   -0.11    2.58   0
  -2 -19  -8   17.07    2.23   0
  -2 -13  -7  148.91    2.83   0
  -2  -3  -3  195.66    3.06   0
  -1 -19  -8    7.01    2.49   0
  -1 -13  -7    8.55    2.04   0
  -1  -7  -5   29.21    2.15   0
  -1  -1  14   25.04    2.74   0
  -1   0  13   -0.57    2.39   0
  -1   1  12   44.07    2.28   0
  -1   3   7 1246.79    7.66   0
   0 -20  -8    1.75    2.33   0
   0 -10  -6   22.71    2.03   0
   0  -2  14    3.20    2.66   0
   0   0  12   75.82    2.18   0
   0   1  11   86.55    2.45   0
   0   2   9   98.12    2.62   0
   1  -8  -5  117.17    3.56   0
   1  -2  13   44.17    2.14   0
   1  -1  12  138.99    2.54   0
   1   0  11    1.19    2.39   0
   2 -16  -7    9.67    2.65   0
   2  -3  13   37.62    2.43   0
   2  -2  12   42.93    2.61   0
   2   0   9   -2.29    1.57   0
   3  -2  10   16.66    1.82   0
   4 -12  -5  351.97    7.57   0
   4  -6  -2  137.27    3.13   0
   4  -3   1   21.71    2.11   0
   4  -2   3  309.46    3.31   0
   4  -2   7    2.15    1.58   0
   5  -4   2   91.81    2.23   0
   5  -4   8   53.75    2.19   0
   6 -15  -4    2.59    1.91   0
   6 -12  -3  135.63    3.20   0
   6  -8  10   20.55    2.55   0
   6  -7   9   17.98    2.32   0
   6  -6   2  171.80    2.55   0
   6  -6   7  232.73    2.63   0
   7 -21  -4    1.74    2.83   0
   7 -16  -3  174.54    3.25   0
   7  -9   8   72.58    2.62   0
   7  -8   3    9.26    2.12   0
   7  -8   4  190.94    2.33   0
   7  -8   5   23.69    1.68   0
   7  -8   6  300.38    3.24   0
   8 -20  -2    0.88    1.88   0
   8 -19  -2    9.69    2.23   0
   8 -16  -1   17.23    2.40   0
   8 -14   0   -2.36    2.02   0
   8 -13   1    4.90    2.34   0
   8 -12   2   -3.79    2.34   0
   8 -12   6    9.22    1.88   0
   8 -12   7    0.91    2.34   0
   8 -11   4    3.44    2.10   0
 -12  -3   6   13.09    2.43   0
 -11  -9  -1   12.50    1.99   0
 -11  -7   0   26.74    2.07   0
 -11  -2   5   14.39    2.50   0
 -11  -1   7    3.52    1.91   0
 -11  -1   8   -1.91    2.62   0
 -11  -1   9   24.74    2.88   0
 -10 -12  -3    9.84    2.58   0
 -10  -9  -2    8.89    1.92   0
 -10  -7  -1   -2.53    2.40   0
 -10  -5   0   -0.60    1.62   0
 -10  -4   1   41.03    2.48   0
 -10  -1   4   65.40    2.45   0
 -10   0   6    7.66    2.06   0
  -9 -12  -4   23.53    1.93   0
  -9  -9  -3   34.82    1.95   0
  -9  -7  -2   66.00    2.41   0
  -9  -5  -1  205.53    2.46   0
  -9   1   6    3.62    2.12   0
  -9   1  10   64.76    3.50   0
  -8 -14  -5   33.41    2.61   0
  -8 -10  -4   -0.67    1.64   0
  -8   2   9   29.17    2.98   0
  -7 -16  -6   -0.96    2.63   0
  -7 -11  -5    7.23    1.62   0
  -7  -6  -3   10.21    1.46   0
  -7  -4  -2   51.15    1.76   0
  -7   2  11   51.37    5.03   0
  -6 -13  -6   66.55    2.01   0
  -6  -7  -4   -0.89    1.50   0
  -6  -5  -3   40.61    1.94   0
  -6   2   3 2686.80    9.08   0
  -5 -17  -7   -2.36    2.45   0
  -5  -6  -4   18.44    1.51   0
  -5  -4  -3  624.39    3.67   0
  -5   0   0   17.23    2.04   0
  -5   1   1  161.82    2.60   0
  -4 -15  -7   -2.44    2.05   0
  -4  -2  -2  186.70    2.54   0
  -4   2   2   24.14    2.19   0
  -3 -14  -7   69.25    2.67   0
  -3 -10  -6   12.79    1.63   0
  -3  -5  -4   21.79    1.57   0
  -3   2  12   26.27    2.55   0
  -2 -20  -8   31.68    2.17   0
  -2  -7  -5   22.00    1.54   0
  -2  -5  -4 1384.77    6.59   0
  -1 -20  -8   21.29    2.34   0
  -1  -5  -4   66.91    2.54   0
  -1   3   5 1293.61    9.50   0
  -1   3   8   58.17    2.47   0
   0 -21  -8    2.08    2.35   0
   0  -1  -1  299.59    8.11   0
   1   2   6    6.11    2.04   0
   2  -9  -5   15.73    2.70   0
   2  -1  11   17.29    1.74   0
   2   0   2   51.36    1.99   0
   2   1   5   11.82    1.66   0
   2   1   6  647.61    4.27   0
   2   1   7  166.19    2.72   0
   3 -19  -7   11.38    3.49   0
   3  -6  -3  872.01    9.38   0
   3  -3  12    6.17    2.29   0
   3  -1   2  284.46    3.16   0
   3  -1   9    2.31    1.54   0
   3   0   5   -0.92    1.82   0
   3   0   6  270.57    2.92   0
   4  -5  12  149.02    3.23   0
   4  -4  11    3.63    1.73   0
   4  -3  10   12.82    2.33   0
   4  -2   8   48.19    1.94   0
   5 -20  -6   20.22    4.18   0
   5  -6  11   14.20    1.83   0
   5  -5  10   23.08    1.78   0
   5  -4   9    6.57    2.00   0
   5  -3   4  132.64    2.38   0
   5  -3   5  165.18    2.14   0
   5  -3   6   -3.26    1.94   0
   6 -19  -5   69.39    3.77   0
   6 -10  -2   10.27    1.54   0
   6  -6   8   66.05    1.99   0
   6  -5   4   53.35    2.25   0
   6  -5   5    5.27    1.35   0
   6  -5   6   13.77    2.09   0
   7 -20  -4   13.91    2.41   0
   7 -13  -2   45.22    2.20   0
   7 -11  -1   37.80    2.31   0
   7 -10   0   66.05    1.89   0
   7  -9   1   77.07    1.98   0
   7  -8   2  102.80    2.27   0
   7  -8   7   53.89    1.94   0
   8 -18  -2   35.64    2.86   0
   8 -15  -1   54.19    2.34   0
   8 -12   1  112.13    2.75   0
   8 -11   3   33.98    1.90   0
   8 -11   5   54.39    1.95   0
   8 -11   6    9.71    1.81   0
   8 -11   7   76.78    2.56   0
   9 -16   2   17.66    2.34   0
 -12  -7   2   26.75    2.07   0
 -12  -6   3   -1.76    2.54   0
 -12  -5   4   15.28    2.58   0
 -12  -4   5    1.15    2.27   0
 -11 -10  -1   51.65    2.50   0
 -11  -8   0   -6.23    2.59   0
 -11  -6   1    4.28    1.66   0
 -11  -5   2   16.47    2.36   0
 -11  -3   4   17.29    2.42   0
 -10 -10  -2   81.50    2.87   0
 -10  -3   2   47.41    1.96   0
 -10  -2   3   -3.50    1.72   0
 -10   0   7    1.19    2.12   0
 -10   0   8   12.39    2.55   0
 -10   0   9   -0.49    2.63   0
 -10   0  10    7.12    2.35   0
  -9 -13  -4   93.60    2.35   0
  -9 -10  -3    7.72    2.11   0
  -9  -4   0    8.11    1.57   0
  -9   0   4  765.11    4.44   0
  -9   1   7   43.45    2.59   0
  -8 -15  -5   63.07    2.82   0
  -8 -11  -4    1.51    2.31   0
  -8  -8  -3   -1.86    1.95   0
  -8  -6  -2   30.60    2.21   0
  -8  -4  -1   86.76    1.90   0
  -8   1   4   14.46    1.68   0
  -8   2   7  184.92    3.30   0
  -8   2   8    5.07    2.40   0
  -7 -12  -5    7.07    1.68   0
  -7  -9  -4   15.92    1.99   0
  -7  -3  -1  829.00    4.22   0
  -6 -14  -6    2.98    1.69   0
  -6 -10  -5  107.07    2.00   0
  -6  -2  -1   12.40    1.24   0
  -6   3   6  149.32    3.24   0
  -6   3   9  212.18    6.27   0
  -5 -18  -7  147.83    3.06   0
  -5  -9  -5   21.12    1.57   0
  -4 -16  -7   96.31    2.83   0
  -4 -11  -6   21.20    1.67   0
  -4  -8  -5    1.91    1.44   0
  -4   3   4  775.67    7.76   0
  -3 -15  -7    5.64    2.31   0
  -3  -2  -2  202.62    2.96   0
  -2 -14  -7    7.57    2.12   0
  -2 -10  -6   58.00    1.75   0
  -2   0  14   30.34    2.76   0
  -2   1  13   13.54    2.54   0
  -1 -14  -7  217.43    3.29   0
  -1 -10  -6  201.13    3.04   0
  -1   2  11   10.29    2.00   0
   0 -14  -7  107.33    2.73   0
   0   2   3  295.66    5.03   0
   1 -15  -7    6.95    2.17   0
   1 -11  -6   31.88    2.11   0
   1  -6  -4   31.46    2.91   0
   1   1  10  231.73    2.82   0
   1   2   5    4.72    1.99   0
   1   2   7   60.65    1.82   0
   2 -12  -6    5.00    2.42   0
   2   0  10  401.02    3.38   0
   2   1   4 1086.82    6.05   0
   2   1   8  544.14    3.94   0
   3  -2  11  190.76    2.61   0
   3  -1  10  192.89    2.97   0
   3   0   4  442.51    3.61   0
   3   0   7    0.08    1.36   0
   4  -2   2  183.33    2.90   0
   4  -2   9   32.16    2.05   0
   4  -1   5    3.07    1.69   0
   4  -1   6   37.77    2.00   0
   5  -6  -1  248.35    3.39   0
   5  -5   0   34.01    2.11   0
   5  -3   3  825.66    4.37   0
   5  -3   7   75.03    1.92   0
   6 -14  -4   44.72    2.65   0
   6  -8  -1    3.29    1.84   0
   6  -7   0  678.17    4.18   0
   6  -7  10   12.32    1.86   0
   6  -6   1  394.08    3.43   0
   6  -6   9   28.39    1.81   0
   6  -5   3   35.15    1.51   0
   6  -5   7   40.22    1.79   0
   7 -19  -4    4.67    2.24   0
   7 -15  -3   57.06    2.70   0
   7  -9   9   11.67    1.90   0
   7  -8   8   41.34    1.95   0
   7  -7   3   44.06    1.99   0
   7  -7   4   38.01    1.70   0
   7  -7   5   38.93    1.63   0
   7  -7   6    8.19    1.79   0
   8 -17  -2    4.41    2.58   0
   8 -13   0   41.79    2.05   0
   8 -11   2   29.22    1.87   0
   8 -10   3  264.15    3.03   0
   8 -10   4    0.49    1.51   0
   8 -10   5  174.74    2.50   0
   8 -10   6    3.99    2.47   0
   9 -17   1   10.29    2.03   0
   9 -15   2   -0.85    2.25   0
   9 -15   3   15.86    1.87   0
   9 -14   4   38.36    2.66   0
 -11  -7   1   27.78    2.62   0
 -11  -4   3   36.27    1.96   0
 -11  -2   6   23.93    2.45   0
 -10  -8  -1   15.26    1.84   0
 -10  -6   0  148.76    2.30   0
 -10  -1   5    2.26    2.14   0
  -9 -14  -4   26.62    2.04   0
  -9 -11  -3   78.56    2.66   0
  -9  -8  -2   99.27    2.16   0
  -9  -6  -1   89.63    2.07   0
  -9  -3   1   12.87    1.52   0
  -9  -2   2   78.42    2.29   0
  -9  -1   3   60.08    1.92   0
  -9   1   8   76.16    2.81   0
  -9   1   9   13.29    2.56   0
  -8  -3   0  744.17    4.04   0
  -8   0   3   -1.38    2.05   0
  -7 -13  -5   35.36    2.31   0
  -7  -7  -3   38.48    2.29   0
  -7  -5  -2   17.55    2.12   0
  -7  -2   0   31.35    2.04   0
  -7   1   3  181.19    2.49   0
  -7   2   5   -0.02    1.88   0
  -6 -15  -6   17.45    1.85   0
  -6 -11  -5    6.65    1.99   0
  -6  -8  -4   40.35    2.02   0
  -6  -4  -2  283.98    2.99   0
  -6  -1   0  306.72    2.92   0
  -6   0   1    0.24    1.94   0
  -6   1   2  175.18    2.52   0
  -5 -13  -6   52.16    1.97   0
  -5  -7  -4  731.46    4.11   0
  -5  -3  -2   22.88    1.46   0
  -4 -17  -7    2.81    2.55   0
  -4 -12  -6   -4.22    2.00   0
  -4  -6  -4   79.99    1.80   0
  -4  -4  -3   11.27    1.40   0
  -4  -1  -1   86.18    2.09   0
  -4   1   1   -0.26    1.57   0
  -3 -11  -6    2.96    2.12   0
  -3  -8  -5  171.94    2.61   0
  -3   2   2   14.86    2.03   0
  -2  -2  -2   18.72    1.95   0
  -2   2   2  106.79    4.50   0
  -2   2  12   12.02    2.31   0
  -2   3  10   20.21    2.38   0
  -1  -2  -2    7.60    1.74   0
  -1   3   9  255.06    3.65   0
   0  -1  14   -4.17    2.74   0
   0   0  13   -3.15    2.41   0
   0   1  12   -1.38    2.06   0
   0   2  10   15.13    1.77   0
   1  -1  13   27.50    1.99   0
   1   0  12   16.61    2.44   0
   1   1   2  904.94    7.38   0
   1   2   8   14.16    1.39   0
   2 -17  -7  183.54    4.72   0
   2  -2  13   -0.55    2.62   0
   2  -1  12   36.47    2.56   0
   2   1   9    3.48    1.97   0
   3   0   8 1138.39    5.07   0
   4  -4  12    4.89    2.66   0
   4  -3  11   31.09    2.53   0
   4  -1   4 2162.17    7.02   0
   4  -1   7   -0.74    1.56   0
   5  -9  -3   22.70    2.08   0
   5  -5  11    4.25    1.89   0
   5  -4   1   85.77    2.04   0
   5  -4  10   18.02    1.87   0
   5  -3   8   44.75    1.70   0
   6 -18  -5   69.70    3.38   0
   6  -6  10   -1.91    2.59   0
   6  -5   2   72.70    2.17   0
   6  -5   8  140.89    2.31   0
   6  -4   5  253.08    2.87   0
   6  -4   6  274.79    3.03   0
   7 -12  -2   15.20    2.10   0
   7  -9   0    0.80    1.98   0
   7  -8   1   35.36    2.18   0
   7  -8   9    5.93    1.84   0
   7  -7   7   70.84    2.09   0
   7  -7   8  128.39    2.65   0
   8 -16  -2    0.67    2.00   0
   8 -14  -1   21.71    2.29   0
   8 -12   0   98.09    2.48   0
   8 -11   1    7.52    2.15   0
   8 -10   2   33.91    2.28   0
   8 -10   7   55.17    2.15   0
   8  -9   4   14.88    2.05   0
   8  -9   5   21.17    2.18   0
   9 -17   0    2.94    2.29   0
   9 -16   1    7.57    1.82   0
   9 -14   2  219.00    3.30   0
   9 -14   3    1.74    1.86   0
   9 -13   4  103.37    2.91   0
   9 -13   5   -2.55    2.61   0
 -12  -7   3   39.19    2.47   0
 -12  -6   4   -2.36    2.62   0
 -12  -5   5   11.08    2.69   0
 -11  -9   0   -3.86    1.84   0
 -11  -6   2   54.40    2.55   0
 -11  -3   5   66.89    2.68   0
 -11  -2   7    9.25    2.30   0
 -10 -11  -2    8.69    1.90   0
 -10  -7   0   35.42    2.51   0
 -10  -5   1   -1.78    1.83   0
 -10  -3   3   92.24    2.68   0
 -10  -2   4    1.64    2.05   0
 -10  -1   6   34.26    2.48   0
  -9  -5   0  342.45    3.25   0
  -9   0   5   -0.49    1.77   0
  -8 -12  -4    2.05    1.74   0
  -8  -9  -3    2.38    1.73   0
  -8  -7  -2   72.11    2.26   0
  -8  -5  -1   34.11    2.12   0
  -8  -2   1  123.57    2.21   0
  -8  -1   2  210.97    2.62   0
  -8   1   5    2.27    1.94   0
  -7 -14  -5    4.29    2.38   0
  -7 -10  -4  132.96    2.21   0
  -7  -1   1   19.52    1.55   0
  -7   0   2 1111.78    5.13   0
  -6 -16  -6   52.45    2.18   0
  -6  -6  -3   19.49    1.45   0
  -6   2   4  245.30    3.49   0
  -6   3   7   59.25    3.18   0
  -6   3   8  182.51    4.77   0
  -5 -14  -6  334.71    3.28   0
  -5 -10  -5    3.88    1.63   0
  -5  -5  -3    7.50    1.44   0
  -5   2   3   11.64    2.24   0
  -5   3   5    0.55    1.86   0
  -4 -18  -7   -2.62    2.31   0
  -4  -9  -5    6.63    1.90   0
  -4   0   0   12.00    1.41   0
  -4   1  14    4.90    3.05   0
  -4   3  11   18.38    3.39   0
  -3 -16  -7   34.10    1.98   0
  -3  -4  -3   37.41    2.15   0
  -2 -15  -7  158.86    2.72   0
  -2 -11  -6   12.20    1.98   0
  -2  -8  -5  410.17    3.76   0
  -1 -15  -7   25.06    2.13   0
  -1   0  14    8.02    2.63   0
  -1   1  13    2.38    2.19   0
   0 -15  -7  187.06    3.36   0
   0  -8  -5   20.51    2.08   0
   0   3   6  478.32    4.70   0
   0   3   7   15.78    1.99   0
   1   1  11   15.49    2.45   0
   1   2   4   45.38    1.87   0
   1   2   9  230.69    3.21   0
   2   0  11   -3.80    1.77   0
   2   1   3  331.24    3.76   0
   3 -20  -7    0.23    3.66   0
   3  -3  -1   91.64    2.81   0
   3  -2   0   22.12    1.60   0
   3  -2  12   -4.28    1.97   0
   3  -1  11   90.71    2.68   0
   3   0   3    0.48    1.43   0
   3   0   9    0.94    1.56   0
   4  -2  10   49.51    1.88   0
   4  -1   3   23.06    2.08   0
   4  -1   8  220.75    2.61   0
   5 -19  -6    0.21    4.40   0
   5 -14  -5    0.90    2.39   0
   5 -11  -4    9.79    1.90   0
   5  -7  -2  481.36    4.51   0
   5  -3   2   19.56    1.48   0
   5  -3   9  125.87    2.27   0
   5  -2   4    0.29    1.85   0
   5  -2   5  949.57    4.33   0
   5  -2   6  117.11    2.09   0
   5  -2   7  427.84    3.57   0
   6 -11  -3  577.27    5.05   0
   6  -9  -2   51.55    2.10   0
   6  -5   9  124.76    2.32   0
   6  -4   4  242.39    2.51   0
   6  -4   7   17.54    1.49   0
   7 -18  -4   -0.91    2.54   0
   7 -14  -3   47.77    2.47   0
   7 -10  -1   18.54    1.62   0
   7  -7   2   95.90    1.95   0
   7  -7   9   84.90    2.57   0
   7  -6   4   27.43    1.55   0
   7  -6   5   -4.17    1.41   0
   7  -6   6   -0.96    1.59   0
   7  -6   7    7.91    2.23   0
   8 -13  -1   23.21    2.22   0
   8  -9   3    5.37    2.25   0
   8  -9   6   24.17    1.72   0
   8  -9   7   79.81    2.70   0
   9 -16   0   10.27    2.22   0
   9 -15   1   59.01    2.21   0
   9 -13   3   42.95    2.11   0
   9 -12   4   29.92    2.40   0
   9 -12   5    9.37    2.30   0
 -11 -10   0   11.99    2.25   0
 -11  -8   1   11.69    2.35   0
 -11  -5   3   16.30    1.78   0
 -11  -4   4   42.05    1.91   0
 -11  -2   8   -2.07    2.29   0
 -11  -2   9    0.74    2.67   0
 -10 -12  -2   19.37    1.99   0
  -9 -12  -3    7.47    1.95   0
  -9  -7  -1   70.40    2.03   0
  -9  -4   1  194.70    2.79   0
  -9  -1   4   99.46    2.68   0
  -8 -13  -4   40.62    1.79   0
  -8 -10  -3  277.66    3.27   0
  -7 -15  -5    7.85    2.41   0
  -7 -11  -4   -1.54    2.32   0
  -7  -8  -3    5.97    1.94   0
  -7  -4  -1  277.23    2.96   0
  -7   2   6   13.88    2.45   0
  -6 -18  -6    5.59    2.67   0
  -6 -17  -6    8.13    1.86   0
  -6 -12  -5  251.35    2.81   0
  -6  -9  -4   32.43    2.30   0
  -6  -3  -1   21.10    1.77   0
  -5 -15  -6   14.78    2.36   0
  -5  -2  -1   65.55    1.80   0
  -4 -19  -7    3.04    1.92   0
  -4 -13  -6   -1.51    1.80   0
  -4  -3  -2  866.04    4.89   0
  -3 -17  -7   13.32    1.86   0
  -3 -12  -6  249.17    3.30   0
  -3  -6  -4  537.66    3.80   0
  -3  -1  -1  145.15    2.49   0
  -3   1  14   53.67    3.14   0
  -3   3   4  472.00    8.44   0
  -3   3  11   15.23    2.37   0
  -2 -16  -7   22.72    2.39   0
  -1 -11  -6  440.33    4.11   0
  -1  -8  -5  183.04    3.11   0
  -1   2  12   -0.65    1.97   0
  -1   3  10   60.25    2.79   0
   0 -11  -6    7.36    1.76   0
   0   2  11    3.64    2.25   0
   0   3   8   15.93    1.41   0
   1 -16  -7   52.59    2.74   0
   2  -1   0  839.98    7.46   0
   2   1  10   47.61    2.31   0
   3  -1   1  150.78    2.67   0
   3   0  10  281.41    3.14   0
   3   1   6   39.90    2.07   0
   3   1   7  749.41    4.26   0
   4  -9  -4  451.54    6.51   0
   4  -7  -3   -0.93    1.85   0
   4  -4  -1   68.61    2.34   0
   4  -3   0    0.10    1.45   0
   4  -3  12    7.97    2.59   0
   4  -2   1  589.17    4.49   0
   4  -2  11   26.65    2.25   0
   4  -1   9    1.47    1.43   0
   5  -4  11   22.57    1.98   0
   5  -3  10   27.59    2.33   0
   5  -2   8   -0.75    1.44   0
   6 -17  -5   30.69    2.80   0
   6  -6   0    7.23    1.98   0
   6  -5   1   33.59    2.05   0
   6  -5  10   66.57    2.72   0
   6  -4   3   89.97    1.83   0
   6  -4   8  125.83    2.29   0
   7 -17  -4    1.14    2.03   0
   7  -8   0  330.03    3.40   0
   7  -7   1  150.35    2.61   0
   7  -6   3   12.47    1.56   0
   7  -6   8   -0.84    2.25   0
   8 -19  -3    8.84    2.62   0
   8 -15  -2   11.89    2.32   0
   8 -11   0  141.24    2.60   0
   8 -10   1  131.05    2.28   0
   8  -9   2   14.31    2.02   0
   8  -9   8   42.81    2.13   0
   8  -8   4    1.17    2.33   0
   8  -8   5    2.11    1.75   0
   8  -8   6   -1.46    2.32   0
   9 -18  -1   37.87    2.87   0
   9 -15   0   28.13    2.29   0
   9 -14   1    2.22    1.88   0
   9 -13   2   27.97    1.95   0
   9 -12   3    4.12    2.00   0
 -12  -7   4   59.84    2.91   0
 -12  -6   5   -1.51    2.68   0
 -11 -11   0   -0.08    2.66   0
 -11  -7   2    0.80    2.25   0
 -11  -3   6   17.98    1.98   0
 -10 -13  -2   47.48    2.09   0
 -10 -10  -1  335.40    3.05   0
 -10  -8   0   46.81    2.37   0
 -10  -6   1   -1.63    1.79   0
 -10  -5   2    1.43    2.34   0
 -10  -2   5   93.20    2.86   0
 -10  -1   7    9.80    2.29   0
  -9 -13  -3   50.73    2.16   0
  -9 -10  -2   -2.32    1.73   0
  -9  -8  -1  144.04    2.83   0
  -9  -6   0    6.70    2.02   0
  -9  -3   2    5.58    1.48   0
  -9  -2   3   21.72    2.02   0
  -9   0   6 1159.15    5.99   0
  -8 -14  -4   17.69    1.81   0
  -8  -8  -2   43.78    2.13   0
  -8  -6  -1   19.07    2.16   0
  -8  -4   0  946.39    4.46   0
  -8   0   4    2.41    2.10   0
  -8   1   6    5.03    2.38   0
  -7 -16  -5   23.67    2.34   0
  -7  -6  -2  395.10    2.99   0
  -7   1   4    0.73    1.93   0
  -6 -13  -5   22.69    1.82   0
  -6  -7  -3   -3.94    1.82   0
  -6  -5  -2   73.87    2.11   0
  -5 -16  -6   -3.36    2.38   0
  -5 -11  -5   21.72    1.57   0
  -5  -8  -4  452.13    3.23   0
  -5  -4  -2   95.91    2.26   0
  -5  -1   0   53.87    2.29   0
  -5   1   2    5.03    2.21   0
  -4 -14  -6   60.68    2.41   0
  -4 -10  -5  756.77    4.46   0
  -4  -7  -4   21.70    1.51   0
  -4  -5  -3  147.46    2.56   0
  -4   2  13   68.77    3.67   0
  -3 -19  -7   18.20    2.62   0
  -3 -18  -7  120.29    2.65   0
  -3  -9  -5   65.10    2.02   0
  -3   0   0  308.22    3.69   0
  -3   1   1   77.92    2.30   0
  -3   2  13    8.04    2.86   0
  -2 -17  -7   18.84    2.35   0
  -2  -6  -4   79.55    2.57   0
  -2  -4  -3   40.88    2.02   0
  -2  -1  -1 1299.06    7.74   0
  -2   1  14    2.23    2.39   0
  -2   3  11   17.43    2.16   0
  -1 -16  -7   40.30    2.30   0
  -1   3   4 1237.71   11.01   0
   0 -16  -7   15.93    2.33   0
   0  -4  -3   48.56    2.56   0
   0   0  14   17.02    2.46   0
   0   3   5   23.81    2.25   0
   0   3   9   63.68    2.43   0
   1   0  13    2.20    1.93   0
   1   1  12  143.78    3.01   0
   1   2  10   46.23    1.88   0
   2 -18  -7   59.20    3.33   0
   2  -2  -1  380.19    6.12   0
   2  -1  13   41.16    2.09   0
   2   0  12   25.46    2.50   0
   2   2   6   41.05    1.73   0
   2   2   7  613.20    4.06   0
   2   2   8    8.69    1.95   0
   3 -21  -7    9.62    3.36   0
   3  -1  12   18.27    2.33   0
   3   1   5  667.11    4.24   0
   3   1   8  207.86    2.98   0
   4  -1  10  118.33    2.78   0
   4   0   5    0.00    1.66   0
   4   0   6  769.07    4.10   0
   4   0   7   -0.99    1.51   0
   5  -4   0   54.93    2.32   0
   5  -2   3  504.84    3.37   0
   5  -2   9   45.71    2.55   0
   6 -13  -4   36.67    2.37   0
   6  -7  -1 1082.46    5.51   0
   6  -4   2  282.03    3.07   0
   6  -4   9    9.08    1.70   0
   6  -3   4   64.39    2.20   0
   6  -3   5   58.61    1.81   0
   6  -3   6   -0.92    1.59   0
   6  -3   7   38.68    2.13   0
   7 -13  -3    1.39    1.81   0
   7 -11  -2    1.03    1.63   0
   7  -9  -1   78.96    2.51   0
   7  -6   2  390.15    3.35   0
   7  -6   9   13.11    2.48   0
   7  -5   4   40.63    2.29   0
   7  -5   5   26.94    1.59   0
   7  -5   6   22.43    1.63   0
   7  -5   7    3.40    2.36   0
   8 -18  -3   20.29    1.93   0
   8 -14  -2    7.40    2.15   0
   8 -12  -1   56.49    2.48   0
   8  -8   3    2.85    1.60   0
   8  -8   7   -2.21    1.93   0
   8  -8   8   16.57    2.67   0
   9 -17  -1   16.48    1.99   0
   9 -13   1   50.58    1.99   0
   9 -12   2   40.17    1.95   0
   9 -11   3   76.70    2.66   0
   9 -11   4    2.47    1.86   0
   9 -11   5   -2.57    1.82   0
 -11  -9   1   33.72    1.98   0
 -11  -6   3   35.20    1.89   0
 -11  -5   4    9.47    2.11   0
 -11  -4   5    1.06    1.79   0
 -11  -3   7   -2.92    2.60   0
 -10 -11  -1    7.00    2.22   0
 -10  -7   1   14.35    2.32   0
 -10  -4   3   11.64    1.69   0
 -10  -3   4    4.21    1.81   0
 -10  -1   8    4.07    2.13   0
 -10  -1   9   16.20    2.74   0
 -10  -1  10    1.99    2.61   0
  -9 -15  -3    1.63    2.60   0
  -9 -14  -3    5.32    1.87   0
  -9 -11  -2   25.83    2.50   0
  -9   0   7    0.75    2.38   0
  -9   0  11   -0.76    2.87   0
  -8 -16  -4    4.22    2.55   0
  -8 -15  -4   10.09    1.87   0
  -8 -11  -3   35.29    1.76   0
  -8  -3   1  223.79    2.59   0
  -8  -2   2   12.68    2.06   0
  -8  -1   3    1.75    2.06   0
  -8   1  11   16.26    3.10   0
  -7 -17  -5    0.91    1.88   0
  -7 -12  -4  167.54    2.48   0
  -7  -9  -3   80.99    1.93   0
  -7  -3   0   39.33    1.62   0
  -7   2   7    0.05    2.37   0
  -6 -14  -5   91.38    2.47   0
  -6 -10  -4  107.31    2.01   0
  -6  -2   0   11.17    1.26   0
  -6   1   3  180.11    2.95   0
  -5 -17  -6   18.51    2.28   0
  -5 -12  -5   -2.80    1.97   0
  -5  -6  -3  350.79    2.98   0
  -5   0   1    0.60    1.40   0
  -3 -20  -7   -3.38    2.38   0
  -3 -13  -6   65.09    2.32   0
  -2 -18  -7   11.25    2.52   0
  -2 -12  -6    2.66    1.51   0
  -2   2  13    1.49    2.25   0
  -1 -17  -7    9.69    2.23   0
  -1  -6  -4  258.00    3.63   0
  -1  -4  -3   46.90    1.83   0
  -1  -1  -1    0.61    2.05   0
   0  -6  -4  505.19    5.32   0
   0   1  13   15.98    2.01   0
   1 -17  -7   62.02    2.85   0
   1 -12  -6   40.35    2.27   0
   2   0   1    0.59    1.66   0
   2   1  11   18.88    2.32   0
   2   2   5  218.65    2.86   0
   2   2   9  306.32    3.34   0
   3  -4  -2   64.63    2.95   0
   3   0   2 2056.83    7.83   0
   3   0  11    0.31    2.41   0
   3   1   4    5.20    2.07   0
   3   1   9    5.32    2.15   0
   4  -5  -2   24.87    2.13   0
   4  -2  12    1.66    2.33   0
   4  -1   2 1950.58    7.14   0
   4   0   4 1306.00    5.81   0
   4   0   8    2.65    1.63   0
   5  -5  -1  431.71    4.13   0
   5  -3   1  717.36    4.44   0
   5  -3  11   44.53    2.08   0
   5  -2  10   19.57    2.20   0
   5  -1   5    9.12    1.83   0
   5  -1   6    4.88    1.52   0
   5  -1   7   18.08    2.29   0
   6 -10  -3  232.84    3.41   0
   6  -4  10   46.57    2.04   0
   6  -3   3  186.97    2.62   0
   6  -3   8   26.59    1.92   0
   7 -16  -4   -0.03    2.17   0
   7  -5   3    2.03    2.02   0
   7  -5   8    3.41    1.74   0
   8 -17  -3   77.78    3.05   0
   8 -10   0   35.51    2.22   0
   8  -9   1    4.23    1.48   0
   8  -8   2   40.71    1.72   0
   8  -7   4    3.74    1.68   0
   8  -7   5   12.25    1.70   0
   8  -7   6   13.82    1.75   0
   8  -7   7   28.13    2.62   0
   9 -16  -1    2.58    1.83   0
   9 -14   0   65.27    2.16   0
   9 -12   1    6.86    2.43   0
   9 -11   2   37.58    2.48   0
   9 -10   4    7.12    2.49   0
   9 -10   5   13.96    1.91   0
   9 -10   6   -0.48    1.90   0
 -11 -10   1   49.48    2.14   0
 -11  -8   2   17.09    1.83   0
 -11  -4   6   69.29    2.72   0
 -11  -3   8   13.78    2.39   0
 -10 -12  -1   12.58    2.30   0
 -10  -9   0   47.04    1.89   0
 -10  -2   6    8.37    2.02   0
  -9 -12  -2   44.05    2.44   0
  -9  -9  -1  151.03    2.67   0
  -9  -7   0  235.25    2.91   0
  -9  -5   1  129.55    2.10   0
  -9  -1   5   69.04    1.97   0
  -9   0   8  320.53    3.88   0
  -9   0  10   44.40    3.23   0
  -8 -17  -4   -0.76    2.65   0
  -8 -12  -3   43.65    2.01   0
  -8  -9  -2    6.42    1.37   0
  -8  -7  -1  181.25    2.75   0
  -8  -5   0   49.26    2.15   0
  -8   1   7   63.56    2.58   0
  -7 -13  -4   -0.32    1.76   0
  -7  -7  -2  102.42    1.95   0
  -7  -5  -1    9.23    1.46   0
  -7  -2   1  125.50    2.03   0
  -7  -1   2   17.92    1.83   0
  -7   0   3    1.96    1.31   0
  -7   2  10    6.06    2.71   0
  -6 -15  -5   -5.44    2.13   0
  -6 -11  -4    4.98    2.05   0
  -6  -8  -3   10.31    2.10   0
  -6  -1   1    0.26    1.40   0
  -6   0   2    3.79    1.43   0
  -6   2   5   50.85    2.42   0
  -5 -19  -6    7.18    2.61   0
  -5 -18  -6  103.66    2.41   0
  -5  -9  -4    9.32    1.57   0
  -5   2  13    0.08    3.67   0
  -5   3   6  275.13    4.90   0
  -4 -15  -6   16.10    1.75   0
  -4 -11  -5  125.22    2.51   0
  -4  -8  -4    8.29    1.86   0
  -4  -2  -1  593.90    4.20   0
  -4   2   3    8.28    2.18   0
  -3 -14  -6  146.86    2.79   0
  -3 -10  -5   13.02    2.02   0
  -3  -7  -4 1003.73    5.05   0
  -3  -3  -2  506.99    3.92   0
  -2 -19  -7   32.89    2.69   0
  -2  -9  -5  346.74    3.30   0
  -2   0   0 3201.42   13.34   0
  -2   1   1 2632.06   14.25   0
  -1 -18  -7   12.67    2.48   0
  -1 -12  -6   20.36    1.61   0
  -1   1  14   24.29    2.77   0
  -1   3  11   49.40    2.53   0
   0 -17  -7   10.12    2.14   0
   0 -12  -6   15.93    2.20   0
   0   2  12    5.64    2.23   0
   0   3  10   50.41    2.43   0
   1   2   3   36.69    1.86   0
   1   2  11  142.84    3.10   0
   1   3   6  187.17    3.17   0
   1   3   7  292.68    3.16   0
   1   3   8   97.40    2.42   0
   2 -19  -7   28.90    3.08   0
   2   2   4  439.64    4.15   0
   3 -22  -7    1.78    2.99   0
   3 -14  -6   11.77    3.53   0
   4  -1  11    0.05    1.76   0
   4   0   9    6.51    1.52   0
   5  -8  -3  361.50    4.36   0
   5  -2   2   36.11    1.57   0
   5  -1   4    8.34    1.65   0
   5  -1   8   30.06    1.69   0
   6 -16  -5   28.84    3.38   0
   6  -8  -2  171.27    2.68   0
   6  -5   0   99.66    2.28   0
   6  -3   9   34.79    1.76   0
   6  -2   6   15.06    2.30   0
   7 -10  -2   38.89    2.37   0
   7  -7   0  313.37    3.26   0
   7  -6   1  148.82    2.72   0
   7  -5   9   -3.15    1.84   0
   7  -4   5   84.37    1.95   0
   7  -4   6    6.01    1.62   0
   7  -4   7   93.55    2.74   0
   8 -16  -3   13.05    2.60   0
   8 -13  -2  173.13    3.45   0
   8 -11  -1   69.69    2.46   0
   8  -7   3   46.36    1.80   0
   8  -7   8   27.54    2.16   0
   8  -6   5  185.92    2.81   0
   8  -6   6  173.15    2.81   0
   9 -18  -2    9.69    2.86   0
   9 -15  -1   59.03    2.95   0
   9 -13   0   23.89    2.61   0
   9 -10   3    9.19    1.90   0
   9  -9   4    6.95    2.09   0
   9  -9   5   -5.32    2.63   0
   9  -9   6   20.98    2.62   0
 -11 -11   1   53.54    2.48   0
 -11  -9   2    2.57    2.51   0
 -11  -7   3    4.07    1.93   0
 -11  -6   4    1.31    2.07   0
 -11  -5   5   10.46    2.22   0
 -10 -13  -1   12.23    2.67   0
 -10 -10   0   72.54    2.40   0
 -10  -8   1   33.68    2.52   0
 -10  -6   2   38.15    1.97   0
 -10  -5   3   51.23    2.51   0
 -10  -4   4  208.37    3.11   0
 -10  -3   5   98.08    2.64   0
 -10  -2   7  252.27    3.63   0
  -9 -13  -2   26.05    2.70   0
  -9  -4   2   81.77    1.98   0
  -9  -3   3   45.06    1.74   0
  -9  -2   4   16.15    1.63   0
  -9   0   9   -0.79    2.17   0
  -8 -13  -3   -2.08    2.08   0
  -8 -10  -2   22.10    2.24   0
  -8  -4   1   27.88    2.29   0
  -8   0   5   -0.28    1.85   0
  -8   1   8   21.98    2.29   0
  -8   1  10   -0.77    2.66   0
  -7 -14  -4  229.38    3.08   0
  -7 -10  -3    3.27    1.42   0
  -7   1   5   95.21    2.55   0
  -7   2   8   11.44    2.20   0
  -7   2   9    0.74    2.32   0
  -6 -16  -5  161.30    2.90   0
  -6  -6  -2  159.40    2.19   0
  -6  -4  -1   36.49    1.45   0
  -5 -13  -5   -4.35    1.63   0
  -5  -7  -3  124.32    2.44   0
  -5  -3  -1  735.20    4.30   0
  -5   2   4  390.58    4.57   0
  -4 -16  -6   77.92    2.13   0
  -3  -5  -3  526.32    3.92   0
  -3   3  12   65.94    3.14   0
  -3   4   8  169.49    5.25   0
  -2 -21  -7    0.48    2.76   0
  -2 -20  -7    3.26    1.89   0
  -2 -13  -6   -0.20    1.57   0
  -2   4   7   97.80    3.57   0
  -2   4   8   84.70    2.92   0
  -1 -19  -7   71.64    3.01   0
  -1  -9  -5  607.66    4.76   0
  -1   2  13   69.53    3.00   0
   0 -18  -7  106.13    2.90   0
   1 -18  -7    1.65    2.20   0
   1  -9  -5   13.79    1.99   0
   1   1  13   35.33    2.68   0
   1   3   5  259.02    3.55   0
   1   3   9  182.45    2.99   0
   2 -13  -6   39.43    2.85   0
   2   0  13   -0.06    1.84   0
   2   1   2 1767.97    8.33   0
   2   1  12   31.58    2.57   0
   2   2  10   14.01    2.10   0
   3  -1  13    9.09    1.99   0
   3   0  12   50.94    2.57   0
   3   1   3   42.24    2.28   0
   3   1  10  175.62    2.60   0
   4   0   3   -2.30    1.45   0
   4   0  10    7.93    1.75   0
   4   1   6   34.69    1.99   0
   4   1   7   -1.35    2.03   0
   5  -6  -2  624.26    5.11   0
   5  -2  11    0.15    1.87   0
   5  -1   3  136.73    2.41   0
   5  -1   9   32.61    1.87   0
   6 -12  -4   72.70    2.97   0
   6  -6  -1  475.49    3.94   0
   6  -4   1   39.40    1.58   0
   6  -3   2   75.75    2.32   0
   6  -3  10   13.41    1.91   0
   6  -2   4    4.15    1.91   0
   6  -2   5   49.15    1.73   0
   6  -2   7    2.52    1.51   0
   6  -2   8   27.47    2.36   0
   7 -15  -4   18.60    2.22   0
   7 -12  -3  106.53    2.74   0
   7  -8  -1    5.56    2.09   0
   7  -5   2   14.26    1.64   0
   7  -4   4    2.58    1.55   0
   7  -4   8    9.36    1.74   0
   8  -9   0  422.50    3.73   0
   8  -8   1   50.34    1.78   0
   8  -7   2   65.31    2.37   0
   8  -6   4  196.44    2.50   0
   8  -6   7   45.48    1.98   0
   8  -6   8    4.42    2.35   0
   9 -17  -2    4.48    2.53   0
   9 -14  -1   19.07    2.45   0
   9 -12   0   36.94    2.20   0
   9 -11   1  181.69    2.66   0
   9 -10   2    0.37    1.69   0
   9  -9   3   39.40    2.57   0
 -11  -8   3   48.35    2.69   0
 -11  -4   7   19.16    1.98   0
 -10 -14  -1  125.80    2.84   0
 -10 -11   0    9.06    2.48   0
 -10  -7   2   78.22    2.61   0
  -9 -14  -2  225.47    3.42   0
  -9 -10  -1    7.80    1.69   0
  -9  -8   0  325.17    3.20   0
  -9  -6   1  190.51    2.36   0
  -9  -1   6   -0.56    2.00   0
  -8 -14  -3   41.78    2.40   0
  -8  -8  -1   49.34    2.34   0
  -8  -6   0   20.23    2.09   0
  -8  -3   2  110.98    2.66   0
  -8  -1   4   15.84    2.24   0
  -8   1   9  106.94    3.30   0
  -7 -15  -4   10.82    1.85   0
  -7 -11  -3   27.13    1.92   0
  -7  -8  -2  102.92    2.03   0
  -7  -6  -1  152.14    2.57   0
  -7  -4   0  892.82    4.22   0
  -6 -18  -5    1.25    2.49   0
  -6 -17  -5   -1.07    1.87   0
  -6 -12  -4   60.65    1.83   0
  -6  -9  -3   31.32    2.24   0
  -6  -3   0   16.34    1.79   0
  -5 -14  -5   13.26    1.72   0
  -5 -10  -4    2.59    1.48   0
  -5  -5  -2   20.21    1.39   0
  -4 -18  -6   26.18    2.56   0
  -4 -17  -6    1.46    1.72   0
  -4 -12  -5  141.50    2.47   0
  -4  -6  -3  361.72    3.07   0
  -4  -4  -2   98.32    2.12   0
  -4  -1   0  343.44    3.38   0
  -4   3   5  287.78    5.41   0
  -3 -15  -6    0.99    1.58   0
  -3   4   9    4.63    2.80   0
  -2 -14  -6   37.81    2.29   0
  -2  -7  -4  133.73    2.79   0
  -2   3  12   98.18    3.06   0
  -2   4   9  158.19    3.60   0
  -1 -20  -7    9.53    2.45   0
  -1 -13  -6  112.79    2.71   0
  -1   4   7   37.35    2.32   0
  -1   4   8  131.15    3.01   0
   0 -19  -7    3.62    2.42   0
   0  -9  -5  305.36    4.04   0
   0   1   1  262.42    8.29   0
   0   1  14   -2.88    2.78   0
   0   3   4  990.91    7.52   0
   0   3  11  213.83    3.37   0
   1 -19  -7   13.09    2.47   0
   1   2  12    4.39    2.46   0
   1   3  10   38.61    2.34   0
   2 -20  -7    3.31    2.77   0
   2  -7  -4 1125.45   15.61   0
   3   2   6   36.09    1.55   0
   3   2   7  347.23    3.03   0
   3   2   8   77.72    2.05   0
   4  -1  12   37.93    2.07   0
   4   0  11   -0.09    2.08   0
   4   1   5    5.20    1.70   0
   4   1   8  213.07    2.63   0
   5 -13  -5    1.50    2.93   0
   5 -10  -4    0.78    1.74   0
   5  -1  10    3.47    1.67   0
   5   0   5    0.08    1.75   0
   5   0   6   63.21    1.88   0
   5   0   7   -1.64    1.62   0
   5   0   8    4.84    1.85   0
   6  -3  11    4.92    2.30   0
   6  -2   9   16.40    1.68   0
   7  -4   3  137.90    2.19   0
   7  -4   9   -1.40    1.87   0
   7  -3   5  125.03    2.60   0
   7  -3   6   22.74    2.02   0
   7  -3   7  343.47    3.39   0
   8 -15  -3   63.60    2.71   0
   8 -12  -2  222.83    3.38   0
   8 -10  -1    0.55    1.90   0
   8  -6   3   52.37    1.73   0
   8  -5   5   60.15    2.32   0
   8  -5   6   84.19    2.69   0
   8  -5   7  121.84    2.60   0
   9 -16  -2   20.60    2.41   0
   9 -10   1    9.49    1.98   0
   9  -9   2   66.59    2.41   0
   9  -8   4   51.21    2.56   0
   9  -8   5   28.77    2.01   0
   9  -8   6   27.35    2.00   0
  10 -14   1  111.45    3.22   0
  10 -13   2   39.87    2.14   0
  10 -12   3   14.60    2.65   0
 -11 -10   2    5.03    1.87   0
 -11  -7   4   28.74    2.09   0
 -11  -6   5   39.30    2.39   0
 -11  -5   6    8.42    1.98   0
 -11  -4   8   30.86    2.60   0
 -10 -12   0    5.82    2.61   0
 -10  -9   1   85.37    2.16   0
 -10  -6   3   53.19    2.54   0
 -10  -3   6    4.29    2.11   0
 -10  -2   8    5.30    1.86   0
 -10  -2   9    4.49    2.72   0
 -10  -2  10    0.29    2.73   0
  -9 -15  -2    1.71    2.61   0
  -9 -11  -1  177.01    2.52   0
  -9  -5   2   79.17    1.96   0
  -9  -2   5   15.51    2.20   0
  -8 -15  -3   51.69    2.12   0
  -8 -11  -2   30.35    1.99   0
  -8  -2   3  438.83    3.51   0
  -8   0   6    3.11    2.31   0
  -7 -17  -4    2.54    2.54   0
  -7 -16  -4   26.37    1.91   0
  -7 -12  -3    2.02    2.21   0
  -7  -3   1 1578.29    5.74   0
  -7   0   4  442.51    3.84   0
  -6 -19  -5    2.09    1.98   0
  -6 -13  -4  189.22    2.91   0
  -6  -7  -2  112.44    2.21   0
  -6   1   4   21.38    2.05   0
  -5 -15  -5   15.80    2.06   0
  -5  -2   0  111.67    2.22   0
  -4 -20  -6   76.78    2.88   0
  -4 -19  -6    8.77    2.30   0
  -4 -13  -5   -0.08    2.11   0
  -4  -9  -4   -1.28    1.41   0
  -4   0   1    0.52    1.32   0
  -4   1   2 1866.66    8.55   0
  -4   3  12   -0.60    3.06   0
  -3 -16  -6   23.96    2.22   0
  -3 -11  -5    1.90    1.57   0
  -3  -8  -4   40.88    1.97   0
  -3  -2  -1  129.65    2.72   0
  -2 -10  -5  500.86    3.79   0
  -2  -5  -3  106.07    2.67   0
  -2  -3  -2  900.04    5.69   0
  -1 -22  -7   12.90    2.37   0
  -1 -21  -7    0.91    1.79   0
  -1   0   0  608.46    8.51   0
  -1   3  12    4.53    2.11   0
  -1   4   9   86.58    2.81   0
   0 -20  -7   47.40    2.82   0
   0 -13  -6   54.31    2.49   0
   0   2  13   -1.81    2.44   0
   1 -20  -7   37.35    2.82   0
   1 -13  -6  333.63    4.55   0
   2 -21  -7   40.63    3.15   0
   2   2  11   -2.12    1.88   0
   2   3   6  441.46    3.79   0
   2   3   7   86.42    2.04   0
   2   3   8  977.87    5.35   0
   3   0  13   -4.07    2.29   0
   3   2   5  137.72    2.36   0
   3   2   9  545.33    3.80   0
   4  -2   0   26.31    1.54   0
   4  -1   1   90.31    2.13   0
   4   1   4 2278.04    7.33   0
   4   1   9    3.96    1.55   0
   5  -3   0   84.78    2.00   0
   5  -2   1   63.00    1.78   0
   5  -1  11   35.62    2.65   0
   5   0   4   -2.49    1.63   0
   5   0   9   -0.50    2.23   0
   6  -9  -3   65.37    2.40   0
   6  -7  -2  885.36    5.56   0
   6  -2   3   18.15    1.51   0
   6  -2  10   -2.56    2.62   0
   6  -1   5   98.45    2.46   0
   6  -1   6   50.04    1.90   0
   6  -1   7    7.51    2.06   0
   6  -1   8  145.08    2.74   0
   7 -20  -5    0.95    2.90   0
   7  -9  -2   11.49    2.21   0
   7  -6   0  338.37    3.07   0
   7  -5   1    5.64    1.46   0
   7  -4   2   41.17    2.24   0
   7  -4  10    2.07    1.84   0
   7  -3   4   22.67    1.51   0
   7  -3   8    1.54    1.57   0
   8 -19  -4   11.78    2.73   0
   8  -8   0   40.95    2.36   0
   8  -7   1  168.25    2.33   0
   8  -6   2   34.66    2.28   0
   8  -5   4    9.89    1.48   0
   8  -5   8  223.71    3.38   0
   9 -15  -2   47.87    2.55   0
   9 -13  -1    1.98    1.79   0
   9 -11   0    7.87    2.28   0
   9  -8   3  115.79    2.18   0
   9  -7   5   15.86    2.42   0
   9  -7   6  250.76    3.38   0
   9  -7   7    8.40    2.38   0
  10 -15   0   -2.11    2.73   0
  10 -13   1    1.78    2.41   0
  10 -12   2   15.23    2.74   0
  10 -11   3   18.18    2.81   0
  10 -11   4   -2.51    1.92   0
 -11 -11   2    3.39    1.93   0
 -11  -9   3   20.73    1.99   0
 -11  -5   7   -1.49    2.51   0
 -10 -13   0   69.33    2.69   0
 -10 -10   1   45.59    2.41   0
 -10  -8   2   50.69    2.52   0
 -10  -5   4   28.57    1.83   0
 -10  -4   5  103.23    2.23   0
  -9 -16  -2   17.40    1.91   0
  -9 -12  -1    6.44    2.06   0
  -9  -9   0   88.11    2.21   0
  -9  -7   1   88.36    1.94   0
  -9  -4   3   37.05    1.64   0
  -9  -3   4   43.41    1.73   0
  -9  -1   7   38.56    2.04   0
  -8 -17  -3   -5.25    2.70   0
  -8 -16  -3  134.59    2.53   0
  -8 -12  -2   -2.36    2.12   0
  -8  -9  -1    3.10    1.78   0
  -8  -7   0   87.07    2.45   0
  -8  -5   1   70.11    1.84   0
  -7 -18  -4   42.55    2.45   0
  -7  -9  -2   -1.07    1.49   0
  -7  -7  -1  146.73    2.68   0
  -7  -5   0   54.34    2.04   0
  -7  -2   2   46.69    1.66   0
  -7  -1   3  182.72    2.70   0
  -7   1   6    9.15    2.11   0
  -6 -14  -4   17.77    2.42   0
  -6 -10  -3  162.17    2.59   0
  -6  -5  -1   40.03    1.66   0
  -6  -2   1  857.64    4.75   0
  -6   2   6    4.49    1.92   0
  -5 -16  -5   -1.75    2.06   0
  -5 -11  -4   34.05    1.73   0
  -5  -8  -3   62.51    1.82   0
  -5  -4  -1   89.88    2.35   0
  -5  -1   1  177.30    2.89   0
  -5   1   3   43.08    2.46   0
  -5   3   7   84.60    3.65   0
  -4 -21  -6    0.01    1.91   0
  -3 -17  -6   42.80    2.17   0
  -3   2  14   14.05    2.89   0
  -3   4   7    5.50    3.75   0
  -2 -15  -6   19.98    2.05   0
  -2   2  14   10.58    2.85   0
  -2   4  10   43.93    2.58   0
  -1 -14  -6   39.49    2.50   0
  -1  -7  -4  299.55    3.90   0
  -1   1   1   48.34    5.21   0
  -1   4   6  575.29    6.11   0
  -1   4  10    2.56    2.25   0
   0 -22  -7   -0.88    2.68   0
   0 -21  -7   16.49    2.28   0
   0   3  12   -1.12    2.07   0
   0   4   7  120.09    2.79   0
   0   4   8    3.00    1.35   0
   0   4   9  153.70    3.06   0
   1 -22  -7   13.43    3.03   0
   1 -21  -7    1.13    2.42   0
   1   3  11   -0.76    2.38   0
   2 -22  -7    6.75    2.73   0
   2   1  13   34.88    2.22   0
   2   2   3 1144.25    6.26   0
   2   3   9   11.45    1.93   0
   3  -1   0  205.21    3.46   0
   3   0   1    1.29    1.96   0
   3   1  12   14.76    2.64   0
   3   2   4  351.74    3.62   0
   3   2  10   17.76    1.81   0
   4  -3  -1   65.30    2.18   0
   4   0   2  225.64    2.78   0
   4   0  12   62.54    2.90   0
   4   1  10  118.24    2.23   0
   5  -4  -1  338.86    3.50   0
   5  -1   2    4.54    1.32   0
   5   0  10    3.91    2.30   0
   6 -15  -5  137.89    4.08   0
   6  -4   0  142.07    2.65   0
   6  -3   1   23.55    1.47   0
   6  -2  11    4.77    2.32   0
   6  -1   4   44.98    2.12   0
   6  -1   9   10.16    2.37   0
   7 -19  -5   43.45    3.34   0
   7 -14  -4   42.51    2.67   0
   7 -11  -3   22.94    1.84   0
   7  -7  -1  519.88    4.09   0
   7  -3   3    7.53    2.02   0
   7  -3   9  219.43    2.97   0
   7  -2   6    4.91    1.75   0
   8 -18  -4   54.85    2.69   0
   8 -14  -3    8.28    1.65   0
   8 -11  -2    1.99    2.13   0
   8  -9  -1   35.91    2.17   0
   8  -4   5   -3.55    2.18   0
   8  -4   6   13.38    2.28   0
   8  -4   7   10.60    2.25   0
   9 -12  -1   -0.96    2.28   0
   9  -9   1  150.10    2.93   0
   9  -8   2  108.88    2.71   0
   9  -7   4   45.25    2.07   0
  10 -14   0    9.39    2.61   0
  10 -11   2    4.27    2.28   0
  10 -10   4   -2.67    1.93   0
 -11 -12   2    2.34    2.31   0
 -11 -10   3   11.93    2.51   0
 -11  -8   4   60.69    2.30   0
 -11  -7   5   -1.30    2.40   0
 -11  -6   6   53.88    2.63   0
 -11  -5   8   -1.61    2.66   0
 -10 -14   0    3.88    2.55   0
 -10 -11   1   -3.33    2.36   0
 -10  -7   3   51.36    2.47   0
 -10  -3   7    2.33    1.87   0
  -9 -13  -1   60.90    2.40   0
  -9 -10   0    4.74    2.28   0
  -9  -6   2   98.71    2.47   0
  -9  -2   6    8.75    2.17   0
  -9  -1   8   71.30    2.74   0
  -9  -1  11    5.42    2.97   0
  -8 -18  -3    9.29    2.02   0
  -8 -13  -2   21.64    2.33   0
  -8  -4   2  254.28    3.02   0
  -8  -1   5    1.17    2.15   0
  -8   0   7   -2.65    2.16   0
  -7 -19  -4    4.43    1.89   0
  -7 -13  -3   40.55    1.93   0
  -7 -10  -2   11.95    2.16   0
  -6  -1   2  170.16    2.50   0
  -6   0   3    0.94    1.42   0
  -5 -18  -5  114.62    2.91   0
  -5 -17  -5   14.33    1.80   0
  -5 -12  -4  211.56    3.02   0
  -5  -6  -2   48.00    1.54   0
  -5   0   2  214.00    2.97   0
  -4 -14  -5   89.58    2.04   0
  -4 -10  -4    0.84    1.40   0
  -4  -7  -3    0.94    1.27   0
  -4  -5  -2  211.32    2.92   0
  -4  -3  -1   23.66    1.55   0
  -4   2  14    3.70    3.21   0
  -3 -19  -6   30.10    2.57   0
  -3 -18  -6    2.36    1.76   0
  -3 -12  -5   26.73    1.71   0
  -3  -6  -3  127.24    2.29   0
  -3  -4  -2  934.10    5.25   0
  -3   4  10   26.30    2.94   0
  -2 -16  -6    4.72    2.26   0
  -2 -11  -5  109.60    2.47   0
  -2   4   6  735.91    9.47   0
  -1 -10  -5  176.16    2.69   0
  -1  -3  -2    3.19    2.21   0
  -1   2  14   -0.19    2.80   0
   0   4   6   27.43    2.27   0
   0   4  10    1.78    1.84   0
   1   2  13   54.56    2.82   0
   1   3   4  491.51    4.50   0
   2   2  12   32.67    2.06   0
   2   3   5   37.42    1.83   0
   2   3  10  181.43    3.08   0
   3   1   2  295.38    3.50   0
   3   2  11  198.29    3.04   0
   4 -16  -6   37.98    5.38   0
   4  -6  -3  101.51    3.40   0
   4   1  11    5.62    2.41   0
   4   2   6   31.64    2.03   0
   4   2   7    1.02    1.54   0
   4   2   8   58.47    2.55   0
   5   0   3   -0.89    1.71   0
   5   1   6   -0.26    2.05   0
   5   1   7   24.54    2.36   0
   5   1   8   31.66    2.16   0
   6 -11  -4   12.46    2.43   0
   6  -5  -1   92.15    2.43   0
   6  -2   2   43.21    1.58   0
   6  -1  10   55.70    2.88   0
   7  -3  10    0.41    1.91   0
   7  -2   5  141.85    2.21   0
   7  -2   7   30.00    1.93   0
   7  -2   8    3.25    1.66   0
   8 -17  -4    0.98    2.82   0
   8 -13  -3    2.42    2.19   0
   8  -6   1   17.78    2.28   0
   8  -5   2    6.28    1.96   0
   8  -4   4   13.59    1.99   0
   8  -4   8    0.29    1.87   0
   9 -18  -3    4.98    2.81   0
   9 -14  -2    1.45    2.51   0
   9 -10   0    0.65    1.73   0
   9  -7   3   26.33    1.89   0
   9  -6   4   42.93    2.27   0
   9  -6   5    8.96    1.67   0
   9  -6   6    0.82    1.93   0
   9  -6   7   -4.64    1.93   0
  10 -13   0   54.81    2.54   0
  10 -12   1   17.29    1.95   0
  10 -10   3  268.80    3.13   0
  10  -9   4    0.09    2.53   0
 -11 -11   3  134.94    3.19   0
 -11  -9   4   -1.84    2.56   0
 -11  -6   7    4.38    2.67   0
 -10 -15   0    8.14    2.38   0
 -10  -9   2   14.76    1.77   0
 -10  -6   4    4.27    2.06   0
 -10  -5   5   62.34    2.52   0
 -10  -4   6   87.27    2.16   0
 -10  -3   8    1.24    2.19   0
  -9 -14  -1   -1.50    2.31   0
  -9  -8   1    9.40    1.75   0
  -9  -5   3   -2.86    1.90   0
  -9  -3   5  178.95    2.90   0
  -9  -1   9   16.67    2.53   0
  -9  -1  10   65.12    3.03   0
  -8 -14  -2    7.23    2.43   0
  -8 -10  -1  156.46    2.20   0
  -8  -8   0   46.02    2.36   0
  -8  -6   1   -3.56    2.10   0
  -8  -3   3   15.72    1.62   0
  -8  -2   4   13.84    2.00   0
  -8   0  12    2.88    3.02   0
  -7 -14  -3   10.62    1.60   0
  -7  -8  -1   35.28    2.15   0
  -7  -4   1   18.04    1.55   0
  -6 -16  -4  218.76    3.22   0
  -6 -11  -3   71.01    1.95   0
  -6  -8  -2   28.25    1.61   0
  -6  -6  -1  387.92    3.34   0
  -6  -4   0  146.48    2.06   0
  -5 -20  -5   19.88    2.69   0
  -5 -19  -5    9.50    2.33   0
  -5 -13  -4   -3.06    2.12   0
  -5  -9  -3    0.93    1.49   0
  -4 -15  -5  122.17    2.52   0
  -3 -22  -6    2.36    2.71   0
  -3 -21  -6   29.12    2.77   0
  -3 -20  -6   20.01    2.46   0
  -3 -13  -5    8.31    2.16   0
  -3  -9  -4  439.76    3.41   0
  -3  -1   0  214.34    3.15   0
  -3   3  13   11.97    3.05   0
  -2 -17  -6   81.42    2.77   0
  -2  -8  -4   62.48    1.99   0
  -2   3  13   73.86    3.26   0
  -2   4  11  147.78    3.51   0
  -1 -15  -6   31.69    2.37   0
  -1  -5  -3  418.91    4.42   0
  -1   3  13   13.40    2.63   0
  -1   4  11   20.39    2.15   0
   0 -14  -6  236.95    3.49   0
   0 -10  -5  307.74    3.93   0
   0  -7  -4  120.70    3.10   0
   0   2   2    0.10    2.58   0
   0   2  14    9.96    2.81   0
   1   1   1    2.01    2.93   0
   1   3  12    7.06    2.40   0
   1   4   7    8.01    1.46   0
   1   4   8  556.07    4.15   0
   1   4   9    9.64    2.20   0
   2 -14  -6   10.85    2.40   0
   2 -10  -5  381.64    6.43   0
   2  -3  -2  177.21    5.73   0
   2   3  11  164.26    2.89   0
   3  -2  -1  427.15    5.04   0
   3   1  13   11.33    2.34   0
   3   3   6  235.00    2.97   0
   3   3   7   -0.31    1.37   0
   3   3   8  205.89    2.64   0
   3   3   9   11.00    2.02   0
   4   1   3   19.02    1.56   0
   4   2   5    8.01    1.87   0
   4   2   9   27.72    1.63   0
   5  -7  -3  957.50    6.81   0
   5  -5  -2  321.24    3.90   0
   5   0  11   -0.46    1.81   0
   5   1   5    8.41    1.45   0
   5   1   9   32.12    1.85   0
   6  -1   3    1.99    1.42   0
   6   0   5    2.42    1.99   0
   6   0   6  524.03    3.52   0
   6   0   7    0.31    1.44   0
   6   0   8   49.76    2.58   0
   7 -18  -5    9.94    3.10   0
   7 -13  -4   22.31    2.54   0
   7  -8  -2  316.17    3.71   0
   7  -5   0   52.00    1.72   0
   7  -4   1  289.49    2.80   0
   7  -3   2    9.45    1.51   0
   7  -2   4   -0.70    1.43   0
   7  -2   9   45.54    2.18   0
   8 -10  -2    5.71    1.88   0
   8  -7   0   73.07    2.08   0
   8  -4   3    9.08    2.08   0
   8  -3   6   26.98    2.38   0
   8  -3   7    2.43    2.32   0
   9 -17  -3   43.95    2.94   0
   9 -13  -2   19.13    2.35   0
   9 -11  -1  161.61    3.14   0
   9  -9   0   87.14    2.62   0
   9  -8   1  145.31    2.46   0
   9  -7   2   64.66    2.13   0
   9  -6   3   -2.06    2.11   0
   9  -5   6    6.28    2.29   0
  10 -15  -1    8.38    2.74   0
  10 -11   1    3.20    2.60   0
  10 -10   2   67.20    2.12   0
  10  -9   3  127.45    3.13   0
  10  -8   5   -2.98    2.72   0
 -11  -8   5   18.22    1.94   0
 -11  -7   6   22.78    2.28   0
 -10 -12   1   18.99    1.93   0
 -10 -10   2   -6.95    2.34   0
 -10  -8   3   33.16    2.12   0
 -10  -3   9   11.53    2.37   0
 -10  -3  10    2.97    2.64   0
  -9 -15  -1   71.99    2.19   0
  -9 -11   0   12.58    1.78   0
  -9  -9   1   70.63    2.59   0
  -9  -7   2   83.26    2.35   0
  -9  -4   4  236.54    2.65   0
  -9  -2   7   -0.65    2.45   0
  -8 -15  -2    6.33    2.07   0
  -8 -11  -1   12.71    1.65   0
  -8   0   8    5.34    2.16   0
  -7 -16  -3    3.91    2.24   0
  -7 -15  -3   -2.34    1.63   0
  -7 -11  -2    0.82    1.49   0
  -7  -6   0  360.31    2.97   0
  -7  -3   2   21.11    1.94   0
  -7   0   5    0.27    1.76   0
  -7   1   7   60.75    2.56   0
  -7   1  12   71.43    4.58   0
  -6 -18  -4   22.95    2.66   0
  -6 -17  -4   22.62    1.90   0
  -6 -12  -3  101.08    2.29   0
  -6   2   7  468.19    5.51   0
  -5 -21  -5    3.60    2.03   0
  -5  -7  -2  977.41    4.74   0
  -5  -3   0   82.57    1.95   0
  -5   2   5  364.21    4.57   0
  -4 -16  -5  161.74    3.06   0
  -4 -11  -4   80.58    2.04   0
  -4  -8  -3  134.98    2.42   0
  -4  -2   0   32.80    1.98   0
  -2 -18  -6    2.60    2.36   0
  -2 -12  -5  258.88    3.22   0
  -2  -2  -1  884.40    6.53   0
  -1 -16  -6   -1.42    2.13   0
   0   3  13   90.04    2.98   0
   0   4  11  131.26    3.15   0
   1 -14  -6   78.78    2.81   0
   1 -10  -5    0.61    2.15   0
   1  -7  -4   65.02    2.92   0
   1   0   0  594.99    8.94   0
   1   4   6  539.32    4.65   0
   1   4  10   44.80    2.37   0
   2   2  13   -4.07    2.73   0
   2   3   4   67.57    2.44   0
   3   2   3  314.98    3.55   0
   3   2  12    4.52    2.59   0
   3   3  10   92.84    2.59   0
   4  -4  -2  533.08    5.33   0
   4   1  12   48.29    2.77   0
   4   2  10   37.99    1.84   0
   5  -2   0  126.63    2.72   0
   5  -1   1   21.44    2.08   0
   5   1   4   16.34    2.03   0
   5   1  10    1.54    1.74   0
   6  -8  -3  179.81    3.20   0
   6  -6  -2  444.79    4.04   0
   6  -2   1    7.30    1.64   0
   6  -1  11   81.29    2.32   0
   6   0   4 1234.70    5.08   0
   6   0   9    4.17    1.83   0
   7 -10  -3   43.72    1.93   0
   7  -6  -1  134.60    2.61   0
   7  -2   3  417.72    3.25   0
   7  -2  10    0.62    1.94   0
   7  -1   5   50.05    2.29   0
   7  -1   6   -1.60    1.28   0
   7  -1   7  124.08    2.26   0
   7  -1   8   18.09    2.43   0
   8 -16  -4    6.38    2.46   0
   8  -8  -1  161.91    2.68   0
   8  -3   4  154.34    2.61   0
   8  -3   5   19.87    1.69   0
   8  -3   8    0.43    1.90   0
   8  -3   9    4.63    2.36   0
   9 -16  -3    7.40    2.57   0
   9  -5   4   55.52    2.41   0
   9  -5   5    0.39    1.67   0
   9  -5   7    1.88    1.97   0
  10 -14  -1   44.78    2.85   0
  10 -12   0    7.77    1.97   0
  10 -10   1  344.38    3.57   0
  10  -9   2    7.81    2.47   0
  10  -8   3    3.34    2.25   0
  10  -8   4   38.59    2.05   0
 -11 -12   3    6.36    1.99   0
 -11 -10   4    2.15    1.95   0
 -11  -9   5   11.30    2.74   0
 -11  -6   8    9.26    2.00   0
 -10 -13   1    1.97    1.86   0
 -10 -11   2    0.73    2.34   0
 -10  -7   4  104.62    2.20   0
 -10  -6   5  150.18    2.97   0
 -10  -5   6   49.69    2.76   0
 -10  -4   7  123.79    2.51   0
  -9 -17  -1    5.82    2.72   0
  -9 -16  -1    1.75    1.90   0
  -9 -12   0   41.95    1.86   0
  -9  -6   3   47.42    2.22   0
  -8 -17  -2   14.94    2.67   0
  -8 -16  -2   25.74    2.00   0
  -8 -12  -1  111.05    2.94   0
  -8  -9   0  403.39    3.38   0
  -8  -7   1   54.54    2.33   0
  -8  -5   2   34.91    1.73   0
  -8  -1   6    5.99    2.07   0
  -8   0   9    1.85    2.52   0
  -8   0  11    1.14    2.95   0
  -7 -17  -3   24.46    2.35   0
  -7 -12  -2  103.41    2.32   0
  -7  -9  -1   77.88    2.48   0
  -7  -2   3    7.51    1.41   0
  -7  -1   4    1.17    1.27   0
  -6 -20  -4   86.20    3.08   0
  -6 -19  -4    3.41    1.95   0
  -6 -13  -3    9.35    2.12   0
  -6  -9  -2    0.08    1.49   0
  -6  -3   1   20.02    1.59   0
  -6   1   5   54.00    2.23   0
  -5 -14  -4  115.38    2.12   0
  -5 -10  -3  116.74    2.06   0
  -5  -5  -1   50.12    1.67   0
  -5   3   8 1082.49   11.23   0
  -4 -17  -5   -1.45    1.72   0
  -3 -14  -5    0.49    1.72   0
  -3 -10  -4   89.74    2.38   0
  -3  -7  -3 1107.65    5.64   0
  -3   0   1    1.67    2.10   0
  -3   4  11   14.03    2.99   0
  -2 -20  -6   36.94    2.72   0
  -2 -19  -6    9.49    2.22   0
  -2  -6  -3  202.33    3.19   0
  -1 -11  -5    1.47    1.33   0
   0 -15  -6  115.44    2.86   0
   0   4   5  196.66    3.60   0
   1   2   2    5.99    1.79   0
   2   3  12    1.65    2.44   0
   2   4   7 1059.78    5.56   0
   2   4   8    5.84    1.70   0
   2   4   9  705.25    4.83   0
   3 -15  -6  169.02    4.91   0
   3   3   5  584.85    4.01   0
   4  -8  -4  285.31    5.95   0
   4  -1   0  325.82    3.60   0
   4   0   1    4.20    2.08   0
   4   2   4  193.12    2.52   0
   4   2  11   22.60    2.48   0
   5  -9  -4  382.98    5.37   0
   5   0   2    1.13    1.31   0
   5   1  11   35.96    2.57   0
   5   2   6  128.68    2.51   0
   5   2   7  425.16    3.66   0
   5   2   8    7.93    1.98   0
   6 -14  -5    1.78    2.81   0
   6  -3   0   16.69    1.46   0
   6  -1   2  226.31    2.49   0
   6   0  10   68.75    2.21   0
   6   1   7   10.76    1.86   0
   7 -17  -5   18.54    2.93   0
   7  -3   1  796.05    4.32   0
   7  -1   4   23.34    2.18   0
   7  -1   9   39.16    2.11   0
   8 -12  -3   10.22    2.20   0
   8  -6   0   19.07    2.09   0
   8  -5   1   26.98    1.67   0
   8  -4   2  559.83    3.70   0
   8  -3   3   58.41    2.14   0
   8  -2   6   78.98    2.54   0
   8  -2   7    4.58    2.21   0
   9 -15  -3   20.07    2.37   0
   9 -12  -2   31.57    2.38   0
   9 -10  -1   56.04    2.12   0
   9  -8   0  318.93    3.39   0
   9  -7   1   67.48    2.05   0
   9  -6   2  218.98    2.72   0
   9  -5   3   30.57    2.37   0
   9  -4   6    0.43    2.56   0
   9  -4   7    1.50    2.58   0
  10 -13  -1    2.38    2.32   0
  10 -11   0    6.44    2.45   0
  10  -7   4   -0.70    2.64   0
  10  -7   5   40.62    2.06   0
 -11 -11   4   12.67    2.07   0
 -11  -8   6    8.45    2.06   0
 -11  -7   7   10.15    2.03   0
 -10 -15   1    5.79    2.77   0
 -10 -14   1   41.41    2.23   0
 -10  -9   3    4.98    1.89   0
 -10  -4   8   45.62    2.54   0
  -9 -13   0   33.29    1.92   0
  -9 -10   1   54.82    2.09   0
  -9  -8   2  226.11    2.54   0
  -9  -5   4    1.53    1.96   0
  -9  -4   5  126.12    2.79   0
  -9  -3   6    6.13    1.83   0
  -9  -2   8   13.13    2.36   0
  -8 -18  -2   -3.09    1.99   0
  -8 -13  -1    1.73    2.45   0
  -8  -4   3   39.93    1.76   0
  -8  -3   4   89.55    2.56   0
  -8  -2   5  249.49    3.31   0
  -8   0  10   -0.14    2.45   0
  -7 -19  -3    5.22    2.44   0
  -7 -18  -3   63.56    2.20   0
  -7 -13  -2   29.89    2.40   0
  -7  -7   0  317.73    2.82   0
  -7  -5   1   64.55    1.81   0
  -7   1   8  123.14    3.16   0
  -6 -14  -3  105.20    2.60   0
  -6 -10  -2   32.10    2.20   0
  -6  -7  -1  182.72    2.28   0
  -6  -5   0   96.97    1.83   0
  -6  -2   2  187.69    2.86   0
  -6   0   4    6.65    1.95   0
  -5 -15  -4   13.06    1.78   0
  -5 -11  -3    3.48    2.06   0
  -5  -2   1   20.44    1.61   0
  -4 -20  -5   49.20    2.74   0
  -4 -19  -5   16.04    2.24   0
  -4 -18  -5    6.66    1.73   0
  -4 -12  -4    8.38    1.56   0
  -4  -6  -2    3.16    1.33   0
  -4  -4  -1   15.34    1.52   0
  -4  -1   1    0.19    1.88   0
  -4   2   4    0.68    2.09   0
  -3 -15  -5   11.42    2.12   0
  -3  -5  -2  523.32    4.22   0
  -3  -3  -1  914.71    5.60   0
  -3   1   2  435.40    5.28   0
  -2 -22  -6   29.73    2.56   0
  -2 -21  -6   69.23    2.81   0
  -2 -13  -5    3.22    1.95   0
  -2  -9  -4   96.32    2.55   0
  -2  -4  -2  180.26    2.88   0
  -2   4  12   20.15    2.78   0
  -1 -17  -6   11.95    1.72   0
  -1  -8  -4  258.02    3.30   0
  -1   4   5   80.76    3.46   0
  -1   4  12    5.97    2.32   0
   0 -16  -6   46.15    2.44   0
   0  -5  -3   14.54    2.06   0
   0  -3  -2  142.03    4.29   0
   0   4  12    4.11    2.19   0
   1 -15  -6   56.14    2.80   0
   1   3  13   11.14    1.85   0
   1   4   5  230.68    3.59   0
   1   4  11   49.93    2.18   0
   2   1   1 1202.86    7.65   0
   2   4   6   11.25    1.45   0
   2   4  10  101.22    2.59   0
   3   3  11   29.58    1.98   0
   4   1   2 1923.80    7.17   0
   4   3   6   53.78    2.15   0
   4   3   7  193.69    2.43   0
   4   3   8  250.77    2.74   0
   4   3   9  284.68    3.12   0
   5  -3  -1 1078.47    5.94   0
   5   1   3  127.23    2.36   0
   5   2   5  952.37    4.62   0
   5   2   9   48.62    2.01   0
   6  -4  -1    2.50    1.92   0
   6   0   3    0.31    1.83   0
   6   0  11   -0.29    1.91   0
   6   1   5  101.76    2.47   0
   6   1   6   52.02    1.80   0
   6   1   8  141.75    2.41   0
   6   1   9    9.37    2.40   0
   7 -12  -4   30.38    2.58   0
   7  -7  -2  347.52    3.65   0
   7  -4   0  843.32    4.47   0
   7  -2   2   39.19    1.64   0
   7  -1  10   11.47    1.91   0
   7   0   6   36.41    2.07   0
   7   0   7    3.13    2.38   0
   7   0   8   -2.55    2.09   0
   8 -15  -4   -1.63    2.40   0
   8  -9  -2  229.12    3.22   0
   8  -7  -1   48.71    2.35   0
   8  -2   5    7.52    1.62   0
   8  -2   8   -2.77    1.88   0
   8  -2   9    4.44    2.63   0
   9  -4   4    8.78    2.33   0
   9  -4   5    6.39    1.60   0
  10 -15  -2   28.94    2.51   0
  10  -9   1   55.67    2.70   0
  10  -8   2  201.00    2.74   0
  10  -7   3  105.70    2.80   0
  10  -6   5    3.19    2.60   0
 -11 -12   4    4.62    1.98   0
 -11 -10   5   98.27    2.47   0
 -11  -9   6   -6.57    2.70   0
 -11  -8   7    1.48    2.74   0
 -10 -12   2   30.74    2.02   0
 -10 -10   3   26.12    2.21   0
 -10  -8   4  141.64    2.38   0
 -10  -7   5   11.04    2.36   0
 -10  -6   6   51.55    2.64   0
 -10  -5   7   12.75    2.43   0
 -10  -4   9  102.59    2.84   0
  -9 -15   0   17.28    2.63   0
  -9 -14   0   71.05    2.06   0
  -9 -11   1  169.04    2.47   0
  -9  -7   3    1.81    2.10   0
  -9  -2   9    2.20    2.38   0
  -8 -14  -1   70.64    2.64   0
  -8 -10   0   27.17    1.61   0
  -8  -8   1  171.15    2.82   0
  -8  -6   2   10.83    2.04   0
  -8  -1   7   63.39    2.46   0
  -7 -14  -2  365.38    3.57   0
  -7 -10  -1    0.51    1.62   0
  -7  -4   2 1659.15    6.06   0
  -7   0   6  165.99    3.11   0
  -7   1   9   62.42    2.92   0
  -7   1  11   23.48    3.24   0
  -6 -15  -3   51.35    2.59   0
  -6  -1   3  184.81    2.63   0
  -6   2   8   62.34    3.11   0
  -5 -17  -4    4.74    2.38   0
  -5 -16  -4    4.52    1.74   0
  -5  -8  -2  324.57    2.97   0
  -5  -1   2    2.65    2.16   0
  -5   1   4    5.65    2.13   0
  -4 -22  -5    8.35    2.12   0
  -4 -21  -5    4.61    2.06   0
  -4 -13  -4   17.05    1.92   0
  -4  -9  -3   75.57    1.84   0
  -4   3  13   30.65    3.95   0
  -3 -16  -5   27.79    2.18   0
  -3 -11  -4   48.79    2.07   0
  -2   3  14    6.79    2.81   0
  -1 -19  -6   20.90    2.49   0
  -1 -18  -6   -2.18    1.86   0
  -1 -12  -5  206.75    3.00   0
  -1   3  14    2.14    2.76   0
   0 -11  -5  895.77    6.08   0
   0   3   3   -0.31    1.90   0
   1   3   3 1662.66    8.75   0
   1   4  12    5.06    2.21   0
   2 -15  -6   17.10    2.28   0
   2   0   0 2972.64   13.40   0
   2   2   2   15.98    1.56   0
   2   3  13   36.25    2.62   0
   2   4  11    4.30    1.99   0
   3  -5  -3  146.69    4.76   0
   3   3   4  379.13    3.44   0
   3   3  12    7.68    2.41   0
   3   4   7  129.66    2.54   0
   3   4   8   22.26    2.26   0
   3   4   9   58.20    2.41   0
   4  -2  -1    7.60    1.78   0
   4   2   3  323.29    3.39   0
   4   2  12    3.66    1.96   0
   4   3   5  147.15    2.48   0
   4   3  10   19.47    2.30   0
   5 -12  -5    4.59    2.72   0
   5   2  10   18.09    1.83   0
   6 -10  -4    0.50    1.98   0
   6   1  10   50.19    2.82   0
   7  -9  -3   86.24    2.71   0
   7  -5  -1   66.41    2.21   0
   7  -1   3   32.57    1.67   0
   7   0   5    3.42    1.51   0
   7   0   9    6.47    1.93   0
   8 -11  -3   34.93    2.32   0
   8  -5   0   51.91    2.09   0
   8  -4   1   90.73    2.50   0
   8  -3   2   27.62    2.58   0
   8  -2   4   67.45    1.80   0
   8  -1   7   38.23    2.32   0
   9 -14  -3   59.09    2.76   0
   9 -11  -2    6.04    2.28   0
   9  -9  -1   63.78    2.20   0
   9  -7   0  230.72    2.89   0
   9  -6   1   92.17    2.06   0
   9  -5   2   12.21    1.64   0
   9  -4   3  417.44    3.67   0
   9  -3   5  119.31    2.72   0
   9  -3   6   64.39    2.80   0
   9  -3   7  109.88    3.13   0
  10 -12  -1   24.34    2.08   0
  10 -10   0   54.97    2.16   0
  10  -7   2   -1.46    2.19   0
  10  -6   4   16.51    1.99   0
  10  -5   6   83.52    2.80   0
 -11 -11   5  102.67    2.55   0
 -10 -14   2   -2.58    2.65   0
 -10 -13   2   12.51    1.94   0
 -10 -11   3    3.35    2.26   0
 -10  -9   4   -6.46    2.36   0
 -10  -4  10   31.22    2.28   0
  -9 -16   0    1.97    2.19   0
  -9 -12   1    9.82    2.17   0
  -9  -9   2    1.91    1.73   0
  -9  -6   4    7.53    2.10   0
  -9  -3   7   78.68    2.67   0
  -9  -2  10    0.15    2.31   0
  -9  -2  11    2.41    2.32   0
  -8 -15  -1    3.48    2.02   0
  -8 -11   0  133.80    2.05   0
  -8  -5   3  113.10    2.51   0
  -7 -15  -2   21.40    2.15   0
  -7 -11  -1   49.38    2.35   0
  -7  -8   0  337.60    2.91   0
  -7  -6   1  136.47    2.56   0
  -7  -3   3  203.06    2.85   0
  -7   1  10  207.03    4.50   0
  -6 -16  -3  103.08    2.77   0
  -6 -11  -2   62.36    1.80   0
  -6  -8  -1   25.03    1.49   0
  -6  -4   1    1.51    1.66   0
  -6   2  11   77.92    4.66   0
  -5 -19  -4   21.34    2.50   0
  -5 -18  -4   55.43    2.35   0
  -5 -12  -3    9.41    1.57   0
  -5  -6  -1  217.69    2.53   0
  -5  -4   0   51.72    1.71   0
  -5   0   3   -0.37    1.97   0
  -4 -14  -4   15.01    2.16   0
  -4   0   2 3214.55   10.99   0
  -4   1   3    8.69    2.28   0
  -4   3   6    0.57    2.60   0
  -3 -17  -5   71.23    2.50   0
  -3  -8  -3    2.49    1.90   0
  -2 -14  -5   19.53    2.10   0
  -1 -23  -6   -1.22    2.84   0
  -1 -22  -6    5.55    2.66   0
  -1 -21  -6   -1.34    2.51   0
  -1 -20  -6    3.78    2.10   0
  -1   5   8    6.09    2.21   0
  -1   5   9   62.77    2.73   0
   0 -17  -6    5.56    2.10   0
   0   5   8  224.33    3.45   0
   0   5   9   79.68    2.66   0
   0   5  10   52.14    2.38   0
   1 -16  -6   19.14    2.23   0
   1   5   8  197.68    3.05   0
   1   5   9    0.77    1.93   0
   2   3   3  195.64    3.10   0
   2   4   5    5.39    1.53   0
   3  -3  -2 1137.61    9.01   0
   3   1   1  159.62    3.00   0
   3   4   6    4.94    1.41   0
   3   4  10   14.04    2.50   0
   4   3  11   36.93    2.60   0
   5   2   4    2.32    1.48   0
   5   2  11   -4.35    1.94   0
   5   3   7   76.61    2.41   0
   5   3   8   47.69    2.12   0
   6  -1   1   22.27    1.84   0
   6   0   2  682.93    4.10   0
   6   1   4   48.52    1.71   0
   6   1  11   90.31    3.06   0
   6   2   7   -1.30    2.12   0
   6   2   8   18.78    2.40   0
   7 -16  -5    3.83    2.98   0
   7   0   4    2.99    1.45   0
   7   0  10   26.53    2.10   0
   8 -14  -4   68.38    2.78   0
   8  -8  -2  491.16    4.22   0
   8  -2   3   50.99    1.86   0
   8  -1   5   70.19    2.12   0
   8  -1   6  101.86    2.15   0
   8  -1   8   77.97    2.43   0
   8  -1   9    6.64    2.68   0
   9  -3   4  127.66    2.79   0
  10 -14  -2    3.71    1.99   0
  10 -11  -1    1.54    2.38   0
  10  -9   0   47.33    2.34   0
  10  -8   1   18.59    1.86   0
  10  -6   3   37.73    1.97   0
  10  -5   4  107.60    2.62   0
  10  -5   5   67.67    2.35   0
  11 -11   1   -4.54    2.05   0
 -11 -10   6   10.06    2.08   0
 -11  -9   7    0.57    2.07   0
 -10 -15   2   34.64    2.43   0
 -10 -12   3   -2.80    2.58   0
 -10  -8   5   36.15    2.27   0
 -10  -7   6   51.53    2.65   0
 -10  -6   7   61.33    2.73   0
 -10  -5   8    3.40    1.90   0
  -9 -17   0   -5.04    1.92   0
  -9 -13   1   -3.56    2.09   0
  -9 -10   2   18.59    1.84   0
  -9  -8   3   -1.65    2.01   0
  -9  -5   5   -1.50    1.55   0
  -9  -4   6  240.25    3.01   0
  -9  -3   8   12.85    2.29   0
  -8 -17  -1   60.87    2.85   0
  -8 -16  -1  139.58    2.46   0
  -8 -12   0  101.85    2.59   0
  -8  -9   1   39.17    1.78   0
  -8  -7   2   11.82    2.11   0
  -8  -4   4   34.31    2.25   0
  -8  -3   5    3.02    2.12   0
  -8  -2   6   25.91    2.24   0
  -8  -1   8   23.00    2.22   0
  -7 -17  -2   -5.02    2.45   0
  -7 -16  -2   68.89    2.20   0
  -7  -2   4   26.32    1.81   0
  -7  -1   5   94.13    2.10   0
  -6 -18  -3    4.22    2.45   0
  -6 -17  -3   20.24    1.84   0
  -6 -12  -2   68.24    2.59   0
  -6  -6   0    8.06    1.41   0
  -6   1   6  144.70    3.03   0
  -6   2   9  159.18    4.26   0
  -5 -21  -4   -3.85    2.33   0
  -5 -20  -4   14.50    1.98   0
  -5 -13  -3    1.37    2.15   0
  -5  -9  -2   24.12    1.57   0
  -5   3   9  184.77    6.17   0
  -5   3  10  262.90    8.08   0
  -4 -15  -4   55.08    2.27   0
  -4 -10  -3  320.81    2.95   0
  -4  -7  -2   54.63    1.73   0
  -4  -3   0    3.41    2.07   0
  -3 -19  -5   12.80    2.42   0
  -3 -18  -5   -1.91    1.75   0
  -3 -12  -4  501.74    3.87   0
  -3   3  14   38.90    3.85   0
  -3   4  12   18.92    3.07   0
  -2 -15  -5  147.25    3.12   0
  -2 -10  -4   -0.91    1.35   0
  -2  -7  -3 2034.43    7.93   0
  -2  -1   0  895.06    7.09   0
  -1 -13  -5    8.25    2.06   0
  -1  -6  -3   98.52    2.59   0
  -1   4  13   10.87    2.67   0
  -1   5  10   66.76    2.76   0
   0 -18  -6   60.01    2.64   0
   0  -8  -4  768.11    6.18   0
   0   4  13   18.89    2.75   0
   0   5   7  312.08    3.99   0
   1 -11  -5   52.39    2.78   0
   1   5   7    1.18    2.02   0
   1   5  10  191.06    3.18   0
   2   4  12   29.57    2.76   0
   3   0   0  294.75    3.90   0
   3   2   2  187.18    2.73   0
   3   4  11   92.26    2.91   0
   4   3   4 2250.99    7.43   0
   4   4   7   76.58    2.38   0
   4   4   8   -5.30    2.19   0
   5  -6  -3  328.65    4.27   0
   5  -4  -2   -1.68    2.13   0
   5  -1   0   52.48    2.41   0
   5   0   1    1.68    1.39   0
   5   1   2    3.53    1.92   0
   5   3   6    1.98    1.46   0
   5   3   9  103.75    2.29   0
   6  -7  -3  409.82    4.33   0
   6  -5  -2  203.40    2.80   0
   6  -2   0    8.62    1.47   0
   6   1   3    2.02    1.93   0
   6   2   5   41.47    2.10   0
   6   2   6    8.76    1.75   0
   6   2   9   21.35    1.76   0
   6   2  10   -6.98    2.46   0
   7 -11  -4   10.94    2.44   0
   7  -6  -2   41.26    2.10   0
   7  -3   0   35.41    2.08   0
   7  -2   1  340.47    2.91   0
   7  -1   2   23.06    1.57   0
   7   1   6    3.17    1.39   0
   7   1   7  114.58    2.34   0
   7   1   9   38.44    2.72   0
   8 -10  -3    5.24    1.94   0
   8  -6  -1    1.57    1.62   0
   8  -1   4   81.70    1.88   0
   9 -13  -3   10.44    1.86   0
   9 -10  -2   18.72    2.42   0
   9  -8  -1   14.86    1.68   0
   9  -5   1  211.90    2.54   0
   9  -4   2   19.44    1.72   0
   9  -3   3   75.24    2.41   0
   9  -2   5   11.36    2.27   0
   9  -2   6    5.13    2.46   0
   9  -2   7    7.42    1.98   0
  10 -13  -2    9.98    2.67   0
  10  -7   1   -1.00    2.52   0
  10  -6   2  144.93    2.89   0
  10  -5   3  101.42    2.59   0
  10  -4   5   18.50    2.32   0
  10  -4   6   11.70    2.71   0
  11 -12   0    2.44    1.86   0
  11 -10   1   63.16    2.89   0
  11  -9   2   18.73    2.06   0
  11  -8   3    2.82    1.87   0
 -10 -13   3    1.62    2.60   0
 -10 -10   4   19.17    1.90   0
 -10  -5   9   -0.69    1.88   0
 -10  -5  10   -5.12    2.89   0
  -9 -14   1   21.20    2.22   0
  -9 -11   2   -1.90    2.26   0
  -9  -7   4   26.69    2.10   0
  -8 -19  -1   19.95    2.45   0
  -8 -18  -1   21.27    2.03   0
  -8 -13   0   45.05    2.53   0
  -8 -10   1    4.29    2.04   0
  -8  -1  12    0.12    2.97   0
  -7 -19  -2    0.33    2.58   0
  -7 -18  -2   90.62    2.27   0
  -7 -12  -1   10.70    1.59   0
  -7  -9   0    2.42    1.43   0
  -7  -7   1  550.24    3.75   0
  -7  -5   2   46.01    2.02   0
  -7   0   7   -0.18    2.04   0
  -6 -21  -3    0.73    2.64   0
  -6 -20  -3    0.12    2.26   0
  -6 -19  -3    1.06    1.77   0
  -6 -13  -2    9.81    2.23   0
  -6  -9  -1  119.81    2.15   0
  -6  -3   2   14.74    1.51   0
  -6   2  10    1.79    2.92   0
  -5 -14  -3   -2.79    2.16   0
  -5  -7  -1   19.93    1.83   0
  -5  -3   1 1116.36    5.75   0
  -5   2   6   11.55    2.23   0
  -4 -16  -4   -2.18    2.00   0
  -4  -5  -1  163.14    2.42   0
  -3 -23  -5   -5.53    2.39   0
  -3 -22  -5    6.42    2.31   0
  -3 -21  -5    2.47    1.91   0
  -3 -20  -5   -4.57    1.87   0
  -3  -6  -2    3.02    2.00   0
  -3  -2   0   24.47    1.59   0
  -2 -16  -5   22.44    2.14   0
  -2   4  13   19.61    2.83   0
  -1  -9  -4  107.31    2.36   0
  -1  -2  -1  738.59    7.41   0
  -1   5   7    0.69    2.10   0
  -1   5  11  147.61    3.45   0
   0 -20  -6   16.81    2.38   0
   0 -19  -6   -1.03    2.00   0
   0 -12  -5   -3.32    1.95   0
   0   5  11   12.50    2.43   0
   1 -17  -6   88.06    2.71   0
   1  -5  -3   14.68    2.57   0
   1   4   4  355.69    4.24   0
   1   4  13    4.27    2.47   0
   1   5  11   70.96    2.57   0
   2 -16  -6   26.56    2.32   0
   2   5   7  319.61    3.37   0
   2   5   8  122.22    2.34   0
   2   5   9   -1.32    1.65   0
   2   5  10    1.13    2.04   0
   3 -16  -6   12.04    2.65   0
   3   3   3 2635.29    8.76   0
   3   4   5  478.95    3.69   0
   4   3  12    5.87    1.94   0
   4   4   6  167.48    2.72   0
   4   4   9   35.39    1.91   0
   4   4  10    2.83    2.33   0
   5   2   3  519.78    3.73   0
   5   3   5  158.83    2.25   0
   5   3  10   22.26    2.06   0
   6 -13  -5   46.06    3.04   0
   6  -3  -1   21.37    2.09   0
   7 -15  -5  163.92    4.23   0
   7  -8  -3   42.78    2.45   0
   7  -4  -1   16.07    2.06   0
   7   0   3    4.12    1.56   0
   7   1   5   41.58    1.85   0
   7   1  10   10.92    2.69   0
   8 -13  -4   81.34    2.99   0
   8  -4   0  959.13    4.98   0
   8  -3   1  193.83    2.51   0
   8  -2   2   11.18    1.57   0
   8  -1   3   -5.07    2.18   0
   8   0   5   -3.14    2.13   0
   8   0   6  111.50    2.29   0
   8   0   7    4.87    1.83   0
   8   0   8    7.66    1.93   0
   8   0   9    0.26    2.69   0
   9 -17  -4    3.37    2.73   0
   9 -12  -3   13.35    2.17   0
   9  -6   0    5.01    1.62   0
   9  -2   4   17.90    2.44   0
  10 -12  -2   29.71    2.43   0
  10 -10  -1   43.96    2.12   0
  10  -8   0   66.48    2.69   0
  10  -4   4   11.99    2.72   0
  11 -11   0    0.59    2.71   0
  11  -8   2    1.15    2.70   0
  11  -7   3    1.51    2.37   0
 -10 -14   3   13.80    2.39   0
 -10 -11   4   25.97    1.87   0
 -10  -9   5    8.69    1.89   0
 -10  -8   6  112.16    2.86   0
 -10  -7   7   -4.15    2.51   0
 -10  -6   8   16.91    2.32   0
  -9 -16   1    6.25    2.56   0
  -9 -15   1   67.67    2.18   0
  -9 -12   2   26.23    2.36   0
  -9  -9   3    4.12    1.74   0
  -9  -6   5    3.65    2.00   0
  -9  -5   6    5.46    2.37   0
  -9  -4   7   56.79    2.13   0
  -9  -3   9    5.95    2.17   0
  -9  -3  10   -1.50    2.61   0
  -8 -14   0    4.59    2.11   0
  -8  -8   2  485.77    3.81   0
  -8  -6   3  140.20    2.24   0
  -8  -2   7  197.40    3.09   0
  -8  -1   9   97.68    2.97   0
  -8  -1  10   -0.23    2.87   0
  -8  -1  11   22.03    3.05   0
  -7 -20  -2    8.94    2.05   0
  -7 -13  -1    5.37    1.47   0
  -7 -10   0   68.03    2.35   0
  -6 -14  -2   12.49    2.06   0
  -6 -10  -1  696.47    4.27   0
  -6  -7   0  690.53    3.94   0
  -6  -5   1   95.59    2.20   0
  -6  -2   3 2731.23    8.47   0
  -6   0   5    0.95    1.99   0
  -5 -15  -3    0.52    2.05   0
  -5 -10  -2   23.98    1.57   0
  -5  -5   0   29.14    1.59   0
  -4 -17  -4   22.88    2.30   0
  -4 -11  -3  587.25    3.64   0
  -4  -8  -2  296.46    3.15   0
  -3 -13  -4  564.29    3.98   0
  -3  -9  -3    6.78    1.45   0
  -3  -4  -1 2082.60    7.97   0
  -2 -17  -5   31.72    2.26   0
  -2 -11  -4   84.42    2.45   0
  -2  -5  -2   13.58    1.94   0
  -2   5   9  174.97    3.92   0
  -2   5  10    0.65    2.65   0
  -1 -14  -5  332.65    3.77   0
  -1  -4  -2 4491.13   14.79   0
   0 -23  -6   23.17    2.60   0
   0 -22  -6    3.63    2.24   0
   0 -21  -6   33.94    2.09   0
   0   5   6  682.88    5.80   0
   1 -18  -6  160.02    3.65   0
   1   5   6  154.91    3.09   0
   2   4   4   45.66    1.92   0
   2   4  13   53.02    2.98   0
   2   5   6  778.53    4.93   0
   2   5  11   21.16    2.06   0
   3   4  12   12.25    1.99   0
   3   5   8    0.69    2.09   0
   3   5   9   11.89    2.17   0
   4 -17  -6   45.00    4.28   0
   4   0   0   10.91    1.83   0
   4   1   1   91.04    2.13   0
   4   2   2  180.34    2.54   0
   4   4  11    8.63    2.47   0
   5  -2  -1   19.47    1.78   0
   5   3  11   36.47    2.04   0
   6   2   4    6.90    1.47   0
   6   2  11    2.25    1.99   0
   6   3   7   34.04    2.17   0
   6   3   8   28.28    2.41   0
   6   3   9   26.07    2.25   0
   7   1   4   30.10    1.68   0
   7   2   7   26.94    2.50   0
   7   2   8    0.25    2.35   0
   8 -19  -5   11.09    3.56   0
   8  -7  -2   12.10    2.22   0
   8  -5  -1   62.32    2.28   0
   8   0   4    9.01    1.95   0
   9 -16  -4   57.81    2.97   0
   9  -9  -2    7.59    2.43   0
   9  -7  -1   73.40    2.02   0
   9  -4   1  938.80    4.77   0
   9  -3   2   17.72    2.07   0
   9  -1   6   14.20    2.52   0
   9  -1   7   42.78    2.07   0
  10 -15  -3   -0.90    2.39   0
  10  -9  -1   93.98    2.64   0
  10  -5   2   15.93    2.54   0
  10  -4   3    2.22    2.41   0
  10  -3   5    1.45    2.65   0
  10  -3   6   19.09    2.09   0
  11 -10   0   -1.45    2.30   0
  11  -9   1   14.87    1.96   0
 -10 -15   3   -1.16    1.94   0
 -10 -12   4   12.17    1.86   0
 -10 -10   5   18.96    2.12   0
 -10  -6   9   11.30    2.38   0
  -9 -18   1   39.80    2.87   0
  -9 -17   1   20.96    2.01   0
  -9 -13   2   26.19    2.51   0
  -9 -10   3   53.53    2.44   0
  -9  -8   4   16.96    2.10   0
  -9  -3  11   -2.55    2.41   0
  -8 -16   0   19.25    2.36   0
  -8 -15   0    0.97    1.79   0
  -8 -11   1   68.05    1.83   0
  -8  -5   4  247.90    2.74   0
  -8  -4   5  144.13    3.05   0
  -8  -3   6   -0.31    2.21   0
  -7 -15  -1   57.02    2.60   0
  -7 -14  -1   -0.48    1.79   0
  -7  -8   1   15.84    2.21   0
  -7  -4   3  265.54    2.64   0
  -7  -3   4   81.43    2.24   0
  -7  -1   6    7.40    2.09   0
  -7   0   8   21.21    2.68   0
  -7   0  13   -0.50    3.82   0
  -6 -15  -2   86.26    2.45   0
  -6  -1   4   19.85    1.51   0
  -5 -16  -3    6.71    2.29   0
  -5 -11  -2   33.29    2.27   0
  -5  -2   2   34.65    2.44   0
  -4 -21  -4   18.48    2.66   0
  -4 -20  -4   -0.82    2.37   0
  -4 -19  -4   85.36    2.57   0
  -4 -18  -4   13.65    1.75   0
  -4 -12  -3    0.74    1.99   0
  -4  -2   1    6.45    1.91   0
  -3 -14  -4   33.42    2.28   0
  -2 -18  -5  133.03    2.90   0
  -2  -3  -1  833.63    6.10   0
  -2   5   8  250.35    4.90   0
  -2   5  11   82.24    3.46   0
  -1   4  14    4.48    2.42   0
  -1   5  12   39.02    2.51   0
   0   4   4    8.08    2.01   0
   0   5  12   35.37    2.72   0
   1 -20  -6   64.67    3.18   0
   1 -19  -6   34.28    2.51   0
   1   5  12   64.95    2.94   0
   2 -17  -6   29.33    2.33   0
   2 -11  -5   93.03    3.38   0
   2  -1  -1 2321.45   13.97   0
   3  -1  -1   72.77    2.64   0
   3   4   4  286.02    3.37   0
   3   5   7  293.15    2.93   0
   3   5  10   -2.98    1.89   0
   4  -5  -3   18.31    2.30   0
   4  -3  -2 1182.47    7.48   0
   4   3   3  388.37    3.63   0
   4   4   5    4.19    1.46   0
   5  -8  -4  295.36    4.97   0
   5   3   4  121.10    2.21   0
   5   4   6   60.86    2.24   0
   5   4   7   38.44    1.80   0
   5   4   8   61.27    1.83   0
   5   4   9    9.23    1.74   0
   5   4  10   26.64    2.34   0
   6  -9  -4  159.24    3.38   0
   6  -1   0  331.68    3.37   0
   6   0   1    0.85    1.28   0
   6   1   2  224.07    2.82   0
   6   3   6   -3.11    1.51   0
   6   3  10    8.71    2.77   0
   7  -2   0   29.66    2.01   0
   7  -1   1   26.91    1.56   0
   7   0   2  143.84    2.19   0
   7   2   5  156.29    2.59   0
   7   2   6    3.26    1.38   0
   7   2   9   56.43    2.29   0
   7   2  10    0.29    2.45   0
   8 -18  -5   51.06    3.48   0
   8 -12  -4   24.47    2.75   0
   8  -9  -3   51.59    2.51   0
   8  -2   1   60.73    2.45   0
   8  -1   2   78.38    2.55   0
   8   1   6   98.75    2.75   0
   8   1   7   33.55    1.95   0
   8   1   8   86.47    2.38   0
   8   1   9   10.97    2.51   0
   9 -15  -4   27.50    3.06   0
   9 -11  -3   43.57    2.45   0
   9  -5   0  324.90    3.03   0
   9  -2   3   32.80    1.96   0
   9  -1   4   81.91    2.44   0
   9  -1   5   65.46    2.10   0
  10 -11  -2    7.17    2.50   0
  10  -7   0   27.81    1.91   0
  10  -3   4    7.91    2.35   0
  11 -12  -1   30.25    2.31   0
  11  -8   1    4.16    2.56   0
  11  -7   2   87.66    2.29   0
  11  -6   3   12.33    1.99   0
  11  -5   4   -3.14    2.27   0
 -10 -13   4    6.01    1.97   0
 -10 -11   5    1.10    2.57   0
 -10  -9   6    8.51    1.80   0
 -10  -8   7   25.99    2.44   0
 -10  -7   8    2.16    2.38   0
  -9 -14   2   -4.48    2.37   0
  -9 -11   3   60.20    2.54   0
  -9  -7   5   58.72    2.45   0
  -9  -6   6    0.41    2.52   0
  -9  -5   7   14.62    2.55   0
  -9  -4   8   56.06    2.13   0
  -8 -18   0    0.06    2.67   0
  -8 -12   1   41.86    1.91   0
  -8  -9   2  215.85    2.58   0
  -8  -7   3   52.18    1.97   0
  -8  -2   8   12.41    2.45   0
  -7 -16  -1    1.93    2.11   0
  -7 -11   0    6.24    1.68   0
  -7  -6   2   44.18    1.75   0
  -7  -2   5    0.65    1.36   0
  -6 -16  -2   38.80    2.35   0
  -6 -11  -1  615.91    3.75   0
  -6  -8   0  170.47    2.27   0
  -6  -4   2    0.26    1.83   0
  -6   1   7  246.62    3.96   0
  -5 -18  -3   -1.20    2.40   0
  -5 -17  -3  102.07    2.20   0
  -5  -8  -1   87.72    1.86   0
  -5   1   5  235.45    3.81   0
  -4  -6  -1   67.72    1.91   0
  -3 -15  -4   57.23    2.62   0
  -3 -10  -3  183.50    2.82   0
  -3   4  13   25.40    3.79   0
  -2 -23  -5    3.11    2.43   0
  -2 -22  -5    8.69    2.43   0
  -2 -21  -5   -1.59    2.28   0
  -2 -20  -5   22.39    2.35   0
  -2 -19  -5   34.31    1.95   0
  -2 -12  -4    2.18    1.89   0
  -2  -8  -3  944.91    5.37   0
  -1 -15  -5  119.11    2.36   0
  -1 -10  -4   79.64    2.53   0
   0 -13  -5    2.97    1.83   0
   1 -23  -6    0.81    2.36   0
   1 -22  -6   21.70    2.38   0
   1 -21  -6    0.96    2.25   0
   1 -12  -5   12.88    2.29   0
   1  -8  -4  841.82    7.83   0
   2 -18  -6   89.46    3.19   0
   2   5  12    0.75    2.68   0
   3 -17  -6   89.88    3.61   0
   3   5   6    2.66    1.38   0
   3   5  11    2.24    1.98   0
   4   4  12    8.53    2.06   0
   4   5   7   29.23    2.26   0
   4   5   8   65.54    1.99   0
   4   5   9    0.42    2.27   0
   5 -19  -6    0.57    4.20   0
   5   1   1   15.25    2.02   0
   5   2   2   39.68    2.07   0
   5   4  11   24.02    2.31   0
   6  -6  -3    1.21    1.91   0
   6  -4  -2    1.63    1.37   0
   6   2   3   18.94    1.54   0
   6   3   5   67.44    2.02   0
   7 -10  -4    1.84    2.28   0
   7  -7  -3   24.15    2.01   0
   7  -5  -2   49.99    1.81   0
   7   1   3   34.73    1.66   0
   8  -3   0  705.01    4.18   0
   8   0   3   -0.86    1.60   0
   8   1   5   75.91    2.12   0
   9  -8  -2  232.87    3.20   0
   9  -6  -1  183.24    2.99   0
   9  -3   1    4.07    1.99   0
   9  -2   2    9.57    1.80   0
   9   0   6   52.94    2.54   0
  10 -14  -3   13.98    2.64   0
  10  -8  -1   36.17    2.53   0
  10  -5   1   69.27    2.58   0
  10  -4   2   25.62    1.90   0
  10  -3   3   74.37    2.58   0
  10  -2   5   -1.34    2.56   0
  10  -2   6   -0.72    1.97   0
  11 -11  -1   40.55    2.89   0
  11  -6   2   56.10    2.78   0
 -10 -15   4    6.43    2.96   0
 -10 -14   4    8.68    2.07   0
 -10 -12   5    5.79    2.72   0
 -10 -10   6    2.43    2.60   0
 -10  -7   9    2.03    2.76   0
  -9 -16   2   22.87    2.66   0
  -9 -15   2   44.14    2.09   0
  -9 -12   3   13.31    2.51   0
  -9  -9   4   60.17    2.11   0
  -9  -4   9   -2.95    2.22   0
  -8 -19   0   53.05    2.25   0
  -8 -13   1   22.47    1.89   0
  -8 -10   2    6.46    2.11   0
  -8  -6   4   55.90    2.55   0
  -7 -19  -1    0.43    2.75   0
  -7 -18  -1   21.46    2.28   0
  -7 -17  -1   54.41    2.12   0
  -7 -12   0    7.53    1.64   0
  -7  -9   1   80.13    2.38   0
  -7  -5   3    4.82    1.89   0
  -7   0   9    1.47    2.40   0
  -6 -19  -2   11.59    2.50   0
  -6 -18  -2   -0.01    2.34   0
  -6 -17  -2   29.48    1.78   0
  -6 -12  -1  127.75    2.68   0
  -6  -6   1  453.49    3.29   0
  -5 -22  -3   34.63    2.63   0
  -5 -21  -3    4.87    2.36   0
  -5 -20  -3   28.63    2.02   0
  -5 -19  -3   33.49    2.01   0
  -5 -12  -2  321.23    2.96   0
  -5  -6   0    1.45    1.36   0
  -5  -4   1  320.07    3.16   0
  -5  -1   3   42.47    1.89   0
  -5   0   4   26.92    2.37   0
  -4 -13  -3    5.12    1.50   0
  -4  -9  -2   29.34    1.47   0
  -4  -4   0    0.51    1.42   0
  -3 -16  -4   70.57    2.48   0
  -3  -7  -2 1701.04    6.85   0
  -3  -1   1   72.32    2.19   0
  -2   0   1    0.76    1.87   0
  -2   4  14   -0.01    2.77   0
  -1 -16  -5    4.47    1.95   0
  -1  -7  -3  951.43    6.19   0
   0  -9  -4   15.68    2.14   0
   0   5  13    1.80    2.70   0
   1   5   5   -1.01    2.21   0
   1   5  13   68.35    3.01   0
   1   6   8   67.53    2.48   0
   1   6   9    3.42    2.49   0
   1   6  10   78.60    2.57   0
   2 -23  -6   10.64    3.04   0
   2 -20  -6   34.04    2.91   0
   2 -19  -6   12.00    2.32   0
   2   5   5  671.86    4.53   0
   2   6   9    8.67    2.04   0
   3 -18  -6   32.40    3.23   0
   3 -11  -5  533.67    9.05   0
   3   5  12    2.87    2.62   0
   4  -1  -1    1.98    1.42   0
   4   4   4  298.65    2.92   0
   4   5   6  480.50    3.76   0
   4   5  10  159.31    2.69   0
   4   5  11   24.13    2.44   0
   5  -3  -2   63.69    2.66   0
   5   0   0   17.82    1.63   0
   5   3   3  826.43    4.48   0
   5   4   5  395.13    3.14   0
   6  -2  -1  908.13    5.26   0
   6   3   4   64.06    2.23   0
   6   4   7   28.80    2.04   0
   6   4   8  125.25    2.35   0
   6   4   9    5.61    2.44   0
   7 -14  -5  132.28    3.83   0
   7  -3  -1 1505.40    6.07   0
   7   2   4   -1.53    1.46   0
   7   3   6   16.51    2.08   0
   7   3   7  334.02    3.04   0
   7   3   8   -3.07    1.63   0
   7   3   9  227.50    3.48   0
   8 -17  -5    1.21    2.66   0
   8  -6  -2   10.82    1.70   0
   8  -4  -1   35.27    2.25   0
   8   1   4   71.82    1.86   0
   8   2   7    2.98    2.28   0
   8   2   8   -2.66    2.71   0
   9 -14  -4   -0.17    2.44   0
   9 -10  -3   60.09    2.52   0
   9  -4   0   16.35    2.22   0
   9  -1   3  135.05    2.32   0
   9   0   5    0.16    1.79   0
  10 -13  -3    7.77    2.66   0
  10 -10  -2    2.00    1.78   0
  10  -6   0  132.06    2.39   0
  10  -2   4    4.08    1.78   0
  10  -1   6  100.62    2.73   0
  11 -10  -1   50.88    2.54   0
  11  -8   0    0.33    2.35   0
  11  -7   1    2.68    1.94   0
  11  -4   4    6.86    2.73   0
 -10 -13   5    0.68    2.73   0
 -10 -11   6   14.68    2.67   0
 -10  -9   7    0.39    2.00   0
 -10  -8   8   76.88    2.45   0
  -9 -18   2   15.11    2.76   0
  -9 -17   2    2.42    2.00   0
  -9 -13   3   20.38    2.42   0
  -9 -10   4   22.57    2.38   0
  -9  -8   5    3.73    1.76   0
  -9  -5   8   21.95    2.46   0
  -9  -4  10    5.84    2.42   0
  -9  -4  11    4.52    2.85   0
  -8 -15   1   45.56    2.59   0
  -8 -14   1   25.24    1.80   0
  -8 -11   2    3.61    2.09   0
  -8  -8   3   62.73    2.02   0
  -8  -5   5   83.53    2.55   0
  -8  -4   6    8.63    2.31   0
  -8  -3   7   54.55    2.27   0
  -8  -2   9   26.14    2.69   0
  -7 -21  -1    4.30    2.04   0
  -7 -20  -1   18.36    1.95   0
  -7 -13   0   57.52    1.86   0
  -7  -7   2  335.71    2.94   0
  -7  -1   7   55.79    2.53   0
  -7   0  12   28.66    3.36   0
  -6 -22  -2   -0.13    1.97   0
  -6 -21  -2    3.23    1.92   0
  -6 -20  -2   57.09    2.25   0
  -6 -13  -1   88.27    2.56   0
  -6  -9   0    7.83    1.38   0
  -6  -3   3   59.14    1.85   0
  -6   0   6   99.57    2.71   0
  -5 -13  -2  138.45    2.17   0
  -5  -9  -1   16.75    1.56   0
  -4 -14  -3    6.90    1.52   0
  -4  -1   2 1940.17    8.20   0
  -4   2   5   20.33    2.76   0
  -3 -18  -4   19.19    2.59   0
  -3 -17  -4  246.85    2.89   0
  -3 -11  -3   41.19    2.16   0
  -2 -13  -4   26.11    1.98   0
  -2   5  12    3.67    2.48   0
  -1 -18  -5   98.92    3.00   0
  -1 -17  -5   32.11    2.18   0
  -1   5   6  135.68    3.57   0
  -1   5  13   34.15    2.89   0
   0 -14  -5  103.82    2.67   0
   0  -6  -3  786.79    6.65   0
   0   6   8  267.18    3.74   0
   0   6   9   16.14    2.29   0
   0   6  10   79.17    2.72   0
   1  -3  -2  983.00   19.12   0
   1   6  11   15.25    2.22   0
   2 -22  -6   65.98    3.11   0
   2 -21  -6  126.38    3.59   0
   2   2   1  824.68    6.43   0
   2   3   2  834.36    5.76   0
   2   5  13   -0.38    2.76   0
   2   6   7   24.11    1.87   0
   2   6   8   69.47    2.12   0
   2   6  10   84.75    2.26   0
   3   2   1  126.74    2.72   0
   3   3   2  496.48    4.02   0
   3   5   5   63.80    1.86   0
   3   6   8  135.41    2.92   0
   3   6   9  349.30    3.60   0
   4 -18  -6    6.44    3.13   0
   5 -20  -6   21.02    4.72   0
   5  -5  -3   29.98    2.34   0
   5   4   4   40.48    2.08   0
   5   5   7   16.26    2.17   0
   5   5   8   34.75    1.85   0
   5   5   9   10.83    2.23   0
   5   5  10   20.73    2.25   0
   6 -12  -5    2.73    2.90   0
   6   4   6  269.64    2.76   0
   6   4  10   46.93    2.15   0
   7  -1   0   65.27    2.06   0
   7   0   1   -1.34    1.40   0
   7   1   2   23.89    1.54   0
   7   3  10    0.59    1.90   0
   8 -16  -5   30.43    3.19   0
   8 -11  -4   30.25    2.27   0
   8  -8  -3   59.91    2.12   0
   8  -1   1    5.52    1.55   0
   8   0   2 2227.40    6.61   0
   8   2   5    1.33    2.42   0
   8   2   6   64.29    2.05   0
   8   2   9   -2.30    1.98   0
   9  -7  -2   80.94    2.68   0
   9  -5  -1  127.61    2.53   0
   9   0   4   -0.59    1.70   0
   9   1   6   12.76    2.43   0
   9   1   7   45.97    2.07   0
  10  -9  -2   16.20    2.34   0
  10  -7  -1    9.40    2.32   0
  10  -4   1   30.17    2.44   0
  10  -3   2   51.06    2.09   0
  10  -2   3   24.66    2.45   0
  10  -1   5   10.89    1.90   0
  11 -12  -2    7.00    2.37   0
  11  -6   1   11.34    2.69   0
  11  -5   2   68.08    2.25   0
  11  -4   3  170.34    3.17   0
 -10 -14   5    3.60    2.00   0
 -10 -12   6   50.68    2.88   0
 -10 -10   7    2.73    2.25   0
 -10  -9   8   17.62    2.89   0
 -10  -8   9   22.20    2.45   0
  -9 -14   3   43.45    2.42   0
  -9 -11   4   -0.81    2.31   0
  -9  -9   5   11.68    2.48   0
  -9  -6   7   53.91    2.07   0
  -8 -16   1   12.60    2.27   0
  -8  -9   3   51.34    2.52   0
  -8  -7   4   12.25    2.38   0
  -8  -2  10    1.72    2.52   0
  -8  -2  11    9.12    2.78   0
  -8  -2  12    1.63    2.69   0
  -7 -14   0   67.28    2.04   0
  -7 -10   1   14.20    1.59   0
  -7  -4   4  295.67    2.95   0
  -7  -3   5    1.29    1.88   0
  -7  -2   6   14.91    2.16   0
  -7   0  10    8.57    2.33   0
  -7   0  11   -0.36    2.50   0
  -6 -14  -1   45.66    2.29   0
  -6 -10   0    2.31    2.03   0
  -6  -7   1 1100.51    5.15   0
  -6  -5   2  217.43    2.82   0
  -6  -2   4  239.15    3.20   0
  -6  -1   5   51.58    2.32   0
  -6   1   8  104.55    3.15   0
  -5 -14  -2    7.22    1.65   0
  -5   2   7  800.72    7.07   0
  -4 -16  -3   37.98    2.35   0
  -4 -15  -3  231.19    2.75   0
  -4 -10  -2    2.60    1.41   0
  -4  -7  -1  215.06    2.64   0
  -4   0   3    0.48    2.21   0
  -4   3  14    9.51    5.59   0
  -3 -23  -4    1.03    2.10   0
  -3 -22  -4   25.25    2.47   0
  -3 -21  -4   25.16    2.38   0
  -3 -20  -4   -5.36    2.27   0
  -3 -19  -4   39.95    2.00   0
  -3  -5  -1  250.52    2.95   0
  -3  -3   0  529.72    4.43   0
  -3   3   5  152.97    5.91   0
  -2 -14  -4   -1.78    2.16   0
  -2  -9  -3 2488.62    8.36   0
  -2  -6  -2  434.35    4.12   0
  -1 -24  -5    3.11    2.10   0
  -1 -23  -5   93.76    2.98   0
  -1 -22  -5   -2.23    2.52   0
  -1 -21  -5   -3.35    2.68   0
  -1 -20  -5    2.74    2.43   0
  -1 -19  -5  136.81    3.06   0
  -1 -11  -4   52.60    1.84   0
  -1   3   3   71.50    4.48   0
   0 -15  -5  274.87    3.72   0
   0   5   5  320.55    4.53   0
   0   6  11    2.21    2.48   0
   1 -13  -5   18.28    2.40   0
   1   6   7   19.96    1.65   0
   2   4   3   37.31    1.77   0
   2   6  11   81.59    2.34   0
   3 -23  -6    4.81    2.84   0
   3 -22  -6    7.55    2.84   0
   3 -21  -6    7.23    2.90   0
   3 -20  -6   24.22    2.92   0
   3 -19  -6   26.18    2.60   0
   3   4   3   30.94    1.70   0
   3   6   7  255.27    3.27   0
   3   6  10   12.84    1.89   0
   4 -19  -6   21.94    3.53   0
   4   2   1  587.06    4.45   0
   4   3   2  799.24    4.65   0
   4   5   5  100.75    1.99   0
   4   5  12  138.33    2.82   0
   5 -22  -6    0.41    3.96   0
   5 -21  -6  134.81    6.07   0
   5  -1  -1  167.35    2.61   0
   5   5   6    7.27    1.56   0
   5   5  11    0.91    2.39   0
   6  -8  -4   90.60    3.02   0
   6   0   0   73.89    2.34   0
   6   1   1   13.43    1.36   0
   6   2   2   39.87    1.55   0
   6   3   3  210.89    2.78   0
   6   4   5  238.17    2.59   0
   7  -9  -4   86.53    2.70   0
   7  -4  -2 1618.32    6.74   0
   7   2   3  400.88    3.15   0
   7   4   8   18.18    2.19   0
   8  -5  -2   37.08    2.21   0
   8  -2   0   48.06    1.79   0
   8   1   3   -0.95    1.58   0
   8   2   4   75.28    2.31   0
   9 -13  -4    8.72    2.43   0
   9  -3   0  302.70    3.20   0
   9  -2   1   46.47    1.72   0
   9  -1   2   13.47    1.52   0
   9   0   3   -3.87    2.32   0
   9   1   5   61.28    2.12   0
  10 -12  -3   -2.37    1.93   0
  10  -5   0    5.04    1.70   0
  10  -1   4  104.19    2.20   0
  10   0   6    1.76    2.34   0
  11  -9  -1   34.45    2.78   0
  11  -7   0   32.25    2.62   0
  11  -3   4   61.69    2.22   0
 -10 -13   6   15.93    2.74   0
 -10 -11   7    1.06    2.66   0
 -10  -9   9    2.46    2.88   0
  -9 -16   3   13.53    2.56   0
  -9 -15   3   16.00    1.93   0
  -9 -12   4    9.82    2.65   0
  -9  -8   6    1.09    2.26   0
  -9  -6   8   68.05    2.83   0
  -9  -5   9   43.50    2.18   0
  -8 -19   1    1.91    2.41   0
  -8 -17   1  157.22    2.44   0
  -8 -13   2  165.78    3.14   0
  -8 -12   2  204.02    2.53   0
  -8  -6   5  187.50    3.01   0
  -8  -3   8   62.85    2.49   0
  -7 -16   0   36.09    2.32   0
  -7 -15   0  317.45    3.15   0
  -7 -11   1   37.30    1.78   0
  -7  -8   2  312.15    2.90   0
  -7  -6   3  197.10    2.49   0
  -6 -15  -1   68.21    2.24   0
  -6   1  13   77.20    4.80   0
  -5 -16  -2   16.28    2.09   0
  -5 -15  -2   67.57    1.83   0
  -5 -10  -1  169.97    2.26   0
  -5  -7   0  752.98    4.21   0
  -5  -5   1  403.09    3.63   0
  -5  -3   2   61.64    1.96   0
  -4 -18  -3    1.79    2.39   0
  -4 -17  -3   89.90    2.07   0
  -4 -11  -2    9.61    2.00   0
  -4  -5   0   54.73    2.31   0
  -4  -3   1   70.01    2.54   0
  -4   1   4  598.43    5.86   0
  -3 -12  -3   10.98    1.47   0
  -3  -8  -2    4.55    1.39   0
  -3   0   2    4.64    1.92   0
  -2 -15  -4    0.77    2.17   0
  -2   5   7  159.84    4.89   0
  -1   6   9   33.83    2.46   0
  -1   6  10   27.10    2.45   0
   0   6   7   57.51    2.51   0
   0   6  12   22.46    2.35   0
   1   3   2    3.08    1.65   0
   1   4   3   43.60    2.27   0
   1   6  12   -1.54    2.52   0
   2 -12  -5  136.64    3.60   0
   2   6   6   85.83    2.43   0
   2   6  12   63.89    2.92   0
   3   1   0  205.06    3.19   0
   3   5   4   24.82    2.05   0
   3   6   6   28.86    1.91   0
   3   6  11  104.70    2.46   0
   4 -22  -6    6.81    3.11   0
   4 -21  -6   -0.77    3.38   0
   4 -20  -6    9.93    3.37   0
   4   1   0  329.01    3.62   0
   4   4   3    9.63    1.47   0
   4   6   7  145.79    2.82   0
   4   6   8  380.57    3.28   0
   4   6   9   95.75    2.34   0
   4   6  10  306.31    3.60   0
   5 -11  -5  129.77    5.56   0
   5   3   2   19.25    1.91   0
   5   5   5   16.42    2.06   0
   6  -3  -2   17.10    2.12   0
   6   4   4  239.14    2.84   0
   6   5   7   47.14    2.55   0
   6   5   8  140.81    2.39   0
   6   5   9  104.17    2.84   0
   6   5  10   55.35    2.54   0
   7 -13  -5    7.28    2.86   0
   7  -6  -3  191.07    3.08   0
   7  -2  -1  120.46    2.55   0
   7   3   4   22.58    1.71   0
   7   4   6    1.80    2.29   0
   7   4   7   83.87    2.23   0
   7   4   9    2.00    1.98   0
   7   4  10   -2.69    2.87   0
   8 -15  -5   91.45    3.66   0
   8  -7  -3   40.17    2.31   0
   8  -3  -1  224.39    3.12   0
   8   3   6   35.05    2.49   0
   8   3   7   -1.33    1.84   0
   8   3   8    6.22    1.96   0
   8   3   9    3.87    2.07   0
   9  -9  -3    6.44    1.77   0
   9   1   4   71.55    2.11   0
   9   2   6    5.94    2.18   0
   9   2   7    2.57    2.67   0
  10 -11  -3    7.81    2.59   0
  10  -8  -2   51.53    2.41   0
  10  -6  -1    6.68    2.40   0
  10  -3   1  106.66    2.75   0
  10  -2   2   11.87    1.84   0
  10  -1   3   47.98    2.61   0
  10   0   5    0.22    1.92   0
  11 -11  -2    6.57    2.78   0
  11  -5   1   70.86    2.26   0
  11  -4   2   11.79    2.14   0
  11  -3   3   62.39    2.46   0
  11  -2   4    4.95    2.42   0
 -10 -12   7   -0.20    2.66   0
 -10 -10   8    4.72    2.00   0
  -9 -18   3   11.09    2.46   0
  -9 -17   3   49.12    2.28   0
  -9 -13   4   13.03    2.18   0
  -9 -10   5  116.96    2.33   0
  -9  -7   7   12.17    1.82   0
  -9  -5  10   24.70    2.19   0
  -9  -5  11   37.34    2.91   0
  -8 -14   2    1.41    2.40   0
  -8 -10   3   12.26    1.47   0
  -8  -8   4  145.57    2.43   0
  -8  -5   6   46.54    1.86   0
  -8  -4   7  124.27    2.45   0
  -7 -21   0   10.08    2.83   0
  -7 -20   0   14.43    2.68   0
  -7 -19   0   71.50    2.53   0
  -7 -18   0   57.85    2.16   0
  -7 -17   0   34.14    1.98   0
  -7 -12   1  113.47    2.47   0
  -7  -9   2   15.04    2.26   0
  -7  -5   4   -1.32    1.96   0
  -7  -1   8  117.67    2.85   0
  -6 -18  -1   10.37    2.46   0
  -6 -17  -1   84.67    2.59   0
  -6 -16  -1    2.18    1.82   0
  -6 -11   0   -0.77    1.53   0
  -6  -8   1    5.55    1.87   0
  -6  -4   3   23.45    2.05   0
  -5 -23  -2   17.90    2.79   0
  -5 -18  -2   10.32    2.33   0
  -5 -17  -2   11.13    1.81   0
  -5 -11  -1    8.81    1.76   0
  -4 -23  -3    1.97    1.99   0
  -4 -22  -3    5.02    2.00   0
  -4 -21  -3   12.78    1.88   0
  -4 -20  -3   37.43    2.01   0
  -4 -19  -3   -1.06    1.76   0
  -4  -8  -1    9.36    1.90   0
  -3 -13  -3   18.68    2.15   0
  -2 -16  -4    4.09    2.28   0
  -2 -10  -3   73.17    2.49   0
  -2  -4  -1  335.57    3.97   0
  -2  -2   0  671.60    6.13   0
  -2   5  13    0.66    2.90   0
  -1 -12  -4    7.15    1.93   0
  -1  -8  -3  177.11    3.26   0
  -1  -5  -2  648.43    5.60   0
  -1   6  11   -0.83    2.51   0
   0 -17  -5   21.47    2.26   0
   0 -16  -5   -2.37    1.66   0
   0 -10  -4   28.18    2.23   0
   1   2   1  670.83    7.50   0
   1   6   6   83.47    2.58   0
   2   1   0  850.47    7.24   0
   2   5   4 1266.51    6.33   0
   3   6  12    3.61    2.67   0
   4  -7  -4  259.09    6.08   0
   4   5   4  311.48    3.22   0
   4   6   6  157.66    2.69   0
   4   6  11   42.74    2.06   0
   5   2   1   59.15    1.81   0
   5   4   3  616.83    4.00   0
   5   6   8    7.05    2.32   0
   6  -5  -3  217.55    3.17   0
   6  -1  -1    0.30    2.04   0
   6   5   6   13.84    1.72   0
   7   1   1   28.08    1.99   0
   7   4   5   90.24    2.44   0
   8 -10  -4    2.72    2.09   0
   8  -1   0  838.60    4.72   0
   8   0   1    1.49    1.55   0
   8   1   2   74.38    2.05   0
   8   3   5   17.67    1.75   0
   9 -12  -4   19.76    2.52   0
   9  -6  -2   82.30    2.16   0
   9  -4  -1  175.80    2.55   0
   9  -1   1   75.84    2.45   0
   9   0   2    2.68    2.08   0
   9   1   3  136.72    2.66   0
   9   2   5   11.44    2.65   0
  10 -15  -4   17.12    2.56   0
  10  -4   0    0.76    1.77   0
  10   0   4   21.63    1.90   0
  10   1   6  118.98    2.87   0
  11 -10  -2   -3.58    2.26   0
  11  -8  -1   13.43    2.03   0
  11  -6   0   85.29    2.39   0
  11  -3   2   71.19    2.77   0
 -10 -11   8    4.12    2.03   0
  -9 -15   4   23.44    2.86   0
  -9 -14   4    3.71    1.79   0
  -9 -11   5    1.50    1.75   0
  -9  -9   6   20.13    1.81   0
  -9  -8   7   17.82    2.49   0
  -9  -7   8    2.97    2.39   0
  -9  -6   9   38.81    2.45   0
  -8 -16   2    1.23    2.47   0
  -8 -15   2   10.17    1.80   0
  -8 -11   3   47.36    1.75   0
  -8  -9   4   11.07    1.97   0
  -8  -7   5  134.49    2.78   0
  -8  -3   9  198.79    2.98   0
  -7 -13   1   66.23    2.12   0
  -7  -7   3   21.50    1.70   0
  -7  -4   5   27.26    2.20   0
  -7  -2   7    0.62    2.13   0
  -6 -22  -1    0.38    2.06   0
  -6 -21  -1    8.08    1.94   0
  -6 -20  -1   42.06    2.12   0
  -6 -19  -1   45.89    1.96   0
  -6 -12   0   -3.74    1.92   0
  -6  -6   2  442.88    3.31   0
  -6   0   7    0.32    2.14   0
  -6   1   9   68.77    2.90   0
  -5 -22  -2    1.04    2.02   0
  -5 -21  -2   32.47    2.06   0
  -5 -20  -2    1.19    1.77   0
  -5 -19  -2   38.76    1.95   0
  -5 -12  -1    2.55    1.90   0
  -5  -8   0   12.29    1.33   0
  -5  -2   3    9.98    1.61   0
  -5   1   6  287.62    4.34   0
  -4 -12  -2   28.35    1.58   0
  -4   3   7 1111.43   11.23   0
  -3 -14  -3   54.00    2.39   0
  -3  -9  -2  297.28    3.41   0
  -3  -6  -1    1.53    2.03   0
  -3   4  14   14.68    4.02   0
  -2 -24  -4    6.58    2.52   0
  -2 -23  -4   -4.44    2.62   0
  -2 -18  -4    3.31    2.04   0
  -2 -17  -4   92.61    2.44   0
  -2   1   2  103.99    3.99   0
  -1   4   4  863.25    9.86   0
  -1   6   8   34.94    2.38   0
  -1   6  12   -0.16    2.77   0
   0 -24  -5    1.94    2.60   0
   0 -23  -5   -3.57    2.61   0
   0 -22  -5   -2.53    2.63   0
   0 -19  -5   69.88    2.81   0
   0 -18  -5   72.85    2.59   0
   0   6  13   -0.70    2.31   0
   1 -14  -5   98.82    2.89   0
   1  -1  -1   39.75    4.99   0
   1   5   4   69.37    2.74   0
   1   6  13   17.06    2.78   0
   2   6  13   55.47    3.15   0
   2   7   9    0.15    2.19   0
   2   7  10  135.98    3.03   0
   3   7   9   17.52    1.94   0
   4  -2  -2   21.57    2.23   0
   4   6  12    3.04    2.88   0
   5  -7  -4    0.42    2.27   0
   5   1   0   52.14    1.88   0
   5   5   4  184.94    2.80   0
   5   6   7   11.76    1.70   0
   5   6  10    7.00    1.90   0
   5   6  11   14.20    2.46   0
   6   2   1    6.91    1.80   0
   6   3   2   73.52    2.33   0
   6   5   5   -0.33    2.16   0
   7   0   0  804.35    4.29   0
   7   3   3   11.00    1.48   0
   7   5   7   10.86    2.44   0
   7   5   8    4.89    2.49   0
   7   5   9   -4.84    2.63   0
   8  -4  -2  241.97    3.26   0
   8   3   4  159.97    2.62   0
   8   4   7    9.99    2.43   0
   9  -8  -3   -0.77    1.77   0
   9  -2   0   84.85    2.07   0
   9   3   7  122.82    3.14   0
  10 -14  -4    5.88    2.39   0
  10 -10  -3   24.08    2.69   0
  10  -7  -2   66.48    2.67   0
  10  -5  -1   -1.67    2.43   0
  10  -2   1   24.71    2.53   0
  10  -1   2   14.85    1.86   0
  10   0   3   -2.27    2.47   0
  10   1   5   -3.06    1.95   0
  11  -7  -1   26.51    2.69   0
  11  -5   0   74.37    2.53   0
  11  -4   1   76.53    2.30   0
  11  -2   3    2.63    1.88   0
  11  -1   4   25.51    2.72   0
  -9 -17   4    1.97    2.64   0
  -9 -16   4   51.02    2.13   0
  -9 -12   5    8.03    1.79   0
  -9 -10   6    6.12    2.16   0
  -9  -6  10    3.26    2.29   0
  -9  -6  11    2.23    2.97   0
  -8 -20   2    5.17    2.78   0
  -8 -19   2   14.14    2.67   0
  -8 -18   2   34.33    2.58   0
  -8 -17   2    1.08    1.84   0
  -8 -12   3    4.88    1.77   0
  -8  -6   6  340.91    3.51   0
  -8  -5   7   17.16    2.29   0
  -8  -4   8    9.10    2.25   0
  -8  -3  10    4.20    2.24   0
  -8  -3  11  122.51    3.44   0
  -8  -3  12   -0.03    2.79   0
  -7 -15   1   74.04    2.73   0
  -7 -14   1    1.93    1.40   0
  -7 -10   2   43.17    1.71   0
  -7  -3   6   44.27    1.90   0
  -7  -1   9   58.84    2.41   0
  -7  -1  13   20.52    3.48   0
  -6 -13   0    3.42    2.04   0
  -6  -9   1  586.52    3.60   0
  -6  -3   4    1.87    1.40   0
  -6   1  12    2.68    3.35   0
  -5 -13  -1   11.58    2.21   0
  -5  -6   1  236.35    3.08   0
  -5  -4   2   -0.32    1.99   0
  -5  -1   4    5.26    2.27   0
  -4 -13  -2   16.88    1.52   0
  -4  -9  -1  489.42    3.83   0
  -4  -6   0  315.29    3.37   0
  -4  -2   2   19.47    2.31   0
  -3 -15  -3   56.39    2.37   0
  -3   1   3   87.46    3.00   0
  -3   2   4  340.96    6.19   0
  -3   5  10   93.69    5.33   0
  -2 -22  -4   -0.19    1.89   0
  -2 -21  -4  237.33    3.14   0
  -2 -20  -4   19.22    2.19   0
  -2 -19  -4    5.03    1.86   0
  -2 -11  -3 1692.39    6.80   0
  -2  -7  -2 1851.28    7.76   0
  -1 -13  -4  649.77    4.43   0
   0 -21  -5   12.70    1.86   0
   0 -20  -5    8.19    2.13   0
   0  -4  -2 2742.72   14.68   0
   1 -15  -5    0.67    2.42   0
   1  -9  -4  285.03    4.41   0
   1   7   8  382.18    4.04   0
   1   7   9  209.13    3.44   0
   1   7  10    1.99    2.17   0
   1   7  11    1.39    2.13   0
   2  -8  -4  285.51    6.26   0
   2   6   5   62.37    2.50   0
   2   7   8  290.89    3.22   0
   2   7  11   79.78    2.90   0
   3  -2  -2   15.07    2.06   0
   3   6   5    3.80    1.37   0
   3   7   8   28.02    1.86   0
   3   7  10    1.68    1.75   0
   3   7  11    5.73    2.27   0
   4  -4  -3  596.59    6.60   0
   4   0  -1   -2.39    1.80   0
   4   6   5  293.13    3.15   0
   4   7   8   39.92    2.17   0
   4   7   9  158.22    3.13   0
   5  -2  -2   33.19    1.92   0
   5   6   6  185.91    2.46   0
   6   1   0  319.40    3.31   0
   6   4   3   96.61    1.94   0
   6   6   7  250.18    3.15   0
   6   6   8   82.75    2.14   0
   6   6   9   33.82    2.00   0
   6   6  10   -3.15    2.39   0
   7 -12  -5   -0.84    2.49   0
   7  -8  -4   10.05    2.33   0
   7  -5  -3    1.17    1.77   0
   7  -3  -2   16.86    1.53   0
   7  -1  -1   31.35    2.09   0
   7   4   4    1.73    1.66   0
   7   5   6   18.58    1.72   0
   8 -14  -5   11.56    2.62   0
   8  -9  -4    4.27    1.97   0
   8  -6  -3  138.67    2.94   0
   8  -2  -1  117.15    2.33   0
   8   1   1    6.11    2.06   0
   8   2   2   10.34    1.95   0
   8   4   5    6.19    2.11   0
   8   4   6    7.17    1.74   0
   9 -17  -5   16.30    3.36   0
   9 -11  -4    3.88    2.21   0
   9  -5  -2   80.62    2.56   0
   9  -3  -1    9.26    2.16   0
   9   1   2   15.71    1.93   0
   9   3   5  125.49    2.70   0
   9   3   6   58.52    2.20   0
  10  -3   0  123.57    2.43   0
  10   1   4   89.68    2.30   0
  10   2   6    4.12    2.38   0
  11 -12  -3   10.09    2.52   0
  11  -9  -2    1.62    2.03   0
  11  -3   1    9.35    2.28   0
  11  -2   2    3.14    2.65   0
  11  -1   3   30.15    2.39   0
  -9 -14   5   38.60    2.78   0
  -9 -13   5    1.55    1.80   0
  -9 -11   6   19.04    2.21   0
  -9  -9   7   -3.67    1.96   0
  -9  -8   8    0.00    2.44   0
  -9  -7   9    0.86    1.95   0
  -8 -14   3   12.02    2.42   0
  -8 -13   3    3.10    1.74   0
  -8 -10   4    0.09    1.55   0
  -8  -8   5    6.00    1.99   0
  -7 -17   1   92.98    2.87   0
  -7 -16   1  148.04    2.51   0
  -7 -11   2    2.28    1.62   0
  -7  -8   3   41.68    1.83   0
  -7  -6   4  169.29    2.50   0
  -7  -1  10  203.97    3.90   0
  -7  -1  12   74.22    3.68   0
  -6 -14   0   10.76    1.73   0
  -6 -10   1  128.56    2.57   0
  -6  -7   2  844.23    4.48   0
  -6  -5   3  227.89    3.00   0
  -6  -2   5   45.67    1.82   0
  -6  -1   6  139.11    2.79   0
  -6   1  10    0.01    2.46   0
  -6   1  11  127.97    4.24   0
  -5 -14  -1   75.24    2.50   0
  -5  -9   0  213.09    2.48   0
  -5   0   5    0.01    1.44   0
  -5   2   8    9.04    2.80   0
  -4 -14  -2   10.10    1.64   0
  -4  -4   1   66.68    2.49   0
  -3 -24  -3   13.78    2.61   0
  -3 -23  -3   60.58    2.84   0
  -3 -17  -3   46.19    2.44   0
  -3 -16  -3   78.84    2.22   0
  -3 -10  -2  134.06    2.66   0
  -3  -4   0  372.73    3.69   0
  -3  -2   1  469.60    4.51   0
  -3   5  11   25.98    4.28   0
  -2   4   5   69.74    6.69   0
  -1 -14  -4   29.79    2.24   0
  -1  -3  -1 4758.14   17.00   0
  -1  -1   0 1578.69   12.33   0
   0 -11  -4   -1.74    1.88   0
   0  -7  -3   66.27    2.84   0
   0   6   6    1.85    2.10   0
   0   7  10   27.12    2.25   0
   2 -13  -5   71.87    2.97   0
   2   7   7  196.23    3.02   0
   2   7  12   10.03    2.81   0
   3   0  -1   -0.64    2.08   0
   3   4   2  953.02    5.67   0
   3   5   3  496.57    4.16   0
   3   7   7   51.63    1.75   0
   4   3   1   24.17    2.22   0
   4   4   2   93.67    2.15   0
   4   5   3  138.13    2.56   0
   4   7   7  176.68    3.18   0
   4   7  10    7.45    1.71   0
   4   7  11    3.86    2.77   0
   5  -4  -3 1127.31    7.37   0
   5   0  -1    0.06    1.45   0
   5   6   5  158.45    2.79   0
   5   7   9    2.07    2.16   0
   6 -11  -5   21.77    2.75   0
   6  -7  -4    1.01    1.94   0
   6  -2  -2  190.17    3.10   0
   6   5   4   41.15    1.80   0
   6   6   6  167.99    2.77   0
   7   2   1  342.31    3.14   0
   7   3   2    7.37    2.02   0
   7   5   5   29.25    2.17   0
   8   0   0 2508.82    7.53   0
   8   3   3   63.43    1.92   0
   8   5   8  233.48    3.39   0
   9  -7  -3    7.49    2.24   0
   9   0   1    1.23    1.48   0
   9   2   3   23.35    1.87   0
  10 -13  -4   11.97    2.58   0
  10  -9  -3   -2.08    1.85   0
  10  -6  -2   44.86    2.59   0
  10  -4  -1   34.69    2.64   0
  10  -1   1  451.71    3.82   0
  10   0   2  150.89    2.91   0
  10   1   3   47.77    2.35   0
  10   2   5    7.43    2.66   0
  11  -8  -2   13.19    2.29   0
  11  -6  -1   -0.27    1.92   0
  11  -4   0    1.86    2.48   0
  11   0   4  129.37    3.04   0
  -9 -16   5   -7.32    2.78   0
  -9 -15   5    1.72    2.07   0
  -9 -12   6    4.13    2.14   0
  -9 -10   7  241.13    3.11   0
  -9  -8   9   15.62    2.72   0
  -9  -7  10   17.92    2.38   0
  -8 -16   3   23.97    2.45   0
  -8 -15   3   67.35    2.09   0
  -8 -11   4   26.43    1.87   0
  -8  -9   5   50.12    2.41   0
  -8  -7   6   65.32    2.34   0
  -8  -5   8    5.10    2.61   0
  -8  -4   9   31.41    1.92   0
  -7 -21   1    2.84    2.05   0
  -7 -20   1   28.30    2.05   0
  -7 -19   1   20.33    2.07   0
  -7 -18   1   31.84    1.88   0
  -7 -12   2   13.87    1.72   0
  -7  -9   3   91.35    2.54   0
  -7  -5   5   -0.67    1.99   0
  -7  -2   8    8.74    2.35   0
  -7  -1  11   20.53    2.79   0
  -6 -17   0   10.02    2.50   0
  -6 -16   0   26.05    2.19   0
  -6 -15   0   72.97    1.86   0
  -5 -16  -1    3.18    2.06   0
  -5 -15  -1   29.04    1.66   0
  -5 -10   0   -0.28    1.90   0
  -5  -7   1  618.51    4.23   0
  -4 -24  -2    3.56    2.45   0
  -4 -23  -2    0.53    2.74   0
  -4 -16  -2    6.36    2.29   0
  -4 -15  -2   14.83    1.63   0
  -4 -10  -1    2.06    1.74   0
  -3 -22  -3   11.26    2.01   0
  -3 -21  -3    2.90    2.13   0
  -3 -20  -3    6.26    2.11   0
  -3 -19  -3   22.86    2.27   0
  -3 -18  -3   76.47    1.95   0
  -3  -7  -1   51.18    2.34   0
  -2 -12  -3  244.65    3.19   0
  -2   5  14   15.05    3.50   0
  -1 -15  -4   19.74    2.26   0
  -1  -9  -3   66.02    2.15   0
  -1   6   7   33.45    2.94   0
  -1   6  13    5.76    2.75   0
   0   7   9  140.18    3.26   0
   0   7  11   70.19    2.90   0
   1 -24  -5    5.60    2.43   0
   1 -23  -5   39.31    2.78   0
   1 -16  -5   18.64    2.20   0
   1   6   5    2.71    1.59   0
   1   7   7  203.45    3.15   0
   1   7  12   21.59    2.80   0
   3   3   1  867.03    5.42   0
   3   7   6  110.96    2.40   0
   3   7  12   18.02    2.14   0
   4   7   6   27.34    2.16   0
   5   3   1  684.17    4.28   0
   5   4   2   85.20    1.90   0
   5   5   3    5.19    1.87   0
   5   7   7    6.07    2.21   0
   5   7   8  180.81    2.73   0
   5   7  10  252.70    3.23   0
   5   7  11   -1.31    2.43   0
   6  -4  -3   22.49    2.10   0
   6   0  -1    0.16    1.97   0
   6   6   5   84.11    2.32   0
   7   1   0   65.18    2.25   0
   7   4   3  135.47    2.21   0
   7   6   7   16.78    2.42   0
   7   6   8    0.11    1.86   0
   7   6   9   15.09    2.02   0
   8 -13  -5   24.02    2.97   0
   8  -3  -2  109.20    2.64   0
   8   4   4    7.15    1.69   0
   8   5   6  100.70    2.76   0
   8   5   7  111.48    2.32   0
   9 -16  -5    2.57    2.61   0
   9 -10  -4   22.37    2.60   0
   9  -4  -2   82.32    2.39   0
   9   3   4  141.97    2.35   0
   9   4   6    4.33    2.63   0
   9   4   7    2.59    1.92   0
  10 -12  -4   13.99    2.31   0
  10  -2   0   -0.47    1.84   0
  10   2   4   10.41    2.50   0
  10   3   6   31.29    2.51   0
  11 -11  -3  117.04    2.88   0
  11  -2   1   12.82    2.27   0
  11  -1   2  135.88    3.08   0
  11   0   3    3.77    2.21   0
  12  -6   0    7.19    2.07   0
  12  -4   1   16.76    2.82   0
  -9 -17   5   22.20    2.15   0
  -9 -14   6   -0.82    2.72   0
  -9 -13   6   35.17    2.14   0
  -9 -11   7    3.67    2.53   0
  -9  -9   8   -1.70    1.97   0
  -8 -19   3   18.64    2.51   0
  -8 -18   3   22.64    2.11   0
  -8 -17   3   87.12    2.37   0
  -8 -12   4   11.82    1.86   0
  -8  -6   7   48.24    1.83   0
  -8  -4  10    8.46    2.25   0
  -8  -4  11    3.39    2.65   0
  -8  -4  12    1.88    2.89   0
  -7 -13   2   39.48    1.73   0
  -7  -7   4   70.34    2.02   0
  -7  -4   6   47.89    2.01   0
  -7  -3   7   27.70    2.14   0
  -6 -22   0   26.11    2.06   0
  -6 -21   0   46.21    2.24   0
  -6 -20   0    3.79    1.95   0
  -6 -19   0   15.95    1.74   0
  -6 -18   0   96.81    2.26   0
  -6 -11   1 1290.88    5.20   0
  -6  -8   2  168.48    2.38   0
  -6  -4   4    7.67    2.06   0
  -6   0   8  923.59    6.64   0
  -5 -23  -1   47.60    2.24   0
  -5 -21  -1   17.23    2.50   0
  -5 -20  -1   -4.87    2.36   0
  -5 -19  -1   58.36    2.63   0
  -5 -18  -1   10.91    2.29   0
  -5 -17  -1  167.18    2.31   0
  -5  -5   2  321.71    3.44   0
  -5  -3   3  566.40    4.23   0
  -4 -22  -2    9.86    1.93   0
  -4 -21  -2  233.24    3.10   0
  -4 -19  -2    4.22    2.13   0
  -4 -18  -2    4.43    1.70   0
  -4 -17  -2   11.51    1.61   0
  -4  -7   0   45.31    2.30   0
  -4  -1   3    8.53    2.19   0
  -3 -11  -2   64.28    1.85   0
  -2 -13  -3  365.97    3.56   0
  -2  -8  -2  474.82    4.25   0
  -2  -5  -1   17.32    2.11   0
  -2   6  10    9.91    2.56   0
  -2   6  11   22.75    3.09   0
  -1 -24  -4   -5.14    2.12   0
  -1 -23  -4    4.53    2.68   0
  -1 -22  -4    8.53    2.45   0
  -1 -17  -4   40.04    2.38   0
  -1 -16  -4   10.89    1.97   0
   0 -12  -4    4.65    1.95   0
   0   4   3   45.82    2.61   0
   0   7   8  156.49    3.34   0
   0   7  12   75.04    3.04   0
   1 -22  -5   -0.50    2.25   0
   1 -21  -5   51.30    2.66   0
   1 -20  -5    4.48    2.31   0
   1 -19  -5   71.34    2.77   0
   1 -18  -5   38.03    2.27   0
   1 -17  -5   63.62    2.40   0
   1   7  13   13.92    2.61   0
   2   4   2  177.37    2.94   0
   2   5   3   96.24    2.41   0
   2   7   6  160.94    2.98   0
   3 -12  -5   74.22    3.48   0
   3   6   4  514.41    3.95   0
   4   2   0   20.75    1.55   0
   4   6   4   73.76    1.83   0
   5   2   0  122.66    2.76   0
   5   6   4   17.90    2.03   0
   5   7   6   23.10    2.27   0
   6   3   1   20.07    1.40   0
   6   4   2  266.47    2.73   0
   6   5   3   41.96    2.06   0
   6   7   7    0.88    2.24   0
   6   7   8   43.18    2.05   0
   6   7   9    9.04    1.88   0
   6   7  10   14.80    2.83   0
   7  -7  -4   67.21    2.51   0
   7  -2  -2   41.56    2.15   0
   7   5   4   44.04    1.92   0
   7   6   6   -1.44    1.72   0
   8  -8  -4  144.86    3.14   0
   8  -5  -3  102.73    2.69   0
   8  -1  -1    2.96    1.65   0
   8   2   1   64.93    2.48   0
   8   3   2   22.60    2.48   0
   8   5   5   59.09    2.67   0
   9 -15  -5    3.69    2.86   0
   9  -6  -3   45.73    2.28   0
   9  -2  -1   23.06    1.64   0
   9   1   1   68.57    2.41   0
   9   2   2    9.15    1.46   0
   9   3   3   79.14    2.70   0
   9   4   5    1.13    1.76   0
  10  -8  -3   23.39    1.95   0
  10  -5  -2   -0.89    2.45   0
  10  -3  -1   66.36    2.73   0
  10   0   1    1.44    2.30   0
  10   1   2   21.24    2.46   0
  10   3   5    6.00    2.63   0
  11 -10  -3   11.72    2.55   0
  11  -7  -2   -1.25    2.57   0
  11  -5  -1   67.44    2.17   0
  11  -3   0   20.55    2.49   0
  11   1   4   12.99    1.99   0
  12  -7  -1   39.62    2.93   0
  12  -5   0    0.46    2.77   0
  -9 -16   6    1.65    2.83   0
  -9 -15   6   28.38    2.09   0
  -9 -12   7    5.26    2.33   0
  -9 -10   8    2.04    1.99   0
  -9  -9   9   20.84    2.43   0
  -9  -8  10    2.61    2.03   0
  -8 -14   4   81.29    2.71   0
  -8 -13   4   81.25    2.07   0
  -8 -10   5   23.40    1.72   0
  -8  -8   6   11.53    1.70   0
  -8  -7   7   79.29    2.70   0
  -8  -5   9    5.90    2.36   0
  -7 -16   2   -3.56    2.48   0
  -7 -15   2  162.28    2.83   0
  -7 -14   2   42.50    1.67   0
  -7 -10   3   44.42    1.74   0
  -7  -8   4    8.06    2.26   0
  -7  -6   5  193.91    2.96   0
  -7  -2   9    2.09    2.16   0
  -6 -12   1   14.65    1.63   0
  -6  -6   3   -0.14    1.40   0
  -6  -3   5   22.96    2.10   0
  -5 -11   0    7.16    1.46   0
  -4 -11  -1  520.13    3.66   0
  -3 -12  -2   59.00    2.23   0
  -3   5  12   38.90    4.49   0
  -2 -14  -3  253.58    3.24   0
  -1 -21  -4   20.10    1.93   0
  -1 -20  -4   14.17    2.20   0
  -1 -19  -4   31.77    2.24   0
  -1 -18  -4    1.77    1.49   0
  -1 -10  -3   26.77    2.30   0
  -1  -6  -2  671.97    5.55   0
  -1   5   5    1.08    2.52   0
   0   5   4   79.14    3.08   0
   1 -10  -4  108.86    3.24   0
   1  -6  -3  131.29    4.09   0
   2 -14  -5   54.03    2.55   0
   2   3   1  842.65    6.34   0
   2   6   4   74.83    2.72   0
   2   8   9    2.57    2.23   0
   2   8  10    4.86    2.55   0
   3  -4  -3  984.61   10.73   0
   3   2   0   27.74    2.31   0
   3   8   8  329.20    3.64   0
   3   8   9    2.82    1.70   0
   3   8  10   75.96    2.24   0
   3   8  11   34.21    2.51   0
   4   7   5    2.69    1.98   0
   4   8   8   22.37    2.34   0
   4   8   9   35.97    2.69   0
   4   8  10   13.50    2.52   0
   6   2   0    9.38    1.37   0
   6   6   4  160.11    2.71   0
   6   7   6   46.92    2.29   0
   7 -11  -5  232.28    4.62   0
   7  -4  -3  271.61    3.41   0
   7   0  -1   -0.44    1.38   0
   7   3   1  787.71    4.25   0
   7   4   2   54.57    2.26   0
   7   6   5   -2.04    1.53   0
   8 -12  -5   42.09    2.95   0
   8   1   0  826.58    4.71   0
   8   4   3   10.97    1.67   0
   8   5   4   12.09    1.92   0
   8   6   7   48.55    2.81   0
   8   6   8    1.69    2.09   0
   9  -9  -4   63.13    2.92   0
   9   0   0  130.86    2.33   0
   9   4   4   12.18    2.54   0
   9   5   6   10.60    2.30   0
   9   5   7   -0.23    1.98   0
  10 -11  -4   23.21    2.70   0
  10  -7  -3   47.29    2.45   0
  10  -1   0    0.25    2.31   0
  10   2   3   33.16    1.94   0
  10   3   4    3.76    2.51   0
  11  -4  -1   15.73    2.27   0
  11  -1   1   18.62    2.48   0
  11   0   2  151.99    3.13   0
  11   1   3   34.46    2.64   0
  12  -3   1    1.38    2.08   0
  -9 -14   7   11.54    2.85   0
  -9 -13   7   29.60    2.14   0
  -9 -11   8   30.97    2.22   0
  -9 -10   9  116.41    3.11   0
  -9  -9  10    3.94    2.45   0
  -8 -17   4   -3.49    2.71   0
  -8 -16   4    9.99    2.34   0
  -8 -15   4    3.58    1.94   0
  -8 -11   5  104.38    2.43   0
  -8  -9   6   24.96    2.28   0
  -8  -6   8  179.97    2.87   0
  -8  -5  10    5.14    2.52   0
  -7 -21   2   -1.92    2.08   0
  -7 -20   2   12.28    1.96   0
  -7 -19   2   71.11    2.68   0
  -7 -17   2   22.42    1.89   0
  -7 -11   3   26.11    1.78   0
  -7  -5   6   20.01    2.18   0
  -7  -3   8    2.82    2.30   0
  -7  -2  10    6.06    2.51   0
  -7  -2  13   55.10    3.67   0
  -6 -14   1   21.62    2.34   0
  -6 -13   1  421.27    3.24   0
  -6  -9   2   51.60    1.71   0
  -6  -2   6    1.26    1.95   0
  -6  -1   7  233.46    3.52   0
  -5 -12   0   59.06    1.80   0
  -5  -8   1    0.08    1.24   0
  -5  -2   4  370.38    3.94   0
  -5   1   7  105.86    3.11   0
  -5   2   9  571.04    6.91   0
  -5   2  13   -0.91    4.21   0
  -4 -12  -1   -1.52    1.40   0
  -4  -8   0  110.68    2.52   0
  -4  -5   1   12.84    1.55   0
  -4  -3   2 1224.88    6.59   0
  -4   0   4 5474.88   15.98   0
  -4   2   6   71.10    3.29   0
  -3 -13  -2 1090.99    5.21   0
  -3  -8  -1  250.97    3.26   0
  -3  -5   0  433.05    4.05   0
  -2 -24  -3    1.45    2.40   0
  -2 -23  -3    3.76    2.68   0
  -2 -15  -3   64.17    2.37   0
  -2   2   3   76.85    4.32   0
  -2   6   9    3.73    2.55   0
  -2   6  12   23.76    3.21   0
   0 -13  -4  108.34    2.71   0
   0  -2  -1    1.98    3.22   0
   0   3   2  135.04    4.43   0
   0   7  13   20.48    2.63   0
   1   7   6  744.79    5.42   0
   1   8   9    8.95    1.99   0
   1   8  10   73.78    2.75   0
   2 -24  -5   -1.42    2.48   0
   2 -15  -5   51.01    2.59   0
   2   8   8   53.93    1.98   0
   2   8  11    8.57    1.91   0
   3   7   5  179.46    2.55   0
   3   8   7    7.43    2.20   0
   3   8  12    6.48    2.41   0
   4   8   7   81.09    2.72   0
   4   8  11    4.40    1.89   0
   5  -1  -2    3.58    1.69   0
   5   1  -1  160.30    2.80   0
   5   7   5  221.28    2.71   0
   5   8   8  193.24    3.20   0
   5   8   9   19.91    1.96   0
   5   8  10  133.28    3.30   0
   6  -1  -2  170.28    3.01   0
   7   2   0   27.59    2.09   0
   7   5   3    3.27    1.47   0
   7   7   7   79.95    2.20   0
   7   7   8  139.33    2.50   0
   7   7   9   84.31    2.34   0
   8  -2  -2   10.89    2.12   0
   8   6   6  163.15    2.53   0
   9 -14  -5   37.53    2.97   0
   9  -3  -2    7.24    1.61   0
   9  -1  -1    0.65    2.25   0
   9   3   2   13.61    1.88   0
   9   5   5    4.47    2.32   0
  10  -4  -2   80.09    2.66   0
  10  -2  -1   -2.11    2.13   0
  10   2   2   12.60    2.06   0
  10   4   5    8.71    2.53   0
  10   4   6   14.02    2.10   0
  11  -9  -3   17.43    2.14   0
  11  -6  -2   50.02    2.20   0
  11  -2   0   22.29    2.58   0
  11   2   4   -0.57    2.01   0
  12  -6  -1    0.61    2.01   0
  12  -4   0   -0.80    1.99   0
  -9 -15   7   16.38    2.06   0
  -9 -13   8   13.21    2.93   0
  -9 -12   8   -2.53    1.92   0
  -9 -11   9   20.82    2.56   0
  -9 -10  10   -1.56    2.77   0
  -8 -19   4    6.79    2.13   0
  -8 -18   4   44.45    2.11   0
  -8 -13   5   26.86    2.46   0
  -8 -12   5   41.80    2.11   0
  -8 -10   6    5.78    2.49   0
  -8  -8   7   19.18    2.37   0
  -8  -7   8    3.42    2.47   0
  -8  -6   9   -4.22    2.51   0
  -8  -5  11   -1.48    2.77   0
  -8  -5  12   21.80    3.02   0
  -7 -13   3    2.82    2.06   0
  -7 -12   3   98.05    2.16   0
  -7  -9   4   87.05    2.11   0
  -7  -7   5   36.45    2.35   0
  -7  -4   7   60.66    2.35   0
  -7  -2  11   51.90    2.89   0
  -7  -2  12    0.15    2.68   0
  -6 -22   1   14.08    2.56   0
  -6 -21   1   32.70    2.99   0
  -6 -17   1   45.68    2.58   0
  -6 -16   1   15.86    1.97   0
  -6 -15   1   63.52    1.90   0
  -6 -10   2   11.29    1.49   0
  -6  -7   3  406.37    3.23   0
  -6  -5   4  220.67    2.70   0
  -6   0   9    1.63    2.10   0
  -5 -14   0    6.58    2.15   0
  -5 -13   0  662.16    3.92   0
  -5  -9   1   19.01    1.95   0
  -5  -6   2  593.80    4.24   0
  -5  -4   3 1210.25    5.98   0
  -5  -1   5  249.20    3.64   0
  -5   0   6  182.95    3.40   0
  -4 -24  -1    6.84    2.88   0
  -4 -13  -1    6.64    1.60   0
  -4   1   5  151.45    3.77   0
  -3 -24  -2   -3.16    2.67   0
  -3 -14  -2  112.33    2.61   0
  -3  -1   2  411.02    4.56   0
  -2 -22  -3   -1.92    1.91   0
  -2 -21  -3   42.75    2.60   0
  -2 -20  -3   -2.94    2.53   0
  -2 -19  -3    2.71    2.26   0
  -2 -18  -3   15.85    2.25   0
  -2 -17  -3   72.68    2.62   0
  -2 -16  -3    2.26    1.59   0
  -2  -9  -2  130.71    2.56   0
  -2  -3   0    1.67    1.67   0
  -2  -1   1 2475.68   12.56   0
  -1   7  10   29.00    2.66   0
  -1   7  11    2.51    2.48   0
   0 -24  -4   22.07    2.99   0
   0 -14  -4   66.76    2.45   0
   0  -8  -3   80.24    2.83   0
   0   6   5 1119.27    7.98   0
   0   7   7  249.02    3.85   0
   1   1   0 1426.90   12.31   0
   1   5   3  394.75    4.50   0
   1   8  11   31.29    2.60   0
   2 -23  -5   30.17    2.26   0
   2 -22  -5   42.11    2.96   0
   2 -16  -5   31.79    2.77   0
   2   0  -1    0.23    1.90   0
   2   7   5   21.12    1.64   0
   2   8   7   58.81    2.40   0
   2   8  12   22.85    2.12   0
   4  -1  -2 1666.20    8.47   0
   4   1  -1   -1.27    1.91   0
   4   4   1   18.15    2.12   0
   4   5   2  191.73    2.59   0
   4   6   3  331.86    3.48   0
   4   8   6   13.67    2.10   0
   5  -6  -4  839.67    7.81   0
   5  -3  -3  553.13    5.22   0
   5   4   1   86.86    2.40   0
   5   5   2   18.02    1.38   0
   5   6   3  343.06    3.40   0
   5   8   7  105.40    2.14   0
   5   8  11   -0.85    2.01   0
   6 -10  -5   14.48    2.96   0
   6  -6  -4  625.28    5.63   0
   6  -3  -3   56.17    2.45   0
   6   1  -1   -0.78    1.49   0
   6   5   2   72.02    2.23   0
   6   7   5    5.32    1.77   0
   6   8   8   13.05    2.63   0
   6   8   9    3.78    1.84   0
   6   8  10   13.55    2.80   0
   7  -1  -2   19.26    1.97   0
   7   6   4   20.07    1.71   0
   7   7   6   12.64    1.81   0
   8  -7  -4   13.42    2.43   0
   8  -4  -3   37.75    2.34   0
   8   0  -1   -1.67    1.62   0
   8   3   1  211.66    2.99   0
   8   4   2  556.04    3.60   0
   8   5   3   -5.06    2.10   0
   8   6   5  188.58    2.53   0
   8   7   8   34.50    2.64   0
   9 -13  -5   -0.80    2.88   0
   9  -8  -4   15.52    2.39   0
   9  -5  -3   -0.79    1.51   0
   9   1   0   -1.70    2.20   0
   9   2   1   39.94    1.73   0
   9   4   3  382.08    3.20   0
   9   6   7    1.77    2.77   0
  10 -10  -4   13.24    2.68   0
  10  -6  -3   51.38    2.41   0
  10   0   0   87.80    2.96   0
  10   1   1  428.41    3.35   0
  10   3   3   73.35    2.11   0
  10   4   4    0.10    2.37   0
  11  -8  -3   42.24    2.79   0
  11  -3  -1   -3.94    2.48   0
  11   0   1   -1.18    2.43   0
  11   1   2  135.05    3.02   0
  11   2   3   -3.79    2.61   0
  12  -5  -1   -3.92    2.80   0
  12  -3   0   42.71    2.62   0
  12  -2   1   43.19    2.20   0
  -9 -14   8   24.25    2.21   0
  -9 -12   9    1.78    2.53   0
  -8 -15   5   94.58    2.81   0
  -8 -14   5   10.63    1.95   0
  -8 -11   6   58.41    2.61   0
  -8  -6  10   18.09    2.63   0
  -7 -15   3   61.60    2.79   0
  -7 -14   3   41.85    1.91   0
  -7 -10   4   -5.77    2.14   0
  -7  -6   6   26.64    2.28   0
  -7  -3   9    0.62    2.32   0
  -6 -20   1   33.96    1.89   0
  -6 -19   1   75.79    2.22   0
  -6 -18   1   43.54    1.99   0
  -6 -11   2  108.17    2.17   0
  -6  -8   3  181.64    2.72   0
  -6  -4   5  507.76    4.08   0
  -6   0  10  307.31    4.84   0
  -6   0  13    0.24    3.15   0
  -5 -23   0    2.34    2.06   0
  -5 -22   0    8.18    2.50   0
  -5 -21   0   45.46    2.67   0
  -5 -20   0    5.61    2.53   0
  -5 -17   0   88.93    2.53   0
  -5 -16   0  106.72    2.58   0
  -5 -15   0   58.04    1.97   0
  -4 -23  -1   27.13    2.10   0
  -4 -22  -1    7.45    2.48   0
  -4 -15  -1   84.31    2.47   0
  -4 -14  -1    0.07    1.57   0
  -4  -9   0   21.68    2.00   0
  -3 -23  -2    9.07    2.03   0
  -3 -22  -2   -5.32    2.24   0
  -3 -21  -2    1.23    2.41   0
  -3 -16  -2    5.91    2.20   0
  -3 -15  -2  282.12    2.86   0
  -3  -9  -1    9.32    2.05   0
  -3  -3   1   87.76    2.30   0
  -1 -11  -3   80.48    2.12   0
  -1   7   9   32.97    2.44   0
  -1   7  12   -0.07    2.85   0
   0 -23  -4   -0.64    2.37   0
   0 -22  -4  133.07    3.44   0
   0 -15  -4   88.70    2.71   0
   1   4   2 4123.72   14.80   0
   1   6   4  249.42    3.71   0
   1   8   8  479.48    4.31   0
   1   8  12    3.36    2.70   0
   2 -21  -5    8.54    2.25   0
   2 -20  -5   36.98    2.60   0
   2 -19  -5   18.63    2.54   0
   2 -18  -5    0.32    2.19   0
   2 -17  -5   76.46    2.78   0
   3 -13  -5   22.80    2.71   0
   3   5   2  469.06    3.99   0
   3   6   3  115.32    2.44   0
   3   8   6  220.64    2.68   0
   4   7   4   25.22    1.64   0
   5   3   0   82.64    2.41   0
   5   7   4  657.39    3.85   0
   5   8   6  163.27    2.50   0
   6   4   1   34.17    1.62   0
   6   6   3   19.62    1.56   0
   6   8   6   17.27    2.04   0
   6   8   7    7.55    1.75   0
   7  -6  -4  155.22    3.18   0
   7  -3  -3  178.86    2.96   0
   7   1  -1   24.55    1.53   0
   7   5   2   15.05    2.26   0
   7   7   5   44.79    1.72   0
   7   8   8   37.66    2.40   0
   7   8   9    6.57    2.78   0
   8 -11  -5  119.05    3.94   0
   8   2   0   43.85    1.81   0
   8   6   4  203.86    3.01   0
   8   7   6   20.66    2.40   0
   8   7   7   29.60    2.07   0
   9  -2  -2   81.66    2.57   0
   9   5   4   43.77    1.93   0
   9   6   6    3.62    2.08   0
  10  -9  -4   -0.43    2.22   0
  10  -3  -2   43.18    2.51   0
  10   5   6  107.59    2.48   0
  11 -12  -4    3.54    2.80   0
  11  -5  -2    8.56    1.98   0
  11  -1   0  112.53    2.22   0
  11   3   4   63.78    2.28   0
  12  -7  -2   26.78    2.22   0
  12  -1   1   36.78    2.56   0
  -8 -19   5   17.32    2.15   0
  -8 -18   5   47.96    2.27   0
  -8 -17   5   -0.88    2.03   0
  -8 -16   5   35.32    2.15   0
  -8 -12   6    1.97    2.21   0
  -8 -10   7   18.98    2.38   0
  -8  -8   8   42.31    2.35   0
  -8  -7   9   50.50    2.84   0
  -8  -6  11    3.57    2.67   0
  -8  -6  12   -0.71    3.01   0
  -7 -21   3    0.92    2.04   0
  -7 -20   3   11.60    1.94   0
  -7 -19   3   94.03    2.80   0
  -7 -18   3   15.03    2.40   0
  -7 -17   3   93.49    2.32   0
  -7 -16   3  190.97    2.62   0
  -7 -11   4   14.76    2.02   0
  -7  -8   5    1.14    1.53   0
  -7  -5   7   55.42    2.61   0
  -7  -4   8  124.36    2.84   0
  -6 -12   2   27.08    1.80   0
  -6  -6   4  617.17    4.23   0
  -6  -1   8  113.79    3.06   0
  -6   0  11   -2.95    2.78   0
  -6   0  12   17.67    3.19   0
  -5 -19   0    3.59    1.80   0
  -5 -18   0   26.83    1.91   0
  -5 -10   1  207.68    2.58   0
  -5  -7   2  464.99    3.82   0
  -5   2  10   -0.39    2.88   0
  -4 -21  -1   -2.07    1.81   0
  -4 -20  -1    3.88    1.80   0
  -4 -19  -1   42.32    2.52   0
  -4 -18  -1   25.67    2.02   0
  -4 -17  -1  393.30    3.22   0
  -4 -16  -1   55.03    2.12   0
  -4  -6   1   33.41    1.70   0
  -3 -20  -2    3.42    1.82   0
  -3 -19  -2   21.83    1.92   0
  -3 -18  -2   15.49    1.71   0
  -3 -17  -2  297.77    3.02   0
  -3  -6   0  970.76    5.50   0
  -2 -10  -2   50.69    1.92   0
  -2  -6  -1 1103.38    6.06   0
  -2   6  13    4.93    3.13   0
  -1 -25  -3   30.04    2.62   0
  -1 -12  -3  199.58    3.07   0
  -1  -7  -2  232.84    3.46   0
   0 -21  -4   43.45    2.47   0
   0 -20  -4   33.86    2.56   0
   0 -19  -4   21.49    2.54   0
   0 -18  -4  165.09    3.10   0
   0 -17  -4   -0.57    2.34   0
   0 -16  -4   -0.63    1.92   0
   0   8  10   39.30    2.49   0
   0   8  11   13.95    2.26   0
   1 -11  -4    0.48    1.70   0
   1   8   7  123.59    2.78   0
   1   8  13    6.30    2.41   0
   2  -2  -2   93.95    4.58   0
   2   2   0  606.00    6.05   0
   2   8   6   31.85    2.15   0
   3 -24  -5   23.36    2.20   0
   3   4   1 1937.36    7.76   0
   3   7   4  923.76    5.07   0
   3   9   8    3.89    1.98   0
   3   9   9   42.13    2.74   0
   3   9  10   24.54    2.71   0
   3   9  11   64.65    2.65   0
   4  -3  -3  350.00    5.20   0
   4   3   0    0.40    2.15   0
   4   8   5    4.45    1.85   0
   4   9   8   -3.17    2.31   0
   4   9   9   56.59    2.13   0
   4   9  10   51.40    2.16   0
   4   9  11   12.39    2.80   0
   5 -10  -5  231.11    8.41   0
   5   8   5  149.09    2.64   0
   5   9   8   34.91    2.31   0
   5   9   9   15.33    2.48   0
   5   9  10   11.00    2.72   0
   6   3   0   15.22    1.37   0
   6   7   4    0.13    1.54   0
   7 -10  -5  568.81    6.23   0
   7   3   0   36.03    2.00   0
   7   4   1  280.55    2.80   0
   7   6   3    8.01    1.53   0
   7   8   7   52.02    2.02   0
   8  -1  -2  209.24    3.08   0
   8   1  -1    4.97    2.11   0
   8   7   5   16.28    2.18   0
   9 -12  -5   10.72    2.69   0
   9  -7  -4   30.99    2.08   0
   9  -4  -3   29.62    2.27   0
   9   0  -1    1.77    1.49   0
   9   3   1    3.01    2.09   0
   9   4   2   16.67    1.75   0
   9   5   3   33.20    2.38   0
   9   6   5   18.28    1.91   0
  10  -1  -1  123.28    2.45   0
  10   1   0   -2.05    2.17   0
  10   2   1   15.53    1.76   0
  10   3   2   46.28    2.10   0
  10   4   3   -0.31    1.82   0
  11 -11  -4    7.35    2.82   0
  11  -7  -3   12.15    2.73   0
  11  -4  -2   10.33    2.24   0
  11  -2  -1   59.14    2.68   0
  11   1   1   28.62    2.50   0
  11   2   2    5.79    2.61   0
  11   3   3   76.36    3.01   0
  12  -6  -2    1.60    2.81   0
  12  -4  -1   26.06    2.14   0
  12  -2   0   -1.03    2.79   0
  -8 -14   6  253.38    3.49   0
  -8 -13   6   20.13    2.05   0
  -8 -11   7  145.91    2.96   0
  -8  -9   8   45.21    2.60   0
  -8  -7  10   78.16    3.03   0
  -7 -12   4   34.61    1.83   0
  -7  -9   5  149.18    3.12   0
  -7  -7   6   13.48    2.63   0
  -7  -3  10    7.56    2.25   0
  -7  -3  13   -0.40    2.99   0
  -6 -22   2   11.38    2.82   0
  -6 -14   2    9.35    2.38   0
  -6 -13   2    0.53    1.55   0
  -6  -9   3   72.53    1.94   0
  -6  -3   6  151.24    2.47   0
  -6  -2   7  437.02    4.33   0
  -5 -11   1   26.19    1.66   0
  -5  -5   3   31.66    2.34   0
  -5  -3   4    0.25    1.56   0
  -5   2  11   94.60    4.41   0
  -5   2  12    5.24    3.44   0
  -4 -10   0   31.28    1.51   0
  -4  -4   2  515.00    4.45   0
  -4  -2   3    9.26    1.70   0
  -4   3   8   25.74    3.32   0
  -3 -10  -1   56.18    1.81   0
  -3   5  13    3.28    4.82   0
  -2 -25  -2   60.86    3.17   0
  -2 -11  -2  364.34    3.74   0
  -1 -24  -3   20.47    2.02   0
  -1 -23  -3  160.78    3.49   0
  -1 -13  -3  312.31    3.58   0
  -1   6   6    6.94    2.13   0
  -1   7   8  155.51    3.87   0
  -1   7  13   44.96    3.44   0
   0   8   9    8.89    2.51   0
   0   8  12    4.11    2.88   0
   1   7   5   24.95    2.36   0
   2  -9  -4   18.83    2.61   0
   2   6   3  201.07    3.33   0
   2   9   9    5.83    2.16   0
   2   9  10    1.88    1.80   0
   2   9  11    3.95    2.52   0
   3 -23  -5    4.65    2.37   0
   3   1  -1   63.99    2.16   0
   3   8   5  160.33    2.78   0
   3   9  12   13.75    2.89   0
   4   9   7   16.89    2.34   0
   5   9   7   -0.84    2.03   0
   6   0  -2    6.11    2.10   0
   6   8   5   -0.86    1.65   0
   6   9   8   31.66    2.57   0
   6   9   9  108.73    2.59   0
   6   9  10    5.88    2.76   0
   7   7   4   27.91    1.78   0
   7   8   6  278.80    2.91   0
   8  -6  -4   66.30    2.85   0
   8  -3  -3   14.87    1.69   0
   8   4   1   78.76    1.99   0
   8   5   2    5.80    1.69   0
   8   6   3   51.27    2.26   0
   8   8   7    6.77    2.70   0
   8   8   8   17.51    2.15   0
   9   2   0   80.90    2.09   0
   9   6   4   39.91    1.94   0
   9   7   6  245.27    3.38   0
   9   7   7    9.52    2.07   0
  10 -14  -5    8.96    3.03   0
  10  -8  -4  131.00    3.15   0
  10  -5  -3   53.03    2.08   0
  10   5   4  107.71    2.38   0
  11 -10  -4   -2.01    2.33   0
  11   0   0   18.65    1.74   0
  11   4   4   10.80    2.04   0
  12  -3  -1    5.94    2.34   0
  12   0   1    1.16    2.73   0
  -8 -18   6   40.76    2.75   0
  -8 -17   6   25.73    2.19   0
  -8 -16   6    9.84    2.21   0
  -8 -15   6    4.44    1.92   0
  -8 -12   7   15.63    2.63   0
  -8 -10   8   17.45    2.53   0
  -8  -8   9    2.31    1.86   0
  -8  -7  11   47.86    2.59   0
  -7 -21   4    5.80    2.92   0
  -7 -15   4    9.99    2.73   0
  -7 -14   4   43.91    2.48   0
  -7 -13   4   22.83    1.77   0
  -7 -10   5  578.72    4.22   0
  -7  -6   7   21.27    2.40   0
  -7  -4   9  147.24    3.27   0
  -7  -3  11    7.91    2.36   0
  -7  -3  12   38.43    3.07   0
  -6 -21   2   93.55    2.51   0
  -6 -20   2   16.08    2.09   0
  -6 -18   2   49.67    2.38   0
  -6 -17   2   10.60    2.30   0
  -6 -16   2   11.50    1.64   0
  -6 -15   2   -0.22    1.70   0
  -6 -10   3  218.78    2.85   0
  -6  -7   4   -4.64    1.88   0
  -6  -5   5   27.76    2.08   0
  -5 -23   1    6.95    2.93   0
  -5 -13   1   17.75    2.34   0
  -5 -12   1    0.23    1.51   0
  -5  -8   2  213.63    2.72   0
  -5   1   8  877.28    7.08   0
  -4 -24   0    9.13    2.92   0
  -4 -11   0   91.83    2.00   0
  -4  -7   1  181.81    3.03   0
  -3 -25  -1   18.44    2.61   0
  -3 -11  -1   67.52    2.24   0
  -3   0   3   -0.90    2.00   0
  -2 -24  -2   12.38    2.76   0
  -2   6   8    7.02    2.64   0
  -1 -22  -3   21.43    2.69   0
  -1 -14  -3   34.16    2.15   0
   0  -9  -3  443.15    4.60   0
   0  -5  -2 1470.91   10.04   0
   0   7   6  415.41    4.84   0
   1 -24  -4   -2.31    2.52   0
   1 -12  -4  409.98    4.59   0
   2   5   2   17.49    1.66   0
   2   7   4  136.89    2.95   0
   2   9   8    1.90    1.73   0
   2   9  12   16.26    2.72   0
   3 -22  -5   34.72    2.64   0
   3 -14  -5   59.41    2.80   0
   3  -1  -2  420.77    5.16   0
   3   9   7    3.77    1.65   0
   4   6   2    3.80    1.99   0
   4   7   3    3.00    1.84   0
   4   9   6   64.41    2.34   0
   5   0  -2  202.16    3.00   0
   5   2  -1   20.25    2.26   0
   5   5   1   52.40    2.14   0
   5   6   2   40.41    1.59   0
   5   7   3  120.02    2.10   0
   5   9   6   14.38    2.35   0
   6  -5  -4  223.41    3.61   0
   6  -2  -3 2580.56    9.21   0
   6   2  -1  838.70    4.72   0
   6   5   1   36.50    2.18   0
   6   6   2  139.46    2.21   0
   6   7   3   -0.41    1.91   0
   6   9   7   61.95    2.19   0
   7  -5  -4    2.57    1.84   0
   7   0  -2 1045.94    5.16   0
   7   2  -1  124.47    2.52   0
   7   6   2  378.94    3.26   0
   7   8   5   23.12    1.83   0
   7   9   8   87.53    3.01   0
   7   9   9   -0.15    2.81   0
   8 -10  -5   22.79    2.29   0
   8   3   0  727.80    4.15   0
   8   7   4    0.71    1.85   0
   8   8   6   -0.02    1.85   0
   9 -11  -5    1.05    2.29   0
   9  -1  -2   34.48    1.81   0
   9   1  -1    2.98    2.19   0
   9   5   2   11.22    2.12   0
   9   7   5   11.67    2.44   0
  10 -13  -5   -0.72    2.95   0
  10  -2  -2    3.54    1.73   0
  10   0  -1    7.46    1.78   0
  10   3   1  105.97    2.81   0
  10   4   2   23.25    1.90   0
  10   5   3   95.64    2.83   0
  10   6   5   -2.63    2.01   0
  11  -6  -3   33.89    2.15   0
  11  -3  -2    3.58    2.38   0
  11  -1  -1    5.43    2.39   0
  11   2   1   10.80    2.43   0
  11   3   2   78.40    3.03   0
  11   4   3  168.33    3.40   0
  12  -5  -2   23.03    2.14   0
  12  -1   0    4.40    2.03   0
  -8 -14   7   -4.58    2.62   0
  -8 -13   7   13.77    2.01   0
  -8 -11   8   20.08    2.62   0
  -8  -9   9   19.40    1.99   0
  -8  -8  10    5.77    2.04   0
  -8  -8  11   12.16    2.81   0
  -7 -20   4    3.63    2.19   0
  -7 -19   4    8.81    2.10   0
  -7 -18   4    0.68    2.00   0
  -7 -17   4    1.02    1.82   0
  -7 -16   4   -1.18    1.81   0
  -7 -11   5  229.77    3.04   0
  -7  -8   6  425.01    3.51   0
  -7  -5   8  186.42    2.73   0
  -6 -11   3  553.31    3.94   0
  -6  -4   6   24.51    2.18   0
  -6  -1   9   62.93    2.62   0
  -5 -22   1   45.78    2.40   0
  -5 -21   1    3.04    2.34   0
  -5 -20   1   34.36    2.72   0
  -5 -15   1   24.32    2.49   0
  -5 -14   1  329.64    3.04   0
  -5  -2   5  329.32    3.58   0
  -4 -23   0    2.11    2.59   0
  -4 -12   0   26.55    1.60   0
  -3 -24  -1   18.92    2.20   0
  -3 -23  -1  135.30    3.29   0
  -3 -12  -1    1.80    1.95   0
  -3  -7   0  288.40    3.50   0
  -3  -4   1  816.61    5.61   0
  -2 -23  -2   -2.71    1.95   0
  -2 -22  -2   48.48    2.82   0
  -2 -13  -2   62.83    2.42   0
  -2 -12  -2   41.93    1.72   0
  -2  -7  -1  766.98    5.05   0
  -2  -4   0   62.68    2.77   0
  -1 -21  -3   37.64    2.05   0
  -1 -20  -3   38.08    2.54   0
  -1 -19  -3   36.09    2.43   0
  -1 -18  -3  194.07    3.17   0
  -1 -17  -3  173.11    3.24   0
  -1 -16  -3   86.78    2.61   0
  -1 -15  -3   48.51    2.16   0
  -1  -8  -2 1370.85    7.32   0
   0   8   8   28.32    2.45   0
   0   8  13   18.81    2.59   0
   1 -23  -4   -1.78    2.05   0
   1 -22  -4   21.98    2.67   0
   1   3   1 4513.47   16.79   0
   1   9   9   86.45    2.71   0
   1   9  10   83.12    3.16   0
   1   9  11  105.21    3.18   0
   2   8   5  373.14    3.72   0
   2   9   7   27.56    2.28   0
   3 -21  -5    7.05    2.36   0
   3 -20  -5   26.74    2.59   0
   3 -15  -5  116.91    3.83   0
   3   3   0  521.31    4.51   0
   3   9   6  253.61    3.23   0
   4  -6  -4    1.94    2.38   0
   4   5   1  173.59    2.90   0
   4   8   4   11.09    1.99   0
   4  10   9  205.59    3.15   0
   4  10  10   67.49    2.74   0
   5   8   4  431.44    3.29   0
   5  10   9   20.59    2.32   0
   5  10  10    3.06    2.35   0
   6   4   0  138.63    2.45   0
   6   8   4   38.20    1.84   0
   6   9   6   72.18    2.11   0
   7  -9  -5  156.53    4.13   0
   7  -2  -3    7.59    1.45   0
   7   5   1    3.24    1.49   0
   7   7   3   37.05    1.70   0
   7   9   6   95.50    2.52   0
   7   9   7    3.61    1.66   0
   8  -5  -4  230.28    3.37   0
   8   0  -2   72.42    2.01   0
   8   2  -1  127.56    2.78   0
   8   6   2   41.14    2.14   0
   8   8   5    7.79    2.37   0
   8   9   8   44.80    2.64   0
   9  -6  -4    6.44    2.19   0
   9  -3  -3   45.34    1.93   0
   9   3   0  294.89    3.22   0
   9   4   1  917.22    4.45   0
   9   6   3   -4.21    1.78   0
   9   7   4   40.45    2.38   0
  10  -7  -4  106.84    2.98   0
  10  -4  -3    5.10    1.78   0
  10   2   0    1.25    1.76   0
  10   6   4   10.65    2.07   0
  11  -9  -4   -0.32    2.57   0
  11  -5  -3   22.77    2.39   0
  11   1   0   97.02    2.21   0
  11   5   4    0.08    1.91   0
  12  -7  -3   28.49    2.88   0
  12  -4  -2   21.35    2.46   0
  12  -2  -1   13.35    2.84   0
  12   1   1   37.63    2.27   0
  -8 -17   7   19.68    2.33   0
  -8 -16   7   -1.58    2.17   0
  -8 -15   7   65.63    2.53   0
  -8 -13   8  202.77    3.47   0
  -8 -12   8   -0.25    1.89   0
  -8 -10   9   30.94    2.12   0
  -8  -9  10   57.38    2.90   0
  -7 -13   5   13.55    2.41   0
  -7 -12   5    2.60    1.60   0
  -7  -9   6   91.69    2.48   0
  -7  -7   7  376.13    3.67   0
  -7  -4  10   10.45    1.90   0
  -7  -4  11    4.90    2.60   0
  -6 -22   3   18.64    2.84   0
  -6 -13   3   80.71    2.69   0
  -6 -12   3  131.66    2.23   0
  -6  -8   4   85.57    1.99   0
  -6  -6   5   21.40    2.01   0
  -6  -3   7   60.20    2.63   0
  -6  -2   8   58.72    2.59   0
  -6  -1  10    3.81    2.73   0
  -5 -19   1   12.12    1.79   0
  -5 -18   1    1.62    1.88   0
  -5 -17   1  212.06    2.61   0
  -5 -16   1   12.51    1.73   0
  -5  -9   2  367.71    3.06   0
  -5  -6   3  331.70    3.22   0
  -5  -4   4   10.75    2.26   0
  -5  -1   6  290.90    3.87   0
  -5   0   7    0.07    2.07   0
  -4 -22   0   23.38    1.98   0
  -4 -21   0  422.95    3.96   0
  -4 -20   0   11.03    2.71   0
  -4 -14   0   12.20    2.08   0
  -4 -13   0   20.57    1.57   0
  -4  -8   1  113.69    2.49   0
  -4  -5   2   26.60    2.19   0
  -4  -1   4  577.43    5.37   0
  -4   3  14   10.48    5.65   0
  -3 -22  -1   13.32    1.87   0
  -3 -21  -1   76.44    2.85   0
  -3 -13  -1   15.80    2.10   0
  -3  -2   2   14.29    2.18   0
  -2 -21  -2  173.29    3.01   0
  -2 -20  -2   -2.66    2.54   0
  -2 -14  -2   53.55    2.21   0
   0 -25  -3    4.67    2.48   0
   0 -10  -3  518.15    4.89   0
   1 -21  -4    9.70    2.47   0
   1 -13  -4  207.55    3.11   0
   1   8   6  318.36    3.62   0
   1   9   8  182.35    3.25   0
   1   9  12   24.88    2.84   0
   2   4   1  324.68    3.85   0
   3 -19  -5   -1.00    2.33   0
   3 -18  -5   72.60    3.02   0
   3 -17  -5   48.41    2.67   0
   3 -16  -5   16.86    2.32   0
   3   6   2    5.09    2.09   0
   3   7   3 1071.30    5.69   0
   3  10   9   -2.92    2.49   0
   3  10  10   29.64    2.60   0
   3  10  11   20.49    2.44   0
   4 -23  -5    1.10    2.73   0
   4   0  -2 2995.31   11.01   0
   4   2  -1    5.38    1.44   0
   4  10   8   37.35    2.06   0
   4  10  11  100.71    2.59   0
   5  -5  -4 1074.72    8.56   0
   5  -2  -3   11.16    1.65   0
   5   4   0   54.06    1.80   0
   5   9   5   22.52    2.27   0
   5  10   8   60.58    2.10   0
   6  -9  -5   60.83    3.37   0
   6   9   5   10.83    2.14   0
   6  10   8    1.01    2.46   0
   6  10   9   -5.25    1.92   0
   7   4   0  856.38    4.32   0
   7   8   4  196.70    2.41   0
   8  -9  -5   40.86    2.83   0
   8  -2  -3  419.44    3.72   0
   8   4   0  892.46    4.68   0
   8   5   1   26.05    1.76   0
   8   7   3   46.81    1.75   0
   8   9   7   70.59    2.28   0
   9 -10  -5  110.90    3.18   0
   9   0  -2   -0.91    2.21   0
   9   8   6   12.41    2.04   0
  10 -12  -5    1.52    2.70   0
  10  -1  -2    9.57    1.81   0
  10   1  -1  136.03    3.01   0
  10   4   1   32.29    2.50   0
  10   5   2   19.36    2.58   0
  10   6   3   37.89    2.43   0
  10   7   5   44.76    2.15   0
  11  -8  -4   52.09    2.70   0
  11  -2  -2   12.97    2.41   0
  11   0  -1   -1.12    2.38   0
  11   3   1   21.09    2.47   0
  11   4   2   15.89    2.84   0
  11   5   3   -0.77    2.42   0
  12   0   0   35.93    2.24   0
  -8 -15   8    3.23    2.55   0
  -8 -14   8  101.07    2.61   0
  -8 -12   9   -3.06    2.80   0
  -8 -11   9    2.57    1.97   0
  -8 -10  10    0.90    2.40   0
  -8  -9  11   -1.73    2.02   0
  -7 -20   5   -1.84    2.15   0
  -7 -19   5   47.56    2.68   0
  -7 -18   5   17.77    2.79   0
  -7 -16   5    0.06    2.60   0
  -7 -15   5  177.29    2.96   0
  -7 -14   5  124.79    2.60   0
  -7 -10   6    6.25    2.10   0
  -7  -8   7    2.15    2.27   0
  -7  -6   8   17.75    1.78   0
  -7  -5   9    1.44    1.94   0
  -7  -4  12   -3.96    2.37   0
  -6 -21   3    3.67    2.06   0
  -6 -20   3    2.59    1.97   0
  -6 -19   3    3.85    2.47   0
  -6 -18   3  203.14    3.26   0
  -6 -17   3   14.70    2.47   0
  -6 -16   3   19.31    2.42   0
  -6 -15   3  158.58    2.78   0
  -6 -14   3    3.92    1.72   0
  -6  -9   4  163.16    2.43   0
  -6  -1  11  124.68    3.70   0
  -6  -1  13   80.24    3.51   0
  -5 -23   2    7.73    2.91   0
  -5 -10   2   18.01    1.68   0
  -4 -19   0   16.82    1.88   0
  -4 -18   0    5.83    1.64   0
  -4 -17   0   40.66    1.80   0
  -4 -16   0   36.41    1.81   0
  -4 -15   0    1.10    1.63   0
  -4  -3   3  356.95    4.06   0
  -3 -20  -1   19.72    1.89   0
  -3 -19  -1  147.59    2.66   0
  -3 -18  -1   58.78    2.46   0
  -3 -17  -1   36.13    2.65   0
  -3 -16  -1  200.62    3.08   0
  -3 -15  -1  142.53    2.79   0
  -3 -14  -1   68.52    1.86   0
  -3  -8   0   85.51    2.56   0
  -3   4   7    5.86    3.91   0
  -2 -19  -2   32.59    1.85   0
  -2 -18  -2    6.22    1.71   0
  -2 -17  -2   56.76    2.38   0
  -2 -16  -2   21.30    1.76   0
  -2 -15  -2   32.27    1.78   0
  -2  -8  -1  182.42    3.15   0
  -2   5   6  312.55    9.16   0
  -1 -25  -2    0.88    2.87   0
   0 -24  -3   23.07    2.12   0
   1 -20  -4    0.37    2.13   0
   1 -19  -4   92.31    2.86   0
   1 -15  -4  209.83    3.47   0
   1 -14  -4  136.34    2.64   0
   1  -7  -3   56.11    2.97   0
   2 -24  -4   16.12    2.83   0
   2  10  10   25.82    2.23   0
   3   8   4   40.36    1.75   0
   3  10   8   57.14    1.96   0
   4 -22  -5   43.50    3.08   0
   4 -12  -5  356.55    7.76   0
   4   4   0    2.41    2.08   0
   4   9   5    2.83    1.53   0
   4  10   7  328.37    3.12   0
   5  10   7   15.95    1.93   0
   6   1  -2  179.82    2.98   0
   6   3  -1   22.63    2.04   0
   6   7   2   99.98    2.30   0
   6   8   3   10.71    1.95   0
   6  10   7  123.91    2.42   0
   7   1  -2   17.99    2.04   0
   7   3  -1 1508.74    5.93   0
   7   7   2   91.57    2.36   0
   7   9   5   97.60    2.30   0
   7  10   7    0.05    2.18   0
   7  10   8    0.51    1.97   0
   8   8   4    0.10    1.87   0
   8   9   6   14.24    1.76   0
   9  -5  -4   -0.71    2.16   0
   9  -2  -3   19.16    2.23   0
   9   2  -1   24.46    1.73   0
   9   5   1  208.82    2.52   0
   9   6   2  208.19    2.66   0
   9   7   3   26.48    2.54   0
   9   8   5   32.96    2.03   0
  10 -11  -5    1.98    2.59   0
  10  -6  -4   -0.97    2.34   0
  10  -3  -3   84.05    2.31   0
  10   3   0  135.93    2.41   0
  10   7   4    3.41    2.65   0
  11  -4  -3   47.98    2.73   0
  11   2   0   22.30    1.94   0
  12  -6  -3    7.12    2.06   0
  12  -3  -2   37.03    2.86   0
  12  -1  -1    5.46    2.06   0
  12   1   0    2.72    2.53   0
  12   2   1   34.92    2.22   0
  -8 -14   9   -8.00    2.97   0
  -8 -13   9    3.19    2.10   0
  -8 -12  10   21.68    3.00   0
  -8 -11  10   29.64    2.20   0
  -8 -10  11   -0.44    2.17   0
  -7 -12   6   18.64    2.54   0
  -7 -11   6   47.96    1.87   0
  -7  -9   7   16.03    2.32   0
  -7  -7   8    2.49    2.19   0
  -7  -6   9   26.56    2.71   0
  -7  -5  10  239.29    3.48   0
  -6 -10   4    2.15    1.65   0
  -6  -7   5   -2.32    1.58   0
  -6  -5   6  221.85    2.76   0
  -6  -2   9  152.45    3.30   0
  -6  -1  12    2.40    2.34   0
  -5 -22   2   34.64    2.64   0
  -5 -12   2  103.80    2.51   0
  -5 -11   2    3.87    1.48   0
  -5  -7   3  958.65    4.77   0
  -5  -3   5    4.29    2.07   0
  -5   1   9    6.40    2.40   0
  -4 -24   1    3.94    2.50   0
  -4  -9   1  149.61    2.31   0
  -4   0   5   -0.73    2.09   0
  -4   2   7  207.84    4.57   0
  -3 -25   0   12.06    2.63   0
  -2 -25  -1    1.36    2.95   0
  -2  -2   1  387.90    5.24   0
  -2   3   4   11.44    4.19   0
  -1 -24  -2   -3.45    2.86   0
  -1  -9  -2   10.46    1.68   0
  -1   7   7  540.93    6.08   0
  -1   8  11    2.37    2.73   0
   0 -23  -3    4.42    1.98   0
   0 -22  -3    1.54    2.55   0
   0 -11  -3  729.16    5.45   0
   0   8   7    5.66    2.08   0
   1 -18  -4  106.97    2.41   0
   1 -17  -4   10.32    2.31   0
   1 -16  -4   59.64    2.12   0
   2 -10  -4    1.63    2.19   0
   2   9   6   71.51    1.90   0
   2  10   9   24.21    1.95   0
   2  10  11  135.48    2.88   0
   2  10  12    3.85    2.44   0
   3   5   1  234.39    3.02   0
   3   9   5   58.00    2.22   0
   3  10   7    3.23    2.25   0
   4 -21  -5    6.06    2.91   0
   4  10   6   17.93    2.34   0
   5   1  -2    3.64    2.22   0
   5   3  -1 1082.84    5.78   0
   5   6   1  212.04    2.91   0
   5   7   2  870.76    4.49   0
   5   8   3   63.26    1.84   0
   5   9   4    9.19    2.19   0
   5  10   6  101.46    2.15   0
   6  -1  -3  168.10    3.12   0
   6   6   1  366.84    3.11   0
   6   9   4   32.00    2.60   0
   6  10   6   23.58    1.90   0
   7  -4  -4  297.31    3.75   0
   7  -1  -3  176.95    2.93   0
   7   6   1  148.11    2.24   0
   7   8   3   10.31    1.60   0
   7  10   6   61.62    2.42   0
   8  -4  -4   31.75    2.37   0
   8  -1  -3    2.97    2.09   0
   8   1  -2  200.58    2.62   0
   8   3  -1  219.45    2.65   0
   8   6   1   20.53    2.17   0
   8   7   2   66.48    2.39   0
   8   9   5   22.10    1.83   0
   8  10   7   50.66    2.52   0
   9  -9  -5   12.09    2.43   0
   9   4   0   13.27    1.66   0
   9   8   4   45.97    2.05   0
   9   9   6   28.89    2.08   0
  10   0  -2   37.96    2.54   0
  10   2  -1   -1.12    2.50   0
  10   6   2  128.57    2.65   0
  10   8   5   -1.86    2.72   0
  11  -7  -4   38.27    2.86   0
  11  -1  -2   36.85    2.71   0
  11   1  -1    4.80    2.36   0
  11   4   1   96.40    2.97   0
  11   5   2   76.09    2.90   0
  11   6   3   -2.37    2.41   0
  12  -5  -3   14.06    2.77   0
  -7 -19   6   16.01    2.86   0
  -7 -18   6   -0.30    2.73   0
  -7 -15   6   45.08    2.79   0
  -7 -14   6    2.83    2.52   0
  -7 -13   6   39.10    2.07   0
  -7 -10   7  473.40    4.05   0
  -7  -8   8  286.18    3.62   0
  -7  -5  11   77.73    2.95   0
  -7  -5  12   42.72    2.68   0
  -6 -22   4   13.58    2.16   0
  -6 -21   4   39.05    2.86   0
  -6 -12   4   73.46    2.57   0
  -6 -11   4   10.82    1.66   0
  -6  -8   5  165.06    2.85   0
  -6  -4   7 1154.46    6.11   0
  -6  -3   8  174.90    3.22   0
  -5 -21   2    5.80    1.84   0
  -5 -20   2    5.07    1.98   0
  -5 -19   2    2.70    2.57   0
  -5 -18   2   26.56    2.62   0
  -5 -14   2   72.35    2.47   0
  -5 -13   2  623.89    3.93   0
  -5  -8   3  346.35    3.30   0
  -5  -5   4 1079.04    5.52   0
  -4 -23   1    7.98    2.19   0
  -4 -22   1   29.41    2.64   0
  -4 -10   1   91.96    1.91   0
  -4  -6   2  133.14    2.35   0
  -4   1   6    1.91    1.98   0
  -3 -24   0   10.95    2.06   0
  -3  -9   0    9.06    1.52   0
  -3  -5   1  334.81    3.44   0
  -3   1   4    0.32    2.32   0
  -2 -24  -1    1.35    2.52   0
  -2  -9  -1  209.20    3.13   0
  -2   0   2 5976.28   21.77   0
  -1 -23  -2    8.03    2.68   0
  -1  -5  -1  124.29    2.89   0
  -1  -2   0  729.19    7.84   0
  -1   8  10   92.28    3.21   0
  -1   8  12   38.56    3.48   0
   0 -21  -3   12.22    2.53   0
   0 -12  -3   40.02    2.28   0
   0   6   4  476.91    5.53   0
   0   9  10  109.61    3.33   0
   0   9  11   13.75    2.50   0
   1   6   3   96.69    2.41   0
   1   7   4  281.88    3.66   0
   1   9   7  104.99    2.41   0
   2 -23  -4    1.78    2.42   0
   2  -5  -3   47.58    5.69   0
   2   7   3 1869.43    7.93   0
   2  10   8  101.31    2.39   0
   4  -2  -3    7.85    2.13   0
   4   7   2   54.17    1.83   0
   4   8   3  132.21    2.19   0
   4   9   4    3.21    1.95   0
   4  11   9   18.45    2.59   0
   4  11  10   18.89    2.89   0
   4  11  11    6.00    2.54   0
   5  11   8    5.25    2.48   0
   5  11   9   68.59    2.41   0
   5  11  10   61.38    2.39   0
   6  -4  -4    4.90    2.02   0
   6   5   0   85.64    1.81   0
   6  10   5  107.80    2.45   0
   6  11   8    0.02    2.56   0
   6  11   9   35.64    2.88   0
   7  -8  -5    4.04    2.08   0
   7   5   0   50.82    1.68   0
   7   9   4   17.04    1.66   0
   8  -8  -5    4.90    2.18   0
   8   5   0   51.21    2.34   0
   8   8   3    3.32    1.75   0
   8   9   4   19.14    2.48   0
   8  10   6   12.14    2.55   0
   9  -4  -4  230.57    3.22   0
   9  -1  -3   57.72    2.31   0
   9   1  -2   38.91    1.83   0
   9   3  -1    5.18    2.15   0
   9   6   1   89.18    2.35   0
   9   7   2   62.50    2.75   0
   9   9   5    1.37    2.02   0
  10 -10  -5   22.09    2.58   0
  10  -5  -4   37.11    2.60   0
  10  -2  -3   -0.92    1.84   0
  10   4   0   -3.94    2.47   0
  10   5   1   80.42    2.12   0
  10   7   3   86.77    2.26   0
  10   8   4   35.43    2.37   0
  11  -6  -4   -3.37    2.31   0
  11  -3  -3   14.19    2.55   0
  11   3   0   21.25    1.88   0
  12  -2  -2    3.30    1.92   0
  12   0  -1   -0.78    1.98   0
  12   2   0   11.77    2.70   0
  12   3   1    8.30    2.08   0
  -7 -17   6    6.28    2.01   0
  -7 -16   6   -1.99    1.78   0
  -7 -11   7  321.30    3.72   0
  -7  -7   9  142.33    2.90   0
  -7  -6  10    0.14    1.87   0
  -7  -6  11   27.54    2.75   0
  -6 -20   4   60.84    2.18   0
  -6 -19   4    6.16    1.97   0
  -6 -18   4    4.16    2.55   0
  -6 -17   4   61.22    2.73   0
  -6 -16   4    1.13    2.48   0
  -6 -15   4   -1.98    2.02   0
  -6 -14   4   42.40    2.45   0
  -6 -13   4   35.82    1.79   0
  -6  -9   5   61.05    2.57   0
  -6  -6   6   62.32    1.85   0
  -6  -2  10    5.37    2.54   0
  -5 -23   3   -3.92    2.81   0
  -5 -17   2  314.81    3.04   0
  -5 -16   2    1.16    1.67   0
  -5 -15   2   42.54    1.88   0
  -5  -9   3   19.32    2.25   0
  -5  -2   6   13.79    2.07   0
  -5   0   8  123.03    3.34   0
  -5   1  10  339.42    5.16   0
  -5   1  13    0.54    3.39   0
  -4 -21   1   -0.03    2.40   0
  -4 -12   1    0.62    2.02   0
  -4 -11   1  746.55    4.15   0
  -4  -4   3  632.98    4.80   0
  -3 -23   0   -1.00    2.02   0
  -3 -22   0   31.58    2.70   0
  -3 -10   0   12.88    2.03   0
  -2 -23  -1   19.99    2.08   0
  -2  -5   0 1437.68    7.36   0
  -2   7  11    6.82    3.38   0
  -1 -22  -2    6.55    2.50   0
  -1 -10  -2  336.70    3.58   0
  -1   8   9   10.45    2.94   0
   0 -20  -3   60.81    2.67   0
   0 -19  -3   49.46    2.69   0
   0 -13  -3   69.27    2.56   0
   0  -6  -2   57.09    2.59   0
   0   2   1    0.36    3.51   0
   0   5   3   14.54    2.26   0
   0   7   5  248.36    4.03   0
   0   9   9   28.98    2.48   0
   0   9  12   51.43    3.19   0
   1 -25  -3    3.19    2.19   0
   1   8   5  182.07    3.34   0
   1  10  10    4.83    2.28   0
   1  10  11   -0.03    2.27   0
   2 -22  -4   49.90    2.74   0
   2   6   2  412.45    4.14   0
   2   8   4   59.90    2.04   0
   2  10   7   59.05    2.41   0
   3   2  -1  433.24    4.46   0
   3  10   6   13.01    2.28   0
   3  11   9    4.83    2.30   0
   3  11  10    1.10    2.66   0
   3  11  11   14.53    2.49   0
   4 -20  -5   10.11    2.54   0
   4   6   1   59.47    1.94   0
   4  11   8   56.85    2.17   0
   5  -1  -3   40.32    2.54   0
   5   5   0   26.97    1.65   0
   5  10   5    3.47    1.70   0
   5  11   7   91.46    2.78   0
   6  11   7   24.77    1.89   0
   7   2  -2   37.02    2.12   0
   7   4  -1   20.32    2.00   0
   7   8   2   97.60    2.38   0
   7  10   5    9.84    1.77   0
   7  11   7   10.67    2.38   0
   7  11   8   29.09    2.21   0
   8   2  -2    8.83    2.19   0
   8  10   5  159.64    2.81   0
   9  -8  -5    2.94    2.42   0
   9   5   0  331.72    3.39   0
   9   8   3  129.72    2.29   0
   9   9   4    1.22    2.20   0
   9  10   6   -1.01    2.43   0
  10  -9  -5    8.78    2.40   0
  10   1  -2    4.86    2.43   0
  10   3  -1   53.14    2.45   0
  11 -11  -5   91.35    3.31   0
  11   0  -2   -1.46    1.90   0
  11   2  -1   60.25    2.68   0
  11   5   1   64.94    2.57   0
  11   6   2   53.18    2.73   0
  12  -4  -3   20.51    2.09   0
  12  -1  -2    3.42    2.18   0
  12   1  -1    3.75    2.47   0
  12   4   1   11.37    2.41   0
  -7 -19   7   -2.43    2.07   0
  -7 -18   7    7.98    2.88   0
  -7 -17   7    1.25    2.81   0
  -7 -16   7   -5.26    2.68   0
  -7 -15   7   28.08    2.64   0
  -7 -14   7  145.37    3.21   0
  -7 -13   7   47.57    2.39   0
  -7 -12   7   -0.11    1.88   0
  -7 -10   8   10.07    2.58   0
  -7  -9   8   84.54    2.31   0
  -7  -8   9   -7.84    2.62   0
  -7  -7  10   49.71    2.76   0
  -7  -6  12   16.51    2.51   0
  -6 -10   5   14.35    2.32   0
  -6  -7   6  489.40    3.97   0
  -6  -5   7  201.00    3.30   0
  -6  -3   9  203.31    3.43   0
  -6  -2  11   75.57    2.86   0
  -6  -2  12    4.43    3.01   0
  -6  -2  13   98.62    3.61   0
  -5 -22   3   -1.56    2.38   0
  -5 -10   3  362.07    3.35   0
  -5  -6   4  854.50    4.71   0
  -5  -4   5    2.16    2.00   0
  -5  -1   7  106.82    2.81   0
  -4 -24   2    2.73    2.78   0
  -4 -20   1   20.18    1.96   0
  -4 -19   1   86.55    2.33   0
  -4 -18   1   69.30    2.47   0
  -4 -17   1   71.09    2.53   0
  -4 -16   1  232.32    3.11   0
  -4 -15   1  122.11    2.75   0
  -4 -14   1    4.44    1.94   0
  -4 -13   1   27.94    1.65   0
  -4  -7   2    3.22    1.44   0
  -4  -2   4    0.70    1.62   0
  -4   3   9  459.27    6.98   0
  -3 -21   0    2.81    1.82   0
  -3 -11   0    7.10    1.95   0
  -3  -6   1    0.86    1.91   0
  -3  -3   2 1142.95    6.78   0
  -2 -22  -1   -2.62    1.93   0
  -2 -21  -1    9.67    2.68   0
  -2 -10  -1 4927.97   11.68   0
  -2   7  10    0.61    2.98   0
  -2   7  12   15.92    3.94   0
  -1 -21  -2   35.44    2.14   0
  -1 -20  -2    3.96    2.32   0
  -1 -11  -2  107.68    2.83   0
  -1   8  13   -0.87    3.27   0
   0 -18  -3    1.53    2.09   0
   0 -17  -3  165.93    3.12   0
   0 -16  -3   60.00    2.47   0
   0 -15  -3  283.09    3.45   0
   0 -14  -3    2.66    1.96   0
   0   9  13    9.60    3.49   0
   1 -24  -3   31.44    2.62   0
   1   5   2  596.22    5.49   0
   1  10   9  445.57    4.60   0
   1  10  12   17.51    2.89   0
   2 -21  -4    2.38    2.19   0
   2 -11  -4  204.42    3.90   0
   2   1  -1 2284.82   12.31   0
   2   3   0    0.90    1.72   0
   2   9   5  331.49    3.75   0
   3 -24  -4    1.87    2.83   0
   3   4   0  343.68    3.65   0
   3   7   2 1607.32    7.06   0
   3   8   3    1.37    1.55   0
   3   9   4  415.21    3.70   0
   3  11   8    2.53    2.45   0
   4 -19  -5   26.84    2.56   0
   4 -18  -5   -1.83    2.92   0
   4 -13  -5   35.76    3.20   0
   4   1  -2 1730.82    8.11   0
   4   3  -1   61.67    2.08   0
   4  10   5  678.71    4.30   0
   4  11   7    5.40    1.66   0
   5 -22  -5   -0.88    2.72   0
   5   8   2  312.14    3.29   0
   5   9   3    1.88    1.96   0
   5  11   6   34.17    2.39   0
   6  -8  -5  160.19    4.20   0
   6   2  -2  186.21    2.65   0
   6   4  -1    0.54    1.31   0
   6   7   1  167.84    2.30   0
   6   8   2   29.48    1.70   0
   6   9   3   31.35    1.83   0
   6  10   4  106.84    2.57   0
   6  11   6   -5.70    2.54   0
   7  -3  -4   69.56    2.39   0
   7   0  -3   -0.12    1.90   0
   7   7   1  145.61    2.25   0
   7   9   3   75.64    2.02   0
   7  10   4  118.52    2.42   0
   7  11   6    1.52    2.50   0
   8  -7  -5  132.40    3.49   0
   8  -3  -4   79.91    2.61   0
   8   0  -3   -1.13    2.06   0
   8   4  -1   25.74    1.73   0
   8   7   1  167.31    2.90   0
   8   8   2   31.02    1.72   0
   8   9   3   -2.68    2.37   0
   8  11   7   72.25    3.01   0
   9   2  -2   95.64    2.48   0
   9   4  -1  179.14    2.77   0
   9  10   5    7.30    2.47   0
  10  -4  -4  187.82    3.36   0
  10  -1  -3    2.52    1.81   0
  10   5   0   -0.33    2.14   0
  10   6   1    4.04    1.86   0
  10   7   2    1.33    1.73   0
  10   8   3   16.20    1.87   0
  11 -10  -5   90.49    3.15   0
  11  -5  -4    7.78    2.59   0
  11  -2  -3   36.39    2.07   0
  11   4   0    4.35    1.77   0
  11   7   3    4.23    2.03   0
  12  -7  -4   54.33    2.53   0
  12  -3  -3   44.41    2.67   0
  12   3   0   46.14    2.86   0
  -7 -12   8   17.30    2.55   0
  -7 -11   8   12.21    2.15   0
  -7  -9   9  157.12    3.19   0
  -7  -8  10   18.09    2.59   0
  -7  -7  11   -6.12    2.41   0
  -7  -7  12    5.06    2.88   0
  -6 -21   5   15.95    2.03   0
  -6 -20   5   -2.93    2.58   0
  -6 -11   5   18.15    2.11   0
  -6  -4   8  110.54    2.43   0
  -5 -21   3    0.14    1.91   0
  -5 -20   3   17.41    2.38   0
  -5 -11   3   65.67    2.19   0
  -5  -7   4   -1.79    1.93   0
  -5   1  11   13.66    2.66   0
  -5   1  12   -1.26    2.77   0
  -4 -23   2   11.46    2.83   0
  -4  -8   2  316.70    3.41   0
  -3 -25   1   -3.67    2.06   0
  -3 -20   0   29.02    1.99   0
  -3 -19   0    9.05    1.57   0
  -3 -18   0   13.63    2.32   0
  -3 -13   0  550.50    4.05   0
  -3 -12   0  342.47    3.00   0
  -3  -1   3   81.52    2.40   0
  -3   2   5 1306.97   11.07   0
  -2 -25   0   14.10    2.88   0
  -2 -20  -1   20.01    1.84   0
  -2 -19  -1    3.74    2.13   0
  -2 -11  -1 3137.36    9.08   0
  -1 -25  -1    8.48    2.91   0
  -1 -19  -2   45.76    2.33   0
  -1 -18  -2   74.16    2.57   0
  -1 -12  -2    4.05    1.87   0
   0 -25  -2    3.46    2.08   0
   0   8   6   16.23    2.24   0
   0   9   8  230.09    3.98   0
   1 -23  -3   64.49    2.79   0
   1  -8  -3   18.86    2.40   0
   1   9   6  342.53    3.99   0
   1  10   8   22.27    2.66   0
   2 -20  -4  105.88    3.00   0
   2 -19  -4  124.90    3.18   0
   2  11   9    1.34    2.36   0
   2  11  10   55.08    2.91   0
   2  11  11    1.94    2.34   0
   3  -3  -3   66.66    3.25   0
   3   0  -2    4.90    1.97   0
   3  10   5   13.48    2.05   0
   3  11   7    6.71    2.22   0
   4 -17  -5   97.04    3.54   0
   4 -14  -5  128.65    4.19   0
   4   5   0   44.98    1.85   0
   4  11   6   21.94    2.35   0
   5  -4  -4   11.60    2.08   0
   5   2  -2   30.97    2.35   0
   5   4  -1  333.08    3.53   0
   5   7   1   18.17    1.39   0
   5  10   4   -3.36    1.64   0
   5  12   9   41.95    2.98   0
   5  12  10   68.18    3.26   0
   6  -3  -4    0.66    1.78   0
   6   0  -3   -3.53    2.17   0
   6   6   0    9.82    2.12   0
   6  12   8   11.68    2.59   0
   6  12   9    8.09    2.89   0
   7  -7  -5   34.83    2.55   0
   7   6   0  336.73    2.99   0
   8   6   0   17.69    1.68   0
   8  10   4    7.59    1.79   0
   8  11   6   11.20    2.07   0
   9  -7  -5   56.78    2.74   0
   9  -3  -4   49.65    1.93   0
   9   0  -3   -0.22    1.61   0
   9   7   1   60.40    2.11   0
   9   8   2  100.98    2.35   0
   9   9   3   32.99    2.69   0
  10  -8  -5   30.94    2.61   0
  10   2  -2   -1.48    2.47   0
  10   9   4   -0.60    2.02   0
  11   1  -2   44.60    2.06   0
  11   3  -1    9.79    2.48   0
  11   6   1    3.40    2.38   0
  11   7   2   82.13    2.95   0
  12  -6  -4    3.16    2.93   0
  12   0  -2  175.35    3.29   0
  12   2  -1   24.99    2.91   0
  -7 -17   8    0.22    2.14   0
  -7 -16   8   -0.52    2.42   0
  -7 -15   8   11.48    2.41   0
  -7 -14   8   14.84    2.44   0
  -7 -13   8   24.66    1.88   0
  -7 -11   9  158.93    3.22   0
  -7 -10   9   14.86    1.90   0
  -7  -9  10   66.56    3.02   0
  -7  -8  11   10.04    2.38   0
  -7  -8  12   16.76    2.90   0
  -6 -18   5   69.15    2.20   0
  -6 -16   5   32.99    2.44   0
  -6 -15   5  134.41    2.91   0
  -6 -14   5    6.39    1.96   0
  -6 -13   5   48.95    1.87   0
  -6 -12   5    5.89    1.56   0
  -6  -8   6   31.10    1.82   0
  -6  -6   7    4.77    1.74   0
  -6  -3  10   43.63    2.70   0
  -5 -19   3   15.48    1.94   0
  -5 -18   3   -0.34    1.89   0
  -5 -17   3   33.69    2.09   0
  -5 -16   3   46.66    2.41   0
  -5 -15   3   37.13    2.47   0
  -5 -14   3  204.98    3.01   0
  -5 -13   3   17.84    1.71   0
  -5 -12   3    0.67    1.52   0
  -5  -5   5  270.72    3.30   0
  -5  -3   6  257.52    3.42   0
  -5   0   9    0.66    2.59   0
  -4 -22   2   16.70    1.93   0
  -4  -9   2  124.75    2.57   0
  -4  -5   3   20.15    2.18   0
  -3 -24   1   70.65    2.40   0
  -3 -17   0  171.94    2.77   0
  -3 -16   0   97.43    2.19   0
  -3 -15   0  216.30    2.65   0
  -3 -14   0  205.89    2.52   0
  -3  -7   1    9.11    2.17   0
  -3   3   6    3.09    2.99   0
  -2 -24   0   13.10    2.95   0
  -2 -18  -1  103.63    2.29   0
  -2 -17  -1    5.72    2.16   0
  -2 -16  -1   -0.92    2.20   0
  -2 -15  -1  250.78    3.18   0
  -2 -14  -1  572.94    4.08   0
  -2 -13  -1   64.61    2.23   0
  -2 -12  -1  110.85    2.08   0
  -2  -6   0 1606.50    7.48   0
  -1 -24  -1  103.26    3.12   0
  -1 -17  -2   81.65    2.14   0
  -1 -16  -2   -1.29    1.92   0
  -1 -15  -2  384.58    3.70   0
  -1 -14  -2  222.28    3.01   0
  -1 -13  -2 1145.32    5.61   0
  -1  -6  -1 1324.24    7.72   0
  -1   8   8   23.91    2.86   0
   0 -24  -2   44.24    2.42   0
   1 -22  -3    9.58    2.60   0
   2 -18  -4    1.34    2.14   0
   2 -12  -4    2.56    2.01   0
   2   5   1   16.57    1.74   0
   2  10   6   51.95    1.84   0
   2  11   8   41.43    2.32   0
   2  11  12    9.30    2.91   0
   3 -23  -4   -2.53    2.36   0
   3   6   1    2.01    1.53   0
   4 -16  -5  107.36    3.39   0
   4 -15  -5   10.99    2.61   0
   4   8   2  267.51    2.91   0
   4   9   3   69.53    1.90   0
   4  10   4   -2.57    2.07   0
   4  12   8   71.95    2.62   0
   4  12   9   25.97    2.08   0
   4  12  10   39.48    2.25   0
   5 -21  -5    0.46    2.68   0
   5   6   0    6.99    1.81   0
   5  11   5   27.73    2.32   0
   5  12   7   27.27    2.29   0
   5  12   8   63.17    2.22   0
   6  11   5    3.00    1.55   0
   6  12   7   23.54    2.69   0
   7   3  -2   17.17    2.10   0
   7   5  -1   69.28    2.20   0
   7   9   2    1.44    2.11   0
   7  11   5    3.91    1.77   0
   7  12   7   12.70    2.91   0
   7  12   8    4.65    2.11   0
   8  -2  -4   11.98    2.08   0
   8   3  -2  105.03    2.62   0
   8   5  -1   66.52    2.30   0
   8  11   5   69.32    2.72   0
   9   6   0    7.26    1.60   0
   9  10   4    1.51    1.81   0
  10  -7  -5    8.63    2.20   0
  10  -3  -4    9.97    2.53   0
  10   0  -3    2.63    2.45   0
  10   4  -1   37.76    1.96   0
  10   8   2  197.88    2.74   0
  10   9   3  112.54    3.21   0
  11  -9  -5    6.98    2.65   0
  11  -4  -4   35.00    2.13   0
  11  -1  -3   -0.70    1.72   0
  11   5   0   68.94    2.76   0
  11   8   3   -2.59    2.00   0
  12  -5  -4   14.74    2.59   0
  12  -2  -3    9.05    2.63   0
  12   4   0   -0.07    2.02   0
  -7 -16   9    5.25    2.89   0
  -7 -15   9   22.65    3.05   0
  -7 -14   9   20.65    2.99   0
  -7 -13   9   37.92    3.00   0
  -7 -12   9    5.28    2.00   0
  -7 -11  10    5.33    2.71   0
  -7 -10  10    5.75    2.39   0
  -7  -9  11   23.57    2.56   0
  -7  -9  12   10.02    2.90   0
  -6 -21   6    4.07    2.09   0
  -6 -20   6   29.74    2.62   0
  -6 -10   6    2.11    2.54   0
  -6  -9   6  121.18    2.24   0
  -6  -7   7   72.27    2.63   0
  -6  -5   8   46.07    2.16   0
  -6  -4   9   69.69    2.57   0
  -6  -3  11  106.01    3.04   0
  -6  -3  12   14.25    2.84   0
  -6  -3  13   10.39    2.50   0
  -5 -22   4   28.10    2.13   0
  -5 -21   4  154.89    3.34   0
  -5  -8   4  274.16    2.85   0
  -5  -2   7  785.42    5.44   0
  -5  -1   8  808.42    6.13   0
  -4 -24   3   -1.51    2.80   0
  -4 -21   2  143.86    2.63   0
  -4 -20   2    3.12    2.21   0
  -4 -10   2    3.04    1.83   0
  -4  -3   4  760.07    5.56   0
  -4  -1   5  147.14    2.93   0
  -4   3  13   27.92    4.25   0
  -3 -23   1   53.85    2.21   0
  -3 -22   1    2.96    2.57   0
  -2 -23   0    3.83    2.53   0
  -2  -3   1   -1.04    2.64   0
  -1 -23  -1   49.92    2.84   0
  -1   0   1    2.70    3.67   0
  -1   6   5    3.17    2.31   0
   0 -23  -2   10.41    2.04   0
   0  -7  -2   20.68    2.15   0
   1 -21  -3   53.38    2.79   0
   2 -25  -3   -3.87    2.04   0
   2 -17  -4   15.94    2.07   0
   2 -16  -4  180.46    3.44   0
   2 -15  -4  105.13    2.88   0
   2 -14  -4   88.28    2.73   0
   2 -13  -4  205.83    3.65   0
   3 -22  -4   -0.08    2.62   0
   3  11   6    9.30    2.24   0
   3  12   9    2.94    2.21   0
   3  12  10   18.70    2.82   0
   3  12  11    9.37    2.55   0
   4   7   1  202.87    2.62   0
   4  11   5  116.94    2.70   0
   4  12   7  199.27    3.23   0
   5 -20  -5    1.89    2.77   0
   6   3  -2   19.90    2.05   0
   6   5  -1   81.58    2.28   0
   6   8   1   28.09    2.01   0
   6   9   2    0.22    1.57   0
   6  10   3  161.96    2.37   0
   6  12   6   17.06    2.48   0
   7  -2  -4   25.53    2.10   0
   7   1  -3  184.01    2.86   0
   7   8   1   29.34    1.78   0
   7  10   3    0.34    1.57   0
   7  11   4    1.91    2.31   0
   7  12   6   93.50    2.92   0
   8  -6  -5  186.90    3.51   0
   8   1  -3    8.14    1.66   0
   8   8   1   53.10    1.90   0
   8   9   2   12.58    1.60   0
   8  10   3  237.06    2.85   0
   8  12   7    3.02    2.16   0
   9  -6  -5    7.13    2.36   0
   9  -2  -4   15.32    2.26   0
   9   1  -3   63.49    2.52   0
   9   3  -2    6.13    1.61   0
   9   5  -1  118.17    2.22   0
   9   8   1  130.74    2.76   0
   9   9   2   68.54    2.70   0
   9  11   5   -1.48    2.05   0
  10   3  -2   51.24    2.38   0
  10   6   0  136.77    2.46   0
  10  10   4    6.94    2.18   0
  11  -8  -5   17.70    2.68   0
  11  -3  -4   14.06    2.24   0
  11   0  -3   -1.30    2.27   0
  11   2  -2   16.34    1.83   0
  11   4  -1   12.31    2.53   0
  11   8   2   -1.39    2.43   0
  12   1  -2    1.48    1.93   0
  12   3  -1    1.49    2.09   0
  -7 -14  10    3.11    2.86   0
  -7 -13  10   13.94    2.58   0
  -7 -12  10   -4.73    2.12   0
  -7 -12  11   -6.19    2.91   0
  -7 -11  11   27.04    3.02   0
  -7 -10  11   19.32    2.22   0
  -6 -19   6   -0.06    2.21   0
  -6 -18   6    0.07    1.94   0
  -6 -17   6   73.26    2.97   0
  -6 -16   6   -1.68    2.57   0
  -6 -13   6   97.89    2.64   0
  -6 -12   6    5.86    2.23   0
  -6 -11   6   48.06    1.97   0
  -6  -8   7   45.18    2.78   0
  -6  -6   8    5.24    2.40   0
  -6  -4  10   65.28    2.99   0
  -5 -20   4    8.91    1.73   0
  -5 -19   4    6.14    2.56   0
  -5 -10   4    1.87    2.02   0
  -5  -9   4  389.99    3.19   0
  -5  -6   5   16.08    2.16   0
  -4 -23   3    7.28    2.77   0
  -4 -19   2    8.64    1.86   0
  -4 -18   2    9.58    2.06   0
  -4 -17   2  182.01    3.03   0
  -4 -12   2   86.58    2.38   0
  -4 -11   2   95.93    2.30   0
  -4  -6   3   92.74    2.59   0
  -4   2   8   98.30    3.60   0
  -4   3  10   71.38    3.81   0
  -3 -25   2   12.86    2.55   0
  -3 -21   1   56.75    2.34   0
  -3  -8   1   35.45    1.73   0
  -3  -4   2   66.78    2.07   0
  -2 -22   0   44.14    2.65   0
  -2  -7   0  739.47    5.15   0
  -2   6   7  390.16    9.28   0
  -2   7   9   -0.06    3.30   0
  -2   7  13   50.76    5.08   0
  -1 -22  -1   56.76    2.80   0
  -1   5   4  134.52    4.78   0
   0 -22  -2   81.82    2.37   0
   0   4   2 2853.10   15.47   0
   0   9   7  198.70    3.61   0
   1 -20  -3   16.65    2.69   0
   1  -9  -3   60.20    2.80   0
   1   2   0  678.15    7.88   0
   1   4   1 9999.99   23.46   0
   1   8   4  248.03    3.66   0
   1  10   7  925.47    5.90   0
   2 -24  -3    1.79    2.68   0
   2   8   3  932.96    5.72   0
   2   9   4   91.76    2.62   0
   2  11   7    3.74    2.19   0
   3 -21  -4   54.68    3.01   0
   3   9   3    4.34    1.96   0
   3  12   8   45.81    2.84   0
   4 -24  -4    2.08    2.73   0
   4  -5  -4  177.17    5.03   0
   4  -1  -3    7.28    2.13   0
   4   4  -1   61.15    2.54   0
   5  -9  -5    4.67    3.96   0
   5   0  -3   -0.20    1.55   0
   5   9   2   27.84    1.63   0
   5  10   3  109.34    2.15   0
   5  11   4   33.44    2.22   0
   5  12   6   47.75    2.05   0
   5  13   9   39.49    2.57   0
   6  -7  -5    2.93    2.26   0
   6   7   0  646.69    4.15   0
   6  11   4   -1.46    1.63   0
   6  13   8   14.36    2.43   0
   7   7   0  297.86    2.82   0
   7  12   5   11.21    2.24   0
   8   7   0   77.13    1.94   0
   8  11   4    1.65    1.77   0
   8  12   6    8.62    1.94   0
   9   7   0  215.94    2.90   0
   9  10   3    1.85    1.94   0
   9  11   4   -2.06    2.59   0
  10  -2  -4   -2.56    1.78   0
  10   1  -3   -0.13    2.46   0
  10   5  -1    0.23    1.80   0
  10   8   1   17.80    2.19   0
  10   9   2   -1.79    2.58   0
  11  -7  -5    1.65    2.68   0
  11   6   0   97.40    2.89   0
  11   7   1    0.01    1.82   0
  12  -4  -4   26.86    2.98   0
  12  -1  -3   -0.34    2.04   0
  12   5   0    5.05    2.03   0
  -6 -20   7    5.26    2.15   0
  -6 -19   7   42.64    3.08   0
  -6 -15   6   -1.90    1.86   0
  -6 -14   6   53.12    2.02   0
  -6  -9   7   -2.71    2.29   0
  -6  -7   8  554.05    4.45   0
  -6  -5   9  221.18    3.08   0
  -6  -4  11   82.26    3.10   0
  -6  -4  12    5.95    2.67   0
  -6  -4  13   22.36    2.96   0
  -5 -22   5   -3.34    2.21   0
  -5 -18   4   18.35    1.98   0
  -5 -17   4  126.37    2.88   0
  -5 -16   4   49.46    2.36   0
  -5 -12   4  207.78    3.05   0
  -5 -11   4   10.86    1.98   0
  -5  -4   6   26.62    1.66   0
  -5   0  10   80.30    3.13   0
  -5   0  13   -2.54    2.86   0
  -4 -22   3    4.20    2.00   0
  -4 -16   2   16.47    1.96   0
  -4 -15   2    3.59    1.62   0
  -4 -14   2   14.30    1.68   0
  -4 -13   2   42.77    1.71   0
  -4   0   6   42.71    2.49   0
  -4   1   7   25.48    2.88   0
  -3 -24   2   -3.72    2.57   0
  -3 -20   1   -1.00    1.90   0
  -3 -19   1  136.38    2.78   0
  -3  -9   1   63.97    2.44   0
  -2 -25   1    3.38    2.50   0
  -2 -21   0   21.64    2.37   0
  -1 -21  -1   87.12    2.91   0
  -1  -7  -1 3322.36   11.22   0
  -1   7   6   77.76    2.99   0
   0 -21  -2   19.52    1.96   0
   0  -3  -1   60.46    3.87   0
   0  10  10   14.95    2.95   0
   0  10  11   25.35    2.88   0
   0  10  12   31.71    3.54   0
   1 -25  -2    3.10    2.20   0
   1 -19  -3   59.93    2.69   0
   1   7   3  923.22    6.35   0
   1   9   5  649.05    5.07   0
   1  11   9   26.93    2.44   0
   1  11  10   -0.43    2.39   0
   1  11  11   26.02    2.86   0
   1  11  12    8.00    3.27   0
   2 -23  -3   45.90    3.07   0
   2   7   2 1880.35    8.12   0
   2  10   5  525.14    4.36   0
   3   3  -1   81.12    2.17   0
   3   5   0  420.33    3.88   0
   3   8   2    6.10    2.11   0
   3  10   4   87.91    2.00   0
   3  12   7   54.57    2.38   0
   4   2  -2   19.71    2.27   0
   4   6   0  305.33    3.49   0
   4  12   6   -1.55    2.20   0
   4  13   9   25.69    2.53   0
   4  13  10    2.22    2.59   0
   5 -19  -5   17.79    2.92   0
   5   3  -2   51.84    2.58   0
   5   5  -1  389.54    3.78   0
   5   8   1   82.62    1.90   0
   5  13   8   18.55    2.01   0
   6  -2  -4  200.87    3.33   0
   6   1  -3  165.23    2.62   0
   6  12   5  254.22    2.94   0
   6  13   7   13.43    2.54   0
   7   4  -2 1559.89    6.15   0
   7   6  -1  128.56    2.63   0
   7  10   2   -1.91    2.31   0
   7  13   7    4.09    2.82   0
   8  -5  -5   79.62    2.97   0
   8  -1  -4   12.78    2.27   0
   8   2  -3  398.39    3.77   0
   8   4  -2  246.35    2.76   0
   8   6  -1    5.10    2.10   0
   8  10   2   24.74    2.46   0
   8  12   5   17.24    2.09   0
   9  -5  -5    3.00    2.04   0
   9  -1  -4   89.28    2.63   0
   9   2  -3   17.82    2.14   0
   9   4  -2   87.42    2.07   0
   9   6  -1  158.21    2.77   0
   9  12   5    7.38    2.46   0
  10   7   0   32.07    1.95   0
  10  10   3  274.91    3.07   0
  10  11   4    8.76    2.83   0
  11  -2  -4   -4.30    2.58   0
  11   1  -3    3.92    2.49   0
  11   3  -2   10.18    1.86   0
  11   5  -1   59.67    2.74   0
  12  -3  -4    3.58    2.52   0
  12   0  -3    0.60    2.66   0
  12   2  -2   -1.51    1.92   0
  12   4  -1   29.18    2.15   0
  -6 -18   7    5.99    2.13   0
  -6 -17   7   -4.74    2.20   0
  -6 -16   7   57.58    2.69   0
  -6 -12   7   90.36    2.62   0
  -6 -11   7   -2.63    2.27   0
  -6 -10   7   32.34    1.83   0
  -6  -8   8   19.96    2.33   0
  -6  -6   9    8.78    2.47   0
  -6  -5  10    4.39    2.67   0
  -5 -21   5   -2.13    2.02   0
  -5 -20   5   -6.53    2.65   0
  -5 -15   4    7.88    1.69   0
  -5 -14   4  137.62    2.37   0
  -5 -13   4   42.22    1.78   0
  -5  -7   5   80.33    2.01   0
  -5  -3   7   75.50    2.57   0
  -5  -1   9    0.35    2.36   0
  -5   0  11   -0.44    2.58   0
  -5   0  12  159.81    3.94   0
  -4 -21   3   10.90    1.89   0
  -4 -20   3   13.13    2.51   0
  -4  -7   3   -1.32    1.40   0
  -4  -4   4 1239.95    6.62   0
  -4   3  11   13.67    3.33   0
  -4   3  12    1.15    3.01   0
  -3 -23   2    2.17    2.00   0
  -3 -18   1   59.93    2.01   0
  -3 -17   1   54.93    2.49   0
  -3 -10   1   24.90    1.56   0
  -3  -5   2   43.16    2.29   0
  -3  -2   3 2818.06   11.11   0
  -3   0   4   31.74    2.68   0
  -2 -24   1    0.28    2.90   0
  -2 -20   0   46.76    2.04   0
  -2  -8   0   97.48    2.27   0
  -1 -25   0    1.74    2.06   0
  -1 -20  -1   11.56    2.25   0
  -1  -3   0 4255.95   16.50   0
  -1   9  11   89.39    3.69   0
   0 -25  -1   -2.13    2.08   0
   0 -20  -2  121.60    2.51   0
   0  -8  -2  442.05    4.85   0
   0  10   9  136.25    3.35   0
   1 -24  -2   -3.07    2.57   0
   1 -18  -3  125.02    2.85   0
   1 -17  -3   11.16    2.20   0
   1 -10  -3   43.85    2.54   0
   2  12   9  245.17    3.77   0
   2  12  10    2.65    2.02   0
   2  12  11   10.37    2.78   0
   3 -20  -4   35.75    2.55   0
   3  -8  -4 1019.02   13.42   0
   3  11   5    6.87    1.81   0
   4 -23  -4    1.72    2.42   0
   4   9   2   30.07    1.54   0
   4  10   3  321.93    3.05   0
   4  11   4   79.11    2.65   0
   4  13   8    3.11    2.57   0
   5  -3  -4    0.65    2.01   0
   5   7   0  738.27    4.62   0
   5  12   5   -0.88    1.67   0
   5  13   7   18.42    1.95   0
   6 -21  -5    8.71    3.14   0
   6   4  -2   -0.12    1.95   0
   6   6  -1  443.03    3.57   0
   6   9   1  126.10    2.51   0
   6  10   2   24.96    1.68   0
   6  11   3   73.17    2.74   0
   6  13   6   71.09    2.74   0
   7  -1  -4    3.13    1.90   0
   7   2  -3    2.75    2.10   0
   7   9   1   74.44    1.94   0
   7  11   3   23.34    1.70   0
   7  12   4  197.71    3.12   0
   7  13   6   68.82    2.94   0
   8   8   0   50.99    2.46   0
   8   9   1   -0.21    1.59   0
   8  11   3   33.17    1.95   0
   8  12   4    6.83    2.45   0
   8  13   6   -0.95    2.93   0
   9   8   0  315.12    3.44   0
   9   9   1  134.90    2.51   0
   9  10   2   -0.52    1.82   0
   9  11   3   67.81    2.74   0
  10  -5  -5   56.46    2.79   0
  10  -1  -4   52.55    2.23   0
  10   2  -3    1.36    2.46   0
  10   4  -2   82.04    2.29   0
  10   6  -1   -3.31    2.35   0
  11  -6  -5   43.86    2.30   0
  11   7   0   34.01    2.77   0
  11   8   1    2.63    1.99   0
  11   9   2   21.76    2.15   0
  12   3  -2   33.98    2.55   0
  12   6   0    5.92    2.03   0
  -6 -19   8    6.13    2.15   0
  -6 -18   8    6.49    2.81   0
  -6 -15   7    5.44    1.86   0
  -6 -14   7   -1.61    1.86   0
  -6 -13   7   17.85    2.06   0
  -6  -9   8   70.93    2.63   0
  -6  -7   9  157.54    2.92   0
  -6  -6  10    1.57    2.52   0
  -6  -5  11    2.06    2.26   0
  -6  -5  12   -3.75    2.86   0
  -6  -5  13   38.50    2.91   0
  -5 -22   6    4.78    2.09   0
  -5 -19   5   24.06    1.90   0
  -5 -18   5   58.45    2.73   0
  -5  -9   5    4.21    2.06   0
  -5  -8   5   38.31    1.76   0
  -5  -5   6  141.62    2.37   0
  -5  -2   8   13.46    2.30   0
  -4 -19   3   53.50    2.61   0
  -4  -8   3   70.31    1.95   0
  -4  -2   5   20.63    1.80   0
  -3 -22   2   14.29    1.92   0
  -3 -16   1    0.67    1.68   0
  -3 -15   1  518.62    3.66   0
  -3 -14   1    9.64    1.97   0
  -3 -13   1   31.68    2.22   0
  -3 -12   1   66.40    1.81   0
  -3 -11   1   -2.68    1.40   0
  -2 -23   1    2.29    2.54   0
  -2 -19   0   40.33    1.73   0
  -2 -18   0    6.60    2.39   0
  -2  -9   0  418.43    4.05   0
  -2  -1   2   97.45    3.52   0
  -1 -24   0   -3.75    1.96   0
  -1 -19  -1    3.37    1.98   0
  -1  -8  -1  408.51    3.96   0
  -1   9  10   29.80    3.21   0
  -1   9  12   10.13    3.17   0
   0 -24  -1   -1.57    2.39   0
   0 -19  -2  188.48    2.72   0
   0 -18  -2   31.79    2.51   0
   0   7   4  111.29    3.27   0
   0   8   5   17.51    2.29   0
   1 -23  -2    3.14    2.55   0
   1 -16  -3   23.59    2.39   0
   1 -15  -3    6.27    2.12   0
   1 -11  -3   90.23    2.88   0
   1   6   2  683.67    5.76   0
   1  10   6  207.56    3.28   0
   1  11   8  157.32    3.26   0
   2  -1  -2   91.35    3.94   0
   2   4   0   64.50    2.29   0
   2  11   6   11.29    1.71   0
   2  12   8   -0.16    2.20   0
   3 -19  -4    6.67    2.51   0
   3   1  -2  378.09    4.65   0
   3   7   1   52.05    1.90   0
   3  12   6  230.02    3.39   0
   3  13   9    6.03    2.29   0
   3  13  10    5.76    2.87   0
   3  13  11   -0.01    2.51   0
   4   8   1    6.00    1.46   0
   4  12   5  127.81    3.05   0
   4  13   7    0.35    2.54   0
   5 -18  -5   56.96    3.32   0
   5  10   2   21.94    2.03   0
   5  11   3    7.91    2.23   0
   5  13   6   68.62    2.81   0
   6  12   4   57.34    1.90   0
   6  14   8    1.42    2.43   0
   7  -5  -5    2.84    2.19   0
   7   8   0  314.83    2.92   0
   7  13   5   15.55    2.51   0
   8  -4  -5  128.67    2.97   0
   8   0  -4    1.38    2.00   0
   8   5  -2   39.77    2.38   0
   8  13   5    2.45    2.41   0
   9  -4  -5  120.71    2.95   0
   9   0  -4  707.55    4.72   0
   9   5  -2   75.76    2.48   0
   9  12   4   24.21    2.10   0
  10  -4  -5   92.62    2.80   0
  10   8   0   58.51    2.75   0
  10   9   1   54.23    1.95   0
  10  10   2   75.69    2.28   0
  10  11   3   22.51    2.20   0
  11  -5  -5    8.10    2.81   0
  11  -1  -4  115.19    2.55   0
  11   2  -3   45.76    2.77   0
  11   4  -2    7.50    1.85   0
  11   6  -1    0.07    2.57   0
  12  -6  -5    1.91    2.57   0
  12  -2  -4    2.75    2.03   0
  12   1  -3    7.61    1.91   0
  12   5  -1    2.03    2.01   0
  -6 -17   8    2.67    2.47   0
  -6 -16   8   -0.28    1.90   0
  -6 -15   8   -3.27    2.25   0
  -6 -14   8   -1.86    2.58   0
  -6 -13   8  115.15    2.98   0
  -6 -12   8    1.23    2.43   0
  -6 -11   8  142.19    3.10   0
  -6 -10   8   27.49    1.65   0
  -6  -8   9    0.74    2.55   0
  -6  -7  10  216.73    3.53   0
  -6  -6  11   74.55    3.15   0
  -6  -6  12   -1.78    2.62   0
  -6  -6  13    6.15    2.99   0
  -5 -20   6    9.85    3.09   0
  -5 -17   5   26.90    2.10   0
  -5 -16   5   48.84    2.63   0
  -5 -15   5   80.59    2.59   0
  -5 -11   5  128.62    2.74   0
  -5 -10   5  226.91    2.89   0
  -5  -6   6    2.46    1.90   0
  -5  -4   7  103.34    2.60   0
  -5  -1  10  343.69    4.47   0
  -4 -22   4    0.19    2.05   0
  -4 -21   4    5.43    2.59   0
  -4 -18   3   21.38    1.60   0
  -4 -17   3   70.76    2.34   0
  -4 -16   3  261.68    3.49   0
  -4 -10   3  283.31    3.10   0
  -4  -9   3  155.41    2.32   0
  -4  -5   4  209.01    3.30   0
  -4   2  14    3.53    3.99   0
  -3 -21   2   29.79    1.96   0
  -3  -6   2  536.80    4.50   0
  -2 -25   2   -4.29    2.84   0
  -2 -22   1   23.10    2.58   0
  -2 -17   0   21.80    1.71   0
  -2 -16   0    3.33    2.32   0
  -2 -10   0  119.93    2.39   0
  -2  -4   1   32.24    2.17   0
  -1 -23   0   10.57    2.27   0
  -1 -18  -1   45.80    2.13   0
  -1 -17  -1  165.63    2.99   0
  -1  -9  -1  515.46    4.57   0
  -1   8   7    0.74    2.51   0
   0 -23  -1   -4.77    2.59   0
   0 -17  -2   40.94    2.49   0
   0  -9  -2  848.53    5.98   0
   0  10   8   18.15    2.49   0
   1 -14  -3  193.20    3.12   0
   1 -13  -3   35.85    2.17   0
   1 -12  -3   25.53    1.69   0
   2 -21  -3    5.66    2.45   0
   2   2  -1  374.59    5.27   0
   2   6   1 1063.56    6.18   0
   3 -24  -3   55.96    3.09   0
   3 -18  -4  201.38    3.60   0
   3  13   8    3.48    2.44   0
   4 -22  -4   -1.42    2.29   0
   4   5  -1   12.42    2.05   0
   5 -17  -5   29.93    3.24   0
   5   1  -3   39.12    1.95   0
   5   9   1   15.23    2.06   0
   5  12   4  177.64    2.67   0
   5  14   8   63.48    2.89   0
   5  14   9    8.27    2.06   0
   6 -20  -5   -1.47    3.30   0
   6  -6  -5   15.65    2.11   0
   6  -1  -4   16.10    1.98   0
   6   2  -3 2543.61    8.24   0
   6   8   0  167.14    2.30   0
   6  13   5   22.21    2.00   0
   7   5  -2   46.53    1.84   0
   7   7  -1  520.09    3.82   0
   7  10   1    1.25    2.16   0
   7  11   2    4.21    2.17   0
   7  12   3    4.08    2.18   0
   7  14   7   -0.79    2.07   0
   8   3  -3    7.95    1.67   0
   8   7  -1   48.10    1.89   0
   8  10   1  144.17    2.63   0
   8  11   2   26.21    1.95   0
   8  12   3   38.73    2.52   0
   9 -14  -6    1.10    4.15   0
   9 -13  -6   30.04    3.99   0
   9 -12  -6    2.23    3.36   0
   9   3  -3   55.50    1.95   0
   9   7  -1   83.19    1.97   0
   9  10   1    6.70    2.47   0
   9  11   2   29.82    2.66   0
   9  12   3   15.14    2.40   0
   9  13   5    0.60    2.01   0
  10 -14  -6   45.46    4.52   0
  10 -13  -6   15.85    3.53   0
  10   0  -4   44.59    2.19   0
  10   3  -3   76.86    2.92   0
  10   5  -2    2.63    1.68   0
  10   7  -1    4.96    2.43   0
  11  -4  -5   -2.14    2.38   0
  11   8   0    6.28    2.79   0
  11   9   1   10.20    2.15   0
  12  -1  -4    1.67    2.47   0
  12   2  -3    6.36    2.42   0
  12   4  -2   31.33    2.84   0
  12   6  -1   -4.84    2.50   0
  -6 -17   9    2.33    2.17   0
  -6 -16   9   25.63    2.54   0
  -6 -15   9    6.99    2.74   0
  -6 -11   9    4.92    2.47   0
  -6 -10   9   23.23    2.74   0
  -6  -9   9   -3.06    2.00   0
  -6  -8  10   12.15    2.60   0
  -6  -7  11    5.22    2.62   0
  -6  -7  12    6.42    3.07   0
  -6  -7  13    6.61    2.62   0
  -5 -21   7    5.82    2.92   0
  -5 -19   6    3.87    1.90   0
  -5 -14   5   -2.51    1.75   0
  -5 -13   5    6.58    1.75   0
  -5 -12   5    2.86    1.61   0
  -5  -7   6   68.82    2.29   0
  -5  -3   8 1042.39    6.17   0
  -5  -2   9  514.33    4.95   0
  -5  -1  11   11.46    2.66   0
  -5  -1  12    2.49    2.61   0
  -5  -1  13    0.31    2.55   0
  -4 -23   5    0.92    2.48   0
  -4 -20   4   44.82    2.72   0
  -4 -15   3  200.76    2.60   0
  -4 -14   3  136.77    2.36   0
  -4 -13   3   -2.70    1.56   0
  -4 -12   3  284.11    2.86   0
  -4 -11   3  516.98    3.68   0
  -4  -3   5  276.57    3.74   0
  -4  -1   6    1.48    2.20   0
  -4   2   9  245.84    4.73   0
  -3 -23   3   -0.14    2.01   0
  -3 -20   2   33.27    2.18   0
  -3 -19   2    6.37    2.13   0
  -3   5  13    5.34    4.75   0
  -2 -21   1    6.11    2.55   0
  -2 -15   0  178.58    2.44   0
  -2 -14   0  122.33    2.27   0
  -2 -13   0  321.79    3.05   0
  -2 -12   0   14.35    1.65   0
  -2 -11   0  123.14    2.25   0
  -2   1   3  918.59    9.78   0
  -1 -22   0   10.11    2.38   0
  -1 -16  -1    3.34    2.03   0
  -1 -15  -1   24.34    2.08   0
  -1 -10  -1   79.63    2.63   0
  -1   9   9   20.06    3.06   0
   0 -26   0    9.40    2.15   0
   0 -22  -1    7.38    2.57   0
   0 -16  -2   23.96    1.68   0
   0 -15  -2   13.33    1.99   0
   0 -11  -2  177.81    3.25   0
   0 -10  -2    8.28    1.75   0
   0   9   6  470.98    5.07   0
   1 -22  -2    2.64    1.81   0
   1  -4  -2 1403.77   15.07   0
   1  11   7    2.68    2.30   0
   2 -25  -2   11.81    2.52   0
   2   9   3 2426.33    8.69   0
   2  10   4   -2.10    1.99   0
   2  12   7   99.78    2.79   0
   3 -17  -4    1.85    2.61   0
   3   9   2  285.35    3.31   0
   3  10   3  168.95    2.48   0
   3  11   4   47.42    2.20   0
   4 -21  -4    9.27    2.99   0
   4   0  -3   -1.72    2.29   0
   4   7   0   37.66    2.31   0
   4  11   3  550.39    3.91   0
   4  13   6    0.63    1.56   0
   4  14   9   98.54    3.35   0
   4  14  10    4.57    3.00   0
   5   4  -2    2.85    2.01   0
   5   6  -1  236.05    2.76   0
   5  13   5    3.17    1.60   0
   5  14   7   38.58    2.59   0
   6   5  -2  197.19    2.83   0
   6  10   1  646.69    4.20   0
   6  11   2   64.93    2.40   0
   6  12   3   91.97    2.53   0
   6  14   6    0.62    2.55   0
   7  -4  -5   24.20    2.15   0
   7   0  -4  412.85    3.67   0
   7   3  -3  181.55    2.44   0
   7   9   0   -0.83    2.15   0
   7  13   4   -3.43    2.44   0
   7  14   6   62.52    2.43   0
   8   9   0  381.35    3.21   0
   8  13   4   36.19    2.03   0
   8  14   6   21.11    2.26   0
   9 -15  -6   18.32    5.62   0
   9 -11  -6   12.53    2.94   0
   9  -3  -5  176.17    3.30   0
   9   1  -4   98.01    2.67   0
   9   6  -2   97.43    2.43   0
   9   9   0   83.38    2.25   0
   9  13   4   92.19    3.10   0
  10 -12  -6   44.76    3.33   0
  10 -11  -6   12.25    3.14   0
  10  -3  -5  108.05    3.03   0
  10  10   1  339.42    3.24   0
  10  11   2    6.61    1.93   0
  10  12   3    0.62    2.83   0
  11   0  -4   26.93    1.92   0
  11   3  -3   12.52    2.56   0
  11   5  -2   11.04    1.84   0
  11   7  -1   26.76    2.72   0
  12  -5  -5    8.00    2.23   0
  -6 -16  10   -0.15    2.08   0
  -6 -15  10    4.28    2.86   0
  -6 -14   9    0.95    1.79   0
  -6 -14  10    8.01    2.86   0
  -6 -13   9    0.51    1.94   0
  -6 -12   9   16.62    1.95   0
  -6 -11  10   66.35    2.94   0
  -6 -10  10   -1.08    2.65   0
  -6  -9  10   58.41    2.18   0
  -6  -9  11   14.79    2.78   0
  -6  -8  11   17.96    2.50   0
  -6  -8  12   58.76    2.70   0
  -5 -20   7    0.26    2.61   0
  -5 -18   6   19.81    2.01   0
  -5 -17   6   17.13    2.34   0
  -5 -16   6   -0.80    2.63   0
  -5  -8   6  219.78    3.00   0
  -5  -5   7   81.46    2.39   0
  -4 -22   5   45.83    2.31   0
  -4 -19   4    0.07    1.87   0
  -4  -6   4    3.05    1.58   0
  -3 -24   4   -5.92    2.80   0
  -3 -22   3   46.27    2.22   0
  -3 -18   2    5.00    1.83   0
  -3  -7   2  247.11    3.02   0
  -3  -3   3   66.65    2.00   0
  -2 -24   2   11.91    2.06   0
  -2 -20   1    6.64    2.42   0
  -2  -5   1    6.74    2.27   0
  -1 -25   1   10.63    2.08   0
  -1 -21   0    3.53    2.55   0
  -1 -14  -1   34.01    1.69   0
  -1 -13  -1  747.51    4.61   0
  -1 -12  -1   10.18    1.66   0
  -1 -11  -1  158.05    2.63   0
  -1   9  13   80.16    4.45   0
   0 -25   0   -3.04    2.52   0
   0 -14  -2  100.89    2.25   0
   0 -13  -2    2.42    1.47   0
   0 -12  -2   21.16    1.74   0
   0   6   3  750.97    6.81   0
   1 -25  -1    2.64    2.64   0
   1 -21  -2    0.90    2.51   0
   1  12  10   23.13    2.71   0
   1  12  11    1.88    2.38   0
   2 -24  -2    1.42    2.83   0
   2 -20  -3   11.49    1.99   0
   2   8   2  449.65    4.27   0
   2  11   5  103.62    2.23   0
   2  13  10   41.90    2.70   0
   2  13  11    7.99    2.50   0
   3 -23  -3   11.81    2.57   0
   3  -2  -3 2871.42   15.41   0
   3   4  -1  793.48    5.41   0
   3   6   0  879.19    5.24   0
   3  12   5   23.04    2.39   0
   3  13   7   -2.08    1.63   0
   4   3  -2 1154.25    6.35   0
   4  10   2    0.46    1.47   0
   4  12   4    9.31    1.64   0
   4  14   8   80.35    2.37   0
   5 -23  -4   -0.49    3.01   0
   5 -16  -5   62.60    3.67   0
   5  -2  -4  352.82    4.53   0
   5   8   0   13.83    1.37   0
   5  14   6  297.68    3.48   0
   6   7  -1 1075.43    5.00   0
   6  13   4  173.24    2.54   0
   7  14   5    2.28    2.56   0
   8  -3  -5    1.37    1.59   0
   8   1  -4   15.85    1.80   0
   8   4  -3   39.93    2.32   0
   8   6  -2   16.03    1.60   0
   8   8  -1  156.29    2.95   0
   8  14   5   27.58    2.95   0
   9 -10  -6    6.00    2.96   0
   9   4  -3   28.03    1.80   0
   9   8  -1   11.01    2.37   0
  10 -10  -6    1.82    2.61   0
  10   1  -4   61.35    2.30   0
  10   4  -3    0.40    2.41   0
  10   6  -2   38.13    1.99   0
  10   8  -1   26.55    2.38   0
  11  -3  -5   63.44    2.94   0
  11   1  -4  112.83    3.02   0
  11   9   0   -2.71    2.57   0
  11  10   1   51.21    2.34   0
  12  -4  -5    5.85    2.98   0
  12   0  -4   58.39    3.09   0
  12   5  -2   29.54    2.13   0
  12   7  -1   43.03    2.99   0
  -6 -14  11   -1.85    2.17   0
  -6 -13  10   97.29    2.50   0
  -6 -13  11    5.00    2.57   0
  -6 -12  10    3.70    2.07   0
  -6 -12  11   -2.51    2.48   0
  -6 -11  11   -3.82    2.66   0
  -6 -11  12    9.82    3.02   0
  -6 -10  11   44.32    2.28   0
  -6 -10  12   11.01    2.57   0
  -6  -9  12   11.41    2.20   0
  -5 -20   8    9.76    2.99   0
  -5 -19   7   -4.12    2.18   0
  -5 -18   7   80.24    2.91   0
  -5 -15   6    9.15    1.94   0
  -5 -14   6   37.77    2.19   0
  -5 -13   6   -2.22    2.30   0
  -5 -12   6   23.11    2.55   0
  -5 -11   6    2.33    2.32   0
  -5 -10   6   12.70    2.21   0
  -5  -9   6   45.97    2.01   0
  -5  -6   7  293.08    3.45   0
  -5  -4   8    5.69    2.31   0
  -5  -3   9  174.29    3.57   0
  -5  -2  10    0.67    2.38   0
  -5  -2  13   -1.84    2.96   0
  -4 -21   5    0.20    2.02   0
  -4 -18   4   50.59    2.05   0
  -4 -17   4  158.61    2.85   0
  -4  -7   4  251.99    2.96   0
  -4   0   7   -0.05    1.91   0
  -4   1   8   10.44    2.27   0
  -4   2  13   66.26    4.13   0
  -3 -21   3   -4.93    1.93   0
  -3 -17   2  167.91    2.60   0
  -3 -16   2    6.26    2.05   0
  -3  -8   2  673.37    4.40   0
  -3   1   5   35.84    2.71   0
  -2 -25   3   -0.08    2.81   0
  -2 -23   2    1.29    1.84   0
  -2 -19   1   74.15    2.39   0
  -1 -24   1   85.63    2.43   0
  -1 -20   0   -4.60    2.19   0
  -1  -4   0 3108.44   13.01   0
   0 -24   0   34.89    2.80   0
   0 -21  -1    0.83    1.96   0
   0  10   7    1.70    2.24   0
   0  11  10   59.04    3.28   0
   0  11  11   -1.41    2.86   0
   1 -24  -1   91.45    3.06   0
   1 -20  -2   12.40    2.49   0
   1   8   3  164.04    3.34   0
   1   9   4  109.08    2.49   0
   1  10   5  176.77    3.24   0
   1  12   9    0.21    2.50   0
   1  12  12   23.21    3.03   0
   2 -19  -3  136.85    2.98   0
   2  12   6    0.11    2.21   0
   2  13   9   10.14    2.35   0
   3 -16  -4   56.35    2.70   0
   3   8   1  247.72    3.41   0
   3  13   6   59.03    2.43   0
   3  14   9   39.38    2.49   0
   3  14  10   83.90    3.17   0
   4 -20  -4   38.15    2.74   0
   4  -4  -4 1178.23   10.92   0
   4   9   1  463.55    3.62   0
   4  13   5    6.66    1.60   0
   4  14   7  114.44    2.51   0
   5   2  -3   11.10    2.28   0
   5  10   1  160.80    2.73   0
   5  11   2   33.98    1.73   0
   5  12   3    2.73    1.63   0
   5  13   4    4.88    2.33   0
   6 -19  -5   69.34    3.85   0
   6  -5  -5   22.64    2.30   0
   6   0  -4    4.95    1.84   0
   6   3  -3   58.68    1.88   0
   6   9   0    5.38    1.44   0
   6  14   5   78.58    2.30   0
   6  15   7    0.31    2.64   0
   6  15   8    3.51    2.12   0
   7   1  -4    3.58    1.87   0
   7   4  -3  260.61    3.05   0
   7   6  -2   45.64    1.78   0
   7   8  -1    7.57    1.60   0
   7  11   1   55.73    2.48   0
   7  12   2   99.81    2.07   0
   7  13   3   37.73    2.67   0
   8 -12  -6   -0.87    3.49   0
   8 -11  -6   51.25    4.15   0
   8  10   0   27.77    2.10   0
   8  11   1   11.74    1.77   0
   8  13   3    1.98    1.81   0
   9  -9  -6   10.29    2.88   0
   9  -2  -5   14.24    2.34   0
   9   2  -4   15.81    2.14   0
   9  10   0    5.00    2.47   0
   9  11   1  199.03    2.67   0
   9  12   2   41.67    1.96   0
   9  13   3   45.22    2.30   0
  10  -9  -6    0.81    2.67   0
  10  -2  -5   85.98    3.14   0
  10   2  -4   -0.62    2.31   0
  10  11   1    3.57    2.68   0
  10  12   2   26.94    2.82   0
  11 -10  -6   15.70    3.04   0
  11  -2  -5   12.29    2.43   0
  11   4  -3   37.34    2.00   0
  11   6  -2   55.71    2.16   0
  11   8  -1    9.45    2.86   0
  12   1  -4    8.64    2.44   0
  -5 -19   8   20.57    2.60   0
  -5 -17   7   59.17    2.18   0
  -5 -16   7   -1.31    2.55   0
  -5  -7   7    3.50    2.29   0
  -5  -5   8   20.34    2.32   0
  -5  -2  11   84.47    3.01   0
  -5  -2  12    5.91    2.64   0
  -4 -22   6    9.83    2.16   0
  -4 -20   5    3.51    1.97   0
  -4 -19   5   35.03    2.57   0
  -4 -16   4   59.22    2.06   0
  -4 -15   4    0.16    2.12   0
  -4 -14   4   64.92    2.50   0
  -4  -9   4  433.39    3.64   0
  -4  -8   4  292.57    3.04   0
  -4  -4   5  195.84    2.92   0
  -4  -2   6   75.84    2.68   0
  -4   2  10    2.34    2.56   0
  -3 -20   3   33.10    2.10   0
  -3 -15   2   51.90    1.91   0
  -3 -14   2  102.06    2.03   0
  -3 -13   2   36.57    2.25   0
  -3 -12   2  378.04    3.48   0
  -3 -11   2   35.23    2.09   0
  -3 -10   2   57.29    1.82   0
  -3  -9   2  251.21    2.91   0
  -3  -4   3  964.13    6.01   0
  -3  -1   4    0.48    1.67   0
  -2 -22   2   21.85    2.04   0
  -2 -18   1   64.79    2.16   0
  -2  -6   1   11.75    2.26   0
  -1 -23   1   17.88    2.32   0
  -1 -19   0   27.04    2.35   0
  -1   9   8   90.92    3.52   0
   0 -20  -1  143.08    2.42   0
   0  11  12   95.02    3.91   0
   1   0  -1    1.30    3.42   0
   1   5   1  126.71    3.40   0
   1  11   6  432.07    4.34   0
   1  12   8   31.16    2.47   0
   2 -23  -2    0.92    2.66   0
   2 -18  -3    4.07    2.27   0
   2  13   8   15.78    2.64   0
   3 -22  -3   54.20    2.77   0
   3 -15  -4   26.24    2.56   0
   3 -14  -4  102.76    3.34   0
   3  -9  -4   74.71    3.72   0
   3  14   8  101.75    2.91   0
   4 -24  -3   -2.54    3.02   0
   4   6  -1   32.83    2.30   0
   4  14   6   48.29    2.56   0
   5 -22  -4   25.79    2.87   0
   5 -15  -5   84.55    3.63   0
   5  -8  -5   35.81    4.83   0
   5   5  -2  314.64    3.47   0
   5   7  -1  586.47    3.97   0
   5  14   5    3.71    2.68   0
   5  15   7    2.90    2.33   0
   5  15   8   29.79    2.09   0
   6   6  -2  443.69    3.58   0
   6   8  -1    3.70    1.98   0
   6  11   1  582.71    3.98   0
   6  12   2   66.32    2.70   0
   6  13   3   12.02    2.21   0
   6  15   6   18.69    2.35   0
   7  -3  -5    1.81    2.03   0
   7  10   0   71.33    2.55   0
   7  14   4  228.90    2.92   0
   7  15   6    1.35    2.05   0
   8 -10  -6    8.85    3.42   0
   8  -2  -5  234.97    3.53   0
   8   2  -4   12.96    2.15   0
   8   7  -2   11.91    2.21   0
   8  14   4   15.01    2.02   0
   9  -8  -6    1.24    2.69   0
   9   5  -3    1.42    2.24   0
   9   7  -2   72.99    1.98   0
   9   9  -1   59.32    2.74   0
   9  14   4   36.54    2.21   0
  10  -8  -6  114.78    3.59   0
  10  -1  -5   -0.17    2.33   0
  10   5  -3   59.86    2.82   0
  10   7  -2   59.86    2.03   0
  10   9  -1   91.56    2.78   0
  10  10   0   67.41    2.11   0
  11  -9  -6   -0.79    2.92   0
  11  -8  -6    8.17    2.57   0
  11   2  -4   -7.28    2.68   0
  11  10   0    9.18    2.74   0
  11  11   1   -0.46    2.06   0
  12   4  -3   28.60    2.18   0
  12   6  -2    8.66    2.05   0
  -5 -18   8   35.87    2.32   0
  -5 -17   8    7.38    2.69   0
  -5 -15   7   37.78    2.07   0
  -5 -14   7   14.80    2.45   0
  -5 -13   7   -1.79    2.25   0
  -5 -10   7    2.72    2.53   0
  -5  -9   7   18.91    2.32   0
  -5  -8   7  136.83    2.45   0
  -5  -4   9    6.91    2.57   0
  -5  -3  10  251.02    3.78   0
  -5  -3  13   13.83    2.75   0
  -4 -21   6    1.63    2.05   0
  -4 -18   5    1.27    2.49   0
  -4 -13   4  259.55    2.81   0
  -4 -12   4  192.85    2.59   0
  -4 -11   4    4.09    1.55   0
  -4 -10   4   11.50    1.62   0
  -4  -5   5   20.99    2.36   0
  -4   1  14    5.23    3.72   0
  -4   2  11  264.73    5.12   0
  -4   2  12   22.41    3.14   0
  -3 -22   4    1.29    1.90   0
  -3 -19   3   18.68    1.82   0
  -3 -18   3   73.77    2.56   0
  -3   5  10  102.43    5.64   0
  -2 -24   3   -1.30    1.97   0
  -2 -21   2   15.38    1.76   0
  -2 -17   1   50.42    1.90   0
  -2 -16   1   26.90    2.37   0
  -2  -2   2   98.02    3.30   0
  -1 -25   2    2.62    2.12   0
  -1 -22   1   34.96    2.62   0
  -1 -18   0  175.82    3.17   0
  -1   4   3  383.62    8.84   0
   0 -23   0   -0.64    1.91   0
   0 -19  -1    4.79    2.12   0
   0  -4  -1 2534.89   14.41   0
   0  11   9  215.71    4.02   0
   1 -23  -1    8.76    2.40   0
   1 -19  -2   15.32    1.73   0
   2 -17  -3   16.70    2.59   0
   2   5   0 1334.90    7.29   0
   2   7   1  789.64    5.36   0
   2  13   7  133.95    2.91   0
   3 -25  -2   10.97    2.61   0
   3 -21  -3    2.87    2.47   0
   3 -13  -4   69.59    3.01   0
   3 -10  -4  112.94    3.87   0
   3   2  -2   15.43    1.78   0
   3  11   3   40.49    1.69   0
   3  12   4  496.28    4.00   0
   4 -19  -4    1.71    2.37   0
   4   8   0  120.39    2.20   0
   4  11   2    6.14    2.14   0
   4  12   3   -0.29    2.12   0
   4  13   4   19.51    2.06   0
   4  15   8   17.80    2.45   0
   4  15   9   15.80    2.26   0
   5 -14  -5   -1.41    3.00   0
   5  -1  -4    6.82    2.14   0
   5   9   0  205.40    2.57   0
   6  14   4   22.10    1.99   0
   7 -20  -5    0.57    3.36   0
   7   7  -2  321.57    3.25   0
   7  15   5   10.97    2.03   0
   8  -9  -6   24.34    3.03   0
   8   5  -3  105.68    2.18   0
   8   9  -1   31.82    1.88   0
   8  12   1  105.94    3.03   0
   8  13   2   28.72    2.47   0
   8  14   3   40.76    2.45   0
   8  15   5   57.55    2.46   0
   9  -7  -6   30.54    2.94   0
   9  -1  -5   69.12    2.16   0
   9   3  -4   43.71    2.25   0
   9  12   1   -0.12    2.49   0
   9  13   2   30.77    2.17   0
   9  14   3    3.54    2.55   0
  10  -7  -6   48.02    2.93   0
  10   3  -4    2.59    2.49   0
  10  12   1   16.97    2.89   0
  10  13   2   42.22    3.00   0
  11  -7  -6   22.89    2.46   0
  11  -1  -5    2.87    2.64   0
  11   5  -3   21.35    1.93   0
  11   7  -2   -3.54    1.96   0
  11   9  -1   40.84    2.89   0
  12  -2  -5   26.22    2.23   0
  12   2  -4    7.69    2.87   0
  12   7  -2   25.58    2.56   0
  -5 -18   9   11.66    2.22   0
  -5 -17   9   33.96    3.02   0
  -5 -16   8    2.12    1.97   0
  -5 -15   8   20.86    2.80   0
  -5 -12   7   25.10    1.84   0
  -5 -11   7  156.76    2.46   0
  -5  -7   8    3.26    2.44   0
  -5  -6   8    6.70    1.81   0
  -5  -5   9   11.93    2.41   0
  -5  -4  10   32.49    2.64   0
  -5  -3  11   42.58    2.63   0
  -5  -3  12   19.25    2.56   0
  -4 -21   7    0.80    3.10   0
  -4 -20   6   10.95    2.07   0
  -4 -19   6   16.65    2.65   0
  -4 -17   5   93.62    2.24   0
  -4 -16   5  118.08    2.76   0
  -4  -6   5  210.96    3.19   0
  -4  -1   7   27.87    2.37   0
  -4   1   9   43.92    3.17   0
  -3 -23   5    0.22    2.19   0
  -3 -21   4   48.82    2.28   0
  -3 -17   3   14.98    2.42   0
  -3  -5   3  145.41    3.13   0
  -3   2   6   19.26    2.89   0
  -3   5  12   46.02    5.00   0
  -2 -23   3   48.03    2.25   0
  -2 -20   2   80.10    2.67   0
  -2 -15   1  205.49    2.57   0
  -2 -14   1  326.47    3.43   0
  -2  -7   1    6.77    1.53   0
  -2   7   8  108.47    6.26   0
  -1 -24   2   -3.83    2.90   0
  -1 -17   0    2.70    2.30   0
  -1  -5   0 1638.15    9.11   0
   0 -25   1   -1.45    2.20   0
   0 -22   0   10.43    2.53   0
   0 -18  -1   60.68    2.44   0
   1 -25   0   12.48    2.96   0
   1 -22  -1   31.85    2.58   0
   1 -18  -2   78.25    2.30   0
   1   3   0 4120.46   16.71   0
   1   7   2  236.42    3.35   0
   1  12   7    9.22    2.20   0
   2 -25  -1   -2.44    2.87   0
   2 -22  -2   22.02    2.11   0
   2 -16  -3   99.54    2.96   0
   2  10   3   70.27    2.64   0
   2  11   4   78.79    2.13   0
   2  12   5  257.92    3.40   0
   3 -12  -4   49.98    2.64   0
   3 -11  -4   29.29    2.42   0
   3   5  -1  321.57    3.81   0
   3   7   0  292.65    3.20   0
   3  10   2  133.71    2.33   0
   3  13   5    7.32    2.31   0
   3  14   7   60.31    2.34   0
   4 -23  -3    9.81    2.63   0
   4   1  -3    7.56    1.71   0
   4   4  -2  493.58    4.14   0
   4  10   1   -1.07    1.89   0
   4  14   5   91.72    2.64   0
   4  15   7    3.82    2.15   0
   5  12   2  323.83    3.08   0
   5  13   3   -0.25    1.66   0
   5  14   4  116.42    2.63   0
   5  15   6   16.53    1.87   0
   6 -18  -5   70.69    3.58   0
   6  -4  -5  502.24    5.48   0
   6   1  -4   15.87    2.09   0
   6   4  -3   23.67    1.67   0
   6  10   0    7.32    1.61   0
   6  15   5   -0.15    1.87   0
   6  16   7   79.30    3.14   0
   7  -2  -5   -0.54    2.03   0
   7   2  -4   26.29    1.59   0
   7   5  -3   -2.99    1.96   0
   7   9  -1   77.16    2.03   0
   7  12   1   15.76    1.70   0
   7  13   2   29.75    1.89   0
   7  16   6   -1.34    2.41   0
   8  -1  -5   -0.36    2.23   0
   8   3  -4   72.33    2.41   0
   8  11   0  133.75    2.13   0
   8  15   4    9.11    2.71   0
   9   6  -3   46.34    2.35   0
   9   8  -2  216.52    2.59   0
   9  11   0   13.92    1.76   0
  10  -6  -6   50.10    2.85   0
  10   0  -5    0.78    2.48   0
  10   6  -3   63.93    2.66   0
  10   8  -2   52.18    1.98   0
  10  11   0    1.28    1.86   0
  11  -6  -6   50.31    2.81   0
  11   0  -5    2.66    2.37   0
  11   3  -4   15.16    1.91   0
  11   6  -3   39.72    2.55   0
  11   8  -2   11.44    2.36   0
  11  11   0    1.52    2.77   0
  12  -1  -5    4.12    2.91   0
  12   5  -3    5.30    2.12   0
  -5 -17  10   -0.92    2.63   0
  -5 -16   9   20.61    2.14   0
  -5 -15   9   31.16    2.62   0
  -5 -14   8   68.35    2.29   0
  -5 -13   8   12.65    2.47   0
  -5 -12   8    1.43    2.42   0
  -5 -11   8   13.60    2.36   0
  -5 -10   8    2.23    2.29   0
  -5  -9   8   35.32    2.53   0
  -5  -8   8   28.11    2.03   0
  -5  -6   9  549.33    4.49   0
  -5  -4  11    4.62    2.59   0
  -5  -4  12   52.46    3.02   0
  -5  -4  13    3.01    2.16   0
  -4 -20   7   13.74    2.95   0
  -4 -18   6   10.75    2.57   0
  -4 -15   5   11.44    1.87   0
  -4 -14   5  130.68    2.92   0
  -4  -7   5   15.94    2.12   0
  -4  -3   6   -1.24    1.47   0
  -4   0   8  188.51    3.51   0
  -3 -22   5   26.65    2.40   0
  -3 -20   4   38.22    2.21   0
  -3 -16   3    4.01    1.65   0
  -3  -6   3  825.68    5.39   0
  -3  -2   4  303.84    4.22   0
  -3   4   8  173.68    5.33   0
  -2 -24   4   11.23    2.62   0
  -2 -22   3   66.09    2.15   0
  -2 -19   2   25.48    2.16   0
  -2 -13   1   27.59    1.53   0
  -2 -12   1   -1.99    1.99   0
  -2 -11   1  825.66    5.06   0
  -2 -10   1 2836.93    8.98   0
  -2  -9   1  482.00    4.20   0
  -2  -8   1  113.54    2.41   0
  -1 -21   1    2.41    1.96   0
  -1 -16   0   56.55    2.26   0
   0 -24   1   -3.41    2.81   0
   0 -17  -1   56.27    2.42   0
   0   5   2 1466.34   10.45   0
   0   8   4  727.93    6.37   0
   0   9   5  319.95    4.39   0
   0  11   8   31.45    2.82   0
   1 -17  -2   13.24    2.15   0
   1  13  10   39.64    2.67   0
   2 -21  -2    7.07    2.60   0
   2  -6  -3   43.63    3.64   0
   2   3  -1    0.01    1.99   0
   2   9   2  132.46    3.21   0
   2  14   9   18.32    2.74   0
   2  14  10    2.34    2.74   0
   2  14  11    6.89    3.15   0
   3 -24  -2    0.84    2.43   0
   3 -20  -3   27.88    2.83   0
   3   9   1   10.91    2.15   0
   3  14   6  129.54    2.80   0
   3  15   9   -0.64    2.40   0
   3  15  10   -3.40    2.99   0
   4 -18  -4   50.85    2.90   0
   5 -21  -4  141.72    3.58   0
   5 -13  -5    0.85    3.14   0
   5   3  -3  551.40    4.27   0
   5   8  -1    0.13    1.88   0
   5  11   1    8.48    1.48   0
   5  15   5   14.02    2.62   0
   6   7  -2  859.30    4.85   0
   6   9  -1  595.65    3.94   0
   6  12   1  109.57    2.64   0
   6  13   2   16.74    1.77   0
   6  14   3   98.02    2.64   0
   6  16   6   58.50    3.14   0
   7  11   0   10.95    1.62   0
   7  15   4   12.49    1.77   0
   8  -8  -6   15.94    2.38   0
   8   6  -3  142.52    2.33   0
   8   8  -2  474.19    3.54   0
   8  10  -1    5.23    2.17   0
   9  -6  -6   -0.53    2.35   0
   9   0  -5   -0.52    1.55   0
   9  10  -1   58.39    2.13   0
   9  13   1   68.10    2.51   0
   9  14   2  224.82    3.34   0
  10  -5  -6   49.38    2.77   0
  10   4  -4  193.37    3.25   0
  10  10  -1   46.80    2.07   0
  10  13   1    0.98    2.53   0
  11  -5  -6    6.31    2.38   0
  11   4  -4   37.06    2.51   0
  12   0  -5   -0.84    2.50   0
  12   3  -4    4.18    2.14   0
  12   6  -3   -3.53    2.90   0
  -5 -16  10    1.28    2.13   0
  -5 -15  10   18.14    2.96   0
  -5 -14   9   10.46    1.92   0
  -5 -13   9    1.81    2.57   0
  -5 -12   9   11.37    2.57   0
  -5  -8   9   68.35    2.65   0
  -5  -7   9   22.01    2.27   0
  -5  -6  10   10.45    2.55   0
  -5  -6  13    0.99    2.97   0
  -5  -5  10   15.68    1.75   0
  -5  -5  11   28.58    2.63   0
  -5  -5  12   35.11    2.98   0
  -5  -5  13   20.37    2.17   0
  -4 -20   8   10.19    2.86   0
  -4 -19   7   22.49    2.39   0
  -4 -17   6   37.74    2.09   0
  -4 -13   5   41.86    1.90   0
  -4 -12   5  366.48    3.52   0
  -4 -11   5   -2.85    2.22   0
  -4 -10   5  303.57    3.29   0
  -4  -9   5  223.93    3.05   0
  -4  -8   5   31.28    1.71   0
  -4  -4   6  158.54    2.96   0
  -4   1  13    9.34    2.98   0
  -3 -23   6   -3.22    2.06   0
  -3 -21   5   14.49    1.96   0
  -3 -19   4    2.28    1.95   0
  -3 -18   4  191.41    3.02   0
  -3 -15   3  238.58    2.73   0
  -3 -14   3    4.76    2.00   0
  -3 -13   3    9.28    2.14   0
  -3  -7   3  505.92    4.31   0
  -3   3   7  207.58    5.18   0
  -3   4  14   13.41    4.22   0
  -3   5  11   29.18    4.51   0
  -2 -23   4    6.49    2.97   0
  -2 -21   3    6.77    2.26   0
  -2 -18   2   31.66    1.86   0
  -1 -25   3   -0.63    2.08   0
  -1 -23   2   -0.37    1.86   0
  -1 -20   1   17.55    1.63   0
  -1 -15   0   91.73    2.16   0
  -1 -14   0 1295.94    5.97   0
  -1  -6   0 4942.58   14.11   0
  -1   7   5  503.73    7.00   0
  -1   8   6  107.91    3.39   0
  -1  10  10    6.31    3.10   0
  -1  10  11   42.70    3.55   0
   0 -21   0    4.23    1.93   0
   0 -16  -1  319.98    3.49   0
   0  10   6   25.03    2.31   0
   1 -24   0    1.47    2.46   0
   1 -21  -1   -2.95    2.34   0
   1 -16  -2   77.31    2.55   0
   1  10   4   70.86    2.66   0
   1  11   5   -0.44    2.20   0
   1  13   9   29.89    2.69   0
   1  13  11   11.11    2.84   0
   2 -24  -1    1.82    2.61   0
   2 -15  -3   11.88    1.62   0
   2  13   6    0.54    1.75   0
   2  14   8   55.48    2.88   0
   3  -1  -3   86.87    3.15   0
   3  15   8    3.03    2.70   0
   4 -22  -3    5.24    2.82   0
   4  -3  -4  734.82    8.14   0
   4   7  -1  174.89    2.65   0
   4   9   0   16.64    2.08   0
   4  13   3   13.26    2.03   0
   4  15   6   19.85    1.88   0
   4  16   9   19.82    2.64   0
   5 -12  -5    4.95    3.23   0
   5   6  -2  559.85    4.05   0
   5  10   0   -1.07    1.57   0
   5  16   7   -5.23    2.04   0
   6 -17  -5   31.15    3.21   0
   6   5  -3  212.92    2.92   0
   6  11   0    2.54    2.28   0
   6  15   4    3.14    1.82   0
   7  -1  -5   90.02    2.57   0
   7   3  -4   77.95    2.31   0
   7   6  -3  176.66    2.78   0
   7   8  -2  290.98    3.05   0
   7  10  -1    7.52    2.28   0
   7  14   2  329.94    3.69   0
   7  16   5   37.13    2.18   0
   8  -7  -6   64.08    3.00   0
   8   0  -5   -0.29    2.19   0
   8  12   0   97.91    2.79   0
   8  13   1   -0.08    1.91   0
   8  14   2   10.99    2.00   0
   8  15   3   42.50    2.24   0
   9  -5  -6    2.55    2.46   0
   9   1  -5   62.18    2.38   0
   9   4  -4  238.74    2.85   0
   9   7  -3    4.58    2.21   0
   9   9  -2    8.31    2.49   0
   9  12   0   30.48    1.94   0
   9  15   3    3.13    2.11   0
  10  -4  -6   76.17    2.69   0
  10   1  -5   -3.39    2.60   0
  10   7  -3   53.47    2.66   0
  10   9  -2   16.38    2.69   0
  10  12   0   11.17    2.08   0
  11  -4  -6   58.64    2.78   0
  11   1  -5    0.88    2.58   0
  11   7  -3   16.00    2.34   0
  11   9  -2    0.46    2.59   0
  12   4  -4   33.50    2.96   0
  -5 -15  11   21.14    2.27   0
  -5 -14  10   66.83    2.36   0
  -5 -14  11   19.72    2.63   0
  -5 -13  10   39.46    2.49   0
  -5 -13  11    4.00    2.82   0
  -5 -12  10    2.50    2.58   0
  -5 -11   9   83.15    2.28   0
  -5 -11  10    4.76    2.46   0
  -5 -10   9  102.85    2.36   0
  -5  -9   9   23.43    1.79   0
  -5  -8  10   14.68    2.73   0
  -5  -8  13   18.33    3.24   0
  -5  -7  10    0.45    2.45   0
  -5  -7  11   -1.41    2.63   0
  -5  -7  12    5.87    2.80   0
  -5  -7  13   17.61    2.67   0
  -5  -6  11  142.61    3.07   0
  -5  -6  12   36.99    2.65   0
  -4 -19   8    9.10    2.90   0
  -4 -18   7   -0.40    1.96   0
  -4 -16   6   35.71    2.01   0
  -4 -15   6   37.75    2.42   0
  -4  -5   6  106.99    2.72   0
  -4  -2   7  202.48    3.36   0
  -4   0  14   15.40    3.17   0
  -4   1  10   32.22    2.74   0
  -4   1  11   42.64    3.30   0
  -4   1  12   47.44    3.33   0
  -3 -22   6   12.75    2.12   0
  -3 -20   5   27.40    2.11   0
  -3 -17   4    6.00    2.39   0
  -3 -12   3   57.70    1.98   0
  -3 -11   3  174.92    2.68   0
  -3 -10   3    1.17    2.02   0
  -3  -9   3   66.01    2.42   0
  -3  -8   3  173.19    2.59   0
  -3   0   5    0.08    2.18   0
  -2 -24   5   -4.59    2.62   0
  -2 -20   3    6.06    2.65   0
  -2 -17   2    1.01    1.68   0
  -2  -3   2  186.04    3.39   0
  -1 -24   3   22.32    2.60   0
  -1 -22   2    4.61    1.92   0
  -1 -19   1    5.41    1.71   0
  -1 -13   0   54.04    2.35   0
  -1  -7   0 1187.03    6.81   0
  -1  -1   1   44.64    3.30   0
  -1  10  12    1.43    3.58   0
   0 -25   2    5.91    2.87   0
   0 -23   1   -1.07    1.86   0
   0 -20   0  296.00    3.37   0
   0 -15  -1  110.58    2.52   0
   0  -5  -1   40.66    2.89   0
   0   3   1   52.41    3.94   0
   1 -20  -1   14.51    2.30   0
   1 -15  -2  135.15    2.81   0
   1  -5  -2 2366.23   15.32   0
   1   9   3   67.64    2.88   0
   1  12   6   19.85    2.24   0
   1  13   8   46.79    2.44   0
   2 -20  -2   75.59    2.74   0
   2 -14  -3  103.73    2.70   0
   3 -23  -2   -1.62    2.30   0
   3 -19  -3   23.59    2.59   0
   3   3  -2 1086.97    6.69   0
   3  11   2   71.14    2.36   0
   3  12   3   12.99    1.51   0
   3  13   4  557.63    4.09   0
   3  15   7    0.27    2.27   0
   4 -17  -4  161.35    3.51   0
   4   2  -3    6.90    2.33   0
   4   5  -2   24.36    2.29   0
   4  12   2   32.64    1.65   0
   4  14   4   14.24    1.70   0
   4  16   8   36.78    2.32   0
   5 -20  -4    6.68    2.51   0
   5  -7  -5   84.24    5.15   0
   5   0  -4   27.10    1.82   0
   5  13   2  139.25    2.31   0
   5  14   3    1.72    1.63   0
   5  15   4   10.00    2.25   0
   5  16   6   -0.53    1.91   0
   6 -22  -4   11.06    2.75   0
   6  -3  -5   22.42    2.33   0
   6   2  -4  219.57    3.25   0
   6  16   5  175.12    2.79   0
   6  17   7   25.62    2.99   0
   7 -19  -5   47.99    3.58   0
   7  12   0    2.52    2.27   0
   7  13   1    4.40    1.59   0
   7  15   3    5.23    1.94   0
   7  16   4   18.22    2.65   0
   8  -6  -6  350.14    4.96   0
   8   4  -4   37.48    1.77   0
   8   7  -3   43.97    2.69   0
   8   9  -2  217.24    2.65   0
   8  11  -1   63.46    2.26   0
   8  16   4   -2.43    2.08   0
   9  -4  -6  238.13    3.81   0
   9   5  -4    1.07    2.05   0
   9  11  -1  160.60    2.58   0
  10   5  -4   36.96    2.60   0
  10  11  -1    1.72    1.77   0
  11  -3  -6   22.79    2.57   0
  11   5  -4    9.32    2.63   0
  11  11  -1   52.86    2.96   0
  12  -4  -6    5.87    2.96   0
  12   1  -5    7.64    2.16   0
  12   7  -3   29.68    3.03   0
  -5 -12  11   29.82    2.36   0
  -5 -12  12   -3.81    2.29   0
  -5 -11  11   16.47    2.60   0
  -5 -11  12   20.55    2.63   0
  -5 -10  10    1.81    1.84   0
  -5 -10  11  112.62    3.05   0
  -5 -10  12   14.39    2.51   0
  -5  -9  10   28.31    2.16   0
  -5  -9  11   32.42    2.60   0
  -5  -9  12    4.52    2.70   0
  -5  -8  11    0.05    1.99   0
  -5  -8  12   -0.75    1.97   0
  -4 -19   9    1.72    2.93   0
  -4 -18   8    6.33    2.82   0
  -4 -17   7   11.36    1.96   0
  -4 -16   7    9.70    2.61   0
  -4 -14   6  195.50    2.63   0
  -4 -13   6  161.64    3.23   0
  -4  -6   6  129.80    2.78   0
  -4  -1   8    9.60    2.33   0
  -4   0   9   -0.25    2.51   0
  -3 -22   7   -5.24    2.67   0
  -3 -21   6   20.19    1.95   0
  -3 -19   5    2.04    1.95   0
  -3 -16   4   58.91    2.46   0
  -3  -3   4  421.54    4.28   0
  -2 -23   5   41.99    2.98   0
  -2 -22   4   54.53    2.14   0
  -2 -19   3  150.94    2.76   0
  -2 -16   2  152.10    2.50   0
  -2   0   3   -0.42    2.20   0
  -1 -21   2   15.83    2.48   0
  -1 -18   1   46.23    2.57   0
  -1 -12   0  307.50    3.21   0
  -1 -11   0    4.54    1.51   0
  -1 -10   0  656.60    4.88   0
  -1  -9   0  268.13    3.66   0
  -1  -8   0  891.63    5.58   0
  -1   9   7  212.83    4.49   0
  -1  10   9  161.86    4.32   0
   0 -22   1    3.52    2.55   0
   0 -19   0    5.23    2.29   0
   0 -14  -1   35.95    1.71   0
   0   7   3   64.18    3.01   0
   0  11   7  899.26    6.83   0
   0  12  10   12.84    2.65   0
   0  12  11   25.05    2.76   0
   1 -25   1   15.86    2.88   0
   1 -23   0    6.62    1.95   0
   1 -14  -2  545.63    4.61   0
   1   6   1 1400.41    8.05   0
   2 -23  -1    1.34    1.90   0
   2 -13  -3   92.89    2.69   0
   2 -12  -3  317.82    4.26   0
   2   6   0 1651.81    7.66   0
   2   8   1  186.26    2.88   0
   2  11   3 1633.54    6.92   0
   2  12   4   -2.35    2.08   0
   2  14   7    5.81    1.76   0
   3 -25  -1   -1.08    2.99   0
   3   6  -1   -2.84    1.99   0
   3   8   0   81.57    2.08   0
   3  14   5    2.75    1.79   0
   4  11   1  527.46    3.79   0
   4  15   5  132.61    2.35   0
   4  16   7   93.24    2.55   0
   5 -11  -5  134.56    5.69   0
   5   4  -3 1124.45    5.78   0
   5   7  -2  455.63    3.83   0
   5   9  -1   23.33    1.99   0
   5  12   1   -2.42    1.56   0
   5  16   5    1.85    2.19   0
   5  17   8   51.60    3.26   0
   6   8  -2  169.24    2.42   0
   6  10  -1  137.72    2.69   0
   6  13   1   91.23    2.77   0
   6  14   2   14.57    1.67   0
   6  15   3   42.66    2.36   0
   6  16   4  196.74    3.13   0
   6  17   6    1.31    2.94   0
   7   9  -2    7.75    2.32   0
   7  17   5    4.56    2.42   0
   8   1  -5   -0.40    2.26   0
   8  14   1   72.79    2.88   0
   8  15   2   -0.12    2.53   0
   8  16   3  137.39    3.01   0
   9   2  -5   15.89    2.28   0
   9   8  -3    2.55    2.04   0
   9  10  -2   13.53    2.47   0
   9  13   0   40.62    2.68   0
   9  14   1    3.26    2.11   0
  10  -3  -6    4.62    2.31   0
  10   2  -5   97.51    2.46   0
  10   8  -3   30.30    2.63   0
  10  10  -2    1.62    2.60   0
  10  13   0   79.21    2.35   0
  10  14   1  113.11    2.57   0
  11   2  -5   15.10    2.04   0
  11   8  -3   49.74    2.85   0
  11  10  -2    5.06    2.65   0
  12  -3  -6   22.66    3.10   0
  12   2  -5   27.43    3.02   0
  12   5  -4   11.07    2.15   0
  -4 -18   9    8.34    2.51   0
  -4 -17   8   34.21    2.49   0
  -4 -15   7   23.57    2.38   0
  -4 -12   6   17.50    1.81   0
  -4 -11   6   83.64    2.54   0
  -4 -10   6    5.78    2.28   0
  -4  -9   6  177.80    2.88   0
  -4  -8   6  216.17    3.04   0
  -4  -7   6  619.37    4.17   0
  -4  -3   7 1054.44    6.03   0
  -4  -1  14    0.15    3.17   0
  -4   0  13    3.23    2.93   0
  -3 -21   7   23.17    2.81   0
  -3 -20   6   23.25    2.00   0
  -3 -18   5   77.42    2.27   0
  -3 -15   4   31.04    1.84   0
  -3  -4   4  560.03    4.89   0
  -2 -21   4   -0.61    1.85   0
  -2 -18   3    2.19    2.31   0
  -2 -15   2    6.60    1.58   0
  -2 -14   2  150.87    2.74   0
  -2  -4   2  292.04    3.70   0
  -1 -23   3   63.37    2.22   0
  -1 -17   1    9.45    2.40   0
  -1   6   4   27.56    3.18   0
   0 -24   2   45.61    2.29   0
   0 -13  -1   46.04    1.83   0
   0 -12  -1  747.08    5.18   0
   0  -6  -1 2041.29   10.56   0
   0  12   9    1.46    2.64   0
   0  12  12    4.35    3.35   0
   1 -22   0   12.61    2.58   0
   1 -19  -1   -1.56    2.09   0
   1 -13  -2  207.19    3.33   0
   1   8   2 1335.73    7.40   0
   1  13   7   12.73    2.14   0
   2 -25   0   13.39    2.17   0
   2 -22  -1   15.11    2.64   0
   2 -19  -2   27.52    1.93   0
   2 -11  -3    4.79    2.12   0
   2  -7  -3  425.03    6.87   0
   2  10   2   48.43    2.46   0
   2  13   5    6.47    1.62   0
   2  15   9    3.72    2.36   0
   2  15  10   -1.49    2.72   0
   3 -22  -2   11.22    1.98   0
   3 -18  -3   75.14    2.58   0
   3  10   1   59.18    1.90   0
   3  15   6    0.57    2.43   0
   3  16   9   -0.28    2.78   0
   4 -24  -2   -2.07    2.64   0
   4 -21  -3    4.89    1.91   0
   4 -16  -4   49.90    2.81   0
   4   8  -1  115.77    2.65   0
   4  10   0   35.38    1.98   0
   4  16   6   85.91    2.89   0
   5 -23  -3    1.39    2.50   0
   5 -19  -4   11.53    2.43   0
   5   1  -4    8.80    2.09   0
   5  11   0    5.52    1.46   0
   5  17   7    0.80    1.92   0
   6 -21  -4   43.16    3.05   0
   6 -16  -5   34.22    3.48   0
   6  -2  -5   46.49    2.47   0
   6   3  -4    0.20    1.81   0
   6   6  -3   -0.77    2.08   0
   6  12   0    5.96    2.22   0
   7   0  -5    0.14    1.49   0
   7   4  -4  290.80    2.97   0
   7   7  -3   25.88    1.70   0
   7  11  -1   34.62    1.86   0
   7  14   1   -0.37    2.46   0
   7  15   2   16.04    1.93   0
   7  16   3    4.50    2.51   0
   8  -5  -6   40.14    2.66   0
   8   5  -4  253.83    2.84   0
   8   8  -3   61.21    2.54   0
   8  10  -2   -4.55    2.22   0
   8  13   0   51.99    2.03   0
   8  17   4    6.21    3.00   0
   9  -3  -6    2.23    2.42   0
   9   6  -4    7.90    2.09   0
   9  12  -1   -3.11    1.80   0
  10  -2  -6    8.39    2.41   0
  10   3  -5  107.35    3.01   0
  10   6  -4   -0.87    1.82   0
  10  12  -1   25.54    2.05   0
  11  -2  -6   17.74    2.93   0
  11   3  -5   70.79    2.90   0
  11   6  -4   -3.67    1.92   0
  11  12  -1   29.94    2.29   0
  12  -2  -6   -0.49    2.97   0
  -4 -17   9   26.05    2.01   0
  -4 -16   8    2.15    1.97   0
  -4 -14   7    7.18    1.68   0
  -4 -13   7    7.94    2.47   0
  -4  -4   7   13.57    2.11   0
  -4  -2   8  111.25    2.98   0
  -4  -1   9   45.98    2.74   0
  -4   0  10   11.24    2.52   0
  -4   0  11    0.95    2.85   0
  -4   0  12   12.58    2.68   0
  -3 -21   8    5.37    3.01   0
  -3 -20   7   -1.66    2.83   0
  -3 -19   6   32.39    2.09   0
  -3 -17   5   44.28    1.83   0
  -3 -14   4  112.46    2.14   0
  -3 -13   4   80.59    2.45   0
  -3  -1   5   37.72    2.59   0
  -2 -23   6    2.97    2.60   0
  -2 -22   5   42.42    2.18   0
  -2 -20   4   94.23    2.40   0
  -2 -17   3   15.27    2.55   0
  -2 -13   2   42.16    2.12   0
  -2  -5   2   20.78    2.29   0
  -2   4   5   99.65    7.61   0
  -1 -24   4   12.51    2.08   0
  -1 -22   3    5.41    1.99   0
  -1 -20   2   11.97    1.76   0
  -1 -16   1   17.08    2.14   0
   0 -25   3   19.26    2.20   0
   0 -23   2    4.83    2.70   0
   0 -21   1    0.92    1.93   0
   0 -18   0    4.46    1.66   0
   0 -11  -1  283.46    3.40   0
   0 -10  -1  738.02    5.45   0
   0  -9  -1  143.60    3.23   0
   0  -8  -1   48.81    2.38   0
   0  -7  -1   20.65    2.13   0
   1 -24   1  102.78    2.51   0
   1 -18  -1   44.25    2.85   0
   1 -12  -2  615.24    5.13   0
   1  -6  -2  176.86    4.20   0
   1  14  10  121.84    3.92   0
   2 -24   0   18.41    2.89   0
   2 -18  -2   34.06    2.52   0
   2 -10  -3  433.27    5.21   0
   2  -9  -3   61.57    2.87   0
   2  -8  -3   70.81    3.12   0
   2   4  -1   33.22    1.99   0
   2  14   6   41.44    2.51   0
   2  15   8   24.27    2.40   0
   3 -24  -1   64.52    3.12   0
   3 -17  -3   10.42    2.38   0
   3  13   3   22.36    2.29   0
   3  14   4   35.01    2.20   0
   3  16   8   -3.12    2.71   0
   4  -2  -4    0.33    2.18   0
   4   6  -2  130.58    2.83   0
   4  13   2   10.47    1.69   0
   4  14   3    2.30    1.64   0
   4  15   4   51.19    2.48   0
   4  17   8    1.74    2.84   0
   5 -10  -5  235.42    8.13   0
   5  -6  -5   16.67    3.10   0
   5   5  -3   35.59    2.39   0
   5  13   1    4.44    2.02   0
   5  14   2    9.78    1.85   0
   5  15   3    1.37    1.60   0
   5  16   4    3.06    2.31   0
   5  17   6   10.25    2.08   0
   6  15   2   84.08    2.58   0
   6  17   5    1.71    2.04   0
   7 -18  -5   13.68    3.51   0
   7  13   0   61.13    1.96   0
   7  17   4   -3.98    2.15   0
   8  -4  -6   13.21    2.43   0
   8   2  -5  240.08    3.03   0
   8  12  -1   49.09    1.95   0
   8  16   2   32.69    2.54   0
   9  -2  -6    9.05    2.16   0
   9   3  -5  170.97    3.09   0
   9   9  -3   -0.13    2.27   0
   9  11  -2   -3.70    2.14   0
   9  14   0   69.84    2.86   0
   9  15   1   52.79    2.37   0
   9  16   2   22.48    2.21   0
  10  -1  -6   38.82    2.45   0
  10   9  -3    4.29    1.94   0
  10  11  -2   13.64    2.56   0
  10  14   0   -0.23    2.93   0
  11  -1  -6   86.40    3.22   0
  11   9  -3   10.50    2.97   0
  11  11  -2    1.72    2.99   0
  12  -1  -6   -0.49    2.53   0
  12   3  -5  103.43    2.63   0
  -4 -17  10    2.94    2.31   0
  -4 -16   9    4.23    1.97   0
  -4 -16  10    5.32    2.96   0
  -4 -15   8  182.98    2.83   0
  -4 -14   8   31.61    2.78   0
  -4 -12   7   12.67    1.97   0
  -4 -11   7  136.40    2.87   0
  -4 -10   7  293.71    3.50   0
  -4  -6   7  396.78    3.74   0
  -4  -5   7    3.53    1.49   0
  -4  -3   8   25.14    2.37   0
  -4  -2  14    2.42    2.71   0
  -4  -1  13   10.70    2.95   0
  -3 -19   7   20.71    2.58   0
  -3 -18   6   30.56    2.05   0
  -3 -16   5   20.69    1.82   0
  -3 -12   4   50.98    1.85   0
  -3 -11   4   36.52    2.37   0
  -3 -10   4  112.49    2.45   0
  -3  -6   4  276.44    3.63   0
  -3  -5   4   33.94    1.87   0
  -3   1   6  570.80    6.22   0
  -3   4  13   31.29    4.11   0
  -2 -22   6   64.59    3.12   0
  -2 -21   5   11.72    1.88   0
  -2 -19   4  120.99    2.96   0
  -2 -16   3  106.31    2.72   0
  -2 -12   2  200.61    2.55   0
  -2 -11   2   28.57    2.18   0
  -2  -6   2   53.87    2.50   0
  -1 -24   5    9.89    2.93   0
  -1 -23   4   -0.80    2.04   0
  -1 -21   3   50.87    2.64   0
  -1 -19   2   16.86    1.77   0
  -1 -15   1   77.22    2.42   0
  -1  10  13    3.44    4.67   0
   0 -20   1  140.91    2.75   0
   0 -17   0   -1.33    1.63   0
   0  10   5  295.93    4.15   0
   0  12   8    9.45    2.36   0
   1 -25   2    3.09    2.85   0
   1 -21   0   -1.97    1.87   0
   1 -11  -2   57.37    2.15   0
   1 -10  -2    5.32    2.48   0
   1  -7  -2    9.02    2.04   0
   1   4   0 3080.19   13.43   0
   1  11   4   53.12    2.46   0
   1  12   5  197.04    3.28   0
   1  14   9   15.01    2.54   0
   1  14  11   17.58    2.96   0
   2 -21  -1   -2.28    2.58   0
   3 -21  -2   38.75    2.08   0
   3   0  -3    0.32    2.03   0
   3   4  -2   64.69    2.59   0
   3   9   0   14.73    2.06   0
   3  12   2   55.07    1.99   0
   3  15   5    7.29    2.35   0
   3  16   7   37.42    2.73   0
   4 -23  -2    7.89    2.74   0
   4 -20  -3   12.60    2.26   0
   4 -15  -4    6.64    2.18   0
   4   3  -3  360.43    3.85   0
   4  12   1    0.10    1.52   0
   4  16   5  160.97    3.36   0
   4  17   7    2.16    2.82   0
   5 -22  -3    1.56    2.68   0
   5   8  -2  191.71    2.79   0
   5  10  -1  213.22    2.66   0
   5  17   5   13.76    2.38   0
   6  -1  -5   47.04    2.47   0
   6   9  -2   55.48    1.74   0
   6  11  -1 1356.37    5.44   0
   6  14   1   57.17    2.01   0
   6  16   3  118.52    2.38   0
   6  17   4   17.46    2.57   0
   6  18   6    6.07    3.00   0
   7   1  -5  101.30    2.27   0
   7   5  -4    0.95    1.56   0
   7   8  -3   42.86    2.41   0
   7  10  -2   52.30    1.85   0
   7  12  -1  104.75    2.78   0
   7  16   2   73.56    2.68   0
   8  -3  -6    0.89    2.14   0
   8   6  -4   61.28    2.03   0
   8  11  -2   -0.45    2.14   0
   8  14   0    7.43    1.84   0
   8  15   1    0.05    1.76   0
   8  17   3   -5.36    2.17   0
   9 -15  -6   16.62    6.07   0
   9   7  -4   29.27    2.06   0
   9  13  -1    2.02    2.69   0
  10   4  -5  101.82    2.40   0
  10   7  -4  100.84    2.30   0
  10  13  -1    5.09    1.97   0
  11   0  -6  264.75    3.96   0
  11   4  -5    1.44    1.93   0
  11   7  -4   32.88    2.16   0
  12   0  -6   11.54    2.70   0
  12   4  -5    3.29    2.92   0
  -4 -15   9    8.09    1.88   0
  -4 -15  10   68.45    2.79   0
  -4 -15  11   14.52    2.95   0
  -4 -14   9   31.36    2.60   0
  -4 -13   8   15.89    1.79   0
  -4 -12   8  148.86    2.84   0
  -4  -9   7   37.45    1.91   0
  -4  -8   7   39.61    1.88   0
  -4  -7   7  145.50    2.52   0
  -4  -4   8   17.84    2.31   0
  -4  -3  14    6.80    2.81   0
  -4  -2   9  252.26    3.84   0
  -4  -2  13   73.98    3.32   0
  -4  -1  10   35.46    2.69   0
  -4  -1  11   49.83    2.88   0
  -4  -1  12   50.47    2.97   0
  -3 -17   6   95.44    2.26   0
  -3 -15   5  128.24    2.46   0
  -3 -14   5   68.42    2.59   0
  -3  -9   4   70.60    1.93   0
  -3  -8   4  906.32    5.08   0
  -3  -7   4   25.83    1.68   0
  -3   3  14   34.45    4.25   0
  -3   4   9    2.57    3.05   0
  -2 -20   5   33.51    2.62   0
  -2 -18   4   -5.28    2.33   0
  -2 -15   3   11.04    2.14   0
  -2 -10   2   51.37    1.90   0
  -2  -9   2  210.35    2.84   0
  -2  -8   2  218.69    2.93   0
  -2  -7   2  217.36    2.90   0
  -1 -22   4   18.87    2.56   0
  -1 -18   2   81.79    2.51   0
  -1 -14   1    2.28    2.06   0
  -1  10   8   16.01    2.44   0
   0 -24   3   26.78    2.18   0
   0 -22   2   88.98    2.38   0
   0 -16   0  197.35    3.05   0
   0   9   4   13.64    2.33   0
   0  11   6    9.11    2.23   0
   1 -23   1   59.45    2.17   0
   1 -17  -1   16.52    1.81   0
   1  -9  -2   78.76    2.47   0
   1  -8  -2  768.39    6.72   0
   1  10   3   24.46    1.87   0
   1  13   6  112.70    3.01   0
   1  14   8   66.45    3.08   0
   2 -25   1    2.49    2.88   0
   2 -23   0    5.09    2.61   0
   2 -17  -2   -0.94    2.08   0
   2   7   0  693.44    4.97   0
   2   9   1  208.72    2.92   0
   2  12   3  242.23    3.34   0
   2  13   4   28.16    2.22   0
   2  14   5   18.51    2.26   0
   2  15   7  166.81    3.55   0
   3 -25   0    8.10    2.98   0
   3 -23  -1   62.75    3.06   0
   3 -16  -3    0.01    2.15   0
   3   7  -1    8.14    1.67   0
   3  11   1   68.25    2.30   0
   4   9  -1  159.12    2.77   0
   4  17   6    2.84    2.41   0
   5 -18  -4   13.01    2.70   0
   5   2  -4  378.86    4.11   0
   5  12   0   56.80    1.89   0
   5  18   7  134.84    2.97   0
   6 -20  -4   59.05    3.14   0
   6   4  -4    6.82    1.54   0
   6   7  -3  411.33    3.35   0
   6  13   0   -0.14    1.65   0
   6  18   5    5.47    2.47   0
   7  -8  -6  429.72    7.73   0
   7  14   0   75.28    2.57   0
   7  15   1   47.83    2.15   0
   7  17   3   26.12    1.99   0
   8 -19  -5   20.18    3.76   0
   8   3  -5    5.31    1.67   0
   8   9  -3   48.74    1.85   0
   8  13  -1   23.64    2.70   0
   9  -1  -6    2.08    1.73   0
   9   4  -5  116.10    2.38   0
   9  10  -3   61.29    2.63   0
   9  16   1    7.43    3.05   0
  10   0  -6    9.71    1.74   0
  10  10  -3   36.83    2.00   0
  10  12  -2   36.64    2.89   0
  10  15   0    6.74    2.89   0
  11   1  -6   85.55    3.01   0
  11   5  -5   14.28    2.71   0
  11   8  -4   61.04    2.84   0
  11  10  -3    2.01    2.04   0
  11  12  -2   10.51    2.88   0
  12   5  -5   13.55    2.67   0
  -4 -14  10  139.21    2.68   0
  -4 -14  11   62.71    2.72   0
  -4 -13   9    7.29    1.83   0
  -4 -13  10    1.51    2.54   0
  -4 -13  12   16.59    3.15   0
  -4 -12   9   39.30    2.80   0
  -4 -11   8   -2.60    1.73   0
  -4 -10   8   -2.33    2.42   0
  -4  -9   8  111.99    2.88   0
  -4  -6   8  188.99    3.27   0
  -4  -5   8   68.05    2.75   0
  -4  -3   9  468.81    4.54   0
  -4  -3  13   31.48    2.91   0
  -4  -2  10    1.26    2.34   0
  -4  -2  12   27.26    2.70   0
  -3 -19   8    8.90    1.90   0
  -3 -19   9   39.82    3.15   0
  -3 -18   7   38.86    2.13   0
  -3 -16   6    8.11    1.65   0
  -3 -13   5   21.60    2.27   0
  -3  -2   5 1283.60    7.45   0
  -3   2   7  142.24    4.00   0
  -2 -22   7   11.71    2.13   0
  -2 -21   6  133.14    2.59   0
  -2 -19   5   11.07    2.54   0
  -2 -17   4   16.28    2.41   0
  -2 -14   3   91.57    2.43   0
  -2  -1   3  885.31    7.54   0
  -2   2   4  126.01    4.67   0
  -1 -23   5   22.26    2.17   0
  -1 -20   3   16.84    1.97   0
  -1 -17   2    9.62    2.35   0
  -1 -13   1   61.40    2.24   0
  -1  -2   1 2521.41   14.01   0
   0 -23   3    1.31    2.33   0
   0 -21   2   26.73    2.58   0
   0 -19   1    7.84    1.77   0
   0 -15   0   -1.45    2.00   0
   0   6   2   56.29    2.72   0
   0  12   7    1.47    2.78   0
   1 -24   2   -0.02    2.52   0
   1 -22   1   58.82    2.78   0
   1 -20   0    6.02    1.66   0
   1 -16  -1   13.10    2.08   0
   2 -20  -1    4.58    2.29   0
   2   1  -2   97.95    3.13   0
   2  11   2  345.20    3.84   0
   2  16  10    1.57    2.64   0
   3 -20  -2   42.75    2.20   0
   3  16   6   33.36    2.06   0
   3  17   8    2.21    2.54   0
   3  17   9    9.56    3.12   0
   4 -22  -2   20.88    2.76   0
   4 -19  -3   54.40    2.75   0
   4 -14  -4   57.93    2.79   0
   4  -1  -4  572.18    6.07   0
   4   7  -2    7.96    2.14   0
   4  11   0   89.74    2.03   0
   4  14   2    9.32    2.29   0
   4  15   3  243.82    2.88   0
   4  16   4   -5.62    2.20   0
   5  -5  -5  271.32    5.61   0
   5   6  -3  317.32    3.60   0
   5  14   1   75.21    2.59   0
   5  15   2   67.56    2.03   0
   5  16   3   11.17    1.92   0
   5  17   4   15.20    2.24   0
   5  18   6   96.48    3.30   0
   6 -15  -5  140.77    4.29   0
   6   0  -5    0.93    2.09   0
   6  10  -2    4.55    2.17   0
   6  12  -1   25.97    2.35   0
   6  15   1   71.36    2.37   0
   6  16   2   41.34    2.69   0
   6  17   3   29.07    2.39   0
   7  -9  -6   90.15    5.15   0
   7  -7  -6   13.27    3.26   0
   7  -6  -6   23.49    2.79   0
   7   2  -5   -0.05    1.59   0
   7   6  -4  155.87    2.53   0
   7   9  -3   85.61    2.49   0
   7  11  -2    1.77    1.83   0
   7  13  -1   60.70    2.35   0
   7  18   4   53.37    2.35   0
   8  -2  -6   28.01    2.79   0
   8   4  -5  135.01    2.80   0
   8   7  -4   13.30    1.77   0
   8  15   0   10.15    2.67   0
   8  16   1  135.01    2.53   0
   8  17   2    3.84    2.15   0
   8  18   3   12.71    2.71   0
   9   0  -6 1076.18    6.14   0
   9   5  -5    4.53    2.05   0
   9   8  -4   21.10    2.41   0
   9  12  -2   21.43    1.98   0
   9  14  -1   14.80    2.59   0
   9  15   0   25.21    2.07   0
  10   1  -6   36.47    2.80   0
  10   5  -5   60.02    2.20   0
  10   8  -4  148.53    2.58   0
  10  14  -1   66.37    2.51   0
  12   1  -6   -2.48    2.28   0
  -4 -13  11    3.47    2.19   0
  -4 -12  10   30.80    2.50   0
  -4 -12  11   -1.94    2.72   0
  -4 -12  12   34.76    2.82   0
  -4 -11   9   83.69    2.68   0
  -4 -10   9  383.31    3.83   0
  -4  -8   8  343.43    3.30   0
  -4  -7   8  371.05    3.56   0
  -4  -4   9   69.74    2.74   0
  -4  -4  13   17.56    3.03   0
  -4  -3  10   86.18    2.91   0
  -4  -3  12   -4.81    2.68   0
  -4  -2  11  250.89    3.90   0
  -3 -18   8   40.65    2.13   0
  -3 -18   9   -2.14    2.87   0
  -3 -17   7   79.33    2.28   0
  -3 -15   6  162.34    2.49   0
  -3 -12   5   73.92    2.04   0
  -3 -11   5  518.95    3.93   0
  -3  -3   5  147.37    3.43   0
  -3   0   6   86.71    3.04   0
  -3   3   8   15.56    2.57   0
  -3   4  12   15.18    3.13   0
  -2 -21   7   37.78    2.65   0
  -2 -20   6   36.39    2.00   0
  -2 -13   3   99.80    2.64   0
  -1 -22   5   -1.71    2.83   0
  -1 -21   4    5.18    2.05   0
  -1 -19   3   57.34    2.36   0
  -1 -12   1  110.86    2.67   0
   0 -24   4   27.09    2.31   0
   0 -18   1   66.71    2.58   0
   0   8   3   77.82    2.97   0
   0  13  10   84.59    3.25   0
   0  13  11    0.47    3.03   0
   1 -25   3   31.41    2.83   0
   1 -19   0   28.16    2.46   0
   1   1  -1   42.12    3.20   0
   1   7   1 3275.56   11.40   0
   1   9   2    9.31    2.35   0
   1  14   7  230.90    3.55   0
   2 -24   1   -1.54    2.84   0
   2 -22   0   46.62    2.68   0
   2 -16  -2  145.43    2.69   0
   2   5  -1    6.96    2.32   0
   2  15   6   18.10    1.83   0
   2  16   8   41.72    2.69   0
   2  16   9  107.83    2.99   0
   3 -22  -1   -0.30    2.62   0
   3 -15  -3  256.78    3.81   0
   3  13   2 1073.08    5.37   0
   3  14   3   51.74    2.02   0
   3  15   4   51.11    2.18   0
   4 -24  -1    7.20    2.97   0
   4   4  -3  579.14    4.51   0
   4  13   1    8.48    1.69   0
   4  17   5   -4.67    2.54   0
   4  18   7    0.22    2.45   0
   4  18   8    3.42    2.26   0
   5 -21  -3    0.64    2.32   0
   5 -17  -4  135.36    3.77   0
   5  -9  -5    5.80    4.25   0
   5   9  -2  391.38    3.28   0
   5  11  -1   32.67    1.71   0
   5  13   0  677.70    4.35   0
   5  18   5  126.91    2.88   0
   6   5  -4  230.33    3.21   0
   6   8  -3  171.58    2.43   0
   6  14   0    3.17    2.38   0
   6  18   4   23.53    2.73   0
   7 -21  -4   -0.64    2.48   0
   7 -21  -4    1.43    1.42   0
   7 -17  -5   15.96    3.16   0
   7  -5  -6   18.07    2.86   0
   7   3  -5   -0.99    1.83   0
   7  16   1    1.76    2.56   0
   7  17   2   -3.68    1.87   0
   7  18   3   69.42    2.88   0
   8  -1  -6    7.41    2.54   0
   8  10  -3    8.11    1.68   0
   8  12  -2  224.25    2.80   0
   8  14  -1   21.80    2.62   0
   9   1  -6    9.62    2.12   0
   9  11  -3   46.96    2.49   0
   9  17   1    7.15    2.64   0
  10   2  -6    5.50    2.27   0
  10   6  -5  143.57    3.05   0
  10   9  -4   -0.03    2.61   0
  10  11  -3    1.59    1.90   0
  10  13  -2    1.92    2.95   0
  11   2  -6   12.36    2.19   0
  11   6  -5   47.64    2.23   0
  11   9  -4   -7.07    2.85   0
  11  11  -3  146.44    2.71   0
  12   2  -6   -3.51    2.97   0
  12   6  -5    2.28    2.10   0
  -4 -11  10   18.19    2.00   0
  -4 -11  11   12.80    2.12   0
  -4 -11  12    2.99    2.23   0
  -4 -10  10  110.60    2.87   0
  -4 -10  11   42.16    2.92   0
  -4 -10  12   56.98    2.95   0
  -4  -9   9   52.11    2.04   0
  -4  -9  10  214.91    3.68   0
  -4  -9  12    1.73    2.94   0
  -4  -9  13   13.60    2.26   0
  -4  -8   9    2.81    2.16   0
  -4  -8  12    0.40    2.84   0
  -4  -8  13   24.44    2.41   0
  -4  -7   9   49.97    2.55   0
  -4  -7  13    3.47    2.62   0
  -4  -6   9  338.51    4.01   0
  -4  -6  13   -1.41    2.51   0
  -4  -5   9   10.06    1.91   0
  -4  -5  12   31.71    2.80   0
  -4  -5  13   13.71    2.26   0
  -4  -4  10   12.15    2.39   0
  -4  -4  11   15.62    2.88   0
  -4  -4  12    7.20    2.73   0
  -4  -3  11   20.03    2.62   0
  -3 -18  10   12.50    2.18   0
  -3 -17   8   49.96    2.24   0
  -3 -17   9    4.82    2.81   0
  -3 -16   7    5.41    1.98   0
  -3 -15   7    7.07    2.18   0
  -3 -14   6   16.62    1.85   0
  -3 -10   5   98.17    2.27   0
  -3  -9   5   53.51    2.35   0
  -3  -4   5  531.11    4.83   0
  -3   4  10   25.28    3.22   0
  -3   4  11   20.05    3.32   0
  -2 -21   8  180.57    3.34   0
  -2 -19   6   13.34    2.67   0
  -2 -18   5    0.25    1.71   0
  -2 -16   4  186.69    2.58   0
  -2 -12   3  321.14    3.32   0
  -1 -23   6    2.48    2.18   0
  -1 -20   4   -5.13    2.57   0
  -1 -18   3  138.27    2.97   0
  -1 -16   2   74.71    2.08   0
  -1 -11   1  108.58    2.27   0
  -1  -3   1  642.94    6.88   0
  -1   8   5  113.68    3.88   0
  -1   9   6  387.83    5.61   0
  -1  11  10    1.52    3.48   0
   0 -23   4    8.67    2.88   0
   0 -22   3   -0.30    2.02   0
   0 -20   2  120.87    2.45   0
   0 -14   0   -0.60    1.53   0
   0  13   9   15.18    2.77   0
   1 -23   2   -2.22    1.97   0
   1 -21   1   82.54    2.70   0
   1 -15  -1   76.69    2.03   0
   1  12   4    7.00    2.18   0
   1  13   5   10.48    2.01   0
   1  15  10   -3.36    2.52   0
   2 -25   2   69.18    3.30   0
   2 -19  -1   72.04    2.47   0
   2 -15  -2    0.24    2.11   0
   3 -24   0    5.20    2.04   0
   3 -19  -2    6.07    1.75   0
   3   1  -3   80.29    2.73   0
   3   5  -2   39.38    1.85   0
   3   8  -1   33.09    2.34   0
   3  10   0    4.18    1.50   0
   3  16   5   31.52    1.76   0
   3  17   7   17.91    2.01   0
   4 -18  -3   23.46    2.40   0
   4 -13  -4  258.63    4.63   0
   4  10  -1   88.87    2.33   0
   4  12   0   23.92    2.06   0
   5 -23  -2   -1.62    3.05   0
   5  -4  -5    5.11    1.96   0
   5   3  -4    0.60    1.55   0
   5   7  -3  979.53    5.12   0
   5  16   2   20.46    2.12   0
   6 -22  -3   19.21    3.01   0
   6 -19  -4    6.47    2.98   0
   6   1  -5   50.69    2.42   0
   6  11  -2  119.38    2.77   0
   6  19   5    3.29    2.94   0
   7  -4  -6   48.20    2.75   0
   7   7  -4   67.56    2.53   0
   7  12  -2   20.27    2.37   0
   7  15   0  347.07    3.34   0
   7  19   4    8.41    2.92   0
   8   0  -6    0.38    2.28   0
   8   5  -5   93.74    2.81   0
   8   8  -4  150.31    2.38   0
   8  17   1   44.81    2.92   0
   9   6  -5   11.59    2.52   0
   9   9  -4   69.87    2.89   0
   9  13  -2   21.90    2.07   0
   9  15  -1   63.88    2.66   0
   9  16   0   11.27    2.02   0
  10  15  -1    8.26    2.15   0
  11  -8  -7   -1.46    3.27   0
  11  -7  -7   12.16    2.55   0
  11  -6  -7   11.23    2.58   0
  11  -5  -7   -2.72    2.94   0
  11   3  -6   24.61    2.87   0
  11   7  -5   -0.67    2.54   0
  11  12  -3    6.75    2.65   0
  12   3  -6   22.69    3.12   0
  -4  -9  11   13.95    1.95   0
  -4  -8  10    0.52    1.75   0
  -4  -8  11    1.81    1.93   0
  -4  -7  10  110.18    2.40   0
  -4  -7  11    5.83    2.36   0
  -4  -7  12    8.80    2.10   0
  -4  -6  10    0.69    1.72   0
  -4  -6  11   52.57    2.67   0
  -4  -6  12   20.76    2.14   0
  -4  -5  10  229.08    3.02   0
  -4  -5  11    5.02    1.91   0
  -3 -17  10   10.35    2.17   0
  -3 -16   8   60.44    2.20   0
  -3 -16   9   14.81    2.58   0
  -3 -14   7  242.87    3.26   0
  -3 -13   6  142.44    2.38   0
  -3 -12   6   95.34    2.80   0
  -3  -8   5  511.95    3.78   0
  -3  -7   5  190.51    2.80   0
  -3  -6   5  847.95    5.13   0
  -3  -5   5   14.17    1.87   0
  -3   2  14   13.57    3.02   0
  -3   3  13   10.46    3.38   0
  -2 -20   8   -1.05    2.83   0
  -2 -17   5   81.96    2.08   0
  -2 -15   4  109.16    2.22   0
  -2 -11   3    9.08    1.47   0
  -2  -2   3   65.91    2.79   0
  -1 -22   6   28.79    2.61   0
  -1 -21   5   44.44    2.03   0
  -1 -15   2  135.06    2.29   0
  -1 -10   1   59.56    1.96   0
  -1  -9   1  227.28    3.43   0
  -1  10   7  116.76    3.76   0
  -1  11  11    4.50    3.76   0
   0 -24   5    6.68    2.21   0
   0 -21   3   23.47    2.49   0
   0 -17   1   59.60    2.06   0
   0 -13   0   -1.07    1.49   0
   0  11   5  888.64    6.40   0
   0  13   8   31.30    3.06   0
   0  13  12   18.28    3.73   0
   1 -24   3   25.78    2.28   0
   1 -18   0  164.32    2.89   0
   1 -14  -1    3.29    2.17   0
   1   5   0 1580.06    8.99   0
   1  11   3   80.27    2.79   0
   1  14   6   36.64    2.60   0
   1  15   9    0.90    2.67   0
   1  15  11    9.74    3.19   0
   2 -23   1   22.22    2.45   0
   2 -21   0   17.80    2.54   0
   2   8   0   95.60    2.32   0
   2  10   1 4939.16   12.03   0
   2  13   3  348.70    3.36   0
   2  14   4    1.89    1.78   0
   2  15   5  151.85    3.23   0
   2  16   7   21.88    2.05   0
   3 -25   1   11.25    2.71   0
   3 -21  -1   63.25    2.79   0
   3 -14  -3    2.45    2.10   0
   3  12   1    4.81    1.52   0
   3  17   6   39.68    2.74   0
   4 -23  -1   -3.24    3.06   0
   4 -21  -2  142.24    3.05   0
   4   0  -4 5316.44   15.97   0
   4   5  -3   20.99    2.21   0
   4   8  -2  281.26    3.42   0
   4  15   2   15.87    1.71   0
   4  16   3   35.89    1.89   0
   4  17   4   23.65    2.63   0
   4  18   6   28.88    2.06   0
   5 -20  -3   12.60    2.66   0
   5  -3  -5    0.82    2.23   0
   5  10  -2   16.08    2.19   0
   5  12  -1   -2.33    2.19   0
   5  15   1   30.44    1.79   0
   5  17   3  103.36    2.33   0
   5  18   4   57.70    2.85   0
   5  19   6   -0.99    2.14   0
   6 -14  -5    2.80    3.02   0
   6   6  -4  650.66    4.39   0
   6   9  -3   61.94    2.43   0
   6  13  -1  449.70    3.42   0
   6  16   1   -1.22    1.70   0
   6  17   2   32.47    1.93   0
   6  18   3    2.39    1.98   0
   7  -3  -6   47.60    2.61   0
   7   4  -5   21.84    2.40   0
   7  10  -3   44.97    1.79   0
   7  14  -1    1.57    1.49   0
   7  17   1   61.29    2.62   0
   7  18   2   82.96    2.86   0
   8  11  -3   39.07    1.78   0
   8  13  -2  153.91    2.74   0
   8  15  -1   51.34    2.55   0
   8  16   0   19.07    1.95   0
   9   2  -6    7.36    1.64   0
   9  12  -3   14.76    2.47   0
  10   3  -6    9.71    1.85   0
  10   7  -5   12.75    2.00   0
  10  10  -4   21.90    2.62   0
  10  12  -3   -0.98    1.91   0
  10  14  -2    0.54    2.14   0
  11  -9  -7    4.31    3.67   0
  11  -4  -7   17.53    2.82   0
  11   4  -6   59.31    2.78   0
  11  10  -4    1.45    2.12   0
  12   4  -6    3.37    2.63   0
  -3 -16  10  107.84    2.72   0
  -3 -16  11   -4.07    2.18   0
  -3 -15   8   33.09    2.13   0
  -3 -15   9   22.74    2.71   0
  -3 -13   7   41.50    2.48   0
  -3 -11   6   79.85    2.44   0
  -3  -1   6  568.87    5.42   0
  -3   1   7   23.03    2.62   0
  -2 -20   9   -5.01    2.18   0
  -2 -19   7   32.06    2.07   0
  -2 -18   6   95.96    2.31   0
  -2 -16   5   28.81    2.34   0
  -2 -14   4   95.14    2.06   0
  -2 -10   3  437.70    3.64   0
  -2  -9   3   57.14    2.44   0
  -2  -3   3  160.88    3.41   0
  -1 -22   7    8.80    2.95   0
  -1 -20   5    2.40    2.52   0
  -1 -19   4  101.81    2.36   0
  -1 -17   3   10.99    1.67   0
  -1 -14   2  549.08    4.07   0
  -1  -8   1   19.60    1.70   0
  -1  -7   1 1815.12    8.09   0
  -1  -5   1  577.89    5.58   0
  -1  -4   1 3656.90   13.86   0
  -1  11   9   -0.69    2.92   0
   0 -22   4  141.24    2.92   0
   0 -19   2  181.63    2.49   0
   0 -16   1  333.84    3.50   0
   0 -12   0    0.83    2.14   0
   0   4   1 2442.78   14.64   0
   0  10   4   26.58    2.53   0
   0  12   6   13.68    2.45   0
   1 -22   2    2.40    1.97   0
   1 -20   1    7.77    1.61   0
   1  15   8    2.00    2.67   0
   2 -24   2    3.15    2.75   0
   2 -18  -1   62.67    2.20   0
   2 -14  -2  152.62    3.05   0
   2   2  -2   94.79    3.34   0
   2  12   2   42.10    1.81   0
   2  16   6    5.60    2.27   0
   3 -23   0   -3.01    1.98   0
   3 -18  -2    7.82    1.68   0
   3  15   3   50.91    1.91   0
   3  16   4   61.20    2.70   0
   3  18   8   48.00    2.95   0
   4  14   1    0.65    1.66   0
   4  18   5    6.44    2.69   0
   5 -16  -4   48.14    2.74   0
   5   4  -4   10.21    1.65   0
   5  14   0   11.09    1.88   0
   5  19   5    3.15    2.93   0
   6   2  -5   47.06    2.46   0
   6  15   0   77.94    2.06   0
   6  19   4    1.45    2.13   0
   7 -20  -4   12.69    2.84   0
   7  -2  -6   10.43    2.11   0
   7   8  -4    8.45    1.73   0
   7  13  -2   44.75    2.18   0
   7  16   0   36.90    2.06   0
   7  19   3    5.14    2.15   0
   8 -18  -5   45.03    3.73   0
   8   1  -6   13.18    2.47   0
   8   6  -5  192.74    3.14   0
   8   9  -4    5.16    1.59   0
   8  18   1   20.03    2.62   0
   9   3  -6   -1.84    2.58   0
   9   7  -5   54.67    2.27   0
   9  10  -4   28.59    2.08   0
   9  14  -2    0.88    1.94   0
   9  16  -1    4.64    2.57   0
   9  17   0   -4.60    2.21   0
  10  -8  -7   26.32    3.38   0
  10  -7  -7   -0.66    2.75   0
  10  -6  -7   56.60    3.14   0
  10  -5  -7   11.33    2.65   0
  10  -4  -7  120.27    3.28   0
  10   4  -6   82.35    2.91   0
  10   8  -5   22.92    2.45   0
  10  13  -3    6.87    2.63   0
  11  -3  -7    0.28    2.08   0
  11  -2  -7    2.27    2.53   0
  11   8  -5   12.36    2.11   0
  11  11  -4    5.72    2.57   0
  -3 -15  10    1.27    1.98   0
  -3 -15  11    6.80    2.24   0
  -3 -14   8    1.70    1.77   0
  -3 -14   9  118.64    3.11   0
  -3 -12   7   49.46    2.59   0
  -3 -10   6   12.08    1.60   0
  -3  -9   6   42.63    2.34   0
  -3  -2   6   22.13    2.48   0
  -3   1  14   51.51    3.55   0
  -3   3   9   31.74    2.90   0
  -3   3  12   66.04    3.50   0
  -2 -19   8   22.33    2.21   0
  -2 -19   9   76.25    3.28   0
  -2 -18   7   60.55    2.11   0
  -2 -17   6   17.70    1.89   0
  -2 -15   5   62.96    2.54   0
  -2 -13   4  206.01    2.56   0
  -2  -8   3   74.65    2.09   0
  -2  -7   3  425.99    4.18   0
  -2  -4   3  905.20    6.19   0
  -2   7  13   49.71    5.42   0
  -1 -21   6    0.26    1.96   0
  -1 -18   4  111.99    2.76   0
  -1 -16   3   29.49    2.39   0
  -1 -13   2  219.63    2.92   0
  -1  -6   1 1408.32    7.54   0
  -1  11  12    4.69    4.69   0
   0 -20   3   58.92    2.13   0
   0 -18   2   29.46    2.58   0
   0 -11   0    1.19    2.24   0
   1 -24   4    1.50    2.10   0
   1 -23   3  157.51    2.77   0
   1 -21   2   37.15    2.69   0
   1 -17   0    1.27    1.67   0
   1 -13  -1   59.94    2.36   0
   1   8   1  397.04    4.01   0
   1  10   2  347.47    4.09   0
   1  15   7   26.54    2.45   0
   2 -22   1    0.72    2.39   0
   2 -20   0   41.84    2.47   0
   2   6  -1   10.44    1.69   0
   2  17   8   37.64    2.93   0
   2  17   9   12.11    2.23   0
   3 -24   1    7.61    3.04   0
   3 -13  -3    7.06    2.17   0
   3   2  -3 2829.68   11.36   0
   3   6  -2  523.64    4.30   0
   3   9  -1   63.74    2.50   0
   3  11   0    6.61    1.46   0
   3  17   5   61.01    3.04   0
   3  18   7  149.46    3.43   0
   4 -24   0   19.09    3.02   0
   4 -20  -2    3.11    2.63   0
   4 -17  -3   71.93    2.56   0
   4 -12  -4  192.79    4.00   0
   4   1  -4  594.60    5.47   0
   4  11  -1  683.66    4.13   0
   4  13   0   23.65    2.10   0
   4  19   7    4.73    2.13   0
   5 -22  -2   23.86    2.72   0
   5  -2  -5  338.13    4.66   0
   5   8  -3  344.94    3.10   0
   5  17   2    6.75    2.62   0
   5  18   3   -1.02    2.52   0
   6 -21  -3   -0.78    2.71   0
   6 -18  -4   -0.14    2.78   0
   6   7  -4   -3.22    2.10   0
   6  10  -3  243.46    3.02   0
   6  12  -2   24.56    1.80   0
   6  14  -1   16.28    1.80   0
   6  17   1  104.02    2.78   0
   6  18   2   -2.20    2.71   0
   7 -16  -5    4.98    3.24   0
   7  -1  -6    9.78    2.11   0
   7   5  -5   -2.80    2.24   0
   7  11  -3   35.13    1.83   0
   7  15  -1   67.88    2.23   0
   8   2  -6   26.90    2.46   0
   8  10  -4   -4.64    2.02   0
   8  12  -3   11.42    1.83   0
   8  14  -2    8.03    1.94   0
   8  17   0    1.03    2.05   0
   9  13  -3   10.57    2.74   0
  10  -9  -7    5.04    3.18   0
  10  -3  -7    2.06    2.62   0
  10  -2  -7  221.91    3.79   0
  10   5  -6   46.32    2.49   0
  10  11  -4   24.48    2.00   0
  10  15  -2   29.13    2.27   0
  11  -1  -7    0.30    2.86   0
  11   5  -6    3.31    2.12   0
  11   9  -5    4.75    2.53   0
  -3 -14  10    0.58    2.01   0
  -3 -14  11   15.57    2.23   0
  -3 -13   8   65.90    2.11   0
  -3 -13   9  122.08    3.09   0
  -3 -13  12   46.73    3.16   0
  -3 -12   8  233.78    3.16   0
  -3 -11   7  301.38    3.10   0
  -3  -8   6  481.14    3.77   0
  -3  -7   6  183.80    3.07   0
  -3  -6   6   60.24    2.54   0
  -3  -5   6  388.84    4.05   0
  -3  -4   6  580.79    4.85   0
  -3  -3   6    1.09    2.40   0
  -3   0  14   15.58    3.28   0
  -3   2   8   13.66    2.30   0
  -3   2  13    6.00    2.56   0
  -3   3  11   11.72    3.17   0
  -2 -18   8   56.22    2.23   0
  -2 -18   9   96.73    3.30   0
  -2 -17   7  174.22    3.22   0
  -2 -16   6   31.42    1.74   0
  -2 -14   5   61.31    2.61   0
  -2 -12   4    1.02    1.67   0
  -2  -6   3   41.14    1.81   0
  -2  -5   3   46.54    1.93   0
  -1 -21   7   -2.79    2.07   0
  -1 -20   6   56.97    2.25   0
  -1 -19   5   63.98    2.38   0
  -1 -12   2  628.42    4.49   0
  -1   7   4   61.03    3.47   0
  -1  11   8    3.91    2.92   0
   0 -23   6   25.26    2.39   0
   0 -22   5    1.81    2.06   0
   0 -21   4   56.52    2.38   0
   0 -15   1  103.15    2.21   0
   0   7   2   22.87    2.42   0
   0   9   3  447.45    5.09   0
   0  13   7   93.09    3.27   0
   1 -22   3   18.70    2.74   0
   1 -19   1    0.22    1.74   0
   1 -16   0   53.88    2.38   0
   1  13   4  677.72    4.91   0
   1  14   5  318.00    3.83   0
   2 -23   2    5.97    2.73   0
   2 -17  -1   54.46    2.03   0
   2 -13  -2   40.37    2.36   0
   2   9   0  417.24    3.80   0
   2  11   1 3130.36    9.34   0
   2  14   3  263.54    3.29   0
   2  15   4   -0.47    2.17   0
   2  17   7   16.81    2.41   0
   3 -22   0   32.98    2.07   0
   3 -20  -1   -0.51    1.99   0
   3 -17  -2  182.89    3.52   0
   3  13   1   15.11    1.60   0
   3  18   6    2.91    2.48   0
   4 -22  -1   38.53    2.77   0
   4   6  -3   92.29    2.21   0
   4   9  -2  143.26    2.33   0
   4  15   1   76.03    2.44   0
   4  16   2   15.55    1.70   0
   4  17   3  105.37    2.15   0
   4  18   4   19.37    2.46   0
   4  19   6    2.37    2.02   0
   5 -19  -3    8.97    2.53   0
   5  -1  -5  229.19    3.82   0
   5   5  -4 1114.21    5.94   0
   5  11  -2    7.66    1.58   0
   5  13  -1   19.57    1.73   0
   5  16   1   -1.12    1.66   0
   5  19   4   23.42    2.69   0
   5  20   6    4.07    2.17   0
   6   3  -5   22.36    1.64   0
   6  16   0   28.03    2.54   0
   6  19   3   -2.28    2.03   0
   6  20   4   83.71    2.89   0
   7   9  -4   95.47    2.07   0
   7  17   0   29.84    2.73   0
   7  18   1   18.01    1.99   0
   7  19   2    2.12    2.00   0
   7  20   3   -6.96    2.96   0
   8   7  -5  132.51    2.46   0
   8  16  -1   14.74    1.94   0
   9   4  -6  258.41    3.14   0
   9   8  -5    3.91    2.00   0
   9  11  -4    2.04    1.83   0
   9  15  -2   45.86    2.33   0
  10  -1  -7    4.16    2.73   0
  10   9  -5    9.71    2.65   0
  10  14  -3   20.59    2.86   0
  11   0  -7   -0.47    2.87   0
  11   6  -6   57.86    3.14   0
  11  12  -4    1.81    2.96   0
  -3 -13  10   72.33    2.30   0
  -3 -13  11   33.49    2.31   0
  -3 -12   9   95.89    2.90   0
  -3 -12  12   -0.82    2.56   0
  -3 -11   8    6.82    2.41   0
  -3 -10   7  115.88    2.47   0
  -3  -9   7  227.38    3.12   0
  -3  -1  14   52.80    3.40   0
  -3   0   7   -1.27    1.92   0
  -3   1  13   12.61    3.15   0
  -3   3  10    1.09    2.40   0
  -2 -18  10   13.62    2.15   0
  -2 -17   8   10.34    2.30   0
  -2 -16   7   17.91    2.50   0
  -2 -15   6   16.69    2.46   0
  -2 -11   4  208.51    2.55   0
  -2   1   4  179.43    4.38   0
  -1 -21   8   10.67    2.15   0
  -1 -20   7   45.68    2.55   0
  -1 -19   6   54.00    2.75   0
  -1 -18   5   34.32    2.25   0
  -1 -17   4   10.38    1.81   0
  -1 -15   3   10.03    1.63   0
  -1   5   3   12.96    2.85   0
   0 -22   6   10.28    2.84   0
   0 -20   4   42.94    2.82   0
   0 -19   3   50.64    1.95   0
   0 -17   2   38.93    1.98   0
   0 -14   1   35.38    2.36   0
   0 -10   0  330.23    3.61   0
   0  14   9    2.25    2.87   0
   0  14  10   38.29    2.97   0
   1 -24   5    5.71    2.22   0
   1 -23   4   -0.33    2.33   0
   1 -20   2   -3.04    2.51   0
   1 -18   1   41.54    2.76   0
   1 -12  -1  113.67    2.50   0
   1   2  -1 2274.59   13.79   0
   1   6   0 4676.28   14.10   0
   1  12   3  182.86    3.21   0
   1  15   6   27.11    2.41   0
   1  16   9    4.20    2.76   0
   1  16  10    5.38    2.71   0
   2 -24   3   -4.79    2.18   0
   2 -21   1   15.24    2.40   0
   2 -19   0   39.90    2.28   0
   2   3  -2  174.84    3.71   0
   2  13   2   68.97    2.52   0
   2  16   5   16.06    1.79   0
   3 -23   1  147.54    3.41   0
   3   7  -2  251.71    3.45   0
   3  15   2  294.65    3.42   0
   3  16   3   79.70    2.82   0
   3  17   4  256.39    3.48   0
   3  19   8    1.67    2.60   0
   4 -19  -2    7.50    2.68   0
   4 -16  -3  265.54    4.16   0
   4   2  -4   -1.68    2.09   0
   4  12  -1    5.28    2.10   0
   4  19   5   13.86    2.66   0
   5 -21  -2    2.10    2.84   0
   5 -15  -4    7.40    2.69   0
   5   9  -3   23.50    2.25   0
   5  20   5   19.19    2.92   0
   6   4  -5  505.61    4.14   0
   6   8  -4   92.29    2.42   0
   6  11  -3  591.30    4.13   0
   6  13  -2    3.28    1.69   0
   6  15  -1   61.02    2.51   0
   7   0  -6  155.99    2.83   0
   7   6  -5  181.64    2.59   0
   7  12  -3   98.15    2.28   0
   7  14  -2   41.26    1.80   0
   7  16  -1  166.67    3.17   0
   8   3  -6    4.66    1.63   0
   8   8  -5   -1.90    2.15   0
   8  11  -4   22.53    2.47   0
   8  13  -3    2.52    1.97   0
   8  15  -2   13.91    1.91   0
   8  18   0    0.60    2.05   0
   8  19   1   23.67    2.20   0
   9  -6  -7   48.71    3.16   0
   9  -5  -7    9.62    2.54   0
   9  -4  -7   72.52    3.15   0
   9  -3  -7   72.34    3.43   0
   9   5  -6    0.38    2.59   0
   9   9  -5    5.70    2.66   0
   9  14  -3   54.98    2.75   0
  10 -10  -7   -0.15    4.04   0
  10   0  -7   -3.57    2.70   0
  10   6  -6   47.89    2.19   0
  10  12  -4   17.27    2.07   0
  11   1  -7    1.29    2.12   0
  11   7  -6   25.98    2.66   0
  11  10  -5   88.69    2.52   0
  -3 -12  10   85.90    2.24   0
  -3 -12  11    5.76    1.93   0
  -3 -11   9   96.05    2.64   0
  -3 -11  10   90.05    2.95   0
  -3 -11  11   -1.19    2.85   0
  -3 -11  12    4.33    2.17   0
  -3 -10   8  128.42    2.75   0
  -3 -10  13   26.28    2.36   0
  -3  -9  13    7.24    3.16   0
  -3  -8   7  100.91    2.51   0
  -3  -7   7    7.55    2.14   0
  -3  -4  14   12.26    3.25   0
  -3  -3  14   30.88    3.39   0
  -3  -2  14   10.45    2.78   0
  -3  -1   7   19.05    2.29   0
  -3   1   8  361.80    4.74   0
  -3   2   9    2.56    2.56   0
  -3   2  12   29.92    2.88   0
  -2 -17   9   57.79    2.28   0
  -2 -17  10   -0.72    2.08   0
  -2 -16   8    2.59    2.67   0
  -2 -14   6   11.16    2.37   0
  -2 -13   5   75.64    2.01   0
  -2 -10   4    3.31    1.44   0
  -1 -20   8   56.97    2.33   0
  -1 -20   9   23.84    3.08   0
  -1 -16   4   59.55    2.36   0
  -1 -14   3  212.14    2.57   0
  -1 -11   2   56.29    1.88   0
   0 -22   7    3.46    2.95   0
   0 -21   5   17.22    1.93   0
   0 -18   3   -5.59    2.31   0
   0 -16   2   35.27    2.47   0
   0  -9   0   -0.27    1.56   0
   0  12   5    1.91    2.14   0
   0  14   8  432.34    5.59   0
   0  14  11   14.81    2.99   0
   1 -23   5   96.79    3.28   0
   1 -21   3   37.81    2.66   0
   1 -15   0   89.63    2.54   0
   1 -11  -1  117.28    3.10   0
   1  16   8   -1.40    2.36   0
   2 -22   2   47.87    2.85   0
   2 -16  -1   33.60    1.90   0
   2 -12  -2  213.84    3.49   0
   2   7  -1    8.96    1.61   0
   2  17   6   82.04    3.03   0
   2  18   9   -5.48    2.63   0
   3 -24   2    4.27    2.91   0
   3 -21   0    0.76    2.25   0
   3 -19  -1  146.44    2.69   0
   3 -16  -2    5.87    2.30   0
   3 -12  -3   54.82    2.58   0
   3   3  -3   67.03    2.21   0
   3  10  -1   26.66    1.69   0
   3  12   0  331.17    3.11   0
   3  14   1   72.70    2.38   0
   3  18   5   -3.78    2.64   0
   3  19   7   10.46    2.92   0
   4 -23   0    1.71    2.12   0
   4 -21  -1    4.02    2.64   0
   4 -11  -4    4.82    2.38   0
   4   7  -3   -2.02    1.98   0
   4  10  -2    1.67    1.87   0
   4  14   0    2.37    1.69   0
   4  17   2   14.35    2.08   0
   4  18   3   -1.11    2.41   0
   5 -23  -1   11.67    2.17   0
   5   0  -5    3.47    2.13   0
   5   6  -4  821.43    4.69   0
   5  12  -2  101.16    2.57   0
   5  14  -1  334.47    3.49   0
   5  17   1  177.82    2.96   0
   5  18   2   12.83    1.98   0
   5  19   3   42.50    2.12   0
   6 -20  -3   -0.63    2.71   0
   6 -13  -5   51.54    3.38   0
   6  17   0   11.94    2.33   0
   6  18   1   10.70    1.97   0
   6  19   2   17.75    2.02   0
   6  20   3   -1.36    2.75   0
   7 -19  -4    0.02    2.52   0
   7   1  -6    9.90    2.34   0
   7   7  -5   28.89    2.21   0
   7  10  -4   -1.74    1.95   0
   7  19   1    5.09    2.95   0
   7  20   2    7.39    2.85   0
   8 -17  -5    3.30    3.39   0
   8   4  -6   15.29    2.34   0
   8  17  -1  166.75    2.80   0
   9  -7  -7   14.80    3.07   0
   9  -2  -7    1.65    2.54   0
   9   6  -6   -0.81    2.47   0
   9  12  -4   22.98    2.15   0
   9  16  -2   24.19    2.23   0
  10   1  -7    8.41    2.85   0
  10   7  -6   52.42    2.80   0
  10  10  -5   12.01    2.06   0
  10  13  -4    1.98    2.91   0
  10  15  -3   -7.11    2.90   0
  11   2  -7    6.42    2.15   0
  11  11  -5  103.05    3.04   0
  -3 -10   9  127.57    2.40   0
  -3 -10  10   40.39    2.96   0
  -3 -10  11  164.44    3.42   0
  -3 -10  12   10.99    2.15   0
  -3  -9   8   11.60    1.76   0
  -3  -9  12   48.83    3.02   0
  -3  -8   8   73.55    2.69   0
  -3  -8  13   15.30    2.73   0
  -3  -7  13   19.54    2.93   0
  -3  -6   7  100.66    2.55   0
  -3  -5   7   12.34    2.25   0
  -3  -4   7    5.33    2.13   0
  -3  -3   7  205.86    3.35   0
  -3  -2   7  143.41    3.05   0
  -3  -1  13   22.16    3.14   0
  -3   0  13    0.37    2.62   0
  -3   1  12   69.50    3.34   0
  -3   2  10   16.10    3.06   0
  -3   2  11   45.58    2.87   0
  -2 -16   9    7.33    1.88   0
  -2 -16  10   25.08    2.70   0
  -2 -16  11   -2.77    2.66   0
  -2 -15   7   -0.48    1.66   0
  -2 -12   5  139.74    2.27   0
  -2  -9   4   22.48    1.64   0
  -1 -19   7   12.03    1.98   0
  -1 -19   8   -2.01    2.95   0
  -1 -18   6  143.41    2.76   0
  -1 -17   5   61.99    2.10   0
  -1 -15   4  234.15    3.27   0
  -1 -13   3   32.79    2.25   0
  -1 -10   2    6.57    1.68   0
  -1  10   6   58.86    2.93   0
   0 -21   6   33.01    2.52   0
   0 -20   5    1.04    2.64   0
   0 -19   4   17.63    2.31   0
   0 -13   1   49.24    1.86   0
   0  -8   0  421.08    4.45   0
   0  11   4   -1.40    2.16   0
   0  13   6   53.66    2.91   0
   1 -22   4   -3.26    2.03   0
   1 -19   2   61.25    2.51   0
   1 -17   1  166.19    3.14   0
   1   9   1  517.30    4.53   0
   1  11   2  107.90    2.44   0
   1  16   7   39.36    2.71   0
   2 -24   4    9.01    2.15   0
   2 -23   3    4.51    2.04   0
   2 -20   1   23.64    2.39   0
   2 -18   0    4.47    2.46   0
   2  10   0  117.97    2.43   0
   2  12   1  113.70    2.19   0
   2  15   3   71.37    2.53   0
   2  16   4    1.85    2.33   0
   2  18   8   -0.72    2.90   0
   3  19   6   28.52    2.62   0
   4 -24   1    4.84    2.62   0
   4   3  -4  762.34    5.67   0
   4  16   1   69.48    2.83   0
   4  19   4   90.87    3.20   0
   4  20   6   67.76    2.58   0
   5 -18  -3    2.92    2.40   0
   5   1  -5  246.09    3.72   0
   5  10  -3  360.56    3.49   0
   5  16   0  105.34    2.23   0
   5  20   4    9.87    2.21   0
   6 -22  -2   12.05    2.65   0
   6 -17  -4   66.94    2.81   0
   6   5  -5   28.92    2.15   0
   6   9  -4  174.19    2.85   0
   6  12  -3  144.77    2.62   0
   6  14  -2   -1.45    2.31   0
   6  16  -1   18.47    2.16   0
   7 -21  -3   -0.52    2.97   0
   7   2  -6   12.25    2.30   0
   7  13  -3    0.08    1.61   0
   7  15  -2  163.64    2.61   0
   7  17  -1  106.32    2.69   0
   7  18   0   51.99    2.13   0
   8   5  -6   38.59    2.57   0
   8   9  -5   47.74    2.48   0
   8  12  -4   23.99    2.63   0
   8  14  -3    9.47    1.84   0
   8  16  -2   -2.52    1.77   0
   8  19   0   57.81    3.07   0
   9  -8  -7   11.68    3.35   0
   9  -1  -7   40.44    2.83   0
   9   0  -7   -1.40    2.51   0
   9  10  -5  116.15    2.39   0
   9  13  -4   17.60    2.57   0
   9  15  -3   15.16    2.82   0
   9  17  -2   -4.56    2.57   0
   9  18  -1   28.79    2.30   0
  10   2  -7  240.58    3.83   0
  10  11  -5    0.31    2.82   0
  11   3  -7    1.02    2.12   0
  11   8  -6   10.78    2.16   0
  -3  -9   9  148.92    2.56   0
  -3  -9  10  101.30    2.82   0
  -3  -9  11   26.96    2.06   0
  -3  -8   9   20.21    2.60   0
  -3  -8  11    7.90    2.58   0
  -3  -8  12    0.32    2.45   0
  -3  -7   8  232.38    3.40   0
  -3  -7  12   29.00    2.80   0
  -3  -6  13   27.38    2.30   0
  -3  -5  13    0.88    2.55   0
  -3  -4  13   25.77    2.97   0
  -3  -3  13   11.21    2.96   0
  -3  -2  13    5.54    2.48   0
  -3   0   8  279.71    4.13   0
  -3   0  12   37.07    2.85   0
  -3   1   9   -1.01    2.29   0
  -3   1  11    6.63    2.56   0
  -2 -15   8    5.22    1.89   0
  -2 -15   9    8.83    2.71   0
  -2 -15  10    1.38    2.67   0
  -2 -15  11   55.73    3.20   0
  -2 -14   7   12.64    1.78   0
  -2 -13   6   37.99    1.86   0
  -2 -11   5   98.96    2.22   0
  -2  -8   4  287.18    3.14   0
  -2  -7   4 1002.75    5.87   0
  -2   0   4 3747.80   15.54   0
  -1 -19   9    6.14    2.27   0
  -1 -18   7    2.61    2.24   0
  -1 -17   6   74.56    2.50   0
  -1 -16   5   20.95    2.54   0
  -1  -9   2   82.81    2.18   0
  -1   9   5   13.25    2.29   0
  -1  11   7    4.03    2.76   0
   0 -21   7   12.79    2.62   0
   0 -17   3  163.10    2.53   0
   0 -15   2   10.50    2.00   0
   0 -12   1  737.94    4.98   0
   0  -7   0    2.78    2.34   0
   0   5   1   37.41    2.40   0
   0  14   7  112.68    3.58   0
   1 -23   6    5.25    2.15   0
   1 -22   5   -4.94    2.86   0
   1 -21   4   20.01    2.82   0
   1 -20   3   50.24    2.63   0
   1 -14   0 1258.95    6.27   0
   1 -10  -1   59.89    2.79   0
   1  13   3  302.35    3.66   0
   1  14   4   31.40    2.27   0
   1  15   5  123.64    3.06   0
   2 -21   2  184.43    3.29   0
   2 -15  -1  199.38    3.01   0
   2 -11  -2   28.01    2.46   0
   2   4  -2  289.47    4.04   0
   2  14   2   49.11    2.31   0
   2  17   5   35.35    2.45   0
   2  18   7   11.93    2.80   0
   3 -23   2   11.55    3.04   0
   3 -22   1   15.30    2.01   0
   3 -20   0   35.17    2.72   0
   3 -18  -1   70.14    2.70   0
   3 -11  -3  176.61    3.80   0
   3   4  -3  944.10    5.89   0
   3   8  -2  631.95    4.44   0
   3  11  -1   -0.30    2.07   0
   3  13   0  518.52    4.12   0
   3  16   2    7.66    2.35   0
   3  17   3   43.36    1.94   0
   3  18   4   20.24    2.81   0
   4 -22   0   16.31    2.88   0
   4 -18  -2   13.06    2.45   0
   4 -15  -3  201.72    3.66   0
   4   8  -3   72.22    2.43   0
   4  11  -2   92.81    2.47   0
   4  13  -1   22.18    1.60   0
   4  15   0    2.83    2.33   0
   4  20   5   29.67    2.92   0
   5 -22  -1   52.21    3.24   0
   5 -20  -2    0.80    2.79   0
   5   7  -4    2.39    1.50   0
   5  13  -2  637.22    4.32   0
   5  15  -1   27.16    2.64   0
   5  19   2   41.25    2.68   0
   5  21   5    8.93    2.27   0
   6  19   1   30.73    2.71   0
   6  20   2   56.79    3.15   0
   7 -15  -5  165.49    4.53   0
   7   3  -6   44.38    2.53   0
   7   8  -5   10.42    2.28   0
   7  11  -4    4.36    1.69   0
   7  20   1   14.27    2.59   0
   8  15  -3   53.44    2.58   0
   8  18  -1    6.84    2.14   0
   9   1  -7   47.99    2.84   0
   9   7  -6   31.46    2.18   0
   9  11  -5    4.22    2.32   0
  10   3  -7    9.85    2.73   0
  10   8  -6  114.85    2.47   0
  10  14  -4   -4.53    2.16   0
  11   4  -7   18.95    2.07   0
  11   9  -6   10.62    2.93   0
  -3  -8  10    0.89    1.64   0
  -3  -7   9   12.46    2.24   0
  -3  -7  10  132.68    3.09   0
  -3  -7  11    1.06    2.65   0
  -3  -6   8  232.01    2.99   0
  -3  -6  12   59.40    2.81   0
  -3  -5   8    1.16    2.01   0
  -3  -5  12   45.43    2.97   0
  -3  -4   8  179.02    3.06   0
  -3  -4  12   19.31    2.75   0
  -3  -3   8   16.04    2.15   0
  -3  -3  12   65.14    2.89   0
  -3  -2   8   13.68    2.22   0
  -3  -2  12   32.82    2.79   0
  -3  -1   8  348.86    4.22   0
  -3  -1  12   72.84    3.01   0
  -3   0   9   -0.04    2.27   0
  -3   0  11    1.22    2.56   0
  -3   1  10    1.04    2.73   0
  -2 -14   8  177.26    2.63   0
  -2 -14   9    1.16    2.72   0
  -2 -14  11   -2.38    3.18   0
  -2 -14  12   15.86    2.33   0
  -2 -13   7    5.39    2.51   0
  -2 -12   6    2.58    1.71   0
  -2 -10   5  358.22    3.22   0
  -2  -6   4   11.02    2.15   0
  -2   5  14   18.25    3.69   0
  -1 -18   8   31.32    2.15   0
  -1 -18   9    5.65    3.16   0
  -1 -18  10    9.36    3.13   0
  -1 -14   4  142.30    2.34   0
  -1 -12   3   28.41    1.55   0
  -1  -8   2  771.04    5.39   0
  -1  12   9   85.95    4.22   0
  -1  12  10   28.00    3.83   0
   0 -21   8   12.04    2.23   0
   0 -20   6   19.94    2.08   0
   0 -19   5   78.32    2.80   0
   0 -18   4  162.95    2.48   0
   0  -6   0 2711.43   11.68   0
   0   8   2  440.08    4.84   0
   0  10   3  521.15    5.24   0
   1 -18   2   73.67    2.54   0
   1 -16   1    7.96    2.27   0
   1   3  -1  586.73    6.48   0
   1   7   0 1161.61    6.77   0
   1  16   6   -2.40    2.41   0
   1  17   9   -0.46    2.41   0
   2 -23   4   -3.67    2.10   0
   2 -22   3   -5.97    2.03   0
   2 -19   1    8.49    2.38   0
[truncated: 6,225,066 more chars]
